# Supplementary material for: MicroRNA Expression Profiling in CCl4-Induced Liver Fibrosis of Mus musculus
Source: Int J Mol Sci. 2016 Jun 17;17(6):961. doi: 10.3390/ijms17060961 (PMC4926493; doi:10.3390/ijms17060961)
Supplement: Supplementary file 1 [file ijms-17-00961-s001.xlsx]

## Sheet: miRNA proflile
Table S1. MiRNA expression profiles of CCl4-induced liver fibrosis in mice.
ProbeID	Accessions	Log2(CCL4/Cornoil)	AveExpr	t	P.Value	adj.P.Val	B
mmu-miR-574-5p	mir|mmu-miR-574-5p|mir|MIMAT0004893	3.62521	6.30535	21.9012	2.33466e-06	0.000259147	5.89897
mmu-miR-466i-5p	mir|mmu-miR-466i-5p|mir|MIMAT0017325	3.08436	8.07486	15.2936	1.49624e-05	0.000830411	4.00643
mmu-miR-378a-3p	mir|mmu-miR-378a-3p|mir|MIMAT0003151|mir|mmu-miR-378_v17.0|mir|MIMAT0003151|mir|mmu-miR-378-3p_v18.0|mir|MIMAT0003151	-1.33878	6.20654	-12.3965	4.38684e-05	0.00162313	2.84046
mmu-miR-342-3p	mir|mmu-miR-342-3p|mir|MIMAT0000590	1.18056	5.96936	9.78211	0.000145259	0.00327332	1.50522
mmu-miR-202-3p	mir|mmu-miR-202-3p|mir|MIMAT0000235	-1.07911	4.91661	-9.49981	0.000168175	0.00327332	1.33993
mmu-miR-378b	mir|mmu-miR-378b|mir|MIMAT0019348	-1.36023	5.70996	-9.30455	0.000186542	0.00327332	1.22279
mmu-miR-378d	mir|mmu-miR-378d|mir|MIMAT0025167	-1.42484	5.95074	-9.11724	0.000206426	0.00327332	1.10816
mmu-let-7i-5p	mir|mmu-let-7i-5p|mir|MIMAT0000122|mir|mmu-let-7i_v17.0|mir|MIMAT0000122	1.1365	8.6276	6.38067	0.00117101	0.0162477	-0.871401
mmu-miR-212-3p	mir|mmu-miR-212-3p|mir|MIMAT0000659|mir|mmu-miR-212_v15.0|mir|MIMAT0000659	-1.13271	6.94158	-6.02142	0.00153752	0.0189628	-1.18323
mmu-miR-34a-5p	mir|mmu-miR-34a-5p|mir|MIMAT0000542|mir|mmu-miR-34a_v17.0|mir|MIMAT0000542	1.87146	6.87857	5.22049	0.00296185	0.0328765	-1.9335
mmu-miR-188-5p	mir|mmu-miR-188-5p|mir|MIMAT0000217	2.70078	3.61642	4.6368	0.00501019	0.0427793	-2.53334
mmu-miR-5119	mir|mmu-miR-5119|mir|MIMAT0020627	1.04805	3.28153	4.79987	0.00430683	0.0427793	-2.36096
mmu-miR-3072-5p	mir|mmu-miR-3072-5p|mir|MIMAT0014852|mir|mmu-miR-3072*_v17.0|mir|MIMAT0014852	0.828491	3.60849	4.69585	0.00474116	0.0427793	-2.47048
mmu-miR-1904	mir|mmu-miR-1904|mir|MIMAT0007874	-0.527424	4.68503	-4.43902	0.00604829	0.0479543	-2.74759
mmu-miR-677-3p	mir|mmu-miR-677-3p|mir|MIMAT0017246|mir|mmu-miR-677*_v17.0|mir|MIMAT0017246	-0.517877	4.71723	-4.14747	0.0080641	0.0596743	-3.07401
mmu-miR-15a-5p	mir|mmu-miR-15a-5p|mir|MIMAT0000526|mir|mmu-miR-15a_v17.0|mir|MIMAT0000526	-0.62258	8.79666	-3.88658	0.0105422	0.0688347	-3.37695
mmu-miR-6368	mir|mmu-miR-6368|mir|MIMAT0025112	-0.95911	8.49613	-3.89386	0.0104623	0.0688347	-3.36837
mmu-miR-652-5p	mir|mmu-miR-652-5p|mir|MIMAT0017260|mir|mmu-miR-652*_v17.0|mir|MIMAT0017260	-0.946926	7.62704	-3.72246	0.0125444	0.0773572	-3.57283
mmu-miR-27a-3p	mir|mmu-miR-27a-3p|mir|MIMAT0000537|mir|mmu-miR-27a_v17.0|mir|MIMAT0000537	1.43296	7.83677	3.66761	0.0133073	0.0777425	-3.63919
mmu-miR-223-3p	mir|mmu-miR-223-3p|mir|MIMAT0000665|mir|mmu-miR-223_v17.0|mir|MIMAT0000665	1.45952	6.55513	3.4923	0.0161217	0.0852149	-3.85431
mmu-miR-6378	mir|mmu-miR-6378|mir|MIMAT0025124	-0.831211	2.841	-3.49771	0.0160253	0.0852149	-3.8476
mmu-miR-455-3p	mir|mmu-miR-455-3p|mir|MIMAT0003742|mir|mmu-miR-455_v17.0|mir|MIMAT0003742	-0.796641	3.24128	-3.42858	0.0173067	0.0858544	-3.93361
mmu-miR-101b-3p	mir|mmu-miR-101b-3p|mir|MIMAT0000616|mir|mmu-miR-101b_v17.0|mir|MIMAT0000616	-1.7184	7.01491	-3.40401	0.0177896	0.0858544	-3.96435
mmu-miR-16-5p	mir|mmu-miR-16-5p|mir|MIMAT0000527|mir|mmu-miR-16_v17.0|mir|MIMAT0000527	-0.403316	8.7447	-3.36596	0.0185677	0.0858754	-4.01211
mmu-miR-5622-3p	mir|mmu-miR-5622-3p|mir|MIMAT0022372	0.498497	4.37228	3.21644	0.022018	0.0977601	-4.20178
mmu-miR-125a-5p	mir|mmu-miR-125a-5p|mir|MIMAT0000135	1.50837	5.96558	3.06678	0.0262058	0.111879	-4.39462
mmu-miR-193a-3p	mir|mmu-miR-193a-3p|mir|MIMAT0000223|mir|mmu-miR-193_v17.0|mir|MIMAT0000223|mir|mmu-miR-193-3p_v18.0|mir|MIMAT0000223	-1.00644	7.89233	-2.95834	0.0297943	0.122488	-4.53609
mmu-miR-702-3p	mir|mmu-miR-702-3p|mir|MIMAT0003492	-0.632777	3.65861	-2.68482	0.0415075	0.164548	-4.89861
mmu-miR-2137	mir|mmu-miR-2137|mir|MIMAT0011213	1.52887	6.3015	2.53822	0.049798	0.178459	-5.0956
mmu-miR-3473b	mir|mmu-miR-3473b|mir|MIMAT0020367	0.583831	7.56735	2.5404	0.0496626	0.178459	-5.09266
mmu-miR-22-3p	mir|mmu-miR-22-3p|mir|MIMAT0000531|mir|mmu-miR-22_v17.0|mir|MIMAT0000531	-0.437935	11.0942	-2.53733	0.0498535	0.178459	-5.0968
mmu-miR-30c-5p	mir|mmu-miR-30c-5p|mir|MIMAT0000514|mir|mmu-miR-30c_v17.0|mir|MIMAT0000514	-0.573161	8.62544	-2.48775	0.0530554	0.178459	-5.16374
mmu-miR-3968	mir|mmu-miR-3968|mir|MIMAT0019352	-0.666628	11.9368	-2.50991	0.0515979	0.178459	-5.13381
mmu-miR-107-3p	mir|mmu-miR-107-3p|mir|MIMAT0000647|mir|mmu-miR-107_v17.0|mir|MIMAT0000647	-0.562319	7.79759	-2.42519	0.0574152	0.182088	-5.24836
mmu-miR-378a-5p	mir|mmu-miR-378a-5p|mir|MIMAT0000742|mir|mmu-miR-378*_v17.0|mir|MIMAT0000742|mir|mmu-miR-378-5p_v18.0|mir|MIMAT0000742	-1.07571	3.47545	-2.43827	0.0564725	0.182088	-5.23065
mmu-miR-497-5p	mir|mmu-miR-497-5p|mir|MIMAT0003453|mir|mmu-miR-497_v17.0|mir|MIMAT0003453	0.728965	6.50224	2.34089	0.0639087	0.197052	-5.36258
mmu-miR-92a-3p	mir|mmu-miR-92a-3p|mir|MIMAT0000539|mir|mmu-miR-92a_v17.0|mir|MIMAT0000539	-0.706097	7.55517	-2.25791	0.0710734	0.212228	-5.47515
mmu-miR-5105	mir|mmu-miR-5105|mir|MIMAT0020612	-0.852198	6.71471	-2.24079	0.0726547	0.212228	-5.49836
mmu-let-7e-5p	mir|mmu-let-7e-5p|mir|MIMAT0000524|mir|mmu-let-7e_v17.0|mir|MIMAT0000524	1.14529	7.30168	2.20884	0.075707	0.214616	-5.54169
mmu-miR-15b-5p	mir|mmu-miR-15b-5p|mir|MIMAT0000124|mir|mmu-miR-15b_v17.0|mir|MIMAT0000124	0.295083	7.72373	2.19231	0.077339	0.214616	-5.5641
mmu-miR-652-3p	mir|mmu-miR-652-3p|mir|MIMAT0003711|mir|mmu-miR-652_v17.0|mir|MIMAT0003711	1.36336	5.34547	2.09749	0.0874453	0.220269	-5.69248
mmu-miR-23a-3p	mir|mmu-miR-23a-3p|mir|MIMAT0000532|mir|mmu-miR-23a_v17.0|mir|MIMAT0000532	0.974124	8.23197	2.07707	0.0897968	0.220269	-5.72007
mmu-miR-24-3p	mir|mmu-miR-24-3p|mir|MIMAT0000219|mir|mmu-miR-24_v17.0|mir|MIMAT0000219	0.942088	8.93688	2.06446	0.0912827	0.220269	-5.7371
mmu-miR-26b-5p	mir|mmu-miR-26b-5p|mir|MIMAT0000534|mir|mmu-miR-26b_v17.0|mir|MIMAT0000534	-0.438613	8.37935	-2.10639	0.0864396	0.220269	-5.68044
mmu-miR-30b-5p	mir|mmu-miR-30b-5p|mir|MIMAT0000130|mir|mmu-miR-30b_v17.0|mir|MIMAT0000130	-0.60246	7.63873	-2.08562	0.0888043	0.220269	-5.70852
mmu-miR-148a-3p	mir|mmu-miR-148a-3p|mir|MIMAT0000516|mir|mmu-miR-148a_v17.0|mir|MIMAT0000516	-1.15463	8.86146	-2.08715	0.0886278	0.220269	-5.70645
mmu-miR-365-3p	mir|mmu-miR-365-3p|mir|MIMAT0000711|mir|mmu-miR-365_v17.0|mir|MIMAT0000711	-0.92373	6.3163	-1.92309	0.10979	0.259291	-5.92711
mmu-miR-125b-5p	mir|mmu-miR-125b-5p|mir|MIMAT0000136	0.899061	8.691	1.85493	0.120053	0.277622	-6.01796
mmu-miR-195a-5p	mir|mmu-miR-195a-5p|mir|MIMAT0000225|mir|mmu-miR-195_v17.0|mir|MIMAT0000225|mir|mmu-miR-195-5p_v18.0|mir|MIMAT0000225	0.629273	6.72122	1.81651	0.126262	0.286022	-6.06887
mmu-miR-19b-3p	mir|mmu-miR-19b-3p|mir|MIMAT0000513|mir|mmu-miR-19b_v17.0|mir|MIMAT0000513	-0.312363	8.14697	-1.79598	0.129712	0.28796	-6.09597
mmu-miR-194-5p	mir|mmu-miR-194-5p|mir|MIMAT0000224|mir|mmu-miR-194_v17.0|mir|MIMAT0000224	-1.82829	8.89655	-1.72411	0.142556	0.310269	-6.19028
mmu-miR-130a-3p	mir|mmu-miR-130a-3p|mir|MIMAT0000141|mir|mmu-miR-130a_v17.0|mir|MIMAT0000141	-0.347336	8.93716	-1.65881	0.15532	0.31927	-6.27503
mmu-miR-451a	mir|mmu-miR-451a|mir|MIMAT0001632|mir|mmu-miR-451_v18.0|mir|MIMAT0001632	-0.571464	9.60932	-1.66195	0.154682	0.31927	-6.27098
mmu-miR-192-5p	mir|mmu-miR-192-5p|mir|MIMAT0000517|mir|mmu-miR-192_v17.0|mir|MIMAT0000517	-1.94008	10.068	-1.66488	0.154088	0.31927	-6.26719
mmu-miR-296-5p	mir|mmu-miR-296-5p|mir|MIMAT0000374	0.24588	4.80757	1.53165	0.183488	0.370312	-6.437
mmu-miR-31-5p	mir|mmu-miR-31-5p|mir|MIMAT0000538|mir|mmu-miR-31_v17.0|mir|MIMAT0000538	-0.724102	5.84577	-1.51772	0.186857	0.370378	-6.45445
mmu-miR-494-3p	mir|mmu-miR-494-3p|mir|MIMAT0003182|mir|mmu-miR-494_v17.0|mir|MIMAT0003182	-0.66884	8.09534	-1.49226	0.193174	0.376182	-6.4862
mmu-miR-30e-5p	mir|mmu-miR-30e-5p|mir|MIMAT0000248|mir|mmu-miR-30e_v17.0|mir|MIMAT0000248	-0.547681	7.48749	-1.44557	0.205291	0.392884	-6.54385
mmu-miR-30d-5p	mir|mmu-miR-30d-5p|mir|MIMAT0000515|mir|mmu-miR-30d_v17.0|mir|MIMAT0000515	-0.489383	6.37521	-1.42205	0.211664	0.398215	-6.5726
mmu-miR-1895	mir|mmu-miR-1895|mir|MIMAT0007867	0.339789	4.82504	1.38633	0.221697	0.405025	-6.61584
mmu-miR-709	mir|mmu-miR-709|mir|MIMAT0003499	0.276805	7.77987	1.38326	0.222582	0.405025	-6.61954
mmu-let-7c-5p	mir|mmu-let-7c-5p|mir|MIMAT0000523|mir|mmu-let-7c_v17.0|mir|MIMAT0000523	0.912503	10.7983	1.24425	0.266128	0.440899	-6.78252
mmu-let-7b-5p	mir|mmu-let-7b-5p|mir|MIMAT0000522|mir|mmu-let-7b_v17.0|mir|MIMAT0000522	0.73368	10.5825	1.25165	0.263629	0.440899	-6.77408
mmu-miR-126-3p	mir|mmu-miR-126-3p|mir|MIMAT0000138	0.280218	10.1003	1.29116	0.250632	0.440899	-6.7285
mmu-miR-30a-5p	mir|mmu-miR-30a-5p|mir|MIMAT0000128|mir|mmu-miR-30a_v17.0|mir|MIMAT0000128	-0.250553	9.48663	-1.26498	0.259177	0.440899	-6.75878
mmu-miR-1839-3p	mir|mmu-miR-1839-3p|mir|MIMAT0009457	-0.263273	5.54374	-1.29769	0.248541	0.440899	-6.7209
mmu-miR-6243	mir|mmu-miR-6243|mir|MIMAT0024863	-0.553865	10.0803	-1.26567	0.258948	0.440899	-6.75799
mmu-miR-25-3p	mir|mmu-miR-25-3p|mir|MIMAT0000652|mir|mmu-miR-25_v17.0|mir|MIMAT0000652	-0.267293	6.42461	-1.20789	0.278723	0.454975	-6.82364
mmu-miR-29c-3p	mir|mmu-miR-29c-3p|mir|MIMAT0000536|mir|mmu-miR-29c_v17.0|mir|MIMAT0000536	-0.372983	9.52042	-1.16869	0.292895	0.464448	-6.8672
mmu-miR-151-5p	mir|mmu-miR-151-5p|mir|MIMAT0004536	-0.465397	6.49551	-1.17	0.292411	0.464448	-6.86576
mmu-miR-122-5p	mir|mmu-miR-122-5p|mir|MIMAT0000246|mir|mmu-miR-122_v17.0|mir|MIMAT0000246	-1.41066	13.214	-1.14142	0.303122	0.473894	-6.897
mmu-miR-5100	mir|mmu-miR-5100|mir|MIMAT0020607	0.335677	13.0801	1.08613	0.324807	0.493885	-6.95611
mmu-miR-93-5p	mir|mmu-miR-93-5p|mir|MIMAT0000540|mir|mmu-miR-93_v17.0|mir|MIMAT0000540	-0.187437	6.04838	-1.08625	0.324758	0.493885	-6.95599
mmu-miR-26a-5p	mir|mmu-miR-26a-5p|mir|MIMAT0000533|mir|mmu-miR-26a_v17.0|mir|MIMAT0000533	0.273887	9.6056	1.01374	0.355169	0.532753	-7.03064
mmu-miR-10a-5p	mir|mmu-miR-10a-5p|mir|MIMAT0000648|mir|mmu-miR-10a_v17.0|mir|MIMAT0000648	0.923984	6.3154	0.974975	0.372374	0.551113	-7.06915
mmu-miR-29b-3p	mir|mmu-miR-29b-3p|mir|MIMAT0000127|mir|mmu-miR-29b_v17.0|mir|MIMAT0000127	0.406209	9.34727	0.954826	0.381579	0.556479	-7.08875
mmu-miR-5109	mir|mmu-miR-5109|mir|MIMAT0020617	-0.432635	10.2504	-0.94523	0.386026	0.556479	-7.09798
mmu-miR-29a-3p	mir|mmu-miR-29a-3p|mir|MIMAT0000535|mir|mmu-miR-29a_v17.0|mir|MIMAT0000535	0.148774	10.9413	0.914699	0.400452	0.569874	-7.12692
mmu-miR-467f	mir|mmu-miR-467f|mir|MIMAT0005846	0.294414	2.83559	0.899305	0.407884	0.573103	-7.14125
mmu-let-7a-5p	mir|mmu-let-7a-5p|mir|MIMAT0000521|mir|mmu-let-7a_v17.0|mir|MIMAT0000521	0.346705	10.8445	0.879704	0.417503	0.579285	-7.15923
mmu-miR-3085-3p	mir|mmu-miR-3085-3p|mir|MIMAT0014879	-0.148462	3.62821	-0.862745	0.425964	0.583729	-7.17456
mmu-miR-100-5p	mir|mmu-miR-100-5p|mir|MIMAT0000655|mir|mmu-miR-100_v17.0|mir|MIMAT0000655	0.250195	5.53927	0.817262	0.449301	0.608201	-7.21453
mmu-miR-20a-5p	mir|mmu-miR-20a-5p|mir|MIMAT0000529|mir|mmu-miR-20a_v17.0|mir|MIMAT0000529	-0.182125	7.08422	-0.801859	0.457416	0.611725	-7.2277
mmu-miR-6538	mir|mmu-miR-6538|mir|MIMAT0025583	-0.241304	5.39144	-0.774389	0.472154	0.623918	-7.25068
mmu-miR-331-3p	mir|mmu-miR-331-3p|mir|MIMAT0000571	0.194511	4.71023	0.680999	0.524777	0.682997	-7.32395
mmu-let-7d-5p	mir|mmu-let-7d-5p|mir|MIMAT0000383|mir|mmu-let-7d_v17.0|mir|MIMAT0000383	0.147469	9.42557	0.673502	0.529169	0.682997	-7.32949
mmu-let-7f-5p	mir|mmu-let-7f-5p|mir|MIMAT0000525|mir|mmu-let-7f_v17.0|mir|MIMAT0000525	0.105742	10.5374	0.656323	0.539322	0.6881	-7.342
mmu-miR-3107-5p	mir|mmu-miR-3107-5p|mir|MIMAT0014943|mir|mmu-miR-3107_v17.0|mir|MIMAT0014943|mir|mmu-miR-486_v17.0|mir|MIMAT0003130|mir|mmu-miR-486-5p|mir|MIMAT0003130	-0.512264	3.7636	-0.641509	0.548179	0.691453	-7.35257
mmu-miR-3102-5p	mir|mmu-miR-3102-5p|mir|MIMAT0014933|mir|mmu-miR-3102*_v17.0|mir|MIMAT0014933	-0.356673	6.13732	-0.574083	0.58966	0.735418	-7.39802
mmu-miR-139-5p	mir|mmu-miR-139-5p|mir|MIMAT0000656	0.358455	4.45416	0.492752	0.642127	0.758257	-7.44687
mmu-miR-3098-5p	mir|mmu-miR-3098-5p|mir|MIMAT0014917	0.0856215	3.7467	0.49939	0.63775	0.758257	-7.44314
mmu-miR-2861	mir|mmu-miR-2861|mir|MIMAT0013803	-0.164118	5.92468	-0.501695	0.636234	0.758257	-7.44183
mmu-miR-345-5p	mir|mmu-miR-345-5p|mir|MIMAT0000595	-0.181982	5.18907	-0.528786	0.618565	0.758257	-7.42605
mmu-miR-21a-5p	mir|mmu-miR-21a-5p|mir|MIMAT0000530|mir|mmu-miR-21_v17.0|mir|MIMAT0000530|mir|mmu-miR-21-5p_v18.0|mir|MIMAT0000530	-0.300931	11.7358	-0.496547	0.639623	0.758257	-7.44474
mmu-miR-1224-5p	mir|mmu-miR-1224-5p|mir|MIMAT0005460|mir|mmu-miR-1224_v17.0|mir|MIMAT0005460	0.275409	8.45871	0.446906	0.672798	0.772422	-7.47142
mmu-miR-5097	mir|mmu-miR-5097|mir|MIMAT0020604|mir|mmu-miR-1274a_v16.0|mir|MIMAT0009445	0.241348	10.5876	0.445217	0.673942	0.772422	-7.47228
mmu-miR-140-3p	mir|mmu-miR-140-3p|mir|MIMAT0000152|mir|mmu-miR-140*_v17.0|mir|MIMAT0000152	0.111313	5.18897	0.443659	0.674999	0.772422	-7.47307
mmu-miR-211-3p	mir|mmu-miR-211-3p|mir|MIMAT0017059|mir|mmu-miR-211*_v17.0|mir|MIMAT0017059	0.242113	5.93946	0.402728	0.703044	0.788261	-7.49296
mmu-miR-103-3p	mir|mmu-miR-103-3p|mir|MIMAT0000546|mir|mmu-miR-103_v17.0|mir|MIMAT0000546	-0.167821	7.53569	-0.405796	0.700922	0.788261	-7.49153
mmu-miR-5126	mir|mmu-miR-5126|mir|MIMAT0020637	0.238743	9.18844	0.370775	0.725314	0.805098	-7.50723
mmu-miR-99a-5p	mir|mmu-miR-99a-5p|mir|MIMAT0000131|mir|mmu-miR-99a_v17.0|mir|MIMAT0000131	-0.120248	7.45879	-0.312964	0.766374	0.842253	-7.53019
mmu-miR-3960	mir|mmu-miR-3960|mir|MIMAT0019336	0.187935	8.72001	0.283634	0.78755	0.848719	-7.54041
mmu-let-7g-5p	mir|mmu-let-7g-5p|mir|MIMAT0000121|mir|mmu-let-7g_v17.0|mir|MIMAT0000121	-0.0569642	10.0452	-0.286306	0.785611	0.848719	-7.53951
mmu-miR-6360	mir|mmu-miR-6360|mir|MIMAT0025103	0.0518362	3.09343	0.265405	0.800817	0.854718	-7.54626
mmu-miR-423-5p	mir|mmu-miR-423-5p|mir|MIMAT0004825	-0.0642176	4.64491	-0.206048	0.844515	0.892773	-7.56271
mmu-miR-1249-3p	mir|mmu-miR-1249-3p|mir|MIMAT0010560|mir|mmu-miR-1249_v17.0|mir|MIMAT0010560	-0.0524139	4.72039	-0.17902	0.864634	0.905419	-7.56884
mmu-miR-23b-3p	mir|mmu-miR-23b-3p|mir|MIMAT0000125|mir|mmu-miR-23b_v17.0|mir|MIMAT0000125	0.0507791	8.24463	0.120684	0.90843	0.94239	-7.57918
mmu-miR-27b-3p	mir|mmu-miR-27b-3p|mir|MIMAT0000126|mir|mmu-miR-27b_v17.0|mir|MIMAT0000126	-0.0472113	7.18551	-0.10273	0.921991	0.947602	-7.58156
mmu-miR-3963	mir|mmu-miR-3963|mir|MIMAT0019341	0	15.1285	0	1	1	-7.58782
mmu-miR-6366	mir|mmu-miR-6366|mir|MIMAT0025110	0	16.4324	0	1	1	-7.58782
mmu-miR-3092-3p	mir|mmu-miR-3092-3p|mir|MIMAT0014906|mir|mmu-miR-3092_v17.0|mir|MIMAT0014906	-0.00246615	2.97019	-0.00542026	0.995875	1	-7.5878

## Sheet: miRNA Targets
Table S2. Predicted target genes of top 6 miRNAs dysregulated in CCl4-induced liver fibrosis.
Output																			Target
MicroRNA	Log2(CCL4/Cornoil_Notreat3)	AveExpr	t	P.Value	adj.P.Val	B	Gene	Description	RefseqID	GI	Seed Length	Start	Sequence	End	Region	Prediction_Pvalue	SPMS		Gene	Description	RefseqID	GI
mmu-let-7i	1.1365	8.6276	6.38067	0.00117101	0.0162477	-0.871401	Gabra6	gamma-aminobutyric acid (GABA) A receptor, subunit alpha 6 (Gabra6)	NM_008068	595582348	7	2177	UGAGGUA	2171	3UTR	0.0499	1		March3	membrane-associated ring finger (C3HC4) 3 (March3)	NM_177115	31342831
mmu-let-7i	1.1365	8.6276	6.38067	0.00117101	0.0162477	-0.871401	Ppm1f	protein phosphatase 1F (PP2C domain containing) (Ppm1f)	NM_176833	304361732	8	4419	UGAGGUAG	4412	3UTR	0.0499	1		March9	membrane-associated ring finger (C3HC4) 9 (March9)	NM_001033262	141802613
mmu-let-7i	1.1365	8.6276	6.38067	0.00117101	0.0162477	-0.871401	Mettl6	methyltransferase like 6 (Mettl6)	NM_025907	118129886	7	1486	GAGGUAG	1480	3UTR	0.0498	2		Sept2	septin 2 (Sept2)	NM_010891	228480249
mmu-let-7i	1.1365	8.6276	6.38067	0.00117101	0.0162477	-0.871401	Mettl6	methyltransferase like 6 (Mettl6)	NM_025907	118129886	7	1472	GAGGUAG	1466	3UTR	0.0498	2		Sept3	septin 3 (Sept3)	NM_011889	117606374
mmu-let-7i	1.1365	8.6276	6.38067	0.00117101	0.0162477	-0.871401	Cpsf4	cleavage and polyadenylation specific factor 4 (Cpsf4)	NM_178576	601983198	7	1434	GAGGUAG	1428	3UTR	0.0497	2		Sept12	septin 12 (Sept12)	NM_027669	321267577
mmu-let-7i	1.1365	8.6276	6.38067	0.00117101	0.0162477	-0.871401	Taf5	TAF5 RNA polymerase II, TATA box binding protein (TBP)-associated factor (Taf5)	NM_177342	110665721	7	2490	UGAGGUA	2484	3UTR	0.0497	1		0610006I08Rik	transmembrane protein 223 (Tmem223)	NM_025791	13385261
mmu-let-7i	1.1365	8.6276	6.38067	0.00117101	0.0162477	-0.871401	Zmat4	zinc finger, matrin type 4 (Zmat4)	NM_177086	469832275	8	4123	GAGGUAGU	4116	3UTR	0.0497	2		0610007L01Rik	transmembrane protein 248 (Tmem248)	NM_001081394	124487090
mmu-let-7i	1.1365	8.6276	6.38067	0.00117101	0.0162477	-0.871401	Slc28a1	solute carrier family 28 (sodium-coupled nucleoside transporter)	NM_001004184	227908842	7	2198	GAGGUAG	2192	3UTR	0.0496	2		0610007P08Rik	excision repair cross-complementing rodent repair deficiency, complementation group 6 like 2 (Ercc6l2)	NM_023507	91807127
mmu-let-7i	1.1365	8.6276	6.38067	0.00117101	0.0162477	-0.871401	1700019H03Rik	solute carrier family 17, member 9 (Slc17a9)	NM_183161	125347350	7	2059	GAGGUAG	2053	3UTR	0.0495	2		0610011L14Rik	AAR2 splicing factor homolog (S. cerevisiae) (Aar2)	NM_026661	258679442
mmu-let-7i	1.1365	8.6276	6.38067	0.00117101	0.0162477	-0.871401	Ccdc115	coiled-coil domain containing 115 (Ccdc115)	NM_027159	237649013	7	1240	UGAGGUA	1234	3UTR	0.0495	1		0610012H03Rik	thioesterase superfamily member 7 (Them7)	NM_028747	227452256
mmu-let-7i	1.1365	8.6276	6.38067	0.00117101	0.0162477	-0.871401	Ccdc115	coiled-coil domain containing 115 (Ccdc115)	NM_027159	237649013	7	937	UGAGGUA	931	3UTR	0.0495	1		0610025P10Rik	neuralized homolog 4 (Drosophila) (Neurl4)	NM_001013414	597955337
mmu-let-7i	1.1365	8.6276	6.38067	0.00117101	0.0162477	-0.871401	Slc10a6	solute carrier family 10 (sodium/bile acid cotransporter family)	NM_029415	141802045	7	1814	GAGGUAG	1808	3UTR	0.0495	2		0610037D15Rik	coiled-coil domain containing 163 (Ccdc163)	NM_026714	134053899
mmu-let-7i	1.1365	8.6276	6.38067	0.00117101	0.0162477	-0.871401	1700001C19Rik	RIKEN cDNA 1700001C19 gene (1700001C19Rik)	NM_029296	285401616	7	1145	UGAGGUA	1139	3UTR	0.0493	1		1100001E04Rik	Rho GTPase activating protein 36 (Arhgap36)	NM_001081123	124487452
mmu-let-7i	1.1365	8.6276	6.38067	0.00117101	0.0162477	-0.871401	3321401G04Rik	family with sequence similarity 115, member A (Fam115a)	NM_029930	141801726	7	2983	GAGGUAG	2977	3UTR	0.0493	2		1110002N22Rik	transcription elongation factor, mitochondrial (Tefm)	NM_183275	134053921
mmu-let-7i	1.1365	8.6276	6.38067	0.00117101	0.0162477	-0.871401	Asah3l	alkaline ceramidase 2 (Acer2)	NM_139306	594542521	8	1401	GAGGUAGU	1394	3UTR	0.0493	2		1110003E01Rik	small integral membrane protein 14 (Smim14)	NM_133697	141801855
mmu-let-7i	1.1365	8.6276	6.38067	0.00117101	0.0162477	-0.871401	Eea1	early endosome antigen 1 (Eea1)	NM_001001932	92859696	8	6944	GAGGUAGU	6937	3UTR	0.0493	2		1110005A03Rik	methyltransferase like 23 (Mettl23)	NM_028865	239049441
mmu-let-7i	1.1365	8.6276	6.38067	0.00117101	0.0162477	-0.871401	Hic1	hypermethylated in cancer 1 (Hic1)	NM_010430	148226884	7	3738	GAGGUAG	3732	3UTR	0.0493	2		1110007A13Rik	MCM (minichromosome maintenance deficient) binding protein (Mcmbp)	NM_145955	118130227
mmu-let-7i	1.1365	8.6276	6.38067	0.00117101	0.0162477	-0.871401	Tspan31	tetraspanin 31 (Tspan31)	NM_025982	158508709	7	1091	UGAGGUA	1085	3UTR	0.0492	1		1110008F13Rik	RIKEN cDNA 1110008F13 gene (1110008F13Rik)	NM_026124	213972650
mmu-let-7i	1.1365	8.6276	6.38067	0.00117101	0.0162477	-0.871401	Dcakd	dephospho-CoA kinase domain containing (Dcakd)	NM_026551	142370255	7	1464	GAGGUAG	1458	3UTR	0.0491	2		1110008P14Rik	RIKEN cDNA 1110008P14 gene (1110008P14Rik)	NM_198001	227452251
mmu-let-7i	1.1365	8.6276	6.38067	0.00117101	0.0162477	-0.871401	Hn1	hematological and neurological expressed sequence 1 (Hn1)	NM_008258	6680236	7	1026	UGAGGUA	1020	3UTR	0.049	1		1110014K08Rik	UBA-like domain containing 2 (Ubald2)	NM_176902	114326476
mmu-let-7i	1.1365	8.6276	6.38067	0.00117101	0.0162477	-0.871401	Htr4	5 hydroxytryptamine (serotonin) receptor 4 (Htr4)	NM_008313	145966722	8	2545	UGAGGUAG	2538	3UTR	0.0488	1		1110032A03Rik	RIKEN cDNA 1110032A03 gene (1110032A03Rik)	NM_023483	141803197
mmu-let-7i	1.1365	8.6276	6.38067	0.00117101	0.0162477	-0.871401	Mrgprg	MAS-related GPR, member G (Mrgprg)	NM_203492	71896630	7	1281	GAGGUAG	1275	3UTR	0.0488	2		1110037F02Rik	RIKEN cDNA 1110037F02 gene (1110037F02Rik)	NM_001081183	124487144
mmu-let-7i	1.1365	8.6276	6.38067	0.00117101	0.0162477	-0.871401	Tmie	transmembrane inner ear (Tmie)	NM_146260	118130173	7	1768	UGAGGUA	1762	3UTR	0.0485	1		1110038D17Rik	guanylyl cyclase domain containing 1 (Gucd1)	NM_175133	112181296
mmu-let-7i	1.1365	8.6276	6.38067	0.00117101	0.0162477	-0.871401	Ehhadh	enoyl-Coenzyme A, hydratase/3-hydroxyacyl Coenzyme A dehydrogenase (Ehhadh)	NM_023737	256600255	7	2359	GAGGUAG	2353	3UTR	0.0481	2		1110039B18Rik	transmembrane protein 214 (Tmem214)	NM_144525	142353473
mmu-let-7i	1.1365	8.6276	6.38067	0.00117101	0.0162477	-0.871401	Cox7b	cytochrome c oxidase subunit VIIb (Cox7b)	NM_025379	70909318	7	752	GAGGUAG	746	3UTR	0.0478	2		1110054O05Rik	INTS3 and NABP interacting protein (Inip)	NM_001013577	62526127
mmu-let-7i	1.1365	8.6276	6.38067	0.00117101	0.0162477	-0.871401	Fbxl22	F-box and leucine-rich repeat protein 22 (Fbxl22)	NM_175206	261862276	8	2755	UGAGGUAG	2748	3UTR	0.0474	1		1110057K04Rik	RIKEN cDNA 1110057K04 gene (1110057K04Rik)	NM_172401	269995974
mmu-let-7i	1.1365	8.6276	6.38067	0.00117101	0.0162477	-0.871401	Slc14a2	solute carrier family 14 (urea transporter)	NM_207651	159131879	7	3701	GAGGUAG	3695	3UTR	0.0474	2		1110059G10Rik	RIKEN cDNA 1110059G10 gene (1110059G10Rik)	NM_025419	258679468
mmu-let-7i	1.1365	8.6276	6.38067	0.00117101	0.0162477	-0.871401	Phca	alkaline ceramidase 3 (Acer3)	NM_025408	84794580	8	2704	UGAGGUAG	2697	3UTR	0.0473	1		1110067D22Rik	lectin, galactoside binding-like (Lgalsl)	NM_173752	158534081
mmu-let-7i	1.1365	8.6276	6.38067	0.00117101	0.0162477	-0.871401	Pla2g4c	phospholipase A2, group IVC (cytosolic, calcium-independent) (Pla2g4c)	NM_001004762	270341355	7	2179	UGAGGUA	2173	3UTR	0.0472	1		1190002N15Rik	RIKEN cDNA 1190002N15 gene (1190002N15Rik)	NM_001033145	115392139
mmu-let-7i	1.1365	8.6276	6.38067	0.00117101	0.0162477	-0.871401	Galnt1	UDP-N-acetyl-alpha-D-galactosamine:polypeptide N-acetylgalactosaminyltransferase 1 (Galnt1)	NM_013814	237874258	7	1983	GAGGUAG	1977	3UTR	0.0471	2		1190003M12Rik	gastrokine 3 (Gkn3)	NM_026860	114326172
mmu-let-7i	1.1365	8.6276	6.38067	0.00117101	0.0162477	-0.871401	Scarb1	scavenger receptor class B, member 1 (Scarb1)	NM_016741	326537316	7	2377	UGAGGUA	2371	3UTR	0.0471	1		1190005F20Rik	tRNA methyltransferase 1 like (Trmt1l)	NM_026876	229608907
mmu-let-7i	1.1365	8.6276	6.38067	0.00117101	0.0162477	-0.871401	Dtx4	deltex 4 homolog (Drosophila) (Dtx4)	NM_172442	188219610	8	5055	UGAGGUAG	5048	3UTR	0.047	1		1200002N14Rik	DNA-damage regulated autophagy modulator 1 (Dram1)	NM_027878	142366339
mmu-let-7i	1.1365	8.6276	6.38067	0.00117101	0.0162477	-0.871401	Lrrc50	dynein, axonemal assembly factor 1 (Dnaaf1)	NM_026648	158508695	7	2485	GAGGUAG	2479	3UTR	0.047	2		1200011I18Rik	GPALPP motifs containing 1 (Gpalpp1)	NM_026177	71043962
mmu-let-7i	1.1365	8.6276	6.38067	0.00117101	0.0162477	-0.871401	Prrx1	paired related homeobox 1 (Prrx1)	NM_011127	70909350	8	3245	UGAGGUAG	3238	3UTR	0.047	1		1200016B10Rik	SWT1 RNA endoribonuclease homolog (S. cerevisiae) (Swt1)	NM_025819	229577363
mmu-let-7i	1.1365	8.6276	6.38067	0.00117101	0.0162477	-0.871401	Twf1	SV2 related protein homolog (rat)-like (Svopl)	NM_177200	148368991	7	1932	GAGGUAG	1926	3UTR	0.047	2		1300001I01Rik	clustered mitochondria (cluA/CLU1) homolog (Cluh)	NM_001081158	148539945
mmu-let-7i	1.1365	8.6276	6.38067	0.00117101	0.0162477	-0.871401	Polq	polymerase (DNA directed)	NM_029977	226823284	7	7870	UGAGGUA	7864	3UTR	0.0468	1		1300014I06Rik	PX domain containing 1 (Pxdc1)	NM_025831	115292444
mmu-let-7i	1.1365	8.6276	6.38067	0.00117101	0.0162477	-0.871401	Pigs	phosphatidylinositol glycan anchor biosynthesis, class S (Pigs)	NM_201406	41351528	7	1977	GAGGUAG	1971	3UTR	0.0467	2		1500005I02Rik	BTB (POZ) domain containing 17 (Btbd17)	NM_028055	158508630
mmu-let-7i	1.1365	8.6276	6.38067	0.00117101	0.0162477	-0.871401	9930012K11Rik	RIKEN cDNA 9930012K11 gene (9930012K11Rik)	NM_001004155	163838622	7	1939	GAGGUAG	1933	3UTR	0.0466	2		1500010J02Rik	CTS telomere maintenance complex component 1 (Ctc1)	NM_001013256	219689063
mmu-let-7i	1.1365	8.6276	6.38067	0.00117101	0.0162477	-0.871401	Onecut3	one cut domain, family member 3 (Onecut3)	NM_139226	40538835	8	2810	UGAGGUAG	2803	3UTR	0.0466	1		1500019G21Rik	HSPA (heat shock 70kDa) binding protein, cytoplasmic cochaperone 1 (Hspbp1)	NM_024172	133893257
mmu-let-7i	1.1365	8.6276	6.38067	0.00117101	0.0162477	-0.871401	Trip13	thyroid hormone receptor interactor 13 (Trip13)	NM_027182	142350962	7	1545	GAGGUAG	1539	3UTR	0.0466	2		1500032D16Rik	NADH dehydrogenase (ubiquinone) flavoprotein 3 (Ndufv3)	NM_030087	140972308
mmu-let-7i	1.1365	8.6276	6.38067	0.00117101	0.0162477	-0.871401	Cpa4	carboxypeptidase A4 (Cpa4)	NM_027926	141802681	7	1565	GAGGUAG	1559	3UTR	0.0465	2		1600012H06Rik	RIKEN cDNA 1600012H06 gene (1600012H06Rik)	NM_001083880	139948865
mmu-let-7i	1.1365	8.6276	6.38067	0.00117101	0.0162477	-0.871401	Pdzk1	PDZ domain containing 1 (Pdzk1)	NM_021517	225579119	7	2305	GAGGUAG	2299	3UTR	0.0465	2		1600014K23Rik	trans-2,3-enoyl-CoA reductase (Tecr)	NM_134118	226342958
mmu-let-7i	1.1365	8.6276	6.38067	0.00117101	0.0162477	-0.871401	A430083B19Rik	sentan, cilia apical structure protein (Sntn)	NM_177624	142365087	7	1005	GAGGUAG	999	3UTR	0.0463	2		1600021P15Rik	Mab-21 domain containing 2 (Mb21d2)	NM_177718	86262156
mmu-let-7i	1.1365	8.6276	6.38067	0.00117101	0.0162477	-0.871401	Ccbl2	cysteine conjugate-beta lyase 2 (Ccbl2)	NM_173763	649572207	7	1874	UGAGGUA	1868	3UTR	0.0463	1		1700001C19Rik	RIKEN cDNA 1700001C19 gene (1700001C19Rik)	NM_029296	285401616
mmu-let-7i	1.1365	8.6276	6.38067	0.00117101	0.0162477	-0.871401	Kcnk6	potassium inwardly-rectifying channel, subfamily K, member 6 (Kcnk6)	NM_001033525	170295854	8	3884	GAGGUAGU	3877	3UTR	0.0463	2		1700007K13Rik	RIKEN cDNA 1700007K13 gene (1700007K13Rik)	NM_027040	110625741
mmu-let-7i	1.1365	8.6276	6.38067	0.00117101	0.0162477	-0.871401	Rnf7	ring finger protein 7 (Rnf7)	NM_011279	142369236	7	552	GAGGUAG	546	3UTR	0.0463	2		1700011F03Rik	testis expressed 37 (Tex37)	NM_028825	260447094
mmu-let-7i	1.1365	8.6276	6.38067	0.00117101	0.0162477	-0.871401	Slc25a45	solute carrier family 25, member 45 (Slc25a45)	NM_134154	146149102	7	1687	GAGGUAG	1681	3UTR	0.0463	2		1700012A03Rik	RIKEN cDNA 1700012A03 gene (1700012A03Rik)	NM_029587	142343827
mmu-let-7i	1.1365	8.6276	6.38067	0.00117101	0.0162477	-0.871401	Slc5a6	solute carrier family 5 (sodium-dependent vitamin transporter)	NM_177870	294979173	7	2969	GAGGUAG	2963	3UTR	0.046	2		1700013G24Rik	RIKEN cDNA 1700013G24 gene (1700013G24Rik)	NM_027063	124378009
mmu-let-7i	1.1365	8.6276	6.38067	0.00117101	0.0162477	-0.871401	Tgfbr3	transforming growth factor, beta receptor III (Tgfbr3)	NM_011578	229577251	8	5662	GAGGUAGU	5655	3UTR	0.046	2		1700015E13Rik	RIKEN cDNA 1700015E13 gene (1700015E13Rik)	NM_001039593	88853562
mmu-let-7i	1.1365	8.6276	6.38067	0.00117101	0.0162477	-0.871401	Arid3a	AT rich interactive domain 3A (BRIGHT-like) (Arid3a)	NM_007880	568599851	8	4231	UGAGGUAG	4224	3UTR	0.0459	1		1700016D06Rik	RIKEN cDNA 1700016D06 gene (1700016D06Rik)	NM_024271	21313197
mmu-let-7i	1.1365	8.6276	6.38067	0.00117101	0.0162477	-0.871401	Hoxd1	homeobox D1 (Hoxd1)	NM_010467	112983631	7	1607	GAGGUAG	1601	3UTR	0.0459	2		1700017B05Rik	RIKEN cDNA 1700017B05 gene (1700017B05Rik)	NM_028820	212549783
mmu-let-7i	1.1365	8.6276	6.38067	0.00117101	0.0162477	-0.871401	Tfam	transcription factor A, mitochondrial (Tfam)	NM_009360	145966787	8	3549	UGAGGUAG	3542	3UTR	0.0459	1		1700018C11Rik	RIKEN cDNA 1700018C11 gene (1700018C11Rik)	NM_029324	142377569
mmu-let-7i	1.1365	8.6276	6.38067	0.00117101	0.0162477	-0.871401	Zfp280b	zinc finger protein 280B (Zfp280b)	NM_177475	158749568	8	4257	UGAGGUAG	4250	3UTR	0.0459	1		1700019H03Rik	solute carrier family 17, member 9 (Slc17a9)	NM_183161	125347350
mmu-let-7i	1.1365	8.6276	6.38067	0.00117101	0.0162477	-0.871401	Col9a3	collagen, type IX, alpha 3 (Col9a3)	NM_009936	112363118	7	2294	UGAGGUA	2288	3UTR	0.0456	1		1700020C11Rik	mitochondrial fission process 1 (Mtfp1)	NM_026443	142362099
mmu-let-7i	1.1365	8.6276	6.38067	0.00117101	0.0162477	-0.871401	Slc20a1	solute carrier family 20, member 1 (Slc20a1)	NM_015747	227430318	7	3271	GAGGUAG	3265	3UTR	0.0455	2		1700029H14Rik	RIKEN cDNA 1700029H14 gene (1700029H14Rik)	NM_001080781	556503369
mmu-let-7i	1.1365	8.6276	6.38067	0.00117101	0.0162477	-0.871401	1200016B10Rik	SWT1 RNA endoribonuclease homolog (S. cerevisiae) (Swt1)	NM_025819	229577363	7	3111	GAGGUAG	3105	3UTR	0.0453	2		1700029P11Rik	RIKEN cDNA 1700029P11 gene (1700029P11Rik)	NM_025503	325995131
mmu-let-7i	1.1365	8.6276	6.38067	0.00117101	0.0162477	-0.871401	Impg2	interphotoreceptor matrix proteoglycan 2 (Impg2)	NM_174876	46519170	8	5598	UGAGGUAG	5591	3UTR	0.0453	1		1700034H14Rik	tranlocase of inner mitochondrial membrane 21 (Timm21)	NM_025969	158508438
mmu-let-7i	1.1365	8.6276	6.38067	0.00117101	0.0162477	-0.871401	Mmp11	matrix metallopeptidase 11 (Mmp11)	NM_008606	133893135	7	2090	UGAGGUA	2084	3UTR	0.0452	1		1700036D21Rik	protease, serine 44 (Prss44)	NM_148940	261823987
mmu-let-7i	1.1365	8.6276	6.38067	0.00117101	0.0162477	-0.871401	Arhgap28	Rho GTPase activating protein 28 (Arhgap28)	NM_172964	226342972	8	4798	GAGGUAGU	4791	3UTR	0.0451	2		1700037H04Rik	RIKEN cDNA 1700037H04 gene (1700037H04Rik)	NM_026091	141801935
mmu-let-7i	1.1365	8.6276	6.38067	0.00117101	0.0162477	-0.871401	Hmga2	high mobility group AT-hook 2 (Hmga2)	NM_010441	144922693	8	1227	UGAGGUAG	1220	3UTR	0.0451	1		1700039E15Rik	RIKEN cDNA 1700039E15 gene (1700039E15Rik)	NM_001033176	85701685
mmu-let-7i	1.1365	8.6276	6.38067	0.00117101	0.0162477	-0.871401	Snai1	snail family zinc finger 1 (Snai1)	NM_011427	31981483	7	1166	GAGGUAG	1160	3UTR	0.045	2		1700052N19Rik	RIKEN cDNA 1700052N19 gene (1700052N19Rik)	NM_024261	90093342
mmu-let-7i	1.1365	8.6276	6.38067	0.00117101	0.0162477	-0.871401	Snai1	snail family zinc finger 1 (Snai1)	NM_011427	31981483	7	870	GAGGUAG	864	3UTR	0.045	2		1700054N08Rik	centriole, cilia and spindle associated protein (Ccsap)	NM_028536	110625951
mmu-let-7i	1.1365	8.6276	6.38067	0.00117101	0.0162477	-0.871401	Syt11	synaptotagmin XI (Syt11)	NM_018804	124378013	8	3871	UGAGGUAG	3864	3UTR	0.045	1		1700088E04Rik	RIKEN cDNA 1700088E04 gene (1700088E04Rik)	NM_138581	75677332
mmu-let-7i	1.1365	8.6276	6.38067	0.00117101	0.0162477	-0.871401	Unc5d	unc-5 homolog D (C. elegans) (Unc5d)	NM_153135	228008378	7	3810	UGAGGUA	3804	3UTR	0.045	1		1700129I04Rik	family with sequence similarity 154, member B (Fam154b)	NM_177894	134288849
mmu-let-7i	1.1365	8.6276	6.38067	0.00117101	0.0162477	-0.871401	Ap1s1	adaptor protein complex AP-1, sigma 1 (Ap1s1)	NM_007457	118131012	7	961	GAGGUAG	955	3UTR	0.0447	2		1810008A18Rik	family with sequence similarity 207, member A (Fam207a)	NM_133998	227430354
mmu-let-7i	1.1365	8.6276	6.38067	0.00117101	0.0162477	-0.871401	Ap1s1	adaptor protein complex AP-1, sigma 1 (Ap1s1)	NM_007457	118131012	7	744	GAGGUAG	738	3UTR	0.0447	2		1810014F10Rik	fucose mutarotase (Fuom)	NM_026928	555290054
mmu-let-7i	1.1365	8.6276	6.38067	0.00117101	0.0162477	-0.871401	Mier1	mesoderm induction early response 1 homolog (Xenopus laevis (Mier1)	NM_027696	555290050	8	3726	UGAGGUAG	3719	3UTR	0.0447	1		1810026J23Rik	RIKEN cDNA 1810026J23 gene (1810026J23Rik)	NM_178619	340745339
mmu-let-7i	1.1365	8.6276	6.38067	0.00117101	0.0162477	-0.871401	Dbndd2	dysbindin (dystrobrevin binding protein 1) domain containing 2 (Dbndd2)	NM_001048227	115299763	8	3516	UGAGGUAG	3509	3UTR	0.0446	1		1810030O07Rik	RIKEN cDNA 1810030O07 gene (1810030O07Rik)	NM_175141	158508623
mmu-let-7i	1.1365	8.6276	6.38067	0.00117101	0.0162477	-0.871401	Tbcc	tubulin-specific chaperone C (Tbcc)	NM_178385	87044900	7	1691	GAGGUAG	1685	3UTR	0.0446	2		1810048J11Rik	pecanex-like 4 (Drosophila) (Pcnxl4)	NM_026327	124430538
mmu-let-7i	1.1365	8.6276	6.38067	0.00117101	0.0162477	-0.871401	Tspan32	tetraspanin 32 (Tspan32)	NM_020286	189303573	7	1515	GAGGUAG	1509	3UTR	0.0446	2		1810074P20Rik	UFM1 specific ligase 1 (Ufl1)	NM_026194	227330589
mmu-let-7i	1.1365	8.6276	6.38067	0.00117101	0.0162477	-0.871401	Rgr	retinal G protein coupled receptor (Rgr)	NM_021340	678246451	7	950	GAGGUAG	944	3UTR	0.0445	2		2010002N04Rik	small integral membrane protein 3 (Smim3)	NM_134133	125991226
mmu-let-7i	1.1365	8.6276	6.38067	0.00117101	0.0162477	-0.871401	Gfm2	G elongation factor, mitochondrial 2 (Gfm2)	NM_177266	407228371	7	3006	UGAGGUA	3000	3UTR	0.0443	1		2010003K11Rik	RIKEN cDNA 2010003K11 gene (2010003K11Rik)	NM_027237	58037184
mmu-let-7i	1.1365	8.6276	6.38067	0.00117101	0.0162477	-0.871401	Il13	interleukin 13 (Il13)	NM_008355	226874824	7	919	GAGGUAG	913	3UTR	0.0443	2		2010005J08Rik	upregulator of cell proliferation (Urgcp)	NM_178623	117938769
mmu-let-7i	1.1365	8.6276	6.38067	0.00117101	0.0162477	-0.871401	Marcksl1	MARCKS-like 1 (Marcksl1)	NM_010807	257467655	7	1048	GAGGUAG	1042	3UTR	0.0443	2		2010011I20Rik	family with sequence similarity 210, member B (Fam210b)	NM_025912	224967101
mmu-let-7i	1.1365	8.6276	6.38067	0.00117101	0.0162477	-0.871401	Numbl	numb-like (Numbl)	NM_010950	87042276	7	2573	UGAGGUA	2567	3UTR	0.0442	1		2010012O05Rik	RIKEN cDNA 2010012O05 gene (2010012O05Rik)	NM_025563	133893035
mmu-let-7i	1.1365	8.6276	6.38067	0.00117101	0.0162477	-0.871401	Slc31a1	solute carrier family 31, member 1 (Slc31a1)	NM_175090	227116312	8	2292	GAGGUAGU	2285	3UTR	0.0442	2		2010107G12Rik	RIKEN cDNA 2010107G12 gene (2010107G12Rik)	NM_001025573	282721099
mmu-let-7i	1.1365	8.6276	6.38067	0.00117101	0.0162477	-0.871401	Fras1	Fraser syndrome 1 homolog (human) (Fras1)	NM_175473	126157514	8	13060	UGAGGUAG	13053	3UTR	0.0441	1		2010109I03Rik	RIKEN cDNA 2010109I03 gene (2010109I03Rik)	NM_025929	114842381
mmu-let-7i	1.1365	8.6276	6.38067	0.00117101	0.0162477	-0.871401	Sec22a	SEC22 vesicle trafficking protein homolog A (S. cerevisiae) (Sec22a)	NM_133704	118130956	8	2858	UGAGGUAG	2851	3UTR	0.0441	1		2010305A19Rik	cytochrome c oxidase assembly factor 7 (Coa7)	NM_027250	146149216
mmu-let-7i	1.1365	8.6276	6.38067	0.00117101	0.0162477	-0.871401	Sod2	superoxide dismutase 2, mitochondrial (Sod2)	NM_013671	76253932	8	1472	UGAGGUAG	1465	3UTR	0.044	1		2010317E24Rik	suppressor APC domain containing 2 (Sapcd2)	NM_001081085	594150364
mmu-let-7i	1.1365	8.6276	6.38067	0.00117101	0.0162477	-0.871401	Xkr8	X Kell blood group precursor related family member 8 homolog (Xkr8)	NM_201368	41235769	8	1778	UGAGGUAG	1771	3UTR	0.044	1		2200002K05Rik	V-set and transmembrane domain containing 5 (Vstm5)	NM_026955	142348823
mmu-let-7i	1.1365	8.6276	6.38067	0.00117101	0.0162477	-0.871401	Mogat2	monoacylglycerol O-acyltransferase 2 (Mogat2)	NM_177448	190610050	7	1748	UGAGGUA	1742	3UTR	0.0439	1		2210010N04Rik	tectonin beta-propeller repeat containing 1 (Tecpr1)	NM_027410	124249057
mmu-let-7i	1.1365	8.6276	6.38067	0.00117101	0.0162477	-0.871401	Cdv3	carnitine deficiency-associated gene expressed in ventricle 3 (Cdv3)	NM_175565	145301557	8	2300	GAGGUAGU	2293	3UTR	0.0437	2		2210016L21Rik	RIKEN cDNA 2210016L21 gene (2210016L21Rik)	NM_028211	39930440
mmu-let-7i	1.1365	8.6276	6.38067	0.00117101	0.0162477	-0.871401	Rnf170	ring finger protein 170 (Rnf170)	NM_029965	111186462	8	3815	UGAGGUAG	3808	3UTR	0.0436	1		2210021J22Rik	cysteine rich, DPF motif domain containing 1 (Cdpf1)	NM_197998	257467491
mmu-let-7i	1.1365	8.6276	6.38067	0.00117101	0.0162477	-0.871401	Ttc22	tetratricopeptide repeat domain 22 (Ttc22)	NM_177667	260436962	7	2453	GAGGUAG	2447	3UTR	0.0435	2		2210023G05Rik	carboxylesterase 2G (Ces2g)	NM_197999	268839830
mmu-let-7i	1.1365	8.6276	6.38067	0.00117101	0.0162477	-0.871401	Hyal1	hyaluronoglucosaminidase 1 (Hyal1)	NM_008317	145966880	7	1855	UGAGGUA	1849	3UTR	0.0432	1		2210415F13Rik	LY6/PLAUR domain containing 8 (Lypd8)	NM_001083884	139949232
mmu-let-7i	1.1365	8.6276	6.38067	0.00117101	0.0162477	-0.871401	Tmed5	transmembrane emp24 protein transport domain containing 5 (Tmed5)	NM_028876	141802491	8	2583	UGAGGUAG	2576	3UTR	0.0432	1		2310001A20Rik	adipocyte plasma membrane associated protein (Apmap)	NM_027977	141802875
mmu-let-7i	1.1365	8.6276	6.38067	0.00117101	0.0162477	-0.871401	Pars2	prolyl-tRNA synthetase (mitochondrial)(putative) (Pars2)	NM_001083887	551411795	7	2997	GAGGUAG	2991	3UTR	0.0431	2		2310007B03Rik	RIKEN cDNA 2310007B03 gene (2310007B03Rik)	NM_172411	229576964
mmu-let-7i	1.1365	8.6276	6.38067	0.00117101	0.0162477	-0.871401	Adamts15	a disintegrin-like and metallopeptidase (reprolysin type) with thrombospondin type 1 motif, 15 (Adamts15)	NM_001024139	71725382	8	4216	UGAGGUAG	4209	3UTR	0.043	1		2310007H09Rik	phospholysine phosphohistidine inorganic pyrophosphate phosphatase (Lhpp)	NM_029609	70778743
mmu-let-7i	1.1365	8.6276	6.38067	0.00117101	0.0162477	-0.871401	Adamts15	a disintegrin-like and metallopeptidase (reprolysin type) with thrombospondin type 1 motif, 15 (Adamts15)	NM_001024139	71725382	8	3266	UGAGGUAG	3259	3UTR	0.043	1		2310008H04Rik	scaffolding protein involved in DNA repair (Spidr)	NM_146068	530233403
mmu-let-7i	1.1365	8.6276	6.38067	0.00117101	0.0162477	-0.871401	Tmem167	transmembrane protein 167 (Tmem167)	NM_025335	225007606	8	3139	UGAGGUAG	3132	3UTR	0.043	1		2310008H09Rik	lysine rich nucleolar protein 1 (Knop1)	NM_023197	269996017
mmu-let-7i	1.1365	8.6276	6.38067	0.00117101	0.0162477	-0.871401	Usp12	ubiquitin specific peptidase 12 (Usp12)	NM_011669	118130069	8	4149	UGAGGUAG	4142	3UTR	0.0428	1		2310008M10Rik	oligosaccharyltransferase complex subunit (Ostc)	NM_025509	294489325
mmu-let-7i	1.1365	8.6276	6.38067	0.00117101	0.0162477	-0.871401	Zfyve16	zinc finger, FYVE domain containing 16 (Zfyve16)	NM_173392	158508682	7	5218	GAGGUAG	5212	3UTR	0.0426	2		2310011J03Rik	RIKEN cDNA 2310011J03 gene (2310011J03Rik)	NM_025521	114051827
mmu-let-7i	1.1365	8.6276	6.38067	0.00117101	0.0162477	-0.871401	Wdr37	WD repeat domain 37 (Wdr37)	NM_001039388	550822177	8	2686	GAGGUAGU	2679	3UTR	0.0425	2		2310014L17Rik	RIKEN cDNA 2310014L17 gene (2310014L17Rik)	NM_029809	270483767
mmu-let-7i	1.1365	8.6276	6.38067	0.00117101	0.0162477	-0.871401	Adrb2	adrenergic receptor, beta 2 (Adrb2)	NM_007420	480306395	7	1783	GAGGUAG	1777	3UTR	0.0424	2		2310016E02Rik	oligosaccharyltransferase 4 homolog (S. cerevisiae) (Ost4)	NM_024460	556503816
mmu-let-7i	1.1365	8.6276	6.38067	0.00117101	0.0162477	-0.871401	Gsdmc1	gasdermin C (Gsdmc)	NM_031378	142381263	7	2032	GAGGUAG	2026	3UTR	0.0422	2		2310022M17Rik	biorientation of chromosomes in cell division 1 (Bod1)	NM_001024919	67906186
mmu-let-7i	1.1365	8.6276	6.38067	0.00117101	0.0162477	-0.871401	Ikbke	inhibitor of kappaB kinase epsilon (Ikbke)	NM_019777	142379783	7	2613	GAGGUAG	2607	3UTR	0.042	2		2310039E09Rik	muscle-related coiled-coil protein (Murc)	NM_026509	225543547
mmu-let-7i	1.1365	8.6276	6.38067	0.00117101	0.0162477	-0.871401	Erlin2	ER lipid raft associated 2 (Erlin2)	NM_153592	359279933	8	2294	UGAGGUAG	2287	3UTR	0.0419	1		2310040C09Rik	family with sequence similarity 83, member G (Fam83g)	NM_178618	117647254
mmu-let-7i	1.1365	8.6276	6.38067	0.00117101	0.0162477	-0.871401	Il10	interleukin 10 (Il10)	NM_010548	291575143	7	762	UGAGGUA	756	3UTR	0.0419	1		2310047M10Rik	RIKEN cDNA 2310047M10 gene (2310047M10Rik)	NM_028005	142369094
mmu-let-7i	1.1365	8.6276	6.38067	0.00117101	0.0162477	-0.871401	Suv39h2	suppressor of variegation 3-9 homolog 2 (Drosophila) (Suv39h2)	NM_022724	227430368	8	4206	UGAGGUAG	4199	3UTR	0.0419	1		2310051M13Rik	cathepsin L-like 3 (Ctsll3)	NM_027344	142367151
mmu-let-7i	1.1365	8.6276	6.38067	0.00117101	0.0162477	-0.871401	Zscan12	zinc finger and SCAN domain containing 12 (Zscan12)	NM_016684	134032036	8	1849	UGAGGUAG	1842	3UTR	0.0419	1		2310067B10Rik	RIKEN cDNA 2310067B10 gene (2310067B10Rik)	NM_028014	112421147
mmu-let-7i	1.1365	8.6276	6.38067	0.00117101	0.0162477	-0.871401	Dera	2-deoxyribose-5-phosphate aldolase homolog (C. elegans) (Dera)	NM_172733	27777676	7	1474	GAGGUAG	1468	3UTR	0.0418	2		2310079N02Rik	nucleoside-triphosphatase, cancer-related (Ntpcr)	NM_025636	229576858
mmu-let-7i	1.1365	8.6276	6.38067	0.00117101	0.0162477	-0.871401	Dusp1	dual specificity phosphatase 1 (Dusp1)	NM_013642	219521883	7	1720	UGAGGUA	1714	3UTR	0.0418	1		2410002I01Rik	ENTH domain containing 2 (Enthd2)	NM_183137	118130816
mmu-let-7i	1.1365	8.6276	6.38067	0.00117101	0.0162477	-0.871401	V1rc15	vomeronasal 1 receptor 32 (Vmn1r32)	NM_134170	142381477	7	2392	UGAGGUA	2386	3UTR	0.0418	1		2410004A20Rik	KH domain containing 3, subcortical maternal complex member (Khdc3)	NM_025890	164663839
mmu-let-7i	1.1365	8.6276	6.38067	0.00117101	0.0162477	-0.871401	Lin28	lin-28 homolog A (C. elegans) (Lin28a)	NM_145833	22003877	8	1620	GAGGUAGU	1613	3UTR	0.0415	2		2410004L22Rik	4HAUS augmin-like complex, subunit 8 (Haus8)	NM_029621	251823892
mmu-let-7i	1.1365	8.6276	6.38067	0.00117101	0.0162477	-0.871401	Rpl18a	ribosomal protein L18A (Rpl18a)	NM_029751	162135967	7	1177	GAGGUAG	1171	3UTR	0.0414	2		2410008K03Rik	GATS protein-like 3 (Gatsl3)	NM_028022	58037268
mmu-let-7i	1.1365	8.6276	6.38067	0.00117101	0.0162477	-0.871401	Txn2	thioredoxin 2 (Txn2)	NM_019913	146134885	7	1133	GAGGUAG	1127	3UTR	0.0414	2		2410016O06Rik	RIKEN cDNA 2410016O06 gene (2410016O06Rik)	NM_023633	257743020
mmu-let-7i	1.1365	8.6276	6.38067	0.00117101	0.0162477	-0.871401	Doc2a	double C2, alpha (Doc2a)	NM_010069	33859539	7	2358	GAGGUAG	2352	3UTR	0.0411	2		2410018C20Rik	methylthioribose-1-phosphate isomerase homolog (S. cerevisiae) (Mri1)	NM_026423	268838019
mmu-let-7i	1.1365	8.6276	6.38067	0.00117101	0.0162477	-0.871401	Ccdc130	coiled-coil domain containing 130 (Ccdc130)	NM_026350	659928101	7	2097	GAGGUAG	2091	3UTR	0.041	2		2410042D21Rik	katanin p80 subunit B like 1 (Katnbl1)	NM_024254	133893139
mmu-let-7i	1.1365	8.6276	6.38067	0.00117101	0.0162477	-0.871401	Pacs2	phosphofurin acidic cluster sorting protein 2 (Pacs2)	NM_001081170	124487180	8	4724	UGAGGUAG	4717	3UTR	0.041	1		2410166I05Rik	mitochondrial fission regulator 1-like (Mtfr1l)	NM_029759	368711321
mmu-let-7i	1.1365	8.6276	6.38067	0.00117101	0.0162477	-0.871401	Slc26a1	solute carrier family 26 (sulfate transporter)	NM_174870	170650676	7	2758	GAGGUAG	2752	3UTR	0.0409	2		2510003E04Rik	RIKEN cDNA 2510003E04 gene (2510003E04Rik)	NM_028197	72384370
mmu-let-7i	1.1365	8.6276	6.38067	0.00117101	0.0162477	-0.871401	Ppt2	palmitoyl-protein thioesterase 2 (Ppt2)	NM_019441	698980055	7	1207	GAGGUAG	1201	3UTR	0.0408	2		2510006D16Rik	transmembrane protein 234 (Tmem234)	NM_029748	141802797
mmu-let-7i	1.1365	8.6276	6.38067	0.00117101	0.0162477	-0.871401	1110054O05Rik	INTS3 and NABP interacting protein (Inip)	NM_001013577	62526127	8	2330	UGAGGUAG	2323	3UTR	0.0407	1		2510009E07Rik	RIKEN cDNA 2510009E07 gene (2510009E07Rik)	NM_001001881	226823230
mmu-let-7i	1.1365	8.6276	6.38067	0.00117101	0.0162477	-0.871401	Polr3d	polymerase (RNA) III (DNA directed) polypeptide D (Polr3d)	NM_025945	256225459	7	1803	GAGGUAG	1797	3UTR	0.0407	2		2610008E11Rik	RIKEN cDNA 2610008E11 gene (2610008E11Rik)	NM_001004362	291621712
mmu-let-7i	1.1365	8.6276	6.38067	0.00117101	0.0162477	-0.871401	1110039B18Rik	transmembrane protein 214 (Tmem214)	NM_144525	142353473	7	2548	UGAGGUA	2542	3UTR	0.0405	1		2610019A05Rik	STE20-related kinase adaptor alpha (Strada)	NM_028126	356995840
mmu-let-7i	1.1365	8.6276	6.38067	0.00117101	0.0162477	-0.871401	Pigw	phosphatidylinositol glycan anchor biosynthesis, class W (Pigw)	NM_001077636	117647260	7	2047	UGAGGUA	2041	3UTR	0.0405	1		2610021K21Rik	EF-hand calcium binding domain 11 (Efcab11)	NM_030172	118130699
mmu-let-7i	1.1365	8.6276	6.38067	0.00117101	0.0162477	-0.871401	Jmjd1a	lysine (K)-specific demethylase 3A (Kdm3a)	NM_173001	557878655	7	4283	UGAGGUA	4277	3UTR	0.0404	1		2610027L16Rik	NOP9 nucleolar protein (Nop9)	NM_026403	169646351
mmu-let-7i	1.1365	8.6276	6.38067	0.00117101	0.0162477	-0.871401	Nup62	nucleoporin 62 (Nup62)	NM_053074	16716348	7	2157	GAGGUAG	2151	3UTR	0.0404	2		2610028H24Rik	RIKEN cDNA 2610028H24 gene (2610028H24Rik)	NM_029816	158534072
mmu-let-7i	1.1365	8.6276	6.38067	0.00117101	0.0162477	-0.871401	Pdzd3	PDZ domain containing 3 (Pdzd3)	NM_133226	153791850	7	1691	GAGGUAG	1685	3UTR	0.0404	2		2610036D13Rik	TELO2 interacting protein 1 (Tti1)	NM_029282	33859731
mmu-let-7i	1.1365	8.6276	6.38067	0.00117101	0.0162477	-0.871401	Pcgf3	polycomb group ring finger 3 (Pcgf3)	NM_172716	146198689	8	2664	UGAGGUAG	2657	3UTR	0.0403	1		2610036L11Rik	centromere protein W (Cenpw)	NM_001109747	157909785
mmu-let-7i	1.1365	8.6276	6.38067	0.00117101	0.0162477	-0.871401	Ddb1	damage specific DNA binding protein 1 (Ddb1)	NM_015735	7657010	7	3853	UGAGGUA	3847	3UTR	0.0399	1		2610209A20Rik	lipoyl(octanoyl) transferase 2 (putative) (Lipt2)	NM_026010	229577003
mmu-let-7i	1.1365	8.6276	6.38067	0.00117101	0.0162477	-0.871401	Ddost	dolichyl-di-phosphooligosaccharide-protein glycotransferase (Ddost)	NM_007838	46195797	7	1574	UGAGGUA	1568	3UTR	0.0399	1		2610507B11Rik	RIKEN cDNA 2610507B11 gene (2610507B11Rik)	NM_001002004	262118186
mmu-let-7i	1.1365	8.6276	6.38067	0.00117101	0.0162477	-0.871401	Tm6sf1	transmembrane 6 superfamily member 1 (Tm6sf1)	NM_145375	602617426	7	1554	UGAGGUA	1548	3UTR	0.0396	1		2610528E23Rik	cms small ribosomal subunit 1 (Cmss1)	NM_025599	165932363
mmu-let-7i	1.1365	8.6276	6.38067	0.00117101	0.0162477	-0.871401	Ppapdc1b	phosphatidic acid phosphatase type 2 domain containing 1B (Ppapdc1b)	NM_028000	124487351	7	838	GAGGUAG	832	3UTR	0.0395	2		2700007P21Rik	ADP-ribosylation factor-like 14 effector protein (Arl14ep)	NM_001025102	68299773
mmu-let-7i	1.1365	8.6276	6.38067	0.00117101	0.0162477	-0.871401	Serf2	small EDRK-rich factor 2 (Serf2)	NM_011354	595759124	8	2507	UGAGGUAG	2500	3UTR	0.0395	1		2700050L05Rik	erythroid differentiation regulatory factor 1 (Edrf1)	NM_178115	295389568
mmu-let-7i	1.1365	8.6276	6.38067	0.00117101	0.0162477	-0.871401	Tspan18	tetraspanin 18 (Tspan18)	NM_183180	158749630	8	1999	GAGGUAGU	1992	3UTR	0.0394	2		2700078K21Rik	MOB kinase activator 2 (Mob2)	NM_028308	118130484
mmu-let-7i	1.1365	8.6276	6.38067	0.00117101	0.0162477	-0.871401	4921533L14Rik	family with sequence similarity 135, member A (Fam135a)	NM_026604	229577387	7	4969	UGAGGUA	4963	3UTR	0.0392	1		2810002I04Rik	zinc finger, C2HC-type containing 1C (Zc2hc1c)	NM_172414	268370212
mmu-let-7i	1.1365	8.6276	6.38067	0.00117101	0.0162477	-0.871401	Neurog3	neurogenin 3 (Neurog3)	NM_009719	157267375	7	1269	UGAGGUA	1263	3UTR	0.0392	1		2810008M24Rik	small integral membrane protein 15 (Smim15)	NM_001048250	142350660
mmu-let-7i	1.1365	8.6276	6.38067	0.00117101	0.0162477	-0.871401	Trpc7	transient receptor potential cation channel, subfamily C, member 7 (Trpc7)	NM_012035	697663106	7	3335	UGAGGUA	3329	3UTR	0.0392	1		2810012G03Rik	family with sequence similarity 53, member C (Fam53c)	NM_175104	118129841
mmu-let-7i	1.1365	8.6276	6.38067	0.00117101	0.0162477	-0.871401	Frem2	Fras1 related extracellular matrix protein 2 (Frem2)	NM_172862	110815845	8	11853	UGAGGUAG	11846	3UTR	0.0391	1		2810021B07Rik	M-phase specific PLK1 intereacting protein (Mplkip)	NM_025479	158508638
mmu-let-7i	1.1365	8.6276	6.38067	0.00117101	0.0162477	-0.871401	Kctd17	potassium channel tetramerisation domain containing 17	NM_001081367	124486940	7	1179	GAGGUAG	1173	3UTR	0.0391	2		2810022L02Rik	spermatogenesis associated, serine-rich 2-like (Spats2l)	NM_144882	257096025
mmu-let-7i	1.1365	8.6276	6.38067	0.00117101	0.0162477	-0.871401	Cdh22	cadherin 22 (Cdh22)	NM_174988	164698423	7	3491	GAGGUAG	3485	3UTR	0.039	2		2810407C02Rik	selenoprotein T (Selt)	NM_001040396	143770877
mmu-let-7i	1.1365	8.6276	6.38067	0.00117101	0.0162477	-0.871401	Hkdc1	hexokinase domain containing 1 (Hkdc1)	NM_145419	21703835	7	3114	GAGGUAG	3108	3UTR	0.039	2		2810410C14Rik	cytochrome b5 reductase-like (Cyb5rl)	NM_175471	31341983
mmu-let-7i	1.1365	8.6276	6.38067	0.00117101	0.0162477	-0.871401	Cldn12	claudin 12 (Cldn12)	NM_022890	255958179	8	1553	UGAGGUAG	1546	3UTR	0.0389	1		2810432L12Rik	transmembrane protein 246 (Tmem246)	NM_025944	197116390
mmu-let-7i	1.1365	8.6276	6.38067	0.00117101	0.0162477	-0.871401	Klhdc8b	kelch domain containing 8B (Klhdc8b)	NM_030075	274317582	7	2896	GAGGUAG	2890	3UTR	0.0389	2		2810452K22Rik	cyclin-dependent kinase 2 interacting protein (Cinp)	NM_026048	323462190
mmu-let-7i	1.1365	8.6276	6.38067	0.00117101	0.0162477	-0.871401	Rasgrp1	RAS guanyl releasing protein 1 (Rasgrp1)	NM_011246	40254575	8	3051	UGAGGUAG	3044	3UTR	0.0389	1		3110032G18Rik	family with sequence similarity 101, member A (Fam101a)	NM_028443	142358197
mmu-let-7i	1.1365	8.6276	6.38067	0.00117101	0.0162477	-0.871401	Armc8	armadillo repeat containing 8 (Armc8)	NM_028768	260763996	7	2703	UGAGGUA	2697	3UTR	0.0388	1		3110048E14Rik	family with sequence similarity 118, member A (Fam118a)	NM_133750	226051884
mmu-let-7i	1.1365	8.6276	6.38067	0.00117101	0.0162477	-0.871401	Tuba4a	tubulin, alpha 4A (Tuba4a)	NM_009447	142387233	7	1541	GAGGUAG	1535	3UTR	0.0388	2		3110049J23Rik	phenazine biosynthesis-like protein domain containing 2 (Pbld2)	NM_026085	142388988
mmu-let-7i	1.1365	8.6276	6.38067	0.00117101	0.0162477	-0.871401	Golga4	golgi autoantigen, golgin subfamily a, 4 (Golga4)	NM_018748	118130754	7	7383	UGAGGUA	7377	3UTR	0.0387	1		3110050N22Rik	zinc finger, C2HC-type containing 1A (Zc2hc1a)	NM_173181	119637813
mmu-let-7i	1.1365	8.6276	6.38067	0.00117101	0.0162477	-0.871401	Snai3	snail family zinc finger 3 (Snai3)	NM_013914	31560481	7	1315	GAGGUAG	1309	3UTR	0.0387	2		3110056O03Rik	signal peptide peptidase like 2B (Sppl2b)	NM_175195	116805337
mmu-let-7i	1.1365	8.6276	6.38067	0.00117101	0.0162477	-0.871401	Npc2	Niemann-Pick type C2 (Npc2)	NM_023409	86198336	8	2208	UGAGGUAG	2201	3UTR	0.0386	1		3200002M19Rik	anaphase prompoting complex C subunit 15 (Anapc15)	NM_027532	606215135
mmu-let-7i	1.1365	8.6276	6.38067	0.00117101	0.0162477	-0.871401	Ptk6	PTK6 protein tyrosine kinase 6 (Ptk6)	NM_009184	133893003	7	1767	UGAGGUA	1761	3UTR	0.0386	1		3321401G04Rik	family with sequence similarity 115, member A (Fam115a)	NM_029930	141801726
mmu-let-7i	1.1365	8.6276	6.38067	0.00117101	0.0162477	-0.871401	Dmd	dystrophin, muscular dystrophy (Dmd)	NM_007868	183396799	8	13131	UGAGGUAG	13124	3UTR	0.0385	1		3830403N18Rik	RIKEN cDNA 3830403N18 gene (3830403N18Rik)	NM_027510	141803393
mmu-let-7i	1.1365	8.6276	6.38067	0.00117101	0.0162477	-0.871401	Dock3	dedicator of cyto-kinesis 3 (Dock3)	NM_153413	148277095	8	7447	GAGGUAGU	7440	3UTR	0.0385	2		3830406C13Rik	RIKEN cDNA 3830406C13 gene (3830406C13Rik)	NM_178141	548923787
mmu-let-7i	1.1365	8.6276	6.38067	0.00117101	0.0162477	-0.871401	5730577I03Rik	RIKEN cDNA 5730577I03 gene	NM_175110	160333674	7	1325	GAGGUAG	1319	3UTR	0.0384	2		4432412L15Rik	paralemmin 3 (Palm3)	NM_028877	124430706
mmu-let-7i	1.1365	8.6276	6.38067	0.00117101	0.0162477	-0.871401	Tgds	TDP-glucose 4,6-dehydratase (Tgds)	NM_029578	225579051	7	1139	GAGGUAG	1133	3UTR	0.0384	2		4631426J05Rik	carbohydrate (N-acetylgalactosamine 4-sulfate 6-O) sulfotransferase 15 (Chst15)	NM_029935	158508649
mmu-let-7i	1.1365	8.6276	6.38067	0.00117101	0.0162477	-0.871401	Adamts8	a disintegrin-like and metallopeptidase (reprolysin type) with thrombospondin type 1 motif, 8 (Adamts8)	NM_013906	117647242	7	3367	GAGGUAG	3361	3UTR	0.0383	2		4632411B12Rik	KAT8 regulatory NSL complex subunit 3 (Kansl3)	NM_172652	146198789
mmu-let-7i	1.1365	8.6276	6.38067	0.00117101	0.0162477	-0.871401	Esrrb	estrogen related receptor, beta (Esrrb)	NM_011934	226958364	8	2260	UGAGGUAG	2253	3UTR	0.0383	1		4732418C07Rik	EF-hand calcium binding domain 14 (Efcab14)	NM_172698	40254241
mmu-let-7i	1.1365	8.6276	6.38067	0.00117101	0.0162477	-0.871401	Zfp583	zinc finger protein 583 (Zfp583)	NM_001033249	162287407	7	2667	GAGGUAG	2661	3UTR	0.0383	2		4832428D23Rik	methyltransferase like 21E (Mettl21e)	NM_207281	146198803
mmu-let-7i	1.1365	8.6276	6.38067	0.00117101	0.0162477	-0.871401	B3gnt1	UDP-GlcNAc:betaGal beta-1,3-N-acetylglucosaminyltransferase 1 (B3gnt1)	NM_175383	92110030	7	1640	GAGGUAG	1634	3UTR	0.0381	2		4833409A17Rik	pyridine nucleotide-disulphide oxidoreductase domain 2 (Pyroxd2)	NM_029011	125858597
mmu-let-7i	1.1365	8.6276	6.38067	0.00117101	0.0162477	-0.871401	Cd200r1	CD200 receptor 1 (Cd200r1)	NM_021325	158631181	7	1780	GAGGUAG	1774	3UTR	0.0381	2		4833424O15Rik	lipid phosphate phosphatase-related protein type 5 (Lppr5)	NM_029425	167466193
mmu-let-7i	1.1365	8.6276	6.38067	0.00117101	0.0162477	-0.871401	E2f7	E2F transcription factor 7 (E2f7)	NM_178609	115270983	8	5099	UGAGGUAG	5092	3UTR	0.0381	1		4833426J09Rik	pyruvate dehyrogenase phosphatase catalytic subunit 2 (Pdp2)	NM_001024606	66841377
mmu-let-7i	1.1365	8.6276	6.38067	0.00117101	0.0162477	-0.871401	St6gal1	beta galactoside alpha 2,6 sialyltransferase 1 (St6gal1)	NM_145933	357430775	8	3651	UGAGGUAG	3644	3UTR	0.0378	1		4921505C17Rik	RPTOR independent companion of MTOR, complex 2 (Rictor)	NM_030168	168480119
mmu-let-7i	1.1365	8.6276	6.38067	0.00117101	0.0162477	-0.871401	Adamtsl4	ADAMTS-like 4 (Adamtsl4)	NM_144899	678246466	7	3652	GAGGUAG	3646	3UTR	0.0377	2		4921506J03Rik	ataxin 7-like 3B (Atxn7l3b)	NM_001033474	113930746
mmu-let-7i	1.1365	8.6276	6.38067	0.00117101	0.0162477	-0.871401	Zcchc11	zinc finger, CCHC domain containing 11 (Zcchc11)	NM_175472	83977460	7	5478	UGAGGUA	5472	3UTR	0.0377	1		4921507P07Rik	RIKEN cDNA 4921507P07 gene (4921507P07Rik)	NM_027564	146141212
mmu-let-7i	1.1365	8.6276	6.38067	0.00117101	0.0162477	-0.871401	Crb3	crumbs homolog 3 (Drosophila) (Crb3)	NM_177638	118130453	7	780	UGAGGUA	774	3UTR	0.0373	1		4921516M08Rik	adenylate kinase isoenzyme 6 (Ak6)	NM_027592	549806814
mmu-let-7i	1.1365	8.6276	6.38067	0.00117101	0.0162477	-0.871401	Crb3	crumbs homolog 3 (Drosophila) (Crb3)	NM_177638	118130453	7	711	GAGGUAG	705	3UTR	0.0373	2		4921517D22Rik	RIKEN cDNA 4921517D22 gene (4921517D22Rik)	NM_183290	110347499
mmu-let-7i	1.1365	8.6276	6.38067	0.00117101	0.0162477	-0.871401	Rfxdc1	regulatory factor X, 6 (Rfx6)	NM_177306	142348304	7	2894	GAGGUAG	2888	3UTR	0.0373	2		4921533L14Rik	family with sequence similarity 135, member A (Fam135a)	NM_026604	229577387
mmu-let-7i	1.1365	8.6276	6.38067	0.00117101	0.0162477	-0.871401	Hmgcll1	3-hydroxymethyl-3-methylglutaryl-Coenzyme A lyase-like 1 (Hmgcll1)	NM_173731	118130046	8	2965	UGAGGUAG	2958	3UTR	0.0372	1		4930453N24Rik	RIKEN cDNA 4930453N24 gene (4930453N24Rik)	NM_026273	141801722
mmu-let-7i	1.1365	8.6276	6.38067	0.00117101	0.0162477	-0.871401	Nid2	nidogen 2 (Nid2)	NM_008695	84370360	7	4462	UGAGGUA	4456	3UTR	0.0371	1		4930455C21Rik	translocase of inner mitochondrial membrane domain containing 1 (Timmdc1)	NM_024273	225543443
mmu-let-7i	1.1365	8.6276	6.38067	0.00117101	0.0162477	-0.871401	Ccnj	cyclin J (Ccnj)	NM_172839	158533992	8	3191	GAGGUAGU	3184	3UTR	0.037	2		4930521A18Rik	PIH1 domain containing 3 (Pih1d3)	NM_029062	113461993
mmu-let-7i	1.1365	8.6276	6.38067	0.00117101	0.0162477	-0.871401	Gpx7	glutathione peroxidase 7 (Gpx7)	NM_024198	142366038	7	882	UGAGGUA	876	3UTR	0.037	1		4930524B15Rik	RIKEN cDNA 4930524B15 gene (4930524B15Rik)	NM_026262	13385771
mmu-let-7i	1.1365	8.6276	6.38067	0.00117101	0.0162477	-0.871401	Pax3	paired box 3 (Pax3)	NM_008781	226958471	7	3201	UGAGGUA	3195	3UTR	0.0369	1		4930539E08Rik	RIKEN cDNA 4930539E08 gene (4930539E08Rik)	NM_172450	146149258
mmu-let-7i	1.1365	8.6276	6.38067	0.00117101	0.0162477	-0.871401	AK220484	growth regulation by estrogen in breast cancer-like (Greb1l)	NM_001083628	134947987	8	8318	UGAGGUAG	8311	3UTR	0.0368	1		4930547N16Rik	PARP1 binding protein (Parpbp)	NM_029249	126215543
mmu-let-7i	1.1365	8.6276	6.38067	0.00117101	0.0162477	-0.871401	Gyk	glycerol kinase (Gyk)	NM_212444	95147349	8	3947	UGAGGUAG	3940	3UTR	0.0367	1		4930550C14Rik	RIKEN cDNA 4930550C14 gene (4930550C14Rik)	NM_029247	146141155
mmu-let-7i	1.1365	8.6276	6.38067	0.00117101	0.0162477	-0.871401	Os9	amplified in osteosarcoma (Os9)	NM_177614	283837906	7	2230	GAGGUAG	2224	3UTR	0.0366	2		4930562D19Rik	coiled-coil domain containing 157 (Ccdc157)	NM_177616	114145527
mmu-let-7i	1.1365	8.6276	6.38067	0.00117101	0.0162477	-0.871401	Frmd5	FERM domain containing 5 (Frmd5)	NM_172673	115298679	8	3546	UGAGGUAG	3539	3UTR	0.0365	1		4930563D23Rik	RIKEN cDNA 4930563D23 gene (4930563D23Rik)	NM_029252	113461978
mmu-let-7i	1.1365	8.6276	6.38067	0.00117101	0.0162477	-0.871401	Slfn1	schlafen 1 (Slfn1)	NM_011407	6755567	7	1448	UGAGGUA	1442	3UTR	0.0365	1		4930578C19Rik	RIKEN cDNA 4930578C19 gene (4930578C19Rik)	NM_175228	142347804
mmu-let-7i	1.1365	8.6276	6.38067	0.00117101	0.0162477	-0.871401	Olr1	oxidized low density lipoprotein (lectin-like) receptor 1 (Olr1)	NM_138648	134053880	8	1498	UGAGGUAG	1491	3UTR	0.0364	1		4931406C07Rik	RIKEN cDNA 4931406C07 gene (4931406C07Rik)	NM_133732	313747469
mmu-let-7i	1.1365	8.6276	6.38067	0.00117101	0.0162477	-0.871401	E2f5	E2F transcription factor 5 (E2f5)	NM_007892	31982404	7	1190	GAGGUAG	1184	3UTR	0.0363	2		4931408C20Rik	RIKEN cDNA 4931408C20 gene (4931408C20Rik)	NM_001033764	237757315
mmu-let-7i	1.1365	8.6276	6.38067	0.00117101	0.0162477	-0.871401	Ikzf5	myotubularin related protein 14 (Mtmr14)	NM_026849	163937862	7	2242	GAGGUAG	2236	3UTR	0.0363	2		4931428F04Rik	RIKEN cDNA 4931428F04 gene (4931428F04Rik)	NM_028888	261862285
mmu-let-7i	1.1365	8.6276	6.38067	0.00117101	0.0162477	-0.871401	Slc2a8	solute carrier family 2, (facilitated glucose transporter)	NM_019488	118130693	7	1827	UGAGGUA	1821	3UTR	0.0363	1		4931429I11Rik	RIKEN cDNA 4931429I11 gene (4931429I11Rik)	NM_001081121	124487448
mmu-let-7i	1.1365	8.6276	6.38067	0.00117101	0.0162477	-0.871401	Dagla	diacylglycerol lipase, alpha (Dagla)	NM_198114	154091035	8	3399	UGAGGUAG	3392	3UTR	0.0362	1		4932411E22Rik	RIKEN cDNA 4932411E22 gene (4932411E22Rik)	NM_172534	141803578
mmu-let-7i	1.1365	8.6276	6.38067	0.00117101	0.0162477	-0.871401	Fbxl12	F-box and leucine-rich repeat protein 12 (Fbxl12)	NM_013911	557440728	7	1732	GAGGUAG	1726	3UTR	0.036	2		4932417H02Rik	regulatory associated protein of MTOR, complex 1 (Rptor)	NM_028898	154146248
mmu-let-7i	1.1365	8.6276	6.38067	0.00117101	0.0162477	-0.871401	Masp1	mannan-binding lectin serine peptidase 1 (Masp1)	NM_008555	148226523	7	2441	GAGGUAG	2435	3UTR	0.0358	2		4933404M02Rik	glutamate rich 2 (Erich2)	NM_025744	124244076
mmu-let-7i	1.1365	8.6276	6.38067	0.00117101	0.0162477	-0.871401	Rdh12	retinol dehydrogenase 12 (Rdh12)	NM_030017	146149111	7	1643	UGAGGUA	1637	3UTR	0.0357	1		4933407P14Rik	signal peptide peptidase 2C (Sppl2c)	NM_001082535	126722668
mmu-let-7i	1.1365	8.6276	6.38067	0.00117101	0.0162477	-0.871401	Msra	methionine sulfoxide reductase A (Msra)	NM_026322	358679357	7	1638	UGAGGUA	1632	3UTR	0.0356	1		4933417O08Rik	golgi autoantigen, golgin subfamily a, 7B (Golga7b)	NM_027694	213972647
mmu-let-7i	1.1365	8.6276	6.38067	0.00117101	0.0162477	-0.871401	Rgs11	regulator of G-protein signaling 11 (Rgs11)	NM_001081069	124486717	7	1437	UGAGGUA	1431	3UTR	0.0356	1		4933425O20Rik	transmembrane 239 (Tmem239)	NM_025753	141801888
mmu-let-7i	1.1365	8.6276	6.38067	0.00117101	0.0162477	-0.871401	Arl4d	ADP-ribosylation factor-like 4D (Arl4d)	NM_025404	156713453	7	1051	GAGGUAG	1045	3UTR	0.0355	2		4933426M11Rik	RIKEN cDNA 4933426M11 gene (4933426M11Rik)	NM_178682	334848143
mmu-let-7i	1.1365	8.6276	6.38067	0.00117101	0.0162477	-0.871401	Arl4d	ADP-ribosylation factor-like 4D (Arl4d)	NM_025404	156713453	7	1044	GAGGUAG	1038	3UTR	0.0355	2		4933439F18Rik	GID complex subunit 4, VID24 homolog (S. cerevisiae) (Gid4)	NM_025757	254939695
mmu-let-7i	1.1365	8.6276	6.38067	0.00117101	0.0162477	-0.871401	Slc28a2	solute carrier family 28 (sodium-coupled nucleoside transporter)	NM_172980	142365483	7	3720	UGAGGUA	3714	3UTR	0.0355	1		5330417C22Rik	RIKEN cDNA 5330417C22 gene (5330417C22Rik)	NM_001033304	85701809
mmu-let-7i	1.1365	8.6276	6.38067	0.00117101	0.0162477	-0.871401	5830404H04Rik	C2 calcium-dependent domain containing 2 (C2cd2)	NM_174847	225543529	7	4168	GAGGUAG	4162	3UTR	0.0354	2		5330431N19Rik	deleted in primary ciliary dyskinesia (Dpcd)	NM_172639	142363411
mmu-let-7i	1.1365	8.6276	6.38067	0.00117101	0.0162477	-0.871401	5830404H04Rik	C2 calcium-dependent domain containing 2 (C2cd2)	NM_174847	225543529	7	2863	GAGGUAG	2857	3UTR	0.0354	2		5330437I02Rik	O-acyltransferase like (Oacyl)	NM_177028	118130333
mmu-let-7i	1.1365	8.6276	6.38067	0.00117101	0.0162477	-0.871401	OTTMUSG00000015615	predicted gene 14085 (Gm14085)	NM_001085518	147901769	7	3558	UGAGGUA	3552	3UTR	0.0354	1		5630401D24Rik	methyltransferase like 13 (Mettl13)	NM_144877	21536261
mmu-let-7i	1.1365	8.6276	6.38067	0.00117101	0.0162477	-0.871401	Smug1	single-strand selective monofunctional uracil DNA glycosylase (Smug1)	NM_027885	133892229	8	1604	UGAGGUAG	1597	3UTR	0.0354	1		5730409G15Rik	family with sequence similarity 86 (Fam86)	NM_027446	141803575
mmu-let-7i	1.1365	8.6276	6.38067	0.00117101	0.0162477	-0.871401	Thrsp	thyroid hormone responsive (Thrsp)	NM_009381	31560631	7	821	GAGGUAG	815	3UTR	0.0354	2		5730427N09Rik	NSA2 ribosome biogenesis homolog (S. cerevisiae) (Nsa2)	NM_021552	225690527
mmu-let-7i	1.1365	8.6276	6.38067	0.00117101	0.0162477	-0.871401	Tmem115	transmembrane protein 115 (Tmem115)	NM_019704	118130595	7	1838	UGAGGUA	1832	3UTR	0.0354	1		5730453I16Rik	cleavage and polyadenylation specific factor 7 (Cpsf7)	NM_172302	256665242
mmu-let-7i	1.1365	8.6276	6.38067	0.00117101	0.0162477	-0.871401	Limk2	LIM motif-containing protein kinase 2 (Limk2)	NM_010718	549806770	8	3724	UGAGGUAG	3717	3UTR	0.0353	1		5730472N09Rik	family with sequence similarity 73, member B (Fam73b)	NM_175392	31982182
mmu-let-7i	1.1365	8.6276	6.38067	0.00117101	0.0162477	-0.871401	Slc16a14	solute carrier family 16 (monocarboxylic acid transporters)	NM_027921	41281605	7	1820	GAGGUAG	1814	3UTR	0.0352	2		5730528L13Rik	Myb/SANT-like DNA-binding domain containing 3 (Msantd3)	NM_028137	225543533
mmu-let-7i	1.1365	8.6276	6.38067	0.00117101	0.0162477	-0.871401	Ing3	inhibitor of growth family, member 3 (Ing3)	NM_023626	139948755	8	3534	GAGGUAGU	3527	3UTR	0.035	2		5730536A07Rik	family with sequence similarity 96, member A (Fam96a)	NM_026635	71773979
mmu-let-7i	1.1365	8.6276	6.38067	0.00117101	0.0162477	-0.871401	Kremen2	kringle containing transmembrane protein 2 (Kremen2)	NM_028416	271397582	7	1643	GAGGUAG	1637	3UTR	0.0348	2		5730557B15Rik	ankyrin repeat domain 33B (Ankrd33b)	NM_027496	256600245
mmu-let-7i	1.1365	8.6276	6.38067	0.00117101	0.0162477	-0.871401	Cyp46a1	cytochrome P450, family 46, subfamily a, polypeptide 1 (Cyp46a1)	NM_010010	6753589	7	1951	GAGGUAG	1945	3UTR	0.0347	2		5730577I03Rik	RIKEN cDNA 5730577I03 gene	NM_175110	160333674
mmu-let-7i	1.1365	8.6276	6.38067	0.00117101	0.0162477	-0.871401	Dgat2l4	acyl-CoA wax alcohol acyltransferase 2 (Awat2)	NM_177746	594150398	7	1544	UGAGGUA	1538	3UTR	0.0347	1		5830404H04Rik	C2 calcium-dependent domain containing 2 (C2cd2)	NM_174847	225543529
mmu-let-7i	1.1365	8.6276	6.38067	0.00117101	0.0162477	-0.871401	Fgf4	fibroblast growth factor 4 (Fgf4)	NM_010202	158508679	8	1668	UGAGGUAG	1661	3UTR	0.0345	1		5830411N06Rik	RIKEN cDNA 5830411N06 gene (5830411N06Rik)	NM_175533	142352147
mmu-let-7i	1.1365	8.6276	6.38067	0.00117101	0.0162477	-0.871401	Lass4	ceramide synthase 4 (Cers4)	NM_026058	165972324	8	1463	UGAGGUAG	1456	3UTR	0.0345	1		5830415L20Rik	family with sequence similarity 133, member B (Fam133b)	NM_001042501	109948294
mmu-let-7i	1.1365	8.6276	6.38067	0.00117101	0.0162477	-0.871401	Dhx57	DEAH (Asp-Glu-Ala-Asp/His) box polypeptide 57 (Dhx57)	NM_198942	254939650	7	4501	GAGGUAG	4495	3UTR	0.0343	2		5830417C01Rik	desumoylating isopeptidase 2 (Desi2)	NM_024282	119637811
mmu-let-7i	1.1365	8.6276	6.38067	0.00117101	0.0162477	-0.871401	Dnajb12	DnaJ (Hsp40) homolog, subfamily B, member 12 (Dnajb12)	NM_019965	31982700	7	1436	GAGGUAG	1430	3UTR	0.0343	2		6030408C04Rik	G2/M-phase specific E3 ubiquitin ligase (G2e3)	NM_001015099	269784654
mmu-let-7i	1.1365	8.6276	6.38067	0.00117101	0.0162477	-0.871401	Mmp1b	matrix metallopeptidase 1b (interstitial collagenase) (Mmp1b)	NM_032007	115385969	7	1883	GAGGUAG	1877	3UTR	0.0343	2		6030443O07Rik	family with sequence similarity 178, member A (Fam178a)	NM_001081225	124487014
mmu-let-7i	1.1365	8.6276	6.38067	0.00117101	0.0162477	-0.871401	Pkp1	plakophilin 1 (Pkp1)	NM_019645	118130660	8	3579	UGAGGUAG	3572	3UTR	0.0343	1		6030498E09Rik	RIKEN cDNA 6030498E09 gene (6030498E09Rik)	NM_183126	124286798
mmu-let-7i	1.1365	8.6276	6.38067	0.00117101	0.0162477	-0.871401	Sh2b3	SH2B adaptor protein 3 (Sh2b3)	NM_008507	141802577	7	2414	UGAGGUA	2408	3UTR	0.0343	1		6330406I15Rik	mesenteric estrogen dependent adipogenesis (Medag)	NM_027519	146141109
mmu-let-7i	1.1365	8.6276	6.38067	0.00117101	0.0162477	-0.871401	Liph	lipase, member H (Liph)	NM_001083894	140970703	8	1942	GAGGUAGU	1935	3UTR	0.0342	2		6330416G13Rik	RIKEN cDNA 6330416G13 gene (6330416G13Rik)	NM_144905	260447098
mmu-let-7i	1.1365	8.6276	6.38067	0.00117101	0.0162477	-0.871401	Casp3	caspase 3 (Casp3)	NM_009810	549806823	7	1055	GAGGUAG	1049	3UTR	0.0341	2		6330439K17Rik	double zinc ribbon and ankyrin repeat domains 1 (Dzank1)	NM_172859	124378023
mmu-let-7i	1.1365	8.6276	6.38067	0.00117101	0.0162477	-0.871401	Golt1b	golgi transport 1 homolog B (S. cerevisiae) (Golt1b)	NM_025872	118130254	8	2041	UGAGGUAG	2034	3UTR	0.0341	1		6330500D04Rik	family with sequence similarity 65, member B (Fam65b)	NM_178658	554790343
mmu-let-7i	1.1365	8.6276	6.38067	0.00117101	0.0162477	-0.871401	Krt6a	keratin 6A (Krt6a)	NM_008476	54607170	7	1990	GAGGUAG	1984	3UTR	0.0341	2		6330512M04Rik	interferon induced transmembrane protein 10 (Ifitm10)	NM_177265	146198822
mmu-let-7i	1.1365	8.6276	6.38067	0.00117101	0.0162477	-0.871401	Smarcc1	SWI/SNF related, matrix associated, actin dependent regulator of chromatin, subfamily c, member 1 (Smarcc1)	NM_009211	112421096	8	4470	GAGGUAGU	4463	3UTR	0.0341	2		6330527O06Rik	lysosomal-associated membrane protein family, member 5 (Lamp5)	NM_029530	82546884
mmu-let-7i	1.1365	8.6276	6.38067	0.00117101	0.0162477	-0.871401	Vps25	vacuolar protein sorting 25 (yeast) (Vps25)	NM_026776	548923863	7	770	GAGGUAG	764	3UTR	0.0341	2		6330534C20Rik	coiled-coil domain containing 160 (Ccdc160)	NM_001034059	85702180
mmu-let-7i	1.1365	8.6276	6.38067	0.00117101	0.0162477	-0.871401	Fev	FEV (ETS oncogene family) (Fev)	NM_153111	237858809	7	1318	UGAGGUA	1312	3UTR	0.034	1		6330578E17Rik	cytochrome C oxidase assembly factor 5 (Coa5)	NM_198006	298358888
mmu-let-7i	1.1365	8.6276	6.38067	0.00117101	0.0162477	-0.871401	Sstr3	somatostatin receptor 3 (Sstr3)	NM_009218	133778972	8	3608	UGAGGUAG	3601	3UTR	0.0337	1		6430531B16Rik	RIKEN cDNA 6430531B16 gene (6430531B16Rik)	NM_001033465	142360518
mmu-let-7i	1.1365	8.6276	6.38067	0.00117101	0.0162477	-0.871401	Hdlbp	high density lipoprotein (HDL) binding protein (Hdlbp)	NM_133808	672424495	8	4911	UGAGGUAG	4904	3UTR	0.0335	1		6430548M08Rik	RIKEN cDNA 6430548M08 gene (6430548M08Rik)	NM_172286	255069799
mmu-let-7i	1.1365	8.6276	6.38067	0.00117101	0.0162477	-0.871401	Trim6	tripartite motif-containing 6 (Trim6)	NM_001013616	119637826	8	2335	UGAGGUAG	2328	3UTR	0.0333	1		6430550H21Rik	transmembrane protein 255A (Tmem255a)	NM_172930	576080532
mmu-let-7i	1.1365	8.6276	6.38067	0.00117101	0.0162477	-0.871401	Trim6	tripartite motif-containing 6 (Trim6)	NM_001013616	119637826	8	2290	UGAGGUAG	2283	3UTR	0.0333	1		6430598A04Rik	neuronal tyrosine-phosphorylated phosphoinositide 3-kinase adaptor 1 (Nyap1)	NM_175521	37537543
mmu-let-7i	1.1365	8.6276	6.38067	0.00117101	0.0162477	-0.871401	Trim6	tripartite motif-containing 6 (Trim6)	NM_001013616	119637826	8	2245	UGAGGUAG	2238	3UTR	0.0333	1		6720456B07Rik	BRICK1, SCAR/WAVE actin-nucleating complex subunit (Brk1)	NM_133937	19527153
mmu-let-7i	1.1365	8.6276	6.38067	0.00117101	0.0162477	-0.871401	Trim6	tripartite motif-containing 6 (Trim6)	NM_001013616	119637826	8	2200	UGAGGUAG	2193	3UTR	0.0333	1		6820408C15Rik	RIKEN cDNA 6820408C15 gene (6820408C15Rik)	NM_177656	576583480
mmu-let-7i	1.1365	8.6276	6.38067	0.00117101	0.0162477	-0.871401	Trim6	tripartite motif-containing 6 (Trim6)	NM_001013616	119637826	8	2155	UGAGGUAG	2148	3UTR	0.0333	1		9030418K01Rik	family with sequence similarity 217, member B (Fam217b)	NM_001081289	124486858
mmu-let-7i	1.1365	8.6276	6.38067	0.00117101	0.0162477	-0.871401	Trim6	tripartite motif-containing 6 (Trim6)	NM_001013616	119637826	8	2636	GAGGUAGU	2629	3UTR	0.0333	2		9130213B05Rik	prostate androgen-regulated mucin-like protein 1 (Parm1)	NM_145562	118130163
mmu-let-7i	1.1365	8.6276	6.38067	0.00117101	0.0162477	-0.871401	Ugt3a1	UDP glycosyltransferases 3 family, polypeptide A1 (Ugt3a1)	NM_207216	164450476	7	1834	UGAGGUA	1828	3UTR	0.0332	1		9230104L09Rik	RIKEN cDNA 9230104L09 gene (9230104L09Rik)	NM_029960	227496828
mmu-let-7i	1.1365	8.6276	6.38067	0.00117101	0.0162477	-0.871401	Zfp324	zinc finger protein 324 (Zfp324)	NM_178732	56118255	8	3911	UGAGGUAG	3904	3UTR	0.0332	1		9430020K01Rik	RIKEN cDNA 9430020K01 gene (9430020K01Rik)	NM_001081963	126506315
mmu-let-7i	1.1365	8.6276	6.38067	0.00117101	0.0162477	-0.871401	Fem1a	feminization 1 homolog a (C. elegans) (Fem1a)	NM_010192	226958668	8	3801	UGAGGUAG	3794	3UTR	0.0331	1		9430028L06Rik	piezo-type mechanosensitive ion channel component 2 (Piezo2)	NM_001039485	328887945
mmu-let-7i	1.1365	8.6276	6.38067	0.00117101	0.0162477	-0.871401	Rcl1	RNA terminal phosphate cyclase-like 1 (Rcl1)	NM_021525	31581584	7	1694	UGAGGUA	1688	3UTR	0.0331	1		9430069J07Rik	APC membrane recruitment 3 (Amer3)	NM_213727	237649071
mmu-let-7i	1.1365	8.6276	6.38067	0.00117101	0.0162477	-0.871401	Spint1	serine protease inhibitor, Kunitz type 1 (Spint1)	NM_016907	133778981	7	1814	GAGGUAG	1808	3UTR	0.0331	2		9430070O13Rik	RIKEN cDNA 9430070O13 gene	NM_001033180	142353474
mmu-let-7i	1.1365	8.6276	6.38067	0.00117101	0.0162477	-0.871401	Fbxw4	F-box and WD-40 domain protein 4 (Fbxw4)	NM_013907	118130948	7	1476	UGAGGUA	1470	3UTR	0.033	1		9430076C15Rik	cAMP responsive element binding protein 5 (Creb5)	NM_172728	141801838
mmu-let-7i	1.1365	8.6276	6.38067	0.00117101	0.0162477	-0.871401	Dkk3	dickkopf homolog 3 (Xenopus laevis) (Dkk3)	NM_015814	31560475	8	1642	UGAGGUAG	1635	3UTR	0.0329	1		9530008L14Rik	androgen dependent TFPI regulating protein (Adtrp)	NM_175417	146198697
mmu-let-7i	1.1365	8.6276	6.38067	0.00117101	0.0162477	-0.871401	F2rl3	coagulation factor II (thrombin) receptor-like 3 (F2rl3)	NM_007975	141803010	7	1725	GAGGUAG	1719	3UTR	0.0329	2		9530066K23Rik	NIPA-like domain containing 4 (Nipal4)	NM_172524	146149116
mmu-let-7i	1.1365	8.6276	6.38067	0.00117101	0.0162477	-0.871401	Atad3a	ATPase family, AAA domain containing 3A (Atad3a)	NM_179203	239985512	7	2091	UGAGGUA	2085	3UTR	0.0328	1		9630031F12Rik	family with sequence similarity 184, member B (Fam184b)	NM_021416	188219652
mmu-let-7i	1.1365	8.6276	6.38067	0.00117101	0.0162477	-0.871401	Ppargc1b	peroxisome proliferative activated receptor, gamma, coactivator 1 beta (Ppargc1b)	NM_133249	118131021	7	3147	UGAGGUA	3141	3UTR	0.0328	1		9630033F20Rik	RIKEN cDNA 9630033F20 gene (9630033F20Rik)	NM_177003	294489306
mmu-let-7i	1.1365	8.6276	6.38067	0.00117101	0.0162477	-0.871401	Ppargc1b	peroxisome proliferative activated receptor, gamma, coactivator 1 beta (Ppargc1b)	NM_133249	118131021	7	3139	UGAGGUA	3133	3UTR	0.0328	1		9630041N07Rik	zinc finger protein 879 (Zfp879)	NM_173387	595763338
mmu-let-7i	1.1365	8.6276	6.38067	0.00117101	0.0162477	-0.871401	2310014L17Rik	RIKEN cDNA 2310014L17 gene (2310014L17Rik)	NM_029809	270483767	8	2080	UGAGGUAG	2073	3UTR	0.0327	1		9830102E05Rik	solute carrier family 15, member 5 (Slc15a5)	NM_177787	282847429
mmu-let-7i	1.1365	8.6276	6.38067	0.00117101	0.0162477	-0.871401	Gsdmc3	gasdermin C3 (Gsdmc3)	NM_183194	226053536	7	1909	GAGGUAG	1903	3UTR	0.0327	2		9830134C10Rik	RAB44, member RAS oncogene family (Rab44)	NM_001002786	142381743
mmu-let-7i	1.1365	8.6276	6.38067	0.00117101	0.0162477	-0.871401	Ppargc1a	peroxisome proliferative activated receptor, gamma, coactivator 1 alpha (Ppargc1a)	NM_008904	238018130	7	2530	UGAGGUA	2524	3UTR	0.0327	1		9930012K11Rik	RIKEN cDNA 9930012K11 gene (9930012K11Rik)	NM_001004155	163838622
mmu-let-7i	1.1365	8.6276	6.38067	0.00117101	0.0162477	-0.871401	Wnt9a	wingless-type MMTV integration site family, member 9A (Wnt9a)	NM_139298	70778750	8	3193	UGAGGUAG	3186	3UTR	0.0327	1		A030004J04Rik	proline rich 9 (Prr9)	NM_175424	125991229
mmu-let-7i	1.1365	8.6276	6.38067	0.00117101	0.0162477	-0.871401	Adam8	a disintegrin and metallopeptidase domain 8 (Adam8)	NM_007403	118131182	7	2624	GAGGUAG	2618	3UTR	0.0322	2		A130010J15Rik	interferon regulatory factor 6 (Irf6)	NM_016851	114145466
mmu-let-7i	1.1365	8.6276	6.38067	0.00117101	0.0162477	-0.871401	Gipc1	GIPC PDZ domain containing family, member 1 (Gipc1)	NM_018771	24475640	7	1329	GAGGUAG	1323	3UTR	0.0322	2		A130022J15Rik	EGF domain-specific O-linked N-acetylglucosamine (GlcNAc) transferase (Eogt)	NM_175313	146198523
mmu-let-7i	1.1365	8.6276	6.38067	0.00117101	0.0162477	-0.871401	5730536A07Rik	family with sequence similarity 96, member A (Fam96a)	NM_026635	71773979	7	823	UGAGGUA	817	3UTR	0.0321	1		A130042E20Rik	ybeY metallopeptidase (Ybey)	NM_172550	113865957
mmu-let-7i	1.1365	8.6276	6.38067	0.00117101	0.0162477	-0.871401	Gpr45	G protein-coupled receptor 45 (Gpr45)	NM_053107	237757313	8	2706	UGAGGUAG	2699	3UTR	0.032	1		A230046K03Rik	RIKEN cDNA A230046K03 gene (A230046K03Rik)	NM_001033375	126090571
mmu-let-7i	1.1365	8.6276	6.38067	0.00117101	0.0162477	-0.871401	Esam	endothelial cell-specific adhesion molecule (Esam)	NM_027102	255982560	7	1427	GAGGUAG	1421	3UTR	0.0319	2		A230106M15Rik	family with sequence similarity 109, member A (Fam109a)	NM_175474	142385230
mmu-let-7i	1.1365	8.6276	6.38067	0.00117101	0.0162477	-0.871401	Gsdmc2	gasdermin C2 (Gsdmc2)	NM_177912	269954701	7	1836	GAGGUAG	1830	3UTR	0.0319	2		A230106N23Rik	family with sequence similarity 163, member A (Fam163a)	NM_177838	460838692
mmu-let-7i	1.1365	8.6276	6.38067	0.00117101	0.0162477	-0.871401	Lcorl	ligand dependent nuclear receptor corepressor-like (Lcorl)	NM_178142	357542567	8	1333	GAGGUAGU	1326	3UTR	0.0319	2		A2bp1	RNA binding protein, fox-1 homolog (C. elegans) 1 (Rbfox1)	NM_021477	225543390
mmu-let-7i	1.1365	8.6276	6.38067	0.00117101	0.0162477	-0.871401	Sit1	suppression inducing transmembrane adaptor 1 (Sit1)	NM_019436	227330567	7	999	UGAGGUA	993	3UTR	0.0319	1		a2ld1	gamma-glutamylamine cyclotransferase (Ggact)	NM_145466	274320054
mmu-let-7i	1.1365	8.6276	6.38067	0.00117101	0.0162477	-0.871401	Igf2bp3	insulin-like growth factor 2 mRNA binding protein 3 (Igf2bp3)	NM_023670	225543382	8	2777	GAGGUAGU	2770	3UTR	0.0318	2		A330049M08Rik	noncompact myelin associated protein (Ncmap)	NM_145555	283945581
mmu-let-7i	1.1365	8.6276	6.38067	0.00117101	0.0162477	-0.871401	Tmod2	tropomodulin 2 (Tmod2)	NM_001038710	84697030	9	7305	UGAGGUAGU	7297	3UTR	0.0318	1		A3galt2	alpha 1,3-galactosyltransferase 2 (isoglobotriaosylceramide synthase) (A3galt2)	NM_001009819	78486564
mmu-let-7i	1.1365	8.6276	6.38067	0.00117101	0.0162477	-0.871401	Cd300lb	CD300 antigen like family member B (Cd300lb)	NM_199221	80978940	8	1824	GAGGUAGU	1817	3UTR	0.0317	2		A430083B19Rik	sentan, cilia apical structure protein (Sntn)	NM_177624	142365087
mmu-let-7i	1.1365	8.6276	6.38067	0.00117101	0.0162477	-0.871401	Ddi2	DNA-damage inducible protein 2 (Ddi2)	NM_001017966	77404398	8	1496	UGAGGUAG	1489	3UTR	0.0317	1		A430084P05Rik	SLP adaptor and CSK interacting membrane protein (Scimp)	NM_001045526	142382084
mmu-let-7i	1.1365	8.6276	6.38067	0.00117101	0.0162477	-0.871401	Flad1	RFad1, flavin adenine dinucleotide synthetase, homolog (yeast) (Flad1)	NM_177041	89337261	7	1772	UGAGGUA	1766	3UTR	0.0317	1		A4galt	alpha 1,4-galactosyltransferase (A4galt)	NM_001004150	283483961
mmu-let-7i	1.1365	8.6276	6.38067	0.00117101	0.0162477	-0.871401	Kctd21	potassium channel tetramerisation domain containing 21 (Kctd21)	NM_001039039	148352322	8	2911	UGAGGUAG	2904	3UTR	0.0317	1		A730011L01Rik	endonuclease V (Endov)	NM_177394	257467542
mmu-let-7i	1.1365	8.6276	6.38067	0.00117101	0.0162477	-0.871401	Nup155	nucleoporin 155 (Nup155)	NM_133227	165932388	8	6285	GAGGUAGU	6278	3UTR	0.0317	2		A930041I02Rik	suppressor of cancer cell invasion (Scai)	NM_178778	86198338
mmu-let-7i	1.1365	8.6276	6.38067	0.00117101	0.0162477	-0.871401	Slc2a12	solute carrier family 2 (facilitated glucose transporter)	NM_178934	226437622	8	2854	UGAGGUAG	2847	3UTR	0.0317	1		AA408296	digestive organ expansion factor homolog (zebrafish) (Diexf)	NM_145415	56790941
mmu-let-7i	1.1365	8.6276	6.38067	0.00117101	0.0162477	-0.871401	Slc6a1	solute carrier family 6 (neurotransmitter transporter, GABA)	NM_178703	253735738	8	2136	UGAGGUAG	2129	3UTR	0.0317	1		AA409316	family with sequence similarity 83, member H (Fam83h)	NM_134087	269914117
mmu-let-7i	1.1365	8.6276	6.38067	0.00117101	0.0162477	-0.871401	Ugt3a2	UDP glycosyltransferases 3 family, polypeptide A2 (Ugt3a2)	NM_144845	142365155	7	1806	UGAGGUA	1800	3UTR	0.0317	1		Aadacl1	neutral cholesterol ester hydrolase 1 (Nceh1)	NM_178772	142363800
mmu-let-7i	1.1365	8.6276	6.38067	0.00117101	0.0162477	-0.871401	Crat	carnitine acetyltransferase (Crat)	NM_007760	86198337	8	3497	GAGGUAGU	3490	3UTR	0.0316	2		Aak1	AP2 associated kinase 1 (Aak1)	NM_001040106	145046263
mmu-let-7i	1.1365	8.6276	6.38067	0.00117101	0.0162477	-0.871401	Slc2a3	solute carrier family 2 (facilitated glucose transporter)	NM_011401	261862281	8	3167	UGAGGUAG	3160	3UTR	0.0316	1		Aars	alanyl-tRNA synthetase (Aars)	NM_146217	454531855
mmu-let-7i	1.1365	8.6276	6.38067	0.00117101	0.0162477	-0.871401	Tmem157	family with sequence similarity 174, member A (Fam174a)	NM_026321	162135955	8	1895	UGAGGUAG	1888	3UTR	0.0316	1		Aars2	alanyl-tRNA synthetase 2, mitochondrial (putative) (Aars2)	NM_198608	52630310
mmu-let-7i	1.1365	8.6276	6.38067	0.00117101	0.0162477	-0.871401	Bzw2	basic leucine zipper and W2 domains 2 (Bzw2)	NM_025840	255982503	7	1586	GAGGUAG	1580	3UTR	0.0315	2		Abca2	ATP-binding cassette, sub-family A (ABC1)	NM_007379	110225378
mmu-let-7i	1.1365	8.6276	6.38067	0.00117101	0.0162477	-0.871401	Crtac1	cartilage acidic protein 1 (Crtac1)	NM_145123	142350981	7	2162	GAGGUAG	2156	3UTR	0.0315	2		Abcb11	ATP-binding cassette, sub-family B (MDR/TAP)	NM_021022	120432046
mmu-let-7i	1.1365	8.6276	6.38067	0.00117101	0.0162477	-0.871401	Dhx8	DEAH (Asp-Glu-Ala-His) box polypeptide 8 (Dhx8)	NM_144831	56699439	7	4292	GAGGUAG	4286	3UTR	0.0315	2		Abcb9	ATP-binding cassette, sub-family B (MDR/TAP)	NM_019875	66932951
mmu-let-7i	1.1365	8.6276	6.38067	0.00117101	0.0162477	-0.871401	Yeats4	YEATS domain containing 4 (Yeats4)	NM_026570	226493123	7	1278	GAGGUAG	1272	3UTR	0.0315	2		Abcc1	ATP-binding cassette, sub-family C (CFTR/MRP)	NM_008576	357430786
mmu-let-7i	1.1365	8.6276	6.38067	0.00117101	0.0162477	-0.871401	Psg17	pregnancy specific glycoprotein 17 (Psg17)	NM_007677	114796627	7	1978	UGAGGUA	1972	3UTR	0.0314	1		Abcc10	ATP-binding cassette, sub-family C (CFTR/MRP)	NM_145140	102467835
mmu-let-7i	1.1365	8.6276	6.38067	0.00117101	0.0162477	-0.871401	March9	membrane-associated ring finger (C3HC4) 9 (March9)	NM_001033262	141802613	7	1769	UGAGGUA	1763	3UTR	0.0313	1		Abcc5	ATP-binding cassette, sub-family C (CFTR/MRP)	NM_013790	66932953
mmu-let-7i	1.1365	8.6276	6.38067	0.00117101	0.0162477	-0.871401	Slc37a4	solute carrier family 37 (glucose-6-phosphate transporter)	NM_008063	51592075	7	1972	UGAGGUA	1966	3UTR	0.0313	1		Abcd1	ATP-binding cassette, sub-family D (ALD)	NM_007435	6671496
mmu-let-7i	1.1365	8.6276	6.38067	0.00117101	0.0162477	-0.871401	Krt6b	keratin 6B (Krt6b)	NM_010669	113195683	7	1989	GAGGUAG	1983	3UTR	0.0312	2		Abce1	ATP-binding cassette, sub-family E (OABP)	NM_015751	114205430
mmu-let-7i	1.1365	8.6276	6.38067	0.00117101	0.0162477	-0.871401	Ms4a13	membrane-spanning 4-domains, subfamily A, member 13 (Ms4a13)	NM_198224	118130838	7	1285	GAGGUAG	1279	3UTR	0.0312	2		Abcf1	ATP-binding cassette, sub-family F (GCN20)	NM_013854	39930334
mmu-let-7i	1.1365	8.6276	6.38067	0.00117101	0.0162477	-0.871401	Gdf6	growth differentiation factor 6 (Gdf6)	NM_013526	41529817	8	3412	UGAGGUAG	3405	3UTR	0.031	1		Abcf2	ATP-binding cassette, sub-family F (GCN20)	NM_013853	299473732
mmu-let-7i	1.1365	8.6276	6.38067	0.00117101	0.0162477	-0.871401	9430069J07Rik	APC membrane recruitment 3 (Amer3)	NM_213727	237649071	8	3539	UGAGGUAG	3532	3UTR	0.0309	1		Abcg8	ATP-binding cassette, sub-family G (WHITE)	NM_026180	553727216
mmu-let-7i	1.1365	8.6276	6.38067	0.00117101	0.0162477	-0.871401	Ly6g6c	lymphocyte antigen 6 complex, locus G6C (Ly6g6c)	NM_023463	50845397	7	769	GAGGUAG	763	3UTR	0.0309	2		Abhd13	abhydrolase domain containing 13 (Abhd13)	NM_001081119	124487440
mmu-let-7i	1.1365	8.6276	6.38067	0.00117101	0.0162477	-0.871401	Chd4	chromodomain helicase DNA binding protein 4 (Chd4)	NM_145979	118130239	7	6358	GAGGUAG	6352	3UTR	0.0308	2		Abhd14b	abhydrolase domain containing 14b (Abhd14b)	NM_029631	171460959
mmu-let-7i	1.1365	8.6276	6.38067	0.00117101	0.0162477	-0.871401	Cdcp2	CUB domain containing protein 2 (Cdcp2)	NM_172873	141802087	7	2136	GAGGUAG	2130	3UTR	0.0306	2		Abhd9	epoxide hydrolase 3 (Ephx3)	NM_001033163	146198647
mmu-let-7i	1.1365	8.6276	6.38067	0.00117101	0.0162477	-0.871401	D330012F22Rik	GDP-D-glucose phosphorylase 1 (Gdpgp1)	NM_178752	123702128	8	3208	GAGGUAGU	3201	3UTR	0.0306	2		Abi3	ABI gene family, member 3 (Abi3)	NM_025659	254750622
mmu-let-7i	1.1365	8.6276	6.38067	0.00117101	0.0162477	-0.871401	Dkk4	dickkopf homolog 4 (Xenopus laevis) (Dkk4)	NM_145592	128485763	7	959	GAGGUAG	953	3UTR	0.0306	2		Abl1	c-abl oncogene 1, non-receptor tyrosine kinase (Abl1)	NM_009594	545688120
mmu-let-7i	1.1365	8.6276	6.38067	0.00117101	0.0162477	-0.871401	Riok3	RIO kinase 3 (Riok3)	NM_024182	142388970	8	1785	GAGGUAGU	1778	3UTR	0.0306	2		Ablim2	actin-binding LIM protein 2 (Ablim2)	NM_177678	295148096
mmu-let-7i	1.1365	8.6276	6.38067	0.00117101	0.0162477	-0.871401	Taf7	TAF7 RNA polymerase II, TATA box binding protein (TBP)-associated factor	NM_011901	6755711	7	1636	UGAGGUA	1630	3UTR	0.0306	1		Abo	ABO blood group (transferase A, alpha 1-3-N-acetylgalactosaminyltransferase, transferase B, alpha 1-3-galactosyltransferase) (Abo)	NM_030718	594190844
mmu-let-7i	1.1365	8.6276	6.38067	0.00117101	0.0162477	-0.871401	Acat1	acetyl-Coenzyme A acetyltransferase 1 (Acat1)	NM_144784	118130035	8	1909	UGAGGUAG	1902	3UTR	0.0304	1		Abr	active BCR-related gene (Abr)	NM_198895	600971678
mmu-let-7i	1.1365	8.6276	6.38067	0.00117101	0.0162477	-0.871401	Acat1	acetyl-Coenzyme A acetyltransferase 1 (Acat1)	NM_144784	118130035	8	3309	GAGGUAGU	3302	3UTR	0.0304	2		AC102176.8-201	NHP2 non-histone chromosome protein 2-like 1 (S. cerevisiae) (Nhp2l1)	NM_011482	144922681
mmu-let-7i	1.1365	8.6276	6.38067	0.00117101	0.0162477	-0.871401	Ndst2	N-deacetylase/N-sulfotransferase (heparan glucosaminyl) 2 (Ndst2)	NM_010811	113195687	7	3509	GAGGUAG	3503	3UTR	0.0304	2		AC109199.10	ankyrin repeat and SOCS box-containing 1 (Asb1)	NM_001039126	103472023
mmu-let-7i	1.1365	8.6276	6.38067	0.00117101	0.0162477	-0.871401	Nefm	neurofilament, medium polypeptide (Nefm)	NM_008691	112363106	7	3101	UGAGGUA	3095	3UTR	0.0304	1		AC115045.13	transmembrane protein 176A (Tmem176a)	NM_025326	148298741
mmu-let-7i	1.1365	8.6276	6.38067	0.00117101	0.0162477	-0.871401	Upk1a	uroplakin 1A (Upk1a)	NM_026815	142373524	7	909	UGAGGUA	903	3UTR	0.0304	1		AC119914.10	solute carrier family 45, member 4 (Slc45a4)	NM_001033219	269914131
mmu-let-7i	1.1365	8.6276	6.38067	0.00117101	0.0162477	-0.871401	AC156952.22	utrophin (Utrn)	NM_011682	110431377	8	11952	UGAGGUAG	11945	3UTR	0.0301	1		AC121108.12	transducin (beta)-like 1X-linked receptor 1 (Tbl1xr1)	NM_030732	130978338
mmu-let-7i	1.1365	8.6276	6.38067	0.00117101	0.0162477	-0.871401	Lcor	ligand dependent nuclear receptor corepressor (Lcor)	NM_172154	146149308	7	4404	UGAGGUA	4398	3UTR	0.0301	1		AC122398.2	suppressor of cytokine signaling 6 (Socs6)	NM_018821	260436972
mmu-let-7i	1.1365	8.6276	6.38067	0.00117101	0.0162477	-0.871401	Fuk	fucokinase (Fuk)	NM_172283	391324722	7	3390	GAGGUAG	3384	3UTR	0.03	2		AC123606.11	solute carrier family 38, member 1 (Slc38a1)	NM_134086	262050559
mmu-let-7i	1.1365	8.6276	6.38067	0.00117101	0.0162477	-0.871401	Ubxd3	UBX domain protein 10 (Ubxn10)	NM_178671	552953723	8	2617	GAGGUAGU	2610	3UTR	0.03	2		AC123697.19	guanylate binding protein 6 (Gbp6)	NM_194336	170650636
mmu-let-7i	1.1365	8.6276	6.38067	0.00117101	0.0162477	-0.871401	Ammecr1l	AMME chromosomal region gene 1-like (Ammecr1l)	NM_153515	334848169	8	2224	UGAGGUAG	2217	3UTR	0.0299	1		AC125212.3-202	sperm motility kinase 3B (Smok3b)	NM_001039889	532524930
mmu-let-7i	1.1365	8.6276	6.38067	0.00117101	0.0162477	-0.871401	Egln2	egl-9 family hypoxia-inducible factor 2 (Egln2)	NM_053208	293651563	7	2021	UGAGGUA	2015	3UTR	0.0299	1		AC127284.5	ankyrin repeat domain 50	NM_001033198	142374817
mmu-let-7i	1.1365	8.6276	6.38067	0.00117101	0.0162477	-0.871401	Gata1	GATA binding protein 1 (Gata1)	NM_008089	449310785	7	1447	GAGGUAG	1441	3UTR	0.0299	2		AC127336.4-202	vomeronasal 1 receptor 148 (Vmn1r148)	NM_030736	270341332
mmu-let-7i	1.1365	8.6276	6.38067	0.00117101	0.0162477	-0.871401	Tmem41a	transmembrane protein 41a (Tmem41a)	NM_025693	321267576	7	1177	GAGGUAG	1171	3UTR	0.0299	2		AC135108.3	pleckstrin homology domain containing, family O member 2 (Plekho2)	NM_153119	460417278
mmu-let-7i	1.1365	8.6276	6.38067	0.00117101	0.0162477	-0.871401	Bxdc1	ribosome production factor 2 homolog (S. cerevisiae) (Rpf2)	NM_001042556	110347520	7	1728	UGAGGUA	1722	3UTR	0.0298	1		AC140392.3	mortality factor 4 like 1 (Morf4l1)	NM_001039147	258645106
mmu-let-7i	1.1365	8.6276	6.38067	0.00117101	0.0162477	-0.871401	Ccdc60	coiled-coil domain containing 60 (Ccdc60)	NM_177759	141802445	7	2283	GAGGUAG	2277	3UTR	0.0298	2		AC148095.6	small proline-rich protein 2A1 (Sprr2a1)	NM_011468	85785857
mmu-let-7i	1.1365	8.6276	6.38067	0.00117101	0.0162477	-0.871401	0610007P08Rik	excision repair cross-complementing rodent repair deficiency, complementation group 6 like 2 (Ercc6l2)	NM_023507	91807127	7	2412	UGAGGUA	2406	3UTR	0.0297	1		AC156028.2-203	sterile alpha motif domain containing 1 (Samd1)	NM_001081415	124487220
mmu-let-7i	1.1365	8.6276	6.38067	0.00117101	0.0162477	-0.871401	Tmem2	transmembrane protein 2 (Tmem2)	NM_001033759	557357661	8	6175	UGAGGUAG	6168	3UTR	0.0297	1		AC156952.22	utrophin (Utrn)	NM_011682	110431377
mmu-let-7i	1.1365	8.6276	6.38067	0.00117101	0.0162477	-0.871401	Dpagt1	dolichyl-phosphate (UDP-N-acetylglucosamine) acetylglucosaminephosphotransferase 1 (GlcNAc-1-P transferase) (Dpagt1)	NM_007875	31982408	7	1454	UGAGGUA	1448	3UTR	0.0296	1		AC158564.7	cartilage intermediate layer protein 2 (Cilp2)	NM_026818	168480099
mmu-let-7i	1.1365	8.6276	6.38067	0.00117101	0.0162477	-0.871401	Ikbkap	inhibitor of kappa light polypeptide enhancer in B cells, kinase complex-associated protein (Ikbkap)	NM_026079	158937297	8	4662	UGAGGUAG	4655	3UTR	0.0296	1		AC158970.3	transducer of ERBB2, 2 (Tob2)	NM_020507	108796647
mmu-let-7i	1.1365	8.6276	6.38067	0.00117101	0.0162477	-0.871401	Ikbkap	inhibitor of kappa light polypeptide enhancer in B cells, kinase complex-associated protein (Ikbkap)	NM_026079	158937297	8	5254	GAGGUAGU	5247	3UTR	0.0296	2		AC158997.2	phosphatidylinositol glycan anchor biosynthesis, class B (Pigb)	NM_018889	167900467
mmu-let-7i	1.1365	8.6276	6.38067	0.00117101	0.0162477	-0.871401	Slco2a1	solute carrier organic anion transporter family, member 2a1 (Slco2a1)	NM_033314	141802538	8	3221	GAGGUAGU	3214	3UTR	0.0296	2		AC161876.3	major facilitator superfamily domain containing 6 (Mfsd6)	NM_133829	160707918
mmu-let-7i	1.1365	8.6276	6.38067	0.00117101	0.0162477	-0.871401	Dcun1d2	DCN1, defective in cullin neddylation 1, domain containing 2 (S. cerevisiae) (Dcun1d2)	NM_001042650	111162656	8	1967	UGAGGUAG	1960	3UTR	0.0294	1		AC165285.2	transmembrane protein 254a (Tmem254a)	NM_025311	298566316
mmu-let-7i	1.1365	8.6276	6.38067	0.00117101	0.0162477	-0.871401	Hook1	hook homolog 1 (Drosophila) (Hook1)	NM_030014	40254145	8	4104	GAGGUAGU	4097	3UTR	0.0293	2		AC166360.4-201	unc-93 homolog A (C. elegans) (Unc93a)	NM_199252	294489303
mmu-let-7i	1.1365	8.6276	6.38067	0.00117101	0.0162477	-0.871401	Ints2	integrator complex subunit 2 (Ints2)	NM_027421	86476083	8	5344	UGAGGUAG	5337	3UTR	0.0293	1		AC166365.4	retinol dehydrogenase 8 (Rdh8)	NM_001030290	71892411
mmu-let-7i	1.1365	8.6276	6.38067	0.00117101	0.0162477	-0.871401	Myom1	myomesin 1 (Myom1)	NM_010867	145279174	7	5476	UGAGGUA	5470	3UTR	0.0293	1		Acaa1a	acetyl-Coenzyme A acyltransferase 1A (Acaa1a)	NM_130864	118131053
mmu-let-7i	1.1365	8.6276	6.38067	0.00117101	0.0162477	-0.871401	Stard3nl	STARD3 N-terminal like (Stard3nl)	NM_024270	70794798	7	936	UGAGGUA	930	3UTR	0.0292	1		Acaa2	acetyl-Coenzyme A acyltransferase 2 (mitochondrial 3-oxoacyl-Coenzyme A thiolase) (Acaa2)	NM_177470	142366266
mmu-let-7i	1.1365	8.6276	6.38067	0.00117101	0.0162477	-0.871401	Col9a1	collagen, type IX, alpha 1 (Col9a1)	NM_007740	226693379	7	3368	UGAGGUA	3362	3UTR	0.0291	1		Acacb	acetyl-Coenzyme A carboxylase beta (Acacb)	NM_133904	157042797
mmu-let-7i	1.1365	8.6276	6.38067	0.00117101	0.0162477	-0.871401	Zfp146	zinc finger protein 146 (Zfp146)	NM_011980	116642879	7	1614	UGAGGUA	1608	3UTR	0.0291	1		Acad11	nephronophthisis 3 (adolescent) (Nphp3)	NM_028721	159131888
mmu-let-7i	1.1365	8.6276	6.38067	0.00117101	0.0162477	-0.871401	Ppapdc2	phosphatidic acid phosphatase type 2 domain containing 2 (Ppapdc2)	NM_028922	261862288	8	2515	GAGGUAGU	2508	3UTR	0.0289	2		Acad8	acyl-Coenzyme A dehydrogenase family, member 8 (Acad8)	NM_025862	118403321
mmu-let-7i	1.1365	8.6276	6.38067	0.00117101	0.0162477	-0.871401	Pogz	pogo transposable element with ZNF domain (Pogz)	NM_172683	260099683	7	4602	UGAGGUA	4596	3UTR	0.0287	1		Acat1	acetyl-Coenzyme A acetyltransferase 1 (Acat1)	NM_144784	118130035
mmu-let-7i	1.1365	8.6276	6.38067	0.00117101	0.0162477	-0.871401	Raver2	ribonucleoprotein, PTB-binding 2 (Raver2)	NM_183024	33942105	8	3195	UGAGGUAG	3188	3UTR	0.0287	1		Acat2	acetyl-Coenzyme A acetyltransferase 2 (Acat2)	NM_009338	148747460
mmu-let-7i	1.1365	8.6276	6.38067	0.00117101	0.0162477	-0.871401	Il12a	interleukin 12a (Il12a)	NM_008351	226874943	7	934	GAGGUAG	928	3UTR	0.0286	2		Acat3	acetyl-Coenzyme A acetyltransferase 3 (Acat3)	NM_153151	112181180
mmu-let-7i	1.1365	8.6276	6.38067	0.00117101	0.0162477	-0.871401	4933417O08Rik	golgi autoantigen, golgin subfamily a, 7B (Golga7b)	NM_027694	213972647	8	2465	UGAGGUAG	2458	3UTR	0.0285	1		Accn1	acid-sensing (proton-gated) ion channel 2 (Asic2)	NM_001034013	111074519
mmu-let-7i	1.1365	8.6276	6.38067	0.00117101	0.0162477	-0.871401	Nrarp	Notch-regulated ankyrin repeat protein (Nrarp)	NM_025980	110815819	8	768	GAGGUAGU	761	3UTR	0.0285	2		Ace2	angiotensin I converting enzyme (peptidyl-dipeptidase A) 2 (Ace2)	NM_027286	194473665
mmu-let-7i	1.1365	8.6276	6.38067	0.00117101	0.0162477	-0.871401	Zc3h3	zinc finger CCCH type containing 3 (Zc3h3)	NM_172121	26006470	7	2897	GAGGUAG	2891	3UTR	0.0284	2		Acin1	apoptotic chromatin condensation inducer 1 (Acin1)	NM_023190	194394193
mmu-let-7i	1.1365	8.6276	6.38067	0.00117101	0.0162477	-0.871401	Meis3	Meis homeobox 3 (Meis3)	NM_008627	699045656	7	1446	GAGGUAG	1440	3UTR	0.0282	2		Acly	ATP citrate lyase (Acly)	NM_134037	313151220
mmu-let-7i	1.1365	8.6276	6.38067	0.00117101	0.0162477	-0.871401	Chchd8	cytochrome c oxidase assembly factor 4 (Coa4)	NM_183270	109948296	7	617	GAGGUAG	611	3UTR	0.0281	2		Acn9	ACN9 homolog (S. cerevisiae) (Acn9)	NM_001077713	124248480
mmu-let-7i	1.1365	8.6276	6.38067	0.00117101	0.0162477	-0.871401	Thoc1	THO complex 1 (Thoc1)	NM_153552	142374372	8	3062	UGAGGUAG	3055	3UTR	0.0281	1		Aco1	aconitase 1 (Aco1)	NM_007386	110347486
mmu-let-7i	1.1365	8.6276	6.38067	0.00117101	0.0162477	-0.871401	Galnt12	UDP-N-acetyl-alpha-D-galactosamine:polypeptide N-acetylgalactosaminyltransferase 12 (Galnt12)	NM_172693	141802625	7	2098	UGAGGUA	2092	3UTR	0.028	1		Acot11	acyl-CoA thioesterase 11 (Acot11)	NM_025590	254911012
mmu-let-7i	1.1365	8.6276	6.38067	0.00117101	0.0162477	-0.871401	Npepl1	aminopeptidase-like 1 (Npepl1)	NM_213733	227908841	7	1687	UGAGGUA	1681	3UTR	0.0279	1		Acot3	acyl-CoA thioesterase 3 (Acot3)	NM_134246	118129952
mmu-let-7i	1.1365	8.6276	6.38067	0.00117101	0.0162477	-0.871401	Lrrc58	leucine rich repeat containing 58 (Lrrc58)	NM_177093	110347494	9	2815	UGAGGUAGU	2807	3UTR	0.0278	1		Acot8	acyl-CoA thioesterase 8 (Acot8)	NM_133240	254587963
mmu-let-7i	1.1365	8.6276	6.38067	0.00117101	0.0162477	-0.871401	Slc7a11	solute carrier family 7 (cationic amino acid transporter, y+ system)	NM_011990	80861466	9	6996	GAGGUAGUA	6988	3UTR	0.0277	2		Acoxl	acyl-Coenzyme A oxidase-like (Acoxl)	NM_028765	227452354
mmu-let-7i	1.1365	8.6276	6.38067	0.00117101	0.0162477	-0.871401	Zfp689	zinc finger protein 689 (Zfp689)	NM_175163	169808404	8	2233	UGAGGUAG	2226	3UTR	0.0276	1		Acp5	acid phosphatase 5, tartrate resistant (Acp5)	NM_007388	156151431
mmu-let-7i	1.1365	8.6276	6.38067	0.00117101	0.0162477	-0.871401	Urm1	ubiquitin related modifier 1 homolog (S. cerevisiae) (Urm1)	NM_026615	146141213	8	2142	GAGGUAGU	2135	3UTR	0.0275	2		Acpp	acid phosphatase, prostate (Acpp)	NM_207668	92373432
mmu-let-7i	1.1365	8.6276	6.38067	0.00117101	0.0162477	-0.871401	2410042D21Rik	katanin p80 subunit B like 1 (Katnbl1)	NM_024254	133893139	8	2132	GAGGUAGU	2125	3UTR	0.0274	2		Acsbg1	acyl-CoA synthetase bubblegum family member 1 (Acsbg1)	NM_053178	133891660
mmu-let-7i	1.1365	8.6276	6.38067	0.00117101	0.0162477	-0.871401	Cd5	CD5 antigen (Cd5)	NM_007650	126517488	7	1656	UGAGGUA	1650	3UTR	0.0274	1		Acsl1	acyl-CoA synthetase long-chain family member 1 (Acsl1)	NM_007981	694879457
mmu-let-7i	1.1365	8.6276	6.38067	0.00117101	0.0162477	-0.871401	6330406I15Rik	mesenteric estrogen dependent adipogenesis (Medag)	NM_027519	146141109	8	2365	UGAGGUAG	2358	3UTR	0.027	1		Acsl4	acyl-CoA synthetase long-chain family member 4 (Acsl4)	NM_207625	75992923
mmu-let-7i	1.1365	8.6276	6.38067	0.00117101	0.0162477	-0.871401	Osmr	oncostatin M receptor (Osmr)	NM_011019	162287201	8	3787	GAGGUAGU	3780	3UTR	0.027	2		Acsl5	acyl-CoA synthetase long-chain family member 5 (Acsl5)	NM_027976	75992928
mmu-let-7i	1.1365	8.6276	6.38067	0.00117101	0.0162477	-0.871401	Tln1	talin 1 (Tln1)	NM_011602	227116326	7	8380	UGAGGUA	8374	3UTR	0.027	1		Acsm5	acyl-CoA synthetase medium-chain family member 5 (Acsm5)	NM_178758	124249087
mmu-let-7i	1.1365	8.6276	6.38067	0.00117101	0.0162477	-0.871401	Jmjd2d	lysine (K)-specific demethylase 4D (Kdm4d)	NM_173433	116174755	7	2261	UGAGGUA	2255	3UTR	0.0269	1		Acta1	actin, alpha 1, skeletal muscle (Acta1)	NM_009606	439253889
mmu-let-7i	1.1365	8.6276	6.38067	0.00117101	0.0162477	-0.871401	Zswim5	zinc finger SWIM-type containing 5 (Zswim5)	NM_001029912	118131187	8	4958	UGAGGUAG	4951	3UTR	0.0267	1		Actl7a	actin-like 7a (Actl7a)	NM_009611	158937265
mmu-let-7i	1.1365	8.6276	6.38067	0.00117101	0.0162477	-0.871401	Atg4b	autophagy related 4B, cysteine peptidase (Atg4b)	NM_174874	146198771	8	1771	UGAGGUAG	1764	3UTR	0.0266	1		Actn4	actinin alpha 4 (Actn4)	NM_021895	18702319
mmu-let-7i	1.1365	8.6276	6.38067	0.00117101	0.0162477	-0.871401	Rnf8	ring finger protein 8 (Rnf8)	NM_021419	23956111	7	1882	UGAGGUA	1876	3UTR	0.0266	1		Actr10	ARP10 actin-related protein 10 (Actr10)	NM_019785	226246592
mmu-let-7i	1.1365	8.6276	6.38067	0.00117101	0.0162477	-0.871401	Sh3bgr	SH3-binding domain glutamic acid-rich protein (Sh3bgr)	NM_015825	125490366	7	1064	GAGGUAG	1058	3UTR	0.0266	2		Actr3b	ARP3 actin-related protein 3B (Actr3b)	NM_001004365	52345393
mmu-let-7i	1.1365	8.6276	6.38067	0.00117101	0.0162477	-0.871401	Birc5	baculoviral IAP repeat-containing 5 (Birc5)	NM_009689	59859886	7	705	GAGGUAG	699	3UTR	0.0265	2		Actr5	ARP5 actin-related protein 5 (Actr5)	NM_175419	91176334
mmu-let-7i	1.1365	8.6276	6.38067	0.00117101	0.0162477	-0.871401	Dcun1d3	DCN1, defective in cullin neddylation 1, domain containing 3 (S. cerevisiae) (Dcun1d3)	NM_173408	254911086	8	2005	UGAGGUAG	1998	3UTR	0.0265	1		Acvr1b	activin A receptor, type 1B (Acvr1b)	NM_007395	142366071
mmu-let-7i	1.1365	8.6276	6.38067	0.00117101	0.0162477	-0.871401	Kcnk18	potassium channel, subfamily K, member 18 (Kcnk18)	NM_207261	118131054	8	2718	UGAGGUAG	2711	3UTR	0.0265	1		Acvrl1	activin A receptor, type II-like 1 (Acvrl1)	NM_009612	471015138
mmu-let-7i	1.1365	8.6276	6.38067	0.00117101	0.0162477	-0.871401	Col5a2	collagen, type V, alpha 2 (Col5a2)	NM_007737	86613789	8	5845	UGAGGUAG	5838	3UTR	0.0264	1		Acy1	aminoacylase 1 (Acy1)	NM_025371	449784890
mmu-let-7i	1.1365	8.6276	6.38067	0.00117101	0.0162477	-0.871401	Gabrd	gamma-aminobutyric acid (GABA) A receptor, subunit delta (Gabrd)	NM_008072	160707922	7	1587	UGAGGUA	1581	3UTR	0.0264	1		Adam12	a disintegrin and metallopeptidase domain 12 (meltrin alpha) (Adam12)	NM_007400	117606340
mmu-let-7i	1.1365	8.6276	6.38067	0.00117101	0.0162477	-0.871401	D630039A03Rik	RIKEN cDNA D630039A03 gene (D630039A03Rik)	NM_178727	65301479	8	2147	GAGGUAGU	2140	3UTR	0.0263	2		Adam15	a disintegrin and metallopeptidase domain 15 (metargidin) (Adam15)	NM_001037722	109148516
mmu-let-7i	1.1365	8.6276	6.38067	0.00117101	0.0162477	-0.871401	Zfp142	zinc finger protein 142 (Zfp142)	NM_029888	141801887	8	6251	UGAGGUAG	6244	3UTR	0.0263	1		Adam17	a disintegrin and metallopeptidase domain 17 (Adam17)	NM_009615	471270255
mmu-let-7i	1.1365	8.6276	6.38067	0.00117101	0.0162477	-0.871401	Sepn1	selenoprotein N, 1 (Sepn1)	NM_029100	111118963	8	1825	UGAGGUAG	1818	3UTR	0.0262	1		Adam1a	a disintegrin and metallopeptidase domain 1a (Adam1a)	NM_172126	31559888
mmu-let-7i	1.1365	8.6276	6.38067	0.00117101	0.0162477	-0.871401	Il23r	interleukin 23 receptor (Il23r)	NM_144548	21362352	7	2164	UGAGGUA	2158	3UTR	0.0261	1		Adam24	a disintegrin and metallopeptidase domain 24 (testase 1) (Adam24)	NM_010086	157012012
mmu-let-7i	1.1365	8.6276	6.38067	0.00117101	0.0162477	-0.871401	Rspo2	R-spondin 2 homolog (Xenopus laevis) (Rspo2)	NM_172815	146198730	8	3057	GAGGUAGU	3050	3UTR	0.0261	2		Adam25	a disintegrin and metallopeptidase domain 25 (testase 2) (Adam25)	NM_011781	157041234
mmu-let-7i	1.1365	8.6276	6.38067	0.00117101	0.0162477	-0.871401	Pcx	pyruvate carboxylase (Pcx)	NM_008797	251823977	7	3948	GAGGUAG	3942	3UTR	0.0259	2		Adam33	a disintegrin and metallopeptidase domain 33 (Adam33)	NM_033615	254587923
mmu-let-7i	1.1365	8.6276	6.38067	0.00117101	0.0162477	-0.871401	1810008A18Rik	family with sequence similarity 207, member A (Fam207a)	NM_133998	227430354	8	2166	GAGGUAGU	2159	3UTR	0.0258	2		Adam8	a disintegrin and metallopeptidase domain 8 (Adam8)	NM_007403	118131182
mmu-let-7i	1.1365	8.6276	6.38067	0.00117101	0.0162477	-0.871401	Indol1	indoleamine 2,3-dioxygenase 2 (Ido2)	NM_145949	170763487	8	2551	GAGGUAGU	2544	3UTR	0.0258	2		Adamts15	a disintegrin-like and metallopeptidase (reprolysin type) with thrombospondin type 1 motif, 15 (Adamts15)	NM_001024139	71725382
mmu-let-7i	1.1365	8.6276	6.38067	0.00117101	0.0162477	-0.871401	Wbscr22	Williams Beuren syndrome chromosome region 22 (Wbscr22)	NM_025375	363543361	7	1051	UGAGGUA	1045	3UTR	0.0258	1		Adamts17	a disintegrin-like and metallopeptidase (reprolysin type) with thrombospondin type 1 motif, 17 (Adamts17)	NM_001033877	148529019
mmu-let-7i	1.1365	8.6276	6.38067	0.00117101	0.0162477	-0.871401	Eme1	essential meiotic endonuclease 1 homolog 1 (S. pombe) (Eme1)	NM_177752	146198573	7	1915	GAGGUAG	1909	3UTR	0.0257	2		Adamts18	a disintegrin-like and metallopeptidase (reprolysin type) with thrombospondin type 1 motif, 18 (Adamts18)	NM_172466	121583652
mmu-let-7i	1.1365	8.6276	6.38067	0.00117101	0.0162477	-0.871401	Gpr137b	G protein-coupled receptor 137B (Gpr137b)	NM_031999	148612871	8	2038	GAGGUAGU	2031	3UTR	0.0257	2		Adamts4	NME/NM23 family member 8 (Nme8)	NM_181591	167000068
mmu-let-7i	1.1365	8.6276	6.38067	0.00117101	0.0162477	-0.871401	Gla	galactosidase, alpha (Gla)	NM_013463	133778923	8	2929	UGAGGUAG	2922	3UTR	0.0256	1		Adamts8	a disintegrin-like and metallopeptidase (reprolysin type) with thrombospondin type 1 motif, 8 (Adamts8)	NM_013906	117647242
mmu-let-7i	1.1365	8.6276	6.38067	0.00117101	0.0162477	-0.871401	Sall4	sal-like 4 (Drosophila) (Sall4)	NM_201396	117553632	8	2098	UGAGGUAG	2091	3UTR	0.0256	1		Adamtsl4	ADAMTS-like 4 (Adamtsl4)	NM_144899	678246466
mmu-let-7i	1.1365	8.6276	6.38067	0.00117101	0.0162477	-0.871401	Socs1	suppressor of cytokine signaling 1 (Socs1)	NM_009896	87044896	7	1063	GAGGUAG	1057	3UTR	0.0256	2		Adar	adenosine deaminase, RNA-specific (Adar)	NM_019655	226371678
mmu-let-7i	1.1365	8.6276	6.38067	0.00117101	0.0162477	-0.871401	Clp1	CLP1, cleavage and polyadenylation factor I subunit (Clp1)	NM_133840	118130843	7	1536	GAGGUAG	1530	3UTR	0.0255	2		Adarb1	adenosine deaminase, RNA-specific, B1 (Adarb1)	NM_130895	161377448
mmu-let-7i	1.1365	8.6276	6.38067	0.00117101	0.0162477	-0.871401	Bsg	basigin (Bsg)	NM_009768	116014344	7	1394	GAGGUAG	1388	3UTR	0.0254	2		Adck1	aarF domain containing kinase 1 (Adck1)	NM_028105	471434860
mmu-let-7i	1.1365	8.6276	6.38067	0.00117101	0.0162477	-0.871401	Dpp3	dipeptidylpeptidase 3 (Dpp3)	NM_133803	244791123	7	2349	GAGGUAG	2343	3UTR	0.0254	2		Adcy1	adenylate cyclase 1 (Adcy1)	NM_009622	61888831
mmu-let-7i	1.1365	8.6276	6.38067	0.00117101	0.0162477	-0.871401	Slc12a9	solute carrier family 12 (potassium/chloride transporters)	NM_031406	281371455	7	3115	GAGGUAG	3109	3UTR	0.0254	2		Adcy3	adenylate cyclase 3 (Adcy3)	NM_138305	226958590
mmu-let-7i	1.1365	8.6276	6.38067	0.00117101	0.0162477	-0.871401	Acad11	nephronophthisis 3 (adolescent) (Nphp3)	NM_028721	159131888	8	4588	UGAGGUAG	4581	3UTR	0.0253	1		Adcy6	adenylate cyclase 6 (Adcy6)	NM_007405	86604720
mmu-let-7i	1.1365	8.6276	6.38067	0.00117101	0.0162477	-0.871401	Il6	interleukin 6 (Il6)	NM_031168	13624310	7	991	UGAGGUA	985	3UTR	0.0253	1		Add1	adducin 1 (alpha) (Add1)	NM_001024458	156255170
mmu-let-7i	1.1365	8.6276	6.38067	0.00117101	0.0162477	-0.871401	Pla2g2f	phospholipase A2, group IIF (Pla2g2f)	NM_012045	254826798	8	1838	UGAGGUAG	1831	3UTR	0.0253	1		Add2	adducin 2 (beta) (Add2)	NM_013458	427918093
mmu-let-7i	1.1365	8.6276	6.38067	0.00117101	0.0162477	-0.871401	B3gat3	beta-1,3-glucuronyltransferase 3 (glucuronosyltransferase I) (B3gat3)	NM_024256	31980750	7	1560	GAGGUAG	1554	3UTR	0.0251	2		Adh4	alcohol dehydrogenase 4 (class II)	NM_011996	121247378
mmu-let-7i	1.1365	8.6276	6.38067	0.00117101	0.0162477	-0.871401	Nek3	NIMA (never in mitosis gene a)-related expressed kinase 3 (Nek3)	NM_011848	251823708	7	1891	GAGGUAG	1885	3UTR	0.025	2		Adh5	alcohol dehydrogenase 5 (class III)	NM_007410	568384758
mmu-let-7i	1.1365	8.6276	6.38067	0.00117101	0.0162477	-0.871401	Ccdc71	coiled-coil domain containing 71 (Ccdc71)	NM_133744	164519144	8	1996	GAGGUAGU	1989	3UTR	0.0249	2		Adi1	acireductone dioxygenase 1 (Adi1)	NM_134052	118129921
mmu-let-7i	1.1365	8.6276	6.38067	0.00117101	0.0162477	-0.871401	Aars2	alanyl-tRNA synthetase 2, mitochondrial (putative) (Aars2)	NM_198608	52630310	7	3298	GAGGUAG	3292	3UTR	0.0248	2		Adipoq	adiponectin, C1Q and collagen domain containing (Adipoq)	NM_009605	87252710
mmu-let-7i	1.1365	8.6276	6.38067	0.00117101	0.0162477	-0.871401	Crtap	cartilage associated protein (Crtap)	NM_019922	225543172	7	1385	UGAGGUA	1379	3UTR	0.0248	1		Adipor2	adiponectin receptor 2 (Adipor2)	NM_197985	118130777
mmu-let-7i	1.1365	8.6276	6.38067	0.00117101	0.0162477	-0.871401	Stab2	stabilin 2 (Stab2)	NM_138673	141801480	7	7870	UGAGGUA	7864	3UTR	0.0248	1		Adm	adrenomedullin (Adm)	NM_009627	6752987
mmu-let-7i	1.1365	8.6276	6.38067	0.00117101	0.0162477	-0.871401	Wdr18	WD repeat domain 18 (Wdr18)	NM_175450	141801725	8	1590	UGAGGUAG	1583	3UTR	0.0248	1		Adpgk	ADP-dependent glucokinase (Adpgk)	NM_028121	70780371
mmu-let-7i	1.1365	8.6276	6.38067	0.00117101	0.0162477	-0.871401	1700017B05Rik	RIKEN cDNA 1700017B05 gene (1700017B05Rik)	NM_028820	212549783	8	3580	UGAGGUAG	3573	3UTR	0.0247	1		Adra1a	adrenergic receptor, alpha 1a (Adra1a)	NM_013461	418203910
mmu-let-7i	1.1365	8.6276	6.38067	0.00117101	0.0162477	-0.871401	Bik	BCL2-interacting killer (Bik)	NM_007546	118131134	7	712	UGAGGUA	706	3UTR	0.0247	1		Adra1b	adrenergic receptor, alpha 1b (Adra1b)	NM_007416	548923932
mmu-let-7i	1.1365	8.6276	6.38067	0.00117101	0.0162477	-0.871401	Dnaja4	DnaJ (Hsp40) homolog, subfamily A, member 4 (Dnaja4)	NM_021422	299890777	8	2507	UGAGGUAG	2500	3UTR	0.0247	1		Adra1d	adrenergic receptor, alpha 1d (Adra1d)	NM_013460	110347546
mmu-let-7i	1.1365	8.6276	6.38067	0.00117101	0.0162477	-0.871401	Fga	fibrinogen alpha chain (Fga)	NM_010196	167555025	8	2694	GAGGUAGU	2687	3UTR	0.0247	2		Adra2b	adrenergic receptor, alpha 2b (Adra2b)	NM_009633	111548655
mmu-let-7i	1.1365	8.6276	6.38067	0.00117101	0.0162477	-0.871401	Gpatch3	G patch domain containing 3 (Gpatch3)	NM_172876	141802392	7	1720	GAGGUAG	1714	3UTR	0.0247	2		Adrb1	adrenergic receptor, beta 1 (Adrb1)	NM_007419	158517826
mmu-let-7i	1.1365	8.6276	6.38067	0.00117101	0.0162477	-0.871401	Hmgcl	3-hydroxy-3-methylglutaryl-Coenzyme A lyase (Hmgcl)	NM_008254	171543857	7	1253	GAGGUAG	1247	3UTR	0.0247	2		Adrb2	adrenergic receptor, beta 2 (Adrb2)	NM_007420	480306395
mmu-let-7i	1.1365	8.6276	6.38067	0.00117101	0.0162477	-0.871401	Hsd3b2	hydroxy-delta-5-steroid dehydrogenase, 3 beta- and steroid delta-isomerase 2 (Hsd3b2)	NM_153193	162461558	7	1752	UGAGGUA	1746	3UTR	0.0247	1		Adrb3	adrenergic receptor, beta 3 (Adrb3)	NM_013462	133891719
mmu-let-7i	1.1365	8.6276	6.38067	0.00117101	0.0162477	-0.871401	Hsd3b2	hydroxy-delta-5-steroid dehydrogenase, 3 beta- and steroid delta-isomerase 2 (Hsd3b2)	NM_153193	162461558	7	1643	UGAGGUA	1637	3UTR	0.0247	1		Aebp2	AE binding protein 2 (Aebp2)	NM_001005605	54112426
mmu-let-7i	1.1365	8.6276	6.38067	0.00117101	0.0162477	-0.871401	Taf9b	TAF9B RNA polymerase II, TATA box binding protein (TBP)-associated factor (Taf9b)	NM_001001176	269784724	8	2257	UGAGGUAG	2250	3UTR	0.0247	1		Afap1l2	actin filament associated protein 1-like 2 (Afap1l2)	NM_146102	295317355
mmu-let-7i	1.1365	8.6276	6.38067	0.00117101	0.0162477	-0.871401	Wnt3a	wingless-type MMTV integration site family, member 3A (Wnt3a)	NM_009522	226958415	8	1459	UGAGGUAG	1452	3UTR	0.0245	1		Aff4	AF4/FMR2 family, member 4 (Aff4)	NM_033565	254281255
mmu-let-7i	1.1365	8.6276	6.38067	0.00117101	0.0162477	-0.871401	Med10	mediator complex subunit 10 (Med10)	NM_138596	142374083	7	558	GAGGUAG	552	3UTR	0.0244	2		Afg3l2	AFG3-like AAA ATPase 2 (Afg3l2)	NM_027130	110625760
mmu-let-7i	1.1365	8.6276	6.38067	0.00117101	0.0162477	-0.871401	Bcat1	branched chain aminotransferase 1, cytosolic (Bcat1)	NM_007532	209447050	9	7654	UGAGGUAGU	7646	3UTR	0.0243	1		Afmid	arylformamidase (Afmid)	NM_027827	281332127
mmu-let-7i	1.1365	8.6276	6.38067	0.00117101	0.0162477	-0.871401	Orc3l	origin recognition complex, subunit 3 (Orc3)	NM_015824	227116260	8	4626	UGAGGUAG	4619	3UTR	0.0243	1		Afp	alpha fetoprotein (Afp)	NM_007423	163310737
mmu-let-7i	1.1365	8.6276	6.38067	0.00117101	0.0162477	-0.871401	Agpat6	1-acylglycerol-3-phosphate O-acyltransferase 6 (lysophosphatidic acid acyltransferase, zeta) (Agpat6)	NM_018743	227908857	8	2995	UGAGGUAG	2988	3UTR	0.0242	1		Agpat4	1-acylglycerol-3-phosphate O-acyltransferase 4 (lysophosphatidic acid acyltransferase, delta) (Agpat4)	NM_026644	141802840
mmu-let-7i	1.1365	8.6276	6.38067	0.00117101	0.0162477	-0.871401	Efhd2	EF hand domain containing 2 (Efhd2)	NM_025994	141803228	8	1353	UGAGGUAG	1346	3UTR	0.0242	1		Agpat6	1-acylglycerol-3-phosphate O-acyltransferase 6 (lysophosphatidic acid acyltransferase, zeta) (Agpat6)	NM_018743	227908857
mmu-let-7i	1.1365	8.6276	6.38067	0.00117101	0.0162477	-0.871401	Sema4f	sema domain, immunoglobulin domain (Ig)	NM_011350	164698453	8	4012	UGAGGUAG	4005	3UTR	0.0242	1		Agr2	anterior gradient 2 (Agr2)	NM_011783	118130044
mmu-let-7i	1.1365	8.6276	6.38067	0.00117101	0.0162477	-0.871401	Arhgef15	Rho guanine nucleotide exchange factor (GEF) 15 (Arhgef15)	NM_177566	60279699	8	2751	GAGGUAGU	2744	3UTR	0.0241	2		Agrn	agrin (Agrn)	NM_021604	344217722
mmu-let-7i	1.1365	8.6276	6.38067	0.00117101	0.0162477	-0.871401	Map4k4	mitogen-activated protein kinase kinase kinase kinase 4 (Map4k4)	NM_008696	145279236	8	5005	UGAGGUAG	4998	3UTR	0.0241	1		Agt	angiotensinogen (serpin peptidase inhibitor, clade A, member 8) (Agt)	NM_007428	113461997
mmu-let-7i	1.1365	8.6276	6.38067	0.00117101	0.0162477	-0.871401	Trappc9	trafficking protein particle complex 9 (Trappc9)	NM_180662	257467574	7	4048	UGAGGUA	4042	3UTR	0.024	1		Agtr1a	angiotensin II receptor, type 1a (Agtr1a)	NM_177322	158937294
mmu-let-7i	1.1365	8.6276	6.38067	0.00117101	0.0162477	-0.871401	Arid3c	AT rich interactive domain 3C (BRIGHT-like) (Arid3c)	NM_001017362	134244289	7	1523	GAGGUAG	1517	3UTR	0.0239	2		Agtrl1	apelin receptor (Aplnr)	NM_011784	213385259
mmu-let-7i	1.1365	8.6276	6.38067	0.00117101	0.0162477	-0.871401	Igf2bp1	insulin-like growth factor 2 mRNA binding protein 1 (Igf2bp1)	NM_009951	169234738	9	6782	UGAGGUAGU	6774	3UTR	0.0239	1		Agxt2l2	5-phosphohydroxy-L-lysine phospholyase (Phykpl)	NM_028398	146260274
mmu-let-7i	1.1365	8.6276	6.38067	0.00117101	0.0162477	-0.871401	Igf2bp1	insulin-like growth factor 2 mRNA binding protein 1 (Igf2bp1)	NM_009951	169234738	9	6188	UGAGGUAGU	6180	3UTR	0.0239	1		Ahctf1	AT hook containing transcription factor 1 (Ahctf1)	NM_026375	158508459
mmu-let-7i	1.1365	8.6276	6.38067	0.00117101	0.0162477	-0.871401	Igf2bp1	insulin-like growth factor 2 mRNA binding protein 1 (Igf2bp1)	NM_009951	169234738	9	3767	UGAGGUAGU	3759	3UTR	0.0239	1		Ahcyl2	S-adenosylhomocysteine hydrolase-like 2 (Ahcyl2)	NM_021414	342307098
mmu-let-7i	1.1365	8.6276	6.38067	0.00117101	0.0162477	-0.871401	P4ha2	procollagen-proline, 2-oxoglutarate 4-dioxygenase (proline 4-hydroxylase)	NM_011031	226874875	7	2148	UGAGGUA	2142	3UTR	0.0235	1		Ahsa1	AHA1, activator of heat shock protein ATPase 1 (Ahsa1)	NM_146036	22122514
mmu-let-7i	1.1365	8.6276	6.38067	0.00117101	0.0162477	-0.871401	Klk10	kallikrein related-peptidase 10 (Klk10)	NM_133712	118130936	7	1231	GAGGUAG	1225	3UTR	0.0234	2		Ahsg	alpha-2-HS-glycoprotein (Ahsg)	NM_013465	451172062
mmu-let-7i	1.1365	8.6276	6.38067	0.00117101	0.0162477	-0.871401	Klk10	kallikrein related-peptidase 10 (Klk10)	NM_133712	118130936	7	1142	GAGGUAG	1136	3UTR	0.0234	2		AI118078	expressed sequence AI118078 (AI118078)	NM_172923	146198553
mmu-let-7i	1.1365	8.6276	6.38067	0.00117101	0.0162477	-0.871401	Cacnb4	calcium channel, voltage-dependent, beta 4 subunit (Cacnb4)	NM_001037099	549806787	9	5357	GAGGUAGUA	5349	3UTR	0.0233	2		AI132487	solute carrier family 25, member 47 (Slc25a47)	NM_001012310	226958602
mmu-let-7i	1.1365	8.6276	6.38067	0.00117101	0.0162477	-0.871401	Fgfbp1	fibroblast growth factor binding protein 1 (Fgfbp1)	NM_008009	410025490	7	1032	UGAGGUA	1026	3UTR	0.0233	1		AI314976	O-acyl-ADP-ribose deacylase 1 (Oard1)	NM_207219	575501615
mmu-let-7i	1.1365	8.6276	6.38067	0.00117101	0.0162477	-0.871401	Lbr	lamin B receptor (Lbr)	NM_133815	229608894	8	2721	UGAGGUAG	2714	3UTR	0.0233	1		AI427515	vesicle amine transport protein 1 homolog-like (T. californica) (Vat1l)	NM_173016	118129925
mmu-let-7i	1.1365	8.6276	6.38067	0.00117101	0.0162477	-0.871401	Trpm6	transient receptor potential cation channel, subfamily M, member 6 (Trpm6)	NM_153417	23510304	7	6436	UGAGGUA	6430	3UTR	0.0232	1		AI429214	expressed sequence AI429214 (AI429214)	NM_001039220	224493787
mmu-let-7i	1.1365	8.6276	6.38067	0.00117101	0.0162477	-0.871401	Dmrtc2	doublesex and mab-3 related transcription factor like family C2 (Dmrtc2)	NM_027732	298286496	7	1253	GAGGUAG	1247	3UTR	0.023	2		AI595366	leucine rich repeat containing 14B (Lrrc14b)	NM_001033042	146198870
mmu-let-7i	1.1365	8.6276	6.38067	0.00117101	0.0162477	-0.871401	EG434179	predicted gene 5595 (Gm5595)	NM_001008427	56606034	8	3114	UGAGGUAG	3107	3UTR	0.023	1		AI597468	transmembrane protein 263 (Tmem263)	NM_001013028	227430350
mmu-let-7i	1.1365	8.6276	6.38067	0.00117101	0.0162477	-0.871401	Rrp12	ribosomal RNA processing 12 homolog (S. cerevisiae) (Rrp12)	NM_199447	40804766	7	4192	GAGGUAG	4186	3UTR	0.0229	2		AI747699	lipase, member O1 (Lipo1)	NM_001013770	142375244
mmu-let-7i	1.1365	8.6276	6.38067	0.00117101	0.0162477	-0.871401	2010109I03Rik	RIKEN cDNA 2010109I03 gene (2010109I03Rik)	NM_025929	114842381	8	868	GAGGUAGU	861	3UTR	0.0228	2		AI837181	expressed sequence AI837181 (AI837181)	NM_134149	208431788
mmu-let-7i	1.1365	8.6276	6.38067	0.00117101	0.0162477	-0.871401	Hsd3b3	hydroxy-delta-5-steroid dehydrogenase, 3 beta- and steroid delta-isomerase 3 (Hsd3b3)	NM_001012306	240120131	7	1443	UGAGGUA	1437	3UTR	0.0228	1		AI846148	expressed sequence AI846148 (AI846148)	NM_001033139	268370247
mmu-let-7i	1.1365	8.6276	6.38067	0.00117101	0.0162477	-0.871401	Hsd3b3	hydroxy-delta-5-steroid dehydrogenase, 3 beta- and steroid delta-isomerase 3 (Hsd3b3)	NM_001012306	240120131	7	1331	UGAGGUA	1325	3UTR	0.0228	1		Aipl1	aryl hydrocarbon receptor-interacting protein-like 1 (Aipl1)	NM_053245	165932347
mmu-let-7i	1.1365	8.6276	6.38067	0.00117101	0.0162477	-0.871401	1700129I04Rik	family with sequence similarity 154, member B (Fam154b)	NM_177894	134288849	8	2001	UGAGGUAG	1994	3UTR	0.0227	1		AK122209	URB2 ribosome biogenesis 2 homolog (S. cerevisiae) (Urb2)	NM_001029876	71274161
mmu-let-7i	1.1365	8.6276	6.38067	0.00117101	0.0162477	-0.871401	Ctage5	CTAGE family, member 5 (Ctage5)	NM_146034	259155333	7	2683	UGAGGUA	2677	3UTR	0.0227	1		AK220484	growth regulation by estrogen in breast cancer-like (Greb1l)	NM_001083628	134947987
mmu-let-7i	1.1365	8.6276	6.38067	0.00117101	0.0162477	-0.871401	Dtx2	deltex 2 homolog (Drosophila) (Dtx2)	NM_023742	368711284	7	2424	GAGGUAG	2418	3UTR	0.0227	2		Ak3	adenylate kinase 3 (Ak3)	NM_021299	23956103
mmu-let-7i	1.1365	8.6276	6.38067	0.00117101	0.0162477	-0.871401	Frmd4b	FERM domain containing 4B (Frmd4b)	NM_145148	172088096	8	4563	GAGGUAGU	4556	3UTR	0.0227	2		Ak3l1	adenylate kinase 4 (Ak4)	NM_009647	294862287
mmu-let-7i	1.1365	8.6276	6.38067	0.00117101	0.0162477	-0.871401	Idi2	isopentenyl-diphosphate delta isomerase 2 (Idi2)	NM_177197	149363647	8	1251	UGAGGUAG	1244	3UTR	0.0227	1		Akap2	paralemmin 2 (Palm2)	NM_172868	310772262
mmu-let-7i	1.1365	8.6276	6.38067	0.00117101	0.0162477	-0.871401	Hsd3b6	hydroxy-delta-5-steroid dehydrogenase, 3 beta- and steroid delta-isomerase 6 (Hsd3b6)	NM_013821	162461882	7	1802	UGAGGUA	1796	3UTR	0.0226	1		Akap7	A kinase (PRKA) anchor protein 7 (Akap7)	NM_018747	145864492
mmu-let-7i	1.1365	8.6276	6.38067	0.00117101	0.0162477	-0.871401	Hsd3b6	hydroxy-delta-5-steroid dehydrogenase, 3 beta- and steroid delta-isomerase 6 (Hsd3b6)	NM_013821	162461882	7	1690	UGAGGUA	1684	3UTR	0.0226	1		Akap8	A kinase (PRKA) anchor protein 8 (Akap8)	NM_019774	146135004
mmu-let-7i	1.1365	8.6276	6.38067	0.00117101	0.0162477	-0.871401	Gnptab	N-acetylglucosamine-1-phosphate transferase, alpha and beta subunits (Gnptab)	NM_001004164	84579826	8	3745	UGAGGUAG	3738	3UTR	0.0225	1		Akirin2	akirin 2 (Akirin2)	NM_001007589	87080824
mmu-let-7i	1.1365	8.6276	6.38067	0.00117101	0.0162477	-0.871401	Bcl2l1	BCL2-like 1 (Bcl2l1)	NM_009743	577019437	8	1848	UGAGGUAG	1841	3UTR	0.0223	1		Akna	AT-hook transcription factor (Akna)	NM_001045514	167830455
mmu-let-7i	1.1365	8.6276	6.38067	0.00117101	0.0162477	-0.871401	Dlgap4	discs, large homolog-associated protein 4 (Drosophila) (Dlgap4)	NM_146128	464397380	8	4815	UGAGGUAG	4808	3UTR	0.0223	1		Akr1c14	aldo-keto reductase family 1, member C14 (Akr1c14)	NM_134072	19527293
mmu-let-7i	1.1365	8.6276	6.38067	0.00117101	0.0162477	-0.871401	Gga3	golgi associated, gamma adaptin ear containing, ARF binding protein 3 (Gga3)	NM_173048	355390231	8	2938	GAGGUAGU	2931	3UTR	0.0223	2		Akr1e1	aldo-keto reductase family 1, member E1 (Akr1e1)	NM_018859	93277107
mmu-let-7i	1.1365	8.6276	6.38067	0.00117101	0.0162477	-0.871401	Pqlc2	PQ loop repeat containing 2 (Pqlc2)	NM_145384	253970449	8	2677	UGAGGUAG	2670	3UTR	0.0223	1		Akt1	thymoma viral proto-oncogene 1 (Akt1)	NM_009652	260166604
mmu-let-7i	1.1365	8.6276	6.38067	0.00117101	0.0162477	-0.871401	Cdc34	cell division cycle 34 (Cdc34)	NM_177613	31341237	7	964	UGAGGUA	958	3UTR	0.0222	1		Akt1s1	AKT1 substrate 1 (proline-rich) (Akt1s1)	NM_026270	359807106
mmu-let-7i	1.1365	8.6276	6.38067	0.00117101	0.0162477	-0.871401	Pank2	pantothenate kinase 2 (Pank2)	NM_153501	227496251	7	4193	GAGGUAG	4187	3UTR	0.0222	2		Akt2	thymoma viral proto-oncogene 2 (Akt2)	NM_007434	158937313
mmu-let-7i	1.1365	8.6276	6.38067	0.00117101	0.0162477	-0.871401	Tnfaip8l3	tumor necrosis factor, alpha-induced protein 8-like 3 (Tnfaip8l3)	NM_001033535	160333219	8	1129	GAGGUAGU	1122	3UTR	0.0222	2		Akt3	thymoma viral proto-oncogene 3 (Akt3)	NM_011785	190883483
mmu-let-7i	1.1365	8.6276	6.38067	0.00117101	0.0162477	-0.871401	Dll3	delta-like 3 (Drosophila) (Dll3)	NM_007866	116292183	7	1891	GAGGUAG	1885	3UTR	0.0221	2		AL365322.1	RIKEN cDNA A130010J15 gene (A130010J15Rik)	NM_181048	237858814
mmu-let-7i	1.1365	8.6276	6.38067	0.00117101	0.0162477	-0.871401	Dzip1l	DAZ interacting protein 1-like (Dzip1l)	NM_028258	118130444	8	3186	GAGGUAGU	3179	3UTR	0.0219	2		AL450317.13	centrosomal protein 63 (Cep63)	NM_001081122	124487470
mmu-let-7i	1.1365	8.6276	6.38067	0.00117101	0.0162477	-0.871401	Pld3	phospholipase D family, member 3 (Pld3)	NM_011116	7242180	7	2022	GAGGUAG	2016	3UTR	0.0219	2		AL592187.17	apolipoprotein L 9b (Apol9b)	NM_173743	274326576
mmu-let-7i	1.1365	8.6276	6.38067	0.00117101	0.0162477	-0.871401	Rassf7	Ras association (RalGDS/AF-6) domain family (N-terminal) member 7 (Rassf7)	NM_025886	118403309	7	1467	UGAGGUA	1461	3UTR	0.0219	1		Aldh18a1	aldehyde dehydrogenase 18 family, member A1 (Aldh18a1)	NM_019698	255958291
mmu-let-7i	1.1365	8.6276	6.38067	0.00117101	0.0162477	-0.871401	1110037F02Rik	RIKEN cDNA 1110037F02 gene (1110037F02Rik)	NM_001081183	124487144	8	6285	GAGGUAGU	6278	3UTR	0.0218	2		Aldh1b1	aldehyde dehydrogenase 1 family, member B1 (Aldh1b1)	NM_028270	144922649
mmu-let-7i	1.1365	8.6276	6.38067	0.00117101	0.0162477	-0.871401	Ahctf1	AT hook containing transcription factor 1 (Ahctf1)	NM_026375	158508459	8	7950	UGAGGUAG	7943	3UTR	0.0216	1		Aldh1l2	aldehyde dehydrogenase 1 family, member L2 (Aldh1l2)	NM_153543	283436217
mmu-let-7i	1.1365	8.6276	6.38067	0.00117101	0.0162477	-0.871401	Pde12	phosphodiesterase 12 (Pde12)	NM_178668	40538841	8	2563	GAGGUAGU	2556	3UTR	0.0216	2		Aldh3a2	aldehyde dehydrogenase family 3, subfamily A2 (Aldh3a2)	NM_007437	692314724
mmu-let-7i	1.1365	8.6276	6.38067	0.00117101	0.0162477	-0.871401	X99384	phosphatase domain containing, paladin 1 (Pald1)	NM_013753	171846273	8	4177	UGAGGUAG	4170	3UTR	0.0216	1		Aldh3b1	aldehyde dehydrogenase 3 family, member B1 (Aldh3b1)	NM_026316	34328287
mmu-let-7i	1.1365	8.6276	6.38067	0.00117101	0.0162477	-0.871401	Isg20l1	apoptosis enhancing nuclease (Aen)	NM_026531	242397469	8	1567	UGAGGUAG	1560	3UTR	0.0214	1		Aldh5a1	aldhehyde dehydrogenase family 5, subfamily A1 (Aldh5a1)	NM_172532	281427161
mmu-let-7i	1.1365	8.6276	6.38067	0.00117101	0.0162477	-0.871401	Pla1a	phospholipase A1 member A (Pla1a)	NM_134102	164519079	7	1892	UGAGGUA	1886	3UTR	0.0214	1		Aldh9a1	aldehyde dehydrogenase 9, subfamily A1 (Aldh9a1)	NM_019993	115334670
mmu-let-7i	1.1365	8.6276	6.38067	0.00117101	0.0162477	-0.871401	Elf4	E74-like factor 4 (ets domain transcription factor) (Elf4)	NM_019680	225543335	8	3712	GAGGUAGU	3705	3UTR	0.0213	2		Aldoa	aldolase A, fructose-bisphosphate (Aldoa)	NM_007438	293597565
mmu-let-7i	1.1365	8.6276	6.38067	0.00117101	0.0162477	-0.871401	Gp49a	glycoprotein 49 A (Gp49a)	NM_008147	631226388	7	1178	UGAGGUA	1172	3UTR	0.0213	1		Alg11	asparagine-linked glycosylation 11 (alpha-1,2-mannosyltransferase) (Alg11)	NM_183142	341926301
mmu-let-7i	1.1365	8.6276	6.38067	0.00117101	0.0162477	-0.871401	Sema4g	sema domain, immunoglobulin domain (Ig)	NM_011976	6755461	8	3978	UGAGGUAG	3971	3UTR	0.0212	1		Alg13	asparagine-linked glycosylation 13 (Alg13)	NM_026247	283436185
mmu-let-7i	1.1365	8.6276	6.38067	0.00117101	0.0162477	-0.871401	Calm4	calmodulin 4 (Calm4)	NM_020036	148352321	7	873	GAGGUAG	867	3UTR	0.0211	2		Alg2	asparagine-linked glycosylation 2 (alpha-1,3-mannosyltransferase) (Alg2)	NM_019998	172072656
mmu-let-7i	1.1365	8.6276	6.38067	0.00117101	0.0162477	-0.871401	Eps8l3	EPS8-like 3 (Eps8l3)	NM_133867	254039730	7	2151	UGAGGUA	2145	3UTR	0.0211	1		Alg9	asparagine-linked glycosylation 9 (alpha 1,2 mannosyltransferase) (Alg9)	NM_133981	359427499
mmu-let-7i	1.1365	8.6276	6.38067	0.00117101	0.0162477	-0.871401	Mrps25	mitochondrial ribosomal protein S25 (Mrps25)	NM_025578	118130303	9	5071	UGAGGUAGU	5063	3UTR	0.0208	1		Alkbh5	alkB, alkylation repair homolog 5 (E. coli) (Alkbh5)	NM_172943	169234735
mmu-let-7i	1.1365	8.6276	6.38067	0.00117101	0.0162477	-0.871401	Ovgp1	oviductal glycoprotein 1 (Ovgp1)	NM_007696	34328545	7	2425	UGAGGUA	2419	3UTR	0.0208	1		Alox12b	arachidonate 12-lipoxygenase, 12R type (Alox12b)	NM_009659	118130321
mmu-let-7i	1.1365	8.6276	6.38067	0.00117101	0.0162477	-0.871401	Trim71	tripartite motif-containing 71 (Trim71)	NM_001042503	274317082	8	4088	UGAGGUAG	4081	3UTR	0.0208	1		Alox5	arachidonate 5-lipoxygenase (Alox5)	NM_009662	116686109
mmu-let-7i	1.1365	8.6276	6.38067	0.00117101	0.0162477	-0.871401	Trim71	tripartite motif-containing 71 (Trim71)	NM_001042503	274317082	8	3992	UGAGGUAG	3985	3UTR	0.0208	1		Alox8	arachidonate 8-lipoxygenase (Alox8)	NM_009661	443906715
mmu-let-7i	1.1365	8.6276	6.38067	0.00117101	0.0162477	-0.871401	E2f6	E2F transcription factor 6 (E2f6)	NM_033270	237681137	8	2103	UGAGGUAG	2096	3UTR	0.0207	1		Als2	amyotrophic lateral sclerosis 2 (juvenile) (Als2)	NM_028717	237757294
mmu-let-7i	1.1365	8.6276	6.38067	0.00117101	0.0162477	-0.871401	Dnajb6	DnaJ (Hsp40) homolog, subfamily B, member 6 (Dnajb6)	NM_001037940	188219639	8	1741	GAGGUAGU	1734	3UTR	0.0206	2		Als2cr12	amyotrophic lateral sclerosis 2 (juvenile) chromosome region, candidate 12 (human) (Als2cr12)	NM_175370	183396793
mmu-let-7i	1.1365	8.6276	6.38067	0.00117101	0.0162477	-0.871401	Lrig3	leucine-rich repeats and immunoglobulin-like domains 3 (Lrig3)	NM_177152	283135156	7	3593	GAGGUAG	3587	3UTR	0.0205	2		Alx3	aristaless-like homeobox 3 (Alx3)	NM_007441	479277987
mmu-let-7i	1.1365	8.6276	6.38067	0.00117101	0.0162477	-0.871401	Slc25a18	solute carrier family 25 (mitochondrial carrier)	NM_001081048	153791934	7	1140	GAGGUAG	1134	3UTR	0.0205	2		Ammecr1l	AMME chromosomal region gene 1-like (Ammecr1l)	NM_153515	334848169
mmu-let-7i	1.1365	8.6276	6.38067	0.00117101	0.0162477	-0.871401	Slc8a2	solute carrier family 8 (sodium/calcium exchanger)	NM_148946	40254192	8	3519	GAGGUAGU	3512	3UTR	0.0204	2		Amotl1	angiomotin-like 1 (Amotl1)	NM_001081395	124487106
mmu-let-7i	1.1365	8.6276	6.38067	0.00117101	0.0162477	-0.871401	Mfsd8	major facilitator superfamily domain containing 8 (Mfsd8)	NM_028140	146141130	8	2448	UGAGGUAG	2441	3UTR	0.0203	1		Ampd2	adenosine monophosphate deaminase 2 (Ampd2)	NM_028779	576067747
mmu-let-7i	1.1365	8.6276	6.38067	0.00117101	0.0162477	-0.871401	Nme6	NME/NM23 nucleoside diphosphate kinase 6 (Nme6)	NM_018757	9055289	7	855	GAGGUAG	849	3UTR	0.0202	2		Anapc1	anaphase promoting complex subunit 1 (Anapc1)	NM_008569	228008322
mmu-let-7i	1.1365	8.6276	6.38067	0.00117101	0.0162477	-0.871401	Tarbp2	TAR (HIV) RNA binding protein 2 (Tarbp2)	NM_009319	359385731	7	1510	GAGGUAG	1504	3UTR	0.0202	2		Angptl2	angiopoietin-like 2 (Angptl2)	NM_011923	141803564
mmu-let-7i	1.1365	8.6276	6.38067	0.00117101	0.0162477	-0.871401	Tcte1	t-complex-associated testis expressed 1 (Tcte1)	NM_013688	124430563	8	2687	UGAGGUAG	2680	3UTR	0.0202	1		Angptl7	angiopoietin-like 7 (Angptl7)	NM_001039554	146198798
mmu-let-7i	1.1365	8.6276	6.38067	0.00117101	0.0162477	-0.871401	3110048E14Rik	family with sequence similarity 118, member A (Fam118a)	NM_133750	226051884	8	1514	UGAGGUAG	1507	3UTR	0.0201	1		Ank3	ankyrin 3, epithelial (Ank3)	NM_146005	116256496
mmu-let-7i	1.1365	8.6276	6.38067	0.00117101	0.0162477	-0.871401	Marveld2	MARVEL (membrane-associating) domain containing 2 (Marveld2)	NM_001038602	283806703	8	2014	UGAGGUAG	2007	3UTR	0.0201	1		Ankk1	ankyrin repeat and kinase domain containing 1 (Ankk1)	NM_172922	146198787
mmu-let-7i	1.1365	8.6276	6.38067	0.00117101	0.0162477	-0.871401	Penk1	preproenkephalin (Penk)	NM_001002927	141801808	7	1342	UGAGGUA	1336	3UTR	0.0201	1		Ankrd12	ankyrin repeat domain 12 (Ankrd12)	NM_001025572	71834682
mmu-let-7i	1.1365	8.6276	6.38067	0.00117101	0.0162477	-0.871401	Ogfr	opioid growth factor receptor (Ogfr)	NM_031373	258679483	7	2102	UGAGGUA	2096	3UTR	0.02	1		Ankrd34a	ankyrin repeat domain 34A (Ankrd34a)	NM_001024851	122114647
mmu-let-7i	1.1365	8.6276	6.38067	0.00117101	0.0162477	-0.871401	Zfp202	zinc finger protein 202 (Zfp202)	NM_030713	257796268	8	2343	UGAGGUAG	2336	3UTR	0.02	1		Ankrd49	ankyrin repeat domain 49 (Ankrd49)	NM_019683	141803047
mmu-let-7i	1.1365	8.6276	6.38067	0.00117101	0.0162477	-0.871401	Abcc5	ATP-binding cassette, sub-family C (CFTR/MRP)	NM_013790	66932953	8	5595	UGAGGUAG	5588	3UTR	0.0199	1		Ankrd52	ankyrin repeat domain 52 (Ankrd52)	NM_172790	118129954
mmu-let-7i	1.1365	8.6276	6.38067	0.00117101	0.0162477	-0.871401	Snx16	sorting nexin 16 (Snx16)	NM_029068	560186547	8	2083	GAGGUAGU	2076	3UTR	0.0199	2		Ankrd56	sosondowah ankyrin repeat domain family member B (Sowahb)	NM_175270	146149167
mmu-let-7i	1.1365	8.6276	6.38067	0.00117101	0.0162477	-0.871401	Atp6v0a1	ATPase, H+ transporting, lysosomal V0 subunit A1 (Atp6v0a1)	NM_016920	340007373	8	3684	UGAGGUAG	3677	3UTR	0.0198	1		Ankrd6	ankyrin repeat domain 6 (Ankrd6)	NM_001012450	60218879
mmu-let-7i	1.1365	8.6276	6.38067	0.00117101	0.0162477	-0.871401	Ccdc93	coiled-coil domain containing 93 (Ccdc93)	NM_001025156	160333438	9	5087	GAGGUAGUA	5079	3UTR	0.0198	2		Ankrd7	ankyrin repeat domain 7 (Ankrd7)	NM_029202	268370073
mmu-let-7i	1.1365	8.6276	6.38067	0.00117101	0.0162477	-0.871401	Esr2	estrogen receptor 2 (beta) (Esr2)	NM_207707	46877095	8	2510	UGAGGUAG	2503	3UTR	0.0198	1		Ankrd9	ankyrin repeat domain 9 (Ankrd9)	NM_175207	141802286
mmu-let-7i	1.1365	8.6276	6.38067	0.00117101	0.0162477	-0.871401	Gpr137	G protein-coupled receptor 137 (Gpr137)	NM_207220	293629308	7	1676	GAGGUAG	1670	3UTR	0.0198	2		Anks1	ankyrin repeat and SAM domain containing 1 (Anks1)	NM_181413	553727041
mmu-let-7i	1.1365	8.6276	6.38067	0.00117101	0.0162477	-0.871401	Igsf9	immunoglobulin superfamily, member 9 (Igsf9)	NM_033608	224809499	7	3952	GAGGUAG	3946	3UTR	0.0198	2		Ano10	anoctamin 10 (Ano10)	NM_133979	428673527
mmu-let-7i	1.1365	8.6276	6.38067	0.00117101	0.0162477	-0.871401	Ncoa1	nuclear receptor coactivator 1 (Ncoa1)	NM_010881	236466065	7	6646	GAGGUAG	6640	3UTR	0.0197	2		Ano2	anoctamin 2 (Ano2)	NM_153589	209862775
mmu-let-7i	1.1365	8.6276	6.38067	0.00117101	0.0162477	-0.871401	Rbm4	RNA binding motif protein 4 (Rbm4)	NM_009032	588282782	8	2205	GAGGUAGU	2198	3UTR	0.0197	2		Ano4	anoctamin 4	NM_178773	52546978
mmu-let-7i	1.1365	8.6276	6.38067	0.00117101	0.0162477	-0.871401	Actr5	ARP5 actin-related protein 5 (Actr5)	NM_175419	91176334	7	2217	GAGGUAG	2211	3UTR	0.0196	2		Ano5	anoctamin 5 (Ano5)	NM_177694	428673537
mmu-let-7i	1.1365	8.6276	6.38067	0.00117101	0.0162477	-0.871401	Col24a1	collagen, type XXIV, alpha 1 (Col24a1)	NM_027770	116326000	8	6316	GAGGUAGU	6309	3UTR	0.0196	2		Ano7	anoctamin 7 (Ano7)	NM_207031	428978409
mmu-let-7i	1.1365	8.6276	6.38067	0.00117101	0.0162477	-0.871401	Abi3	ABI gene family, member 3 (Abi3)	NM_025659	254750622	7	1226	GAGGUAG	1220	3UTR	0.0195	2		Anxa7	annexin A7 (Anxa7)	NM_009674	160707955
mmu-let-7i	1.1365	8.6276	6.38067	0.00117101	0.0162477	-0.871401	Itgad	integrin, alpha D (Itgad)	NM_001029872	294997268	7	3662	GAGGUAG	3656	3UTR	0.0195	2		Aoc2	amine oxidase, copper containing 2 (retina-specific) (Aoc2)	NM_178932	34098971
mmu-let-7i	1.1365	8.6276	6.38067	0.00117101	0.0162477	-0.871401	Prss22	protease, serine 22 (Prss22)	NM_133731	160333643	7	1083	GAGGUAG	1077	3UTR	0.0195	2		Aox1	aldehyde oxidase 1 (Aox1)	NM_009676	110347466
mmu-let-7i	1.1365	8.6276	6.38067	0.00117101	0.0162477	-0.871401	Rabl3	RAB, member RAS oncogene family-like 3 (Rabl3)	NM_001042499	109948289	8	848	UGAGGUAG	841	3UTR	0.0195	1		Aox4	aldehyde oxidase 4 (Aox4)	NM_023631	114205421
mmu-let-7i	1.1365	8.6276	6.38067	0.00117101	0.0162477	-0.871401	Tfb1m	transcription factor B1, mitochondrial (Tfb1m)	NM_146074	22122568	7	1120	GAGGUAG	1114	3UTR	0.0195	2		Ap1m2	adaptor protein complex AP-1, mu 2 subunit (Ap1m2)	NM_009678	160333507
mmu-let-7i	1.1365	8.6276	6.38067	0.00117101	0.0162477	-0.871401	Als2	amyotrophic lateral sclerosis 2 (juvenile) (Als2)	NM_028717	237757294	8	5962	UGAGGUAG	5955	3UTR	0.0194	1		Ap1s1	adaptor protein complex AP-1, sigma 1 (Ap1s1)	NM_007457	118131012
mmu-let-7i	1.1365	8.6276	6.38067	0.00117101	0.0162477	-0.871401	Pcdh19	protocadherin 19 (Pcdh19)	NM_001105245	157426848	9	7152	GAGGUAGUA	7144	3UTR	0.0194	2		Ap2a2	adaptor-related protein complex 2, alpha 2 subunit (Ap2a2)	NM_007459	163644276
mmu-let-7i	1.1365	8.6276	6.38067	0.00117101	0.0162477	-0.871401	Tm4sf5	transmembrane 4 superfamily member 5 (Tm4sf5)	NM_029360	238550161	7	672	UGAGGUA	666	3UTR	0.0194	1		Ap2m1	adaptor-related protein complex 2, mu 1 subunit (Ap2m1)	NM_009679	133892644
mmu-let-7i	1.1365	8.6276	6.38067	0.00117101	0.0162477	-0.871401	Arv1	ARV1 homolog (yeast) (Arv1)	NM_026855	158508696	7	861	GAGGUAG	855	3UTR	0.0193	2		Ap3s2	adaptor-related protein complex 3, sigma 2 subunit (Ap3s2)	NM_009682	160707970
mmu-let-7i	1.1365	8.6276	6.38067	0.00117101	0.0162477	-0.871401	Gale	galactose-4-epimerase, UDP (Gale)	NM_178389	118130587	7	1311	GAGGUAG	1305	3UTR	0.0193	2		Ap4e1	adaptor-related protein complex AP-4, epsilon 1 (Ap4e1)	NM_175550	124487334
mmu-let-7i	1.1365	8.6276	6.38067	0.00117101	0.0162477	-0.871401	Tcta	T cell leukemia translocation altered gene (Tcta)	NM_133986	31077076	8	1375	UGAGGUAG	1368	3UTR	0.0193	1		Apbb3	amyloid beta (A4) precursor protein-binding, family B, member 3 (Apbb3)	NM_146085	22122588
mmu-let-7i	1.1365	8.6276	6.38067	0.00117101	0.0162477	-0.871401	Rasl10a	RAS-like, family 10, member A (Rasl10a)	NM_145216	88853579	7	1025	GAGGUAG	1019	3UTR	0.0192	2		Apex2	apurinic/apyrimidinic endonuclease 2 (Apex2)	NM_029943	21541817
mmu-let-7i	1.1365	8.6276	6.38067	0.00117101	0.0162477	-0.871401	Slc35d2	solute carrier family 35, member D2 (Slc35d2)	NM_001001321	142369904	8	1147	UGAGGUAG	1140	3UTR	0.0192	1		Aph1c	anterior pharynx defective 1c homolog (C. elegans) (Aph1c)	NM_026674	118129861
mmu-let-7i	1.1365	8.6276	6.38067	0.00117101	0.0162477	-0.871401	Cdc37	cell division cycle 37 (Cdc37)	NM_016742	146134380	8	1997	GAGGUAGU	1990	3UTR	0.0191	2		Apitd1	apoptosis-inducing, TAF9-like domain 1 (Apitd1)	NM_027263	229892324
mmu-let-7i	1.1365	8.6276	6.38067	0.00117101	0.0162477	-0.871401	Dgka	diacylglycerol kinase, alpha (Dgka)	NM_016811	31560473	7	2553	GAGGUAG	2547	3UTR	0.0191	2		Apln	apelin (Apln)	NM_013912	123702126
mmu-let-7i	1.1365	8.6276	6.38067	0.00117101	0.0162477	-0.871401	Mrpl21	mitochondrial ribosomal protein L21 (Mrpl21)	NM_172252	142385334	7	750	GAGGUAG	744	3UTR	0.0191	2		Apob48r	apolipoprotein B receptor (Apobr)	NM_138310	19923862
mmu-let-7i	1.1365	8.6276	6.38067	0.00117101	0.0162477	-0.871401	Narg1l	N(alpha)-acetyltransferase 16, NatA auxiliary subunit (Naa16)	NM_025832	34328273	8	3555	GAGGUAGU	3548	3UTR	0.0191	2		Apobec2	apolipoprotein B mRNA editing enzyme, catalytic polypeptide 2 (Apobec2)	NM_009694	145966900
mmu-let-7i	1.1365	8.6276	6.38067	0.00117101	0.0162477	-0.871401	Slc5a9	solute carrier family 5 (sodium/glucose cotransporter)	NM_145551	240120079	8	2411	UGAGGUAG	2404	3UTR	0.0191	1		Apoc2	apolipoprotein C-II	NM_009695	158966683
mmu-let-7i	1.1365	8.6276	6.38067	0.00117101	0.0162477	-0.871401	Ubxn6	UBX domain protein 6 (Ubxn6)	NM_024432	31981252	7	1525	GAGGUAG	1519	3UTR	0.019	2		Apol10a	apolipoprotein L 10A (Apol10a)	NM_177744	158533979
mmu-let-7i	1.1365	8.6276	6.38067	0.00117101	0.0162477	-0.871401	Crct1	cysteine-rich C-terminal 1 (Crct1)	NM_028798	240848578	7	714	GAGGUAG	708	3UTR	0.0189	2		Apol10b	apolipoprotein L 10B (Apol10b)	NM_177820	238776829
mmu-let-7i	1.1365	8.6276	6.38067	0.00117101	0.0162477	-0.871401	Ercc2	excision repair cross-complementing rodent repair deficiency, complementation group 2 (Ercc2)	NM_007949	145966759	8	3488	UGAGGUAG	3481	3UTR	0.0189	1		Apol7c	apolipoprotein L 7c (Apol7c)	NM_175391	149363692
mmu-let-7i	1.1365	8.6276	6.38067	0.00117101	0.0162477	-0.871401	Prtg	protogenin homolog (Gallus gallus) (Prtg)	NM_175485	153945725	9	5466	GAGGUAGUA	5458	3UTR	0.0189	2		Appbp2	amyloid beta precursor protein (cytoplasmic tail) binding protein 2 (Appbp2)	NM_025825	133892350
mmu-let-7i	1.1365	8.6276	6.38067	0.00117101	0.0162477	-0.871401	Cpd	carboxypeptidase D (Cpd)	NM_007754	150378500	9	4833	GAGGUAGUA	4825	3UTR	0.0188	2		Aqp3	aquaporin 3 (Aqp3)	NM_016689	121949812
mmu-let-7i	1.1365	8.6276	6.38067	0.00117101	0.0162477	-0.871401	Styk1	serine/threonine/tyrosine kinase 1 (Styk1)	NM_172891	118129934	8	3287	UGAGGUAG	3280	3UTR	0.0188	1		Aqp4	aquaporin 4 (Aqp4)	NM_009700	160415210
mmu-let-7i	1.1365	8.6276	6.38067	0.00117101	0.0162477	-0.871401	Lrig1	leucine-rich repeats and immunoglobulin-like domains 1 (Lrig1)	NM_008377	88014688	8	3751	UGAGGUAG	3744	3UTR	0.0186	1		Aqp5	aquaporin 5 (Aqp5)	NM_009701	117940061
mmu-let-7i	1.1365	8.6276	6.38067	0.00117101	0.0162477	-0.871401	Mrpl34	mitochondrial ribosomal protein L34 (Mrpl34)	NM_053162	114145576	7	515	UGAGGUA	509	3UTR	0.0186	1		Aqp9	aquaporin 9 (Aqp9)	NM_022026	427973437
mmu-let-7i	1.1365	8.6276	6.38067	0.00117101	0.0162477	-0.871401	Sumf2	sulfatase modifying factor 2 (Sumf2)	NM_026445	142381003	8	1399	UGAGGUAG	1392	3UTR	0.0186	1		Arc	activity regulated cytoskeletal-associated protein (Arc)	NM_018790	451958115
mmu-let-7i	1.1365	8.6276	6.38067	0.00117101	0.0162477	-0.871401	2010002N04Rik	small integral membrane protein 3 (Smim3)	NM_134133	125991226	8	1000	UGAGGUAG	993	3UTR	0.0185	1		Arcn1	archain 1 (Arcn1)	NM_145985	148747409
mmu-let-7i	1.1365	8.6276	6.38067	0.00117101	0.0162477	-0.871401	Asgr2	asialoglycoprotein receptor 2 (Asgr2)	NM_007493	118131075	7	1152	GAGGUAG	1146	3UTR	0.0185	2		Arf2	ADP-ribosylation factor 2 (Arf2)	NM_007477	145966732
mmu-let-7i	1.1365	8.6276	6.38067	0.00117101	0.0162477	-0.871401	Habp4	hyaluronic acid binding protein 4 (Habp4)	NM_019986	160333782	8	1927	GAGGUAGU	1920	3UTR	0.0185	2		Arf3	ADP-ribosylation factor 3 (Arf3)	NM_007478	118131061
mmu-let-7i	1.1365	8.6276	6.38067	0.00117101	0.0162477	-0.871401	Oxa1l	oxidase assembly 1-like (Oxa1l)	NM_026936	146141106	8	1663	UGAGGUAG	1656	3UTR	0.0184	1		Arfgap1	ADP-ribosylation factor GTPase activating protein 1 (Arfgap1)	NM_145760	295148127
mmu-let-7i	1.1365	8.6276	6.38067	0.00117101	0.0162477	-0.871401	Zkscan2	zinc finger with KRAB and SCAN domains 2 (Zkscan2)	NM_001081329	124486744	8	4381	UGAGGUAG	4374	3UTR	0.0184	1		Arfgap2	ADP-ribosylation factor GTPase activating protein 2 (Arfgap2)	NM_023854	260763916
mmu-let-7i	1.1365	8.6276	6.38067	0.00117101	0.0162477	-0.871401	3200002M19Rik	anaphase prompoting complex C subunit 15 (Anapc15)	NM_027532	606215135	7	730	UGAGGUA	724	3UTR	0.0183	1		Arfgef1	ADP-ribosylation factor guanine nucleotide-exchange factor 1(brefeldin A-inhibited) (Arfgef1)	NM_001102430	156231074
mmu-let-7i	1.1365	8.6276	6.38067	0.00117101	0.0162477	-0.871401	Tpm2	tropomyosin 2, beta (Tpm2)	NM_009416	482677660	8	1928	UGAGGUAG	1921	3UTR	0.0183	1		Arfip2	ADP-ribosylation factor interacting protein 2 (Arfip2)	NM_029802	228008330
mmu-let-7i	1.1365	8.6276	6.38067	0.00117101	0.0162477	-0.871401	2610036L11Rik	centromere protein W (Cenpw)	NM_001109747	157909785	8	1076	GAGGUAGU	1069	3UTR	0.0182	2		Arfrp1	ADP-ribosylation factor related protein 1 (Arfrp1)	NM_029702	260763869
mmu-let-7i	1.1365	8.6276	6.38067	0.00117101	0.0162477	-0.871401	Alox8	arachidonate 8-lipoxygenase (Alox8)	NM_009661	443906715	8	2949	UGAGGUAG	2942	3UTR	0.0182	1		Arhgap1	Rho GTPase activating protein 1 (Arhgap1)	NM_146124	225543419
mmu-let-7i	1.1365	8.6276	6.38067	0.00117101	0.0162477	-0.871401	Bpi	iduronidase, alpha-L- (Idua)	NM_008325	575402999	8	2338	UGAGGUAG	2331	3UTR	0.0182	1		Arhgap12	Rho GTPase activating protein 12 (Arhgap12)	NM_001039692	89242142
mmu-let-7i	1.1365	8.6276	6.38067	0.00117101	0.0162477	-0.871401	Zdhhc12	zinc finger, DHHC domain containing 12 (Zdhhc12)	NM_025428	83649754	7	1129	GAGGUAG	1123	3UTR	0.0182	2		Arhgap15	Rho GTPase activating protein 15 (Arhgap15)	NM_153820	90962990
mmu-let-7i	1.1365	8.6276	6.38067	0.00117101	0.0162477	-0.871401	Chrna6	cholinergic receptor, nicotinic, alpha polypeptide 6 (Chrna6)	NM_021369	31542394	8	2553	GAGGUAGU	2546	3UTR	0.0181	2		Arhgap19	Rho GTPase activating protein 19 (Arhgap19)	NM_027667	254750663
mmu-let-7i	1.1365	8.6276	6.38067	0.00117101	0.0162477	-0.871401	Arhgef2	rho/rac guanine nucleotide exchange factor (GEF) 2 (Arhgef2)	NM_008487	170650646	8	4238	GAGGUAGU	4231	3UTR	0.018	2		Arhgap22	Rho GTPase activating protein 22 (Arhgap22)	NM_153800	224967115
mmu-let-7i	1.1365	8.6276	6.38067	0.00117101	0.0162477	-0.871401	6330500D04Rik	family with sequence similarity 65, member B (Fam65b)	NM_178658	554790343	8	2170	UGAGGUAG	2163	3UTR	0.0178	1		Arhgap23	Rho GTPase activating protein 23 (Arhgap23)	NM_021493	114796636
mmu-let-7i	1.1365	8.6276	6.38067	0.00117101	0.0162477	-0.871401	Apbb3	amyloid beta (A4) precursor protein-binding, family B, member 3 (Apbb3)	NM_146085	22122588	7	2017	GAGGUAG	2011	3UTR	0.0178	2		Arhgap25	Rho GTPase activating protein 25 (Arhgap25)	NM_001037727	557636711
mmu-let-7i	1.1365	8.6276	6.38067	0.00117101	0.0162477	-0.871401	Gpr132	G protein-coupled receptor 132 (Gpr132)	NM_019925	141803482	8	2046	UGAGGUAG	2039	3UTR	0.0178	1		Arhgap28	Rho GTPase activating protein 28 (Arhgap28)	NM_172964	226342972
mmu-let-7i	1.1365	8.6276	6.38067	0.00117101	0.0162477	-0.871401	Hmga1	high mobility group AT-hook 1 (Hmga1)	NM_001025427	262331572	8	1297	GAGGUAGU	1290	3UTR	0.0178	2		Arhgef10	Rho guanine nucleotide exchange factor (GEF) 10 (Arhgef10)	NM_172751	557128968
mmu-let-7i	1.1365	8.6276	6.38067	0.00117101	0.0162477	-0.871401	RP23-241B2.3	major urinary protein 2 (Mup2)	NM_008647	554790318	7	782	UGAGGUA	776	3UTR	0.0178	1		Arhgef11	Rho guanine nucleotide exchange factor (GEF) 11 (Arhgef11)	NM_001003912	51491849
mmu-let-7i	1.1365	8.6276	6.38067	0.00117101	0.0162477	-0.871401	Iqcb1	IQ calmodulin-binding motif containing 1 (Iqcb1)	NM_177128	255003687	7	2114	GAGGUAG	2108	3UTR	0.0177	2		Arhgef15	Rho guanine nucleotide exchange factor (GEF) 15 (Arhgef15)	NM_177566	60279699
mmu-let-7i	1.1365	8.6276	6.38067	0.00117101	0.0162477	-0.871401	2200002K05Rik	V-set and transmembrane domain containing 5 (Vstm5)	NM_026955	142348823	8	1581	UGAGGUAG	1574	3UTR	0.0176	1		Arhgef2	rho/rac guanine nucleotide exchange factor (GEF) 2 (Arhgef2)	NM_008487	170650646
mmu-let-7i	1.1365	8.6276	6.38067	0.00117101	0.0162477	-0.871401	2200002K05Rik	V-set and transmembrane domain containing 5 (Vstm5)	NM_026955	142348823	8	858	UGAGGUAG	851	3UTR	0.0176	1		Arhgef4	Rho guanine nucleotide exchange factor (GEF) 4 (Arhgef4)	NM_183019	56699447
mmu-let-7i	1.1365	8.6276	6.38067	0.00117101	0.0162477	-0.871401	Gdap2	ganglioside-induced differentiation-associated-protein 2 (Gdap2)	NM_010269	550544218	8	2736	UGAGGUAG	2729	3UTR	0.0176	1		Arhgef7	Rho guanine nucleotide exchange factor (GEF7) (Arhgef7)	NM_017402	165377080
mmu-let-7i	1.1365	8.6276	6.38067	0.00117101	0.0162477	-0.871401	Lalba	lactalbumin, alpha (Lalba)	NM_010679	6754499	7	519	GAGGUAG	513	3UTR	0.0175	2		Arid1a	AT rich interactive domain 1A (SWI-like) (Arid1a)	NM_001080819	124249108
mmu-let-7i	1.1365	8.6276	6.38067	0.00117101	0.0162477	-0.871401	Dnase1l2	deoxyribonuclease 1-like 2 (Dnase1l2)	NM_025718	148539952	7	1151	GAGGUAG	1145	3UTR	0.0174	2		Arid3a	AT rich interactive domain 3A (BRIGHT-like) (Arid3a)	NM_007880	568599851
mmu-let-7i	1.1365	8.6276	6.38067	0.00117101	0.0162477	-0.871401	Treh	trehalase (brush-border membrane glycoprotein) (Treh)	NM_021481	482661643	7	1833	GAGGUAG	1827	3UTR	0.0174	2		Arid3c	AT rich interactive domain 3C (BRIGHT-like) (Arid3c)	NM_001017362	134244289
mmu-let-7i	1.1365	8.6276	6.38067	0.00117101	0.0162477	-0.871401	Usp21	ubiquitin specific peptidase 21 (Usp21)	NM_013919	224809306	7	1987	UGAGGUA	1981	3UTR	0.0174	1		Arl15	ADP-ribosylation factor-like 15 (Arl15)	NM_172595	156231050
mmu-let-7i	1.1365	8.6276	6.38067	0.00117101	0.0162477	-0.871401	Zc3hav1l	zinc finger CCCH-type, antiviral 1-like (Zc3hav1l)	NM_172467	289177123	8	1733	UGAGGUAG	1726	3UTR	0.0174	1		Arl2	ADP-ribosylation factor-like 2 (Arl2)	NM_019722	32129285
mmu-let-7i	1.1365	8.6276	6.38067	0.00117101	0.0162477	-0.871401	Zc3hav1l	zinc finger CCCH-type, antiviral 1-like (Zc3hav1l)	NM_172467	289177123	8	1049	UGAGGUAG	1042	3UTR	0.0174	1		Arl4d	ADP-ribosylation factor-like 4D (Arl4d)	NM_025404	156713453
mmu-let-7i	1.1365	8.6276	6.38067	0.00117101	0.0162477	-0.871401	Lrfn4	leucine rich repeat and fibronectin type III domain containing 4 (Lrfn4)	NM_153388	251823795	7	3036	UGAGGUA	3030	3UTR	0.0172	1		Arl5a	ADP-ribosylation factor-like 5A (Arl5a)	NM_182994	118130709
mmu-let-7i	1.1365	8.6276	6.38067	0.00117101	0.0162477	-0.871401	Sord	sorbitol dehydrogenase (Sord)	NM_146126	158508518	8	1706	GAGGUAGU	1699	3UTR	0.0171	2		Arl6	ADP-ribosylation factor-like 6 (Arl6)	NM_019665	188528680
mmu-let-7i	1.1365	8.6276	6.38067	0.00117101	0.0162477	-0.871401	Stk36	serine/threonine kinase 36 (Stk36)	NM_175031	67846120	8	4533	GAGGUAGU	4526	3UTR	0.0171	2		Arl6ip2	atlastin GTPase 2 (Atl2)	NM_019717	557786159
mmu-let-7i	1.1365	8.6276	6.38067	0.00117101	0.0162477	-0.871401	Syncrip	synaptotagmin binding, cytoplasmic RNA interacting protein (Syncrip)	NM_019796	547235459	9	2662	UGAGGUAGU	2654	3UTR	0.0171	1		Arl8b	ADP-ribosylation factor-like 8B (Arl8b)	NM_026011	115292448
mmu-let-7i	1.1365	8.6276	6.38067	0.00117101	0.0162477	-0.871401	Edn1	endothelin 1 (Edn1)	NM_010104	261599055	8	1608	UGAGGUAG	1601	3UTR	0.017	1		Armc10	armadillo repeat containing 10 (Armc10)	NM_026034	158508454
mmu-let-7i	1.1365	8.6276	6.38067	0.00117101	0.0162477	-0.871401	Med6	mediator complex subunit 6 (Med6)	NM_027213	27754026	7	789	UGAGGUA	783	3UTR	0.017	1		Armc5	armadillo repeat containing 5 (Armc5)	NM_146205	48928021
mmu-let-7i	1.1365	8.6276	6.38067	0.00117101	0.0162477	-0.871401	Nr6a1	nuclear receptor subfamily 6, group A, member 1 (Nr6a1)	NM_010264	227116314	9	2967	UGAGGUAGU	2959	3UTR	0.017	1		Armc6	armadillo repeat containing 6 (Armc6)	NM_133972	113199754
mmu-let-7i	1.1365	8.6276	6.38067	0.00117101	0.0162477	-0.871401	Nr6a1	nuclear receptor subfamily 6, group A, member 1 (Nr6a1)	NM_010264	227116314	9	2110	UGAGGUAGU	2102	3UTR	0.017	1		Armc7	armadillo repeat containing 7 (Armc7)	NM_177778	118130499
mmu-let-7i	1.1365	8.6276	6.38067	0.00117101	0.0162477	-0.871401	Ppme1	protein phosphatase methylesterase 1 (Ppme1)	NM_028292	118130470	8	1611	UGAGGUAG	1604	3UTR	0.017	1		Armc8	armadillo repeat containing 8 (Armc8)	NM_028768	260763996
mmu-let-7i	1.1365	8.6276	6.38067	0.00117101	0.0162477	-0.871401	Mycbp	c-myc binding protein (Mycbp)	NM_019660	141801387	8	1431	UGAGGUAG	1424	3UTR	0.0168	1		Armcx1	armadillo repeat containing, X-linked 1 (Armcx1)	NM_030066	261824003
mmu-let-7i	1.1365	8.6276	6.38067	0.00117101	0.0162477	-0.871401	Pnpo	pyridoxine 5'-phosphate oxidase (Pnpo)	NM_134021	125625355	8	1841	UGAGGUAG	1834	3UTR	0.0168	1		Armcx3	armadillo repeat containing, X-linked 3 (Armcx3)	NM_027870	261862274
mmu-let-7i	1.1365	8.6276	6.38067	0.00117101	0.0162477	-0.871401	Prpf38b	PRP38 pre-mRNA processing factor 38 (yeast) domain containing B (Prpf38b)	NM_025845	118130261	8	2520	UGAGGUAG	2513	3UTR	0.0168	1		Armet	mesencephalic astrocyte-derived neurotrophic factor (Manf)	NM_029103	142365315
mmu-let-7i	1.1365	8.6276	6.38067	0.00117101	0.0162477	-0.871401	Il1a	interleukin 1 alpha (Il1a)	NM_010554	118130060	8	1354	UGAGGUAG	1347	3UTR	0.0167	1		Arnt	aryl hydrocarbon receptor nuclear translocator (Arnt)	NM_001037737	160707993
mmu-let-7i	1.1365	8.6276	6.38067	0.00117101	0.0162477	-0.871401	Prkaa2	protein kinase, AMP-activated, alpha 2 catalytic subunit (Prkaa2)	NM_178143	227452235	8	7697	UGAGGUAG	7690	3UTR	0.0167	1		Arpm1	actin related protein T3 (Actrt3)	NM_029690	142376348
mmu-let-7i	1.1365	8.6276	6.38067	0.00117101	0.0162477	-0.871401	Sec16b	SEC16 homolog B (S. cerevisiae) (Sec16b)	NM_033354	229606098	8	4346	UGAGGUAG	4339	3UTR	0.0167	1		Arpp19	cAMP-regulated phosphoprotein 19 (Arpp19)	NM_021548	118130434
mmu-let-7i	1.1365	8.6276	6.38067	0.00117101	0.0162477	-0.871401	Abcc10	ATP-binding cassette, sub-family C (CFTR/MRP)	NM_145140	102467835	7	5280	GAGGUAG	5274	3UTR	0.0166	2		Arrb1	arrestin, beta 1 (Arrb1)	NM_177231	79750059
mmu-let-7i	1.1365	8.6276	6.38067	0.00117101	0.0162477	-0.871401	B3gnt7	UDP-GlcNAc:betaGal beta-1,3-N-acetylglucosaminyltransferase 7 (B3gnt7)	NM_145222	227496326	8	2099	GAGGUAGU	2092	3UTR	0.0166	2		Arrdc2	arrestin domain containing 2 (Arrdc2)	NM_027560	58037218
mmu-let-7i	1.1365	8.6276	6.38067	0.00117101	0.0162477	-0.871401	B3gntl1	UDP-GlcNAc:betaGal beta-1,3-N-acetylglucosaminyltransferase-like 1 (B3gntl1)	NM_178664	253970484	8	2160	UGAGGUAG	2153	3UTR	0.0166	1		Arrdc3	arrestin domain containing 3 (Arrdc3)	NM_001042591	110611936
mmu-let-7i	1.1365	8.6276	6.38067	0.00117101	0.0162477	-0.871401	Idh2	isocitrate dehydrogenase 2 (NADP+)	NM_173011	225579032	7	1617	UGAGGUA	1611	3UTR	0.0166	1		Arsb	arylsulfatase B (Arsb)	NM_009712	125656170
mmu-let-7i	1.1365	8.6276	6.38067	0.00117101	0.0162477	-0.871401	Adrb1	adrenergic receptor, beta 1 (Adrb1)	NM_007419	158517826	8	2139	UGAGGUAG	2132	3UTR	0.0165	1		Art1	ADP-ribosyltransferase 1 (Art1)	NM_009710	141803149
mmu-let-7i	1.1365	8.6276	6.38067	0.00117101	0.0162477	-0.871401	Hrh2	histamine receptor H2 (Hrh2)	NM_001010973	118131131	8	2326	GAGGUAGU	2319	3UTR	0.0165	2		Arv1	ARV1 homolog (yeast) (Arv1)	NM_026855	158508696
mmu-let-7i	1.1365	8.6276	6.38067	0.00117101	0.0162477	-0.871401	3110056O03Rik	signal peptide peptidase like 2B (Sppl2b)	NM_175195	116805337	8	2441	UGAGGUAG	2434	3UTR	0.0164	1		Arx	aristaless related homeobox (Arx)	NM_007492	31982501
mmu-let-7i	1.1365	8.6276	6.38067	0.00117101	0.0162477	-0.871401	Clcc1	chloride channel CLIC-like 1 (Clcc1)	NM_145543	295293086	8	2751	UGAGGUAG	2744	3UTR	0.0164	1		Asah3l	alkaline ceramidase 2 (Acer2)	NM_139306	594542521
mmu-let-7i	1.1365	8.6276	6.38067	0.00117101	0.0162477	-0.871401	Mup1	major urinary protein 1 (Mup1)	NM_031188	244792752	7	822	UGAGGUA	816	3UTR	0.0164	1		Asb11	ankyrin repeat and SOCS box-containing 11 (Asb11)	NM_026853	17105325
mmu-let-7i	1.1365	8.6276	6.38067	0.00117101	0.0162477	-0.871401	Rtcd1	RNA 3'-terminal phosphate cyclase (Rtca)	NM_025517	254587957	7	1245	GAGGUAG	1239	3UTR	0.0164	2		Asb12	ankyrin repeat and SOCS box-containing 12 (Asb12)	NM_080858	146149138
mmu-let-7i	1.1365	8.6276	6.38067	0.00117101	0.0162477	-0.871401	Chrm1	cholinergic receptor, muscarinic 1, CNS (Chrm1)	NM_007698	162951824	9	6050	GAGGUAGUA	6042	3UTR	0.0163	2		Asgr2	asialoglycoprotein receptor 2 (Asgr2)	NM_007493	118131075
mmu-let-7i	1.1365	8.6276	6.38067	0.00117101	0.0162477	-0.871401	Nhedc2	solute carrier family 9, subfamily B (NHA2, cation proton antiporter 2)	NM_178877	254826799	7	1874	UGAGGUA	1868	3UTR	0.0163	1		Ash1l	ash1 (absent, small, or homeotic)-like (Drosophila) (Ash1l)	NM_138679	76096373
mmu-let-7i	1.1365	8.6276	6.38067	0.00117101	0.0162477	-0.871401	Proz	protein Z, vitamin K-dependent plasma glycoprotein (Proz)	NM_025834	118130262	8	1536	GAGGUAGU	1529	3UTR	0.0163	2		Asnsd1	asparagine synthetase domain containing 1 (Asnsd1)	NM_133728	597436910
mmu-let-7i	1.1365	8.6276	6.38067	0.00117101	0.0162477	-0.871401	Mtif3	mitochondrial translational initiation factor 3 (Mtif3)	NM_029581	368711297	8	1740	UGAGGUAG	1733	3UTR	0.0162	1		Asph	aspartate-beta-hydroxylase (Asph)	NM_023066	295390500
mmu-let-7i	1.1365	8.6276	6.38067	0.00117101	0.0162477	-0.871401	P2rx1	purinergic receptor P2X, ligand-gated ion channel, 1 (P2rx1)	NM_008771	158711718	8	2308	UGAGGUAG	2301	3UTR	0.0162	1		Aste1	asteroid homolog 1 (Drosophila) (Aste1)	NM_025651	258679479
mmu-let-7i	1.1365	8.6276	6.38067	0.00117101	0.0162477	-0.871401	Pmfbp1	polyamine modulated factor 1 binding protein 1 (Pmfbp1)	NM_019938	254939576	7	3314	GAGGUAG	3308	3UTR	0.0162	2		Asxl2	additional sex combs like 2 (Drosophila) (Asxl2)	NM_172421	401782580
mmu-let-7i	1.1365	8.6276	6.38067	0.00117101	0.0162477	-0.871401	Ltb4dh	prostaglandin reductase 1 (Ptgr1)	NM_025968	141801462	8	1236	UGAGGUAG	1229	3UTR	0.0161	1		Atad3a	ATPase family, AAA domain containing 3A (Atad3a)	NM_179203	239985512
mmu-let-7i	1.1365	8.6276	6.38067	0.00117101	0.0162477	-0.871401	Ptpru	protein tyrosine phosphatase, receptor type, U (Ptpru)	NM_001083119	134031996	8	5432	UGAGGUAG	5425	3UTR	0.0161	1		Atad5	ATPase family, AAA domain containing 5 (Atad5)	NM_001029856	215422342
mmu-let-7i	1.1365	8.6276	6.38067	0.00117101	0.0162477	-0.871401	Plaa	phospholipase A2, activating protein (Plaa)	NM_172695	114431249	9	6231	UGAGGUAGU	6223	3UTR	0.0159	1		Atf5	activating transcription factor 5 (Atf5)	NM_030693	270341338
mmu-let-7i	1.1365	8.6276	6.38067	0.00117101	0.0162477	-0.871401	Rbm19	RNA binding motif protein 19 (Rbm19)	NM_028762	30794153	8	3321	UGAGGUAG	3314	3UTR	0.0159	1		Atf7ip	activating transcription factor 7 interacting protein (Atf7ip)	NM_019426	34328231
mmu-let-7i	1.1365	8.6276	6.38067	0.00117101	0.0162477	-0.871401	Rbm19	RNA binding motif protein 19 (Rbm19)	NM_028762	30794153	8	3617	GAGGUAGU	3610	3UTR	0.0159	2		Atg16l1	autophagy related 16-like 1 (S. cerevisiae) (Atg16l1)	NM_029846	329663741
mmu-let-7i	1.1365	8.6276	6.38067	0.00117101	0.0162477	-0.871401	4921505C17Rik	RPTOR independent companion of MTOR, complex 2 (Rictor)	NM_030168	168480119	9	7016	UGAGGUAGU	7008	3UTR	0.0158	1		Atg4b	autophagy related 4B, cysteine peptidase (Atg4b)	NM_174874	146198771
mmu-let-7i	1.1365	8.6276	6.38067	0.00117101	0.0162477	-0.871401	9630031F12Rik	family with sequence similarity 184, member B (Fam184b)	NM_021416	188219652	8	3690	UGAGGUAG	3683	3UTR	0.0158	1		Atg4d	autophagy related 4D, cysteine peptidase (Atg4d)	NM_153583	560879432
mmu-let-7i	1.1365	8.6276	6.38067	0.00117101	0.0162477	-0.871401	Ddx19a	DEAD (Asp-Glu-Ala-Asp) box polypeptide 19a (Ddx19a)	NM_007916	170932535	8	1662	UGAGGUAG	1655	3UTR	0.0158	1		Atic	5-aminoimidazole-4-carboxamide ribonucleotide formyltransferase/IMP cyclohydrolase (Atic)	NM_026195	227908822
mmu-let-7i	1.1365	8.6276	6.38067	0.00117101	0.0162477	-0.871401	Sept12	septin 12 (Sept12)	NM_027669	321267577	7	1063	GAGGUAG	1057	3UTR	0.0156	2		Atm	ataxia telangiectasia mutated (Atm)	NM_007499	163838659
mmu-let-7i	1.1365	8.6276	6.38067	0.00117101	0.0162477	-0.871401	AW146020	GC-rich sequence DNA binding factor 2 (Gcfc2)	NM_177884	70608162	8	2889	GAGGUAGU	2882	3UTR	0.0155	2		Atmin	ATM interactor (Atmin)	NM_177700	239049656
mmu-let-7i	1.1365	8.6276	6.38067	0.00117101	0.0162477	-0.871401	B230312A22Rik	family with sequence similarity 214, member B (Fam214b)	NM_172691	358356417	8	2828	UGAGGUAG	2821	3UTR	0.0155	1		Atox1	ATX1 (antioxidant protein 1) homolog 1 (yeast) (Atox1)	NM_009720	31981888
mmu-let-7i	1.1365	8.6276	6.38067	0.00117101	0.0162477	-0.871401	Lingo1	leucine rich repeat and Ig domain containing 1 (Lingo1)	NM_181074	55926183	8	3222	UGAGGUAG	3215	3UTR	0.0153	1		Atp10a	ATPase, class V, type 10A (Atp10a)	NM_009728	157951685
mmu-let-7i	1.1365	8.6276	6.38067	0.00117101	0.0162477	-0.871401	Ppp1r16b	protein phosphatase 1, regulatory (inhibitor) subunit 16B (Ppp1r16b)	NM_153089	227558997	8	3473	GAGGUAGU	3466	3UTR	0.0153	2		Atp12a	ATPase, H+/K+ transporting, nongastric, alpha polypeptide (Atp12a)	NM_138652	157168325
mmu-let-7i	1.1365	8.6276	6.38067	0.00117101	0.0162477	-0.871401	Zfp109	zinc finger protein 109 (Zfp109)	NM_020262	169403941	7	2629	UGAGGUA	2623	3UTR	0.0153	1		Atp13a1	ATPase type 13A1 (Atp13a1)	NM_133224	283135193
mmu-let-7i	1.1365	8.6276	6.38067	0.00117101	0.0162477	-0.871401	2410002I01Rik	ENTH domain containing 2 (Enthd2)	NM_183137	118130816	8	2315	UGAGGUAG	2308	3UTR	0.0152	1		Atp1a1	ATPase, Na+/K+ transporting, alpha 1 polypeptide (Atp1a1)	NM_144900	340007435
mmu-let-7i	1.1365	8.6276	6.38067	0.00117101	0.0162477	-0.871401	Mgat1	mannoside acetylglucosaminyltransferase 1 (Mgat1)	NM_010794	158711695	8	2575	GAGGUAGU	2568	3UTR	0.0152	2		Atp1b3	ATPase, Na+/K+ transporting, beta 3 polypeptide (Atp1b3)	NM_007502	158517964
mmu-let-7i	1.1365	8.6276	6.38067	0.00117101	0.0162477	-0.871401	Kif21b	kinesin family member 21B (Kif21b)	NM_001039472	86990453	9	7299	UGAGGUAGU	7291	3UTR	0.0149	1		Atp5o	ATP synthase, H+ transporting, mitochondrial F1 complex, O subunit (Atp5o)	NM_138597	118129975
mmu-let-7i	1.1365	8.6276	6.38067	0.00117101	0.0162477	-0.871401	Slc24a6	solute carrier family 8 (sodium/lithium/calcium exchanger)	NM_133221	170650648	8	2489	UGAGGUAG	2482	3UTR	0.0149	1		Atp6v0a1	ATPase, H+ transporting, lysosomal V0 subunit A1 (Atp6v0a1)	NM_016920	340007373
mmu-let-7i	1.1365	8.6276	6.38067	0.00117101	0.0162477	-0.871401	Rbms2	RNA binding motif, single stranded interacting protein 2 (Rbms2)	NM_019711	84872202	9	4632	UGAGGUAGU	4624	3UTR	0.0148	1		Atp6v0b	ATPase, H+ transporting, lysosomal V0 subunit B (Atp6v0b)	NM_033617	146149181
mmu-let-7i	1.1365	8.6276	6.38067	0.00117101	0.0162477	-0.871401	Acta1	actin, alpha 1, skeletal muscle (Acta1)	NM_009606	439253889	7	1350	UGAGGUA	1344	3UTR	0.0147	1		Atp6v1f	ATPase, H+ transporting, lysosomal V1 subunit F (Atp6v1f)	NM_025381	142369990
mmu-let-7i	1.1365	8.6276	6.38067	0.00117101	0.0162477	-0.871401	Galm	galactose mutarotase (Galm)	NM_176963	146198545	8	1681	UGAGGUAG	1674	3UTR	0.0147	1		Atp6v1g3	ATPase, H+ transporting, lysosomal V1 subunit G3 (Atp6v1g3)	NM_177397	118130425
mmu-let-7i	1.1365	8.6276	6.38067	0.00117101	0.0162477	-0.871401	Irx2	Iroquois related homeobox 2 (Drosophila) (Irx2)	NM_010574	47059033	8	2229	UGAGGUAG	2222	3UTR	0.0147	1		Atrn	attractin (Atrn)	NM_009730	87299634
mmu-let-7i	1.1365	8.6276	6.38067	0.00117101	0.0162477	-0.871401	Lyzl4	lysozyme-like 4 (Lyzl4)	NM_026915	31982636	7	904	UGAGGUA	898	3UTR	0.0147	1		Atxn1	ataxin 1 (Atxn1)	NM_009124	334358887
mmu-let-7i	1.1365	8.6276	6.38067	0.00117101	0.0162477	-0.871401	2610209A20Rik	lipoyl(octanoyl) transferase 2 (putative) (Lipt2)	NM_026010	229577003	8	905	UGAGGUAG	898	3UTR	0.0146	1		Atxn2l	ataxin 2-like (Atxn2l)	NM_183020	33942088
mmu-let-7i	1.1365	8.6276	6.38067	0.00117101	0.0162477	-0.871401	Ankrd49	ankyrin repeat domain 49 (Ankrd49)	NM_019683	141803047	8	1428	UGAGGUAG	1421	3UTR	0.0146	1		AU019823	expressed sequence AU019823 (AU019823)	NM_212449	201025408
mmu-let-7i	1.1365	8.6276	6.38067	0.00117101	0.0162477	-0.871401	Hspb2	heat shock protein 2 (Hspb2)	NM_024441	257796238	7	617	GAGGUAG	611	3UTR	0.0145	2		AU040829	potassium channel tetramerisation domain containing 9 (Kctd9)	NM_134073	161333812
mmu-let-7i	1.1365	8.6276	6.38067	0.00117101	0.0162477	-0.871401	Gm773	predicted gene 773 (Gm773)	NM_001033423	142344171	7	840	UGAGGUA	834	3UTR	0.0144	1		Aup1	ancient ubiquitous protein 1 (Aup1)	NM_007517	675294845
mmu-let-7i	1.1365	8.6276	6.38067	0.00117101	0.0162477	-0.871401	Lrig2	leucine-rich repeats and immunoglobulin-like domains 2 (Lrig2)	NM_001025067	68299751	9	3384	GAGGUAGUA	3376	3UTR	0.0144	2		Aurka	aurora kinase A (Aurka)	NM_011497	600971650
mmu-let-7i	1.1365	8.6276	6.38067	0.00117101	0.0162477	-0.871401	B3galt5	UDP-Gal:betaGlcNAc beta 1,3-galactosyltransferase, polypeptide 5 (B3galt5)	NM_033149	172073165	9	4136	GAGGUAGUA	4128	3UTR	0.0143	2		Aven	apoptosis, caspase activation inhibitor (Aven)	NM_028844	260099644
mmu-let-7i	1.1365	8.6276	6.38067	0.00117101	0.0162477	-0.871401	Dip2b	DIP2 disco-interacting protein 2 homolog B (Drosophila) (Dip2b)	NM_172819	226823265	7	6962	GAGGUAG	6956	3UTR	0.0143	2		AW146020	GC-rich sequence DNA binding factor 2 (Gcfc2)	NM_177884	70608162
mmu-let-7i	1.1365	8.6276	6.38067	0.00117101	0.0162477	-0.871401	Tmc8	transmembrane channel-like gene family 8 (Tmc8)	NM_181856	304434593	7	2436	GAGGUAG	2430	3UTR	0.0143	2		AW146299	karyopherin alpha 7 (importin alpha 8) (Kpna7)	NM_001013774	144446031
mmu-let-7i	1.1365	8.6276	6.38067	0.00117101	0.0162477	-0.871401	Plxnd1	plexin D1 (Plxnd1)	NM_026376	153792703	8	6348	GAGGUAGU	6341	3UTR	0.0142	2		Axl	AXL receptor tyrosine kinase (Axl)	NM_009465	300794836
mmu-let-7i	1.1365	8.6276	6.38067	0.00117101	0.0162477	-0.871401	Rbm38	RNA binding motif protein 38 (Rbm38)	NM_019547	134053932	8	1638	UGAGGUAG	1631	3UTR	0.0142	1		Azgp1	alpha-2-glycoprotein 1, zinc (Azgp1)	NM_013478	160415216
mmu-let-7i	1.1365	8.6276	6.38067	0.00117101	0.0162477	-0.871401	Dsn1	DSN1, MIND kinetochore complex component, homolog (S. cerevisiae) (Dsn1)	NM_025853	254540033	8	1177	UGAGGUAG	1170	3UTR	0.0141	1		Azi1	centrosomal protein 131 (Cep131)	NM_009734	294345408
mmu-let-7i	1.1365	8.6276	6.38067	0.00117101	0.0162477	-0.871401	Sspn	sarcospan (Sspn)	NM_010656	118130092	9	3991	UGAGGUAGU	3983	3UTR	0.0141	1		B230118H07Rik	RIKEN cDNA B230118H07 gene (B230118H07Rik)	NM_026592	142375303
mmu-let-7i	1.1365	8.6276	6.38067	0.00117101	0.0162477	-0.871401	1110005A03Rik	methyltransferase like 23 (Mettl23)	NM_028865	239049441	7	784	UGAGGUA	778	3UTR	0.014	1		B230120H23Rik	sterile alpha motif and leucine zipper containing kinase AZK (Zak)	NM_023057	258645103
mmu-let-7i	1.1365	8.6276	6.38067	0.00117101	0.0162477	-0.871401	4432412L15Rik	paralemmin 3 (Palm3)	NM_028877	124430706	7	2266	GAGGUAG	2260	3UTR	0.0139	2		B230208H17Rik	RAB, member RAS oncogene family-like 6 (Rabl6)	NM_001024616	85986572
mmu-let-7i	1.1365	8.6276	6.38067	0.00117101	0.0162477	-0.871401	A130042E20Rik	ybeY metallopeptidase (Ybey)	NM_172550	113865957	9	4508	UGAGGUAGU	4500	3UTR	0.0139	1		B230219D22Rik	RIKEN cDNA B230219D22 gene (B230219D22Rik)	NM_181278	31341429
mmu-let-7i	1.1365	8.6276	6.38067	0.00117101	0.0162477	-0.871401	Chrnb2	cholinergic receptor, nicotinic, beta polypeptide 2 (neuronal) (Chrnb2)	NM_009602	226371686	9	2794	GAGGUAGUA	2786	3UTR	0.0139	2		B230312A22Rik	family with sequence similarity 214, member B (Fam214b)	NM_172691	358356417
mmu-let-7i	1.1365	8.6276	6.38067	0.00117101	0.0162477	-0.871401	Eps15	epidermal growth factor receptor pathway substrate 15 (Eps15)	NM_007943	229577158	7	3540	UGAGGUA	3534	3UTR	0.0139	1		B3galt5	UDP-Gal:betaGlcNAc beta 1,3-galactosyltransferase, polypeptide 5 (B3galt5)	NM_033149	172073165
mmu-let-7i	1.1365	8.6276	6.38067	0.00117101	0.0162477	-0.871401	Uhrf2	ubiquitin-like, containing PHD and RING finger domains 2 (Uhrf2)	NM_144873	124430765	8	2960	GAGGUAGU	2953	3UTR	0.0139	2		B3galt6	UDP-Gal:betaGal beta 1,3-galactosyltransferase, polypeptide 6 (B3galt6)	NM_080445	148352320
mmu-let-7i	1.1365	8.6276	6.38067	0.00117101	0.0162477	-0.871401	Zbtb39	zinc finger and BTB domain containing 39 (Zbtb39)	NM_198035	37574146	9	3534	GAGGUAGUA	3526	3UTR	0.0139	2		B3galtl	disabled 2 interacting protein (Dab2ip)	NM_001001602	166295209
mmu-let-7i	1.1365	8.6276	6.38067	0.00117101	0.0162477	-0.871401	Cyp2c70	cytochrome P450, family 2, subfamily c, polypeptide 70 (Cyp2c70)	NM_145499	268607641	7	1597	GAGGUAG	1591	3UTR	0.0138	2		B3gat1	beta-1,3-glucuronyltransferase 1 (glucuronosyltransferase P) (B3gat1)	NM_029792	30794189
mmu-let-7i	1.1365	8.6276	6.38067	0.00117101	0.0162477	-0.871401	G6pc2	glucose-6-phosphatase, catalytic, 2 (G6pc2)	NM_021331	578888061	8	1982	UGAGGUAG	1975	3UTR	0.0138	1		B3gat2	beta-1,3-glucuronyltransferase 2 (glucuronosyltransferase S) (B3gat2)	NM_172124	46909608
mmu-let-7i	1.1365	8.6276	6.38067	0.00117101	0.0162477	-0.871401	Nsmce2	non-SMC element 2 homolog (MMS21, S. cerevisiae) (Nsmce2)	NM_026746	257196204	7	908	GAGGUAG	902	3UTR	0.0137	2		B3gat3	beta-1,3-glucuronyltransferase 3 (glucuronosyltransferase I) (B3gat3)	NM_024256	31980750
mmu-let-7i	1.1365	8.6276	6.38067	0.00117101	0.0162477	-0.871401	Trappc1	trafficking protein particle complex 1 (Trappc1)	NM_001024206	167830479	7	531	GAGGUAG	525	3UTR	0.0137	2		B3gnt1	UDP-GlcNAc:betaGal beta-1,3-N-acetylglucosaminyltransferase 1 (B3gnt1)	NM_175383	92110030
mmu-let-7i	1.1365	8.6276	6.38067	0.00117101	0.0162477	-0.871401	Gng5	guanine nucleotide binding protein (G protein)	NM_010318	84579905	7	455	GAGGUAG	449	3UTR	0.0136	2		B3gnt2	UDP-GlcNAc:betaGal beta-1,3-N-acetylglucosaminyltransferase 2 (B3gnt2)	NM_016888	281182756
mmu-let-7i	1.1365	8.6276	6.38067	0.00117101	0.0162477	-0.871401	Tm6sf2	transmembrane 6 superfamily member 2 (Tm6sf2)	NM_181540	658132450	7	1336	UGAGGUA	1330	3UTR	0.0136	1		B3gnt5	UDP-GlcNAc:betaGal beta-1,3-N-acetylglucosaminyltransferase 5 (B3gnt5)	NM_054052	226874879
mmu-let-7i	1.1365	8.6276	6.38067	0.00117101	0.0162477	-0.871401	Chdh	choline dehydrogenase (Chdh)	NM_172264	210031251	9	2642	UGAGGUAGU	2634	3UTR	0.0135	1		B3gnt6	UDP-GlcNAc:betaGal beta-1,3-N-acetylglucosaminyltransferase 6 (core 3 synthase) (B3gnt6)	NM_001081167	124487188
mmu-let-7i	1.1365	8.6276	6.38067	0.00117101	0.0162477	-0.871401	Ngly1	N-glycanase 1 (Ngly1)	NM_021504	142352411	8	2581	GAGGUAGU	2574	3UTR	0.0135	2		B3gnt7	UDP-GlcNAc:betaGal beta-1,3-N-acetylglucosaminyltransferase 7 (B3gnt7)	NM_145222	227496326
mmu-let-7i	1.1365	8.6276	6.38067	0.00117101	0.0162477	-0.871401	Col1a2	collagen, type I, alpha 2 (Col1a2)	NM_007743	111120328	8	4683	GAGGUAGU	4676	3UTR	0.0134	2		B3gntl1	UDP-GlcNAc:betaGal beta-1,3-N-acetylglucosaminyltransferase-like 1 (B3gntl1)	NM_178664	253970484
mmu-let-7i	1.1365	8.6276	6.38067	0.00117101	0.0162477	-0.871401	Hand1	heart and neural crest derivatives expressed transcript 1 (Hand1)	NM_008213	118130896	8	1820	UGAGGUAG	1813	3UTR	0.0134	1		B430306N03Rik	RIKEN cDNA B430306N03 gene (B430306N03Rik)	NM_177083	146198562
mmu-let-7i	1.1365	8.6276	6.38067	0.00117101	0.0162477	-0.871401	Ereg	epiregulin (Ereg)	NM_007950	119709826	9	3255	UGAGGUAGU	3247	3UTR	0.0133	1		B4galt2	UDP-Gal:betaGlcNAc beta 1,4- galactosyltransferase, polypeptide 2 (B4galt2)	NM_017377	358356394
mmu-let-7i	1.1365	8.6276	6.38067	0.00117101	0.0162477	-0.871401	Rrm2	ribonucleotide reductase M2 (Rrm2)	NM_009104	237512999	8	1403	UGAGGUAG	1396	3UTR	0.0133	1		B4galt3	UDP-Gal:betaGlcNAc beta 1,4-galactosyltransferase, polypeptide 3 (B4galt3)	NM_020579	224809361
mmu-let-7i	1.1365	8.6276	6.38067	0.00117101	0.0162477	-0.871401	Bach1	BTB and CNC homology 1 (Bach1)	NM_007520	82659113	9	4812	UGAGGUAGU	4804	3UTR	0.0132	1		Bace2	beta-site APP-cleaving enzyme 2 (Bace2)	NM_019517	244798415
mmu-let-7i	1.1365	8.6276	6.38067	0.00117101	0.0162477	-0.871401	Coil	coilin (Coil)	NM_016706	134053928	8	1896	UGAGGUAG	1889	3UTR	0.0132	1		Bach1	BTB and CNC homology 1 (Bach1)	NM_007520	82659113
mmu-let-7i	1.1365	8.6276	6.38067	0.00117101	0.0162477	-0.871401	Fis1	fission 1 (mitochondrial outer membrane) homolog (yeast) (Fis1)	NM_025562	253735729	7	676	GAGGUAG	670	3UTR	0.0132	2		Banf2	barrier to autointegration factor 2 (Banf2)	NM_207275	46402306
mmu-let-7i	1.1365	8.6276	6.38067	0.00117101	0.0162477	-0.871401	Adam25	a disintegrin and metallopeptidase domain 25 (testase 2) (Adam25)	NM_011781	157041234	7	2578	UGAGGUA	2572	3UTR	0.013	1		Basp1	brain abundant, membrane attached signal protein 1 (Basp1)	NM_027395	224586937
mmu-let-7i	1.1365	8.6276	6.38067	0.00117101	0.0162477	-0.871401	Dna2l	DNA replication helicase 2 homolog (yeast) (Dna2)	NM_177372	283837768	8	4001	UGAGGUAG	3994	3UTR	0.013	1		Bat1a	DEAD (Asp-Glu-Ala-Asp) box polypeptide 39B (Ddx39b)	NM_019693	256985179
mmu-let-7i	1.1365	8.6276	6.38067	0.00117101	0.0162477	-0.871401	Ndrg2	N-myc downstream regulated gene 2 (Ndrg2)	NM_013864	225543194	8	2061	UGAGGUAG	2054	3UTR	0.013	1		Bat2d	proline-rich coiled-coil 2C (Prrc2c)	NM_001081290	124486834
mmu-let-7i	1.1365	8.6276	6.38067	0.00117101	0.0162477	-0.871401	Oprs1	sigma non-opioid intracellular receptor 1 (Sigmar1)	NM_011014	557786222	8	1121	GAGGUAGU	1114	3UTR	0.013	2		Batf	basic leucine zipper transcription factor, ATF-like (Batf)	NM_016767	118131194
mmu-let-7i	1.1365	8.6276	6.38067	0.00117101	0.0162477	-0.871401	C630028N24Rik	hydroxylysine kinase 1 (Hykk)	NM_177351	171184417	9	4616	UGAGGUAGU	4608	3UTR	0.0129	1		Batf2	basic leucine zipper transcription factor, ATF-like 2 (Batf2)	NM_028967	28077032
mmu-let-7i	1.1365	8.6276	6.38067	0.00117101	0.0162477	-0.871401	Nostrin	nitric oxide synthase trafficker (Nostrin)	NM_181547	225007626	7	1579	GAGGUAG	1573	3UTR	0.0129	2		Bax	BCL2-associated X protein (Bax)	NM_007527	133778943
mmu-let-7i	1.1365	8.6276	6.38067	0.00117101	0.0162477	-0.871401	Grpel2	GrpE-like 2, mitochondrial (Grpel2)	NM_021296	87196330	9	3163	GAGGUAGUA	3155	3UTR	0.0127	2		BB146404	family with sequence similarity 26, member E (Fam26e)	NM_178908	125660461
mmu-let-7i	1.1365	8.6276	6.38067	0.00117101	0.0162477	-0.871401	Mettl6	methyltransferase like 6 (Mettl6)	NM_025907	118129886	8	1487	UGAGGUAG	1480	3UTR	0.0127	1		Bbc3	BCL2 binding component 3 (Bbc3)	NM_133234	254911068
mmu-let-7i	1.1365	8.6276	6.38067	0.00117101	0.0162477	-0.871401	Mettl6	methyltransferase like 6 (Mettl6)	NM_025907	118129886	8	1473	UGAGGUAG	1466	3UTR	0.0127	1		Bbox1	butyrobetaine (gamma)	NM_130452	18485501
mmu-let-7i	1.1365	8.6276	6.38067	0.00117101	0.0162477	-0.871401	Zmat4	zinc finger, matrin type 4 (Zmat4)	NM_177086	469832275	9	4124	UGAGGUAGU	4116	3UTR	0.0127	1		BC003993	CWC22 spliceosome-associated protein homolog (S. cerevisiae) (Cwc22)	NM_030560	595582352
mmu-let-7i	1.1365	8.6276	6.38067	0.00117101	0.0162477	-0.871401	Capn1	calpain 1 (Capn1)	NM_007600	160333227	8	2485	GAGGUAGU	2478	3UTR	0.0126	2		BC004004	cDNA sequence BC004004 (BC004004)	NM_030561	255522787
mmu-let-7i	1.1365	8.6276	6.38067	0.00117101	0.0162477	-0.871401	Plekhg6	pleckstrin homology domain containing, family G (with RhoGef domain) member 6 (Plekhg6)	NM_198604	165972350	7	2896	GAGGUAG	2890	3UTR	0.0126	2		BC008163	family with sequence similarity 76, member A (Fam76a)	NM_145553	255003753
mmu-let-7i	1.1365	8.6276	6.38067	0.00117101	0.0162477	-0.871401	Slc10a6	solute carrier family 10 (sodium/bile acid cotransporter family)	NM_029415	141802045	8	1815	UGAGGUAG	1808	3UTR	0.0126	1		BC021785	cDNA sequence BC021785 (BC021785)	NM_001001489	164607138
mmu-let-7i	1.1365	8.6276	6.38067	0.00117101	0.0162477	-0.871401	Klf8	Kruppel-like factor 8 (Klf8)	NM_173780	146198805	9	2690	GAGGUAGUA	2682	3UTR	0.0124	2		BC022224	dehydrogenase/reductase (SDR family) member 11 (Dhrs11)	NM_177564	262263396
mmu-let-7i	1.1365	8.6276	6.38067	0.00117101	0.0162477	-0.871401	Ehhadh	enoyl-Coenzyme A, hydratase/3-hydroxyacyl Coenzyme A dehydrogenase (Ehhadh)	NM_023737	256600255	8	2360	UGAGGUAG	2353	3UTR	0.0123	1		BC026374	carboxylesterase 4A (Ces4a)	NM_146213	238859634
mmu-let-7i	1.1365	8.6276	6.38067	0.00117101	0.0162477	-0.871401	Ccdc144b	coiled-coil domain containing 144B (Ccdc144b)	NM_178418	225543503	8	2463	GAGGUAGU	2456	3UTR	0.0122	2		BC030396	family with sequence similarity 83, member A (Fam83a)	NM_173862	169646257
mmu-let-7i	1.1365	8.6276	6.38067	0.00117101	0.0162477	-0.871401	Khk	ketohexokinase (Khk)	NM_008439	118130797	7	947	UGAGGUA	941	3UTR	0.0121	1		BC031181	cDNA sequence BC031181 (BC031181)	NM_001001181	113679825
mmu-let-7i	1.1365	8.6276	6.38067	0.00117101	0.0162477	-0.871401	Slc14a2	solute carrier family 14 (urea transporter)	NM_207651	159131879	8	3702	UGAGGUAG	3695	3UTR	0.0121	1		BC031781	SDE2 telomere maintenance homolog (S. pombe) (Sde2)	NM_145943	22122372
mmu-let-7i	1.1365	8.6276	6.38067	0.00117101	0.0162477	-0.871401	Col14a1	collagen, type XIV, alpha 1 (Col14a1)	NM_181277	226423921	8	6110	GAGGUAGU	6103	3UTR	0.012	2		BC032265	fructosamine 3 kinase related protein (Fn3krp)	NM_181420	253970462
mmu-let-7i	1.1365	8.6276	6.38067	0.00117101	0.0162477	-0.871401	Galnt1	UDP-N-acetyl-alpha-D-galactosamine:polypeptide N-acetylgalactosaminyltransferase 1 (Galnt1)	NM_013814	237874258	8	1984	UGAGGUAG	1977	3UTR	0.012	1		BC037112	family with sequence similarity 193, member A	NM_001030306	85701587
mmu-let-7i	1.1365	8.6276	6.38067	0.00117101	0.0162477	-0.871401	Ncoa3	nuclear receptor coactivator 3 (Ncoa3)	NM_008679	161086994	9	5905	GAGGUAGUA	5897	3UTR	0.0119	2		BC038822	PC-esterase domain containing 1B (Pced1b)	NM_172293	274317809
mmu-let-7i	1.1365	8.6276	6.38067	0.00117101	0.0162477	-0.871401	Trip13	thyroid hormone receptor interactor 13 (Trip13)	NM_027182	142350962	8	1546	UGAGGUAG	1539	3UTR	0.0119	1		BC043098	family with sequence similarity 168, member B (Fam168b)	NM_174997	237681112
mmu-let-7i	1.1365	8.6276	6.38067	0.00117101	0.0162477	-0.871401	9930012K11Rik	RIKEN cDNA 9930012K11 gene (9930012K11Rik)	NM_001004155	163838622	8	1940	UGAGGUAG	1933	3UTR	0.0118	1		BC046404	leucine rich repeat containing 75A (Lrrc75a)	NM_198861	38524603
mmu-let-7i	1.1365	8.6276	6.38067	0.00117101	0.0162477	-0.871401	Cpa4	carboxypeptidase A4 (Cpa4)	NM_027926	141802681	8	1566	UGAGGUAG	1559	3UTR	0.0118	1		BC048403	cDNA sequence BC048403 (BC048403)	NM_173022	41055589
mmu-let-7i	1.1365	8.6276	6.38067	0.00117101	0.0162477	-0.871401	Sall3	sal-like 3 (Drosophila) (Sall3)	NM_178280	54144639	9	5441	GAGGUAGUA	5433	3UTR	0.0118	2		BC048679	cDNA sequence BC048679 (BC048679)	NM_183143	300796823
mmu-let-7i	1.1365	8.6276	6.38067	0.00117101	0.0162477	-0.871401	Slc25a45	solute carrier family 25, member 45 (Slc25a45)	NM_134154	146149102	8	1688	UGAGGUAG	1681	3UTR	0.0118	1		BC050078	zinc finger protein 867 (Zfp867)	NM_178417	266456485
mmu-let-7i	1.1365	8.6276	6.38067	0.00117101	0.0162477	-0.871401	Tgfbr3	transforming growth factor, beta receptor III (Tgfbr3)	NM_011578	229577251	9	5663	UGAGGUAGU	5655	3UTR	0.0117	1		BC050092	zinc finger protein 599 (Zfp599)	NM_181419	161086981
mmu-let-7i	1.1365	8.6276	6.38067	0.00117101	0.0162477	-0.871401	Arhgap28	Rho GTPase activating protein 28 (Arhgap28)	NM_172964	226342972	9	4799	UGAGGUAGU	4791	3UTR	0.0115	1		BC051665	cDNA sequence BC051665 (BC051665)	NM_199148	269954685
mmu-let-7i	1.1365	8.6276	6.38067	0.00117101	0.0162477	-0.871401	Ccr7	chemokine (C-C motif) receptor 7 (Ccr7)	NM_007719	116268120	8	1388	GAGGUAGU	1381	3UTR	0.0115	2		BC052484	mesothelin-like (Mslnl)	NM_177822	133891839
mmu-let-7i	1.1365	8.6276	6.38067	0.00117101	0.0162477	-0.871401	Hmga2	high mobility group AT-hook 2 (Hmga2)	NM_010441	144922693	9	2463	GAGGUAGUA	2455	3UTR	0.0115	2		BC055107	family with sequence similarity 107, member A (Fam107a)	NM_183187	118130726
mmu-let-7i	1.1365	8.6276	6.38067	0.00117101	0.0162477	-0.871401	Kank3	KN motif and ankyrin repeat domains 3 (Kank3)	NM_030697	142344046	7	2459	GAGGUAG	2453	3UTR	0.0115	2		BC057371	ribosomal modification protein rimK-like family member A (Rimkla)	NM_177572	253795526
mmu-let-7i	1.1365	8.6276	6.38067	0.00117101	0.0162477	-0.871401	Dok3	docking protein 3 (Dok3)	NM_013739	118130854	7	1494	GAGGUAG	1488	3UTR	0.0113	2		BC057552	DDB1 and CUL4 associated factor 15 (Dcaf15)	NM_172502	142360075
mmu-let-7i	1.1365	8.6276	6.38067	0.00117101	0.0162477	-0.871401	Il13	interleukin 13 (Il13)	NM_008355	226874824	8	920	UGAGGUAG	913	3UTR	0.0113	1		BC057893	thiosulfate sulfurtransferase (rhodanese)-like domain containing 2 (Tstd2)	NM_173033	144922727
mmu-let-7i	1.1365	8.6276	6.38067	0.00117101	0.0162477	-0.871401	Il12rb2	interleukin 12 receptor, beta 2 (Il12rb2)	NM_008354	145966810	7	2785	UGAGGUA	2779	3UTR	0.0112	1		BC060632	metastasis suppressor 1-like (Mtss1l)	NM_198625	38348491
mmu-let-7i	1.1365	8.6276	6.38067	0.00117101	0.0162477	-0.871401	Cdv3	carnitine deficiency-associated gene expressed in ventricle 3 (Cdv3)	NM_175565	145301557	9	2301	UGAGGUAGU	2293	3UTR	0.0111	1		BC062109	transmembrane protein 150C (Tmem150c)	NM_182841	33469052
mmu-let-7i	1.1365	8.6276	6.38067	0.00117101	0.0162477	-0.871401	Adam33	a disintegrin and metallopeptidase domain 33 (Adam33)	NM_033615	254587923	7	2801	GAGGUAG	2795	3UTR	0.0109	2		BC064033	family with sequence similarity 180, member A (Fam180a)	NM_173375	27734065
mmu-let-7i	1.1365	8.6276	6.38067	0.00117101	0.0162477	-0.871401	Crtam	cytotoxic and regulatory T cell molecule (Crtam)	NM_019465	530339635	8	1379	GAGGUAGU	1372	3UTR	0.0109	2		BC067047	phosphatidylinositol-3,4,5-trisphosphate-dependent Rac exchange factor 1 (Prex1)	NM_177782	124517733
mmu-let-7i	1.1365	8.6276	6.38067	0.00117101	0.0162477	-0.871401	Sub1	SUB1 homolog (S. cerevisiae) (Sub1)	NM_011294	118130230	9	2860	GAGGUAGUA	2852	3UTR	0.0109	2		BC068281	cDNA sequence BC068281 (BC068281)	NM_173416	283046768
mmu-let-7i	1.1365	8.6276	6.38067	0.00117101	0.0162477	-0.871401	Adrb2	adrenergic receptor, beta 2 (Adrb2)	NM_007420	480306395	8	1784	UGAGGUAG	1777	3UTR	0.0108	1		BC089597	cDNA sequence BC089597 (BC089597)	NM_145424	226510519
mmu-let-7i	1.1365	8.6276	6.38067	0.00117101	0.0162477	-0.871401	Pldn	biogenesis of lysosomal organelles complex-1, subunit 6, pallidin (Bloc1s6)	NM_019788	110578650	9	1822	GAGGUAGUA	1814	3UTR	0.0108	2		Bcan	brevican (Bcan)	NM_007529	157951687
mmu-let-7i	1.1365	8.6276	6.38067	0.00117101	0.0162477	-0.871401	Wdr37	WD repeat domain 37 (Wdr37)	NM_001039388	550822177	9	2687	UGAGGUAGU	2679	3UTR	0.0108	1		Bcar3	breast cancer anti-estrogen resistance 3 (Bcar3)	NM_013867	239985476
mmu-let-7i	1.1365	8.6276	6.38067	0.00117101	0.0162477	-0.871401	Aven	apoptosis, caspase activation inhibitor (Aven)	NM_028844	260099644	7	1198	GAGGUAG	1192	3UTR	0.0107	2		Bcas2	breast carcinoma amplified sequence 2 (Bcas2)	NM_026602	116686103
mmu-let-7i	1.1365	8.6276	6.38067	0.00117101	0.0162477	-0.871401	Hdac10	histone deacetylase 10 (Hdac10)	NM_199198	259089443	7	2311	GAGGUAG	2305	3UTR	0.0107	2		Bcat1	branched chain aminotransferase 1, cytosolic (Bcat1)	NM_007532	209447050
mmu-let-7i	1.1365	8.6276	6.38067	0.00117101	0.0162477	-0.871401	Zfp341	zinc finger protein 341 (Zfp341)	NM_199304	40556275	8	3102	GAGGUAGU	3095	3UTR	0.0107	2		Bcat2	branched chain aminotransferase 2, mitochondrial (Bcat2)	NM_009737	340007382
mmu-let-7i	1.1365	8.6276	6.38067	0.00117101	0.0162477	-0.871401	Ifna13	interferon alpha 13 (Ifna13)	NM_177347	31340904	7	688	GAGGUAG	682	3UTR	0.0106	2		Bckdk	branched chain ketoacid dehydrogenase kinase (Bckdk)	NM_009739	88853585
mmu-let-7i	1.1365	8.6276	6.38067	0.00117101	0.0162477	-0.871401	Tmprss11f	transmembrane protease, serine 11f (Tmprss11f)	NM_178730	134053910	9	2702	GAGGUAGUA	2694	3UTR	0.0106	2		Bcl11b	B cell leukemia/lymphoma 11B (Bcl11b)	NM_001079883	120587006
mmu-let-7i	1.1365	8.6276	6.38067	0.00117101	0.0162477	-0.871401	Lin28	lin-28 homolog A (C. elegans) (Lin28a)	NM_145833	22003877	9	1621	UGAGGUAGU	1613	3UTR	0.0105	1		Bcl2	B cell leukemia/lymphoma 2 (Bcl2)	NM_009741	545477919
mmu-let-7i	1.1365	8.6276	6.38067	0.00117101	0.0162477	-0.871401	Prom2	prominin 2 (Prom2)	NM_138750	224994181	7	3737	UGAGGUA	3731	3UTR	0.0105	1		Bcl2l1	BCL2-like 1 (Bcl2l1)	NM_009743	577019437
mmu-let-7i	1.1365	8.6276	6.38067	0.00117101	0.0162477	-0.871401	Ppt2	palmitoyl-protein thioesterase 2 (Ppt2)	NM_019441	698980055	8	1208	UGAGGUAG	1201	3UTR	0.0104	1		Bcl2l14	BCL2-like 14 (apoptosis facilitator) (Bcl2l14)	NM_025778	146134973
mmu-let-7i	1.1365	8.6276	6.38067	0.00117101	0.0162477	-0.871401	Fpr1	formyl peptide receptor 1 (Fpr1)	NM_013521	71361679	7	1290	UGAGGUA	1284	3UTR	0.0103	1		Bcl2l2	BCL2-like 2 (Bcl2l2)	NM_007537	6680773
mmu-let-7i	1.1365	8.6276	6.38067	0.00117101	0.0162477	-0.871401	Mettl4	methyltransferase like 4 (Mettl4)	NM_176917	142367739	7	2008	UGAGGUA	2002	3UTR	0.0103	1		Bcl6	B cell leukemia/lymphoma 6 (Bcl6)	NM_009744	142360700
mmu-let-7i	1.1365	8.6276	6.38067	0.00117101	0.0162477	-0.871401	Tcea2	transcription elongation factor A (SII)	NM_009326	133892334	7	1140	UGAGGUA	1134	3UTR	0.0101	1		Bcl7a	B cell CLL/lymphoma 7A (Bcl7a)	NM_029850	256600253
mmu-let-7i	1.1365	8.6276	6.38067	0.00117101	0.0162477	-0.871401	Ngf	nerve growth factor (Ngf)	NM_013609	558611359	7	1084	GAGGUAG	1078	3UTR	0.01	2		Bdh1	3-hydroxybutyrate dehydrogenase, type 1 (Bdh1)	NM_175177	170014719
mmu-let-7i	1.1365	8.6276	6.38067	0.00117101	0.0162477	-0.871401	Ppapdc1b	phosphatidic acid phosphatase type 2 domain containing 1B (Ppapdc1b)	NM_028000	124487351	8	839	UGAGGUAG	832	3UTR	0.01	1		Bdnf	brain derived neurotrophic factor (Bdnf)	NM_007540	114326462
mmu-let-7i	1.1365	8.6276	6.38067	0.00117101	0.0162477	-0.871401	Acn9	ACN9 homolog (S. cerevisiae) (Acn9)	NM_001077713	124248480	7	432	UGAGGUA	426	3UTR	0.0099	1		Bgn	biglycan (Bgn)	NM_007542	159032045
mmu-let-7i	1.1365	8.6276	6.38067	0.00117101	0.0162477	-0.871401	Ethe1	ethylmalonic encephalopathy 1 (Ethe1)	NM_023154	62990178	7	1427	GAGGUAG	1421	3UTR	0.0099	2		Bhlhb2	basic helix-loop-helix family, member e40 (Bhlhe40)	NM_011498	146134431
mmu-let-7i	1.1365	8.6276	6.38067	0.00117101	0.0162477	-0.871401	Kctd17	potassium channel tetramerisation domain containing 17	NM_001081367	124486940	8	1180	UGAGGUAG	1173	3UTR	0.0099	1		Bhlhb4	basic helix-loop-helix family, member e23 (Bhlhe23)	NM_080641	227558990
mmu-let-7i	1.1365	8.6276	6.38067	0.00117101	0.0162477	-0.871401	Kif2b	kinesin family member 2B (Kif2b)	NM_028547	142376593	7	2165	GAGGUAG	2159	3UTR	0.0099	2		Bhlhb8	basic helix-loop-helix family, member a15 (Bhlha15)	NM_010800	413081683
mmu-let-7i	1.1365	8.6276	6.38067	0.00117101	0.0162477	-0.871401	Klhdc8b	kelch domain containing 8B (Klhdc8b)	NM_030075	274317582	8	2897	UGAGGUAG	2890	3UTR	0.0099	1		Bhmt	betaine-homocysteine methyltransferase (Bhmt)	NM_016668	74325340
mmu-let-7i	1.1365	8.6276	6.38067	0.00117101	0.0162477	-0.871401	Dhtkd1	dehydrogenase E1 and transketolase domain containing 1 (Dhtkd1)	NM_001081131	147906510	8	3231	GAGGUAGU	3224	3UTR	0.0098	2		Bid	BH3 interacting domain death agonist (Bid)	NM_007544	77404282
mmu-let-7i	1.1365	8.6276	6.38067	0.00117101	0.0162477	-0.871401	Smcr7l	mitochondrial elongation factor 1 (Mief1)	NM_178719	274326873	9	3202	GAGGUAGUA	3194	3UTR	0.0098	2		Bik	BCL2-interacting killer (Bik)	NM_007546	118131134
mmu-let-7i	1.1365	8.6276	6.38067	0.00117101	0.0162477	-0.871401	Tmco4	transmembrane and coiled-coil domains 4 (Tmco4)	NM_029857	229892224	8	2691	GAGGUAGU	2684	3UTR	0.0098	2		Birc1-rs1	NLR family, apoptosis inhibitory protein 6 (Naip6)	NM_010871	124107599
mmu-let-7i	1.1365	8.6276	6.38067	0.00117101	0.0162477	-0.871401	5730577I03Rik	RIKEN cDNA 5730577I03 gene	NM_175110	160333674	8	1326	UGAGGUAG	1319	3UTR	0.0097	1		Birc2	baculoviral IAP repeat-containing 2 (Birc2)	NM_007465	160333365
mmu-let-7i	1.1365	8.6276	6.38067	0.00117101	0.0162477	-0.871401	Adamts8	a disintegrin-like and metallopeptidase (reprolysin type) with thrombospondin type 1 motif, 8 (Adamts8)	NM_013906	117647242	8	3368	UGAGGUAG	3361	3UTR	0.0097	1		Birc5	baculoviral IAP repeat-containing 5 (Birc5)	NM_009689	59859886
mmu-let-7i	1.1365	8.6276	6.38067	0.00117101	0.0162477	-0.871401	B3gnt1	UDP-GlcNAc:betaGal beta-1,3-N-acetylglucosaminyltransferase 1 (B3gnt1)	NM_175383	92110030	8	1641	UGAGGUAG	1634	3UTR	0.0097	1		Blvra	biliverdin reductase A (Blvra)	NM_026678	124487330
mmu-let-7i	1.1365	8.6276	6.38067	0.00117101	0.0162477	-0.871401	Cd200r1	CD200 receptor 1 (Cd200r1)	NM_021325	158631181	8	1781	UGAGGUAG	1774	3UTR	0.0097	1		Blzf1	basic leucine zipper nuclear factor 1 (Blzf1)	NM_025505	237649003
mmu-let-7i	1.1365	8.6276	6.38067	0.00117101	0.0162477	-0.871401	Tgds	TDP-glucose 4,6-dehydratase (Tgds)	NM_029578	225579051	8	1140	UGAGGUAG	1133	3UTR	0.0097	1		Bmp15	bone morphogenetic protein 15 (Bmp15)	NM_009757	159032046
mmu-let-7i	1.1365	8.6276	6.38067	0.00117101	0.0162477	-0.871401	Zfp583	zinc finger protein 583 (Zfp583)	NM_001033249	162287407	8	2668	UGAGGUAG	2661	3UTR	0.0097	1		Bmp4	bone morphogenetic protein 4 (Bmp4)	NM_007554	121949822
mmu-let-7i	1.1365	8.6276	6.38067	0.00117101	0.0162477	-0.871401	Slc25a4	solute carrier family 25 (mitochondrial carrier, adenine nucleotide translocator)	NM_007450	148747423	7	1100	UGAGGUA	1094	3UTR	0.0096	1		Bmp5	bone morphogenetic protein 5 (Bmp5)	NM_007555	142374687
mmu-let-7i	1.1365	8.6276	6.38067	0.00117101	0.0162477	-0.871401	Tor1aip1	torsin A interacting protein 1 (Tor1aip1)	NM_144791	229608943	7	3624	UGAGGUA	3618	3UTR	0.0096	1		Bmp6	bone morphogenetic protein 6 (Bmp6)	NM_007556	118131176
mmu-let-7i	1.1365	8.6276	6.38067	0.00117101	0.0162477	-0.871401	Ccnj	cyclin J (Ccnj)	NM_172839	158533992	9	3192	UGAGGUAGU	3184	3UTR	0.0094	1		Bmp7	bone morphogenetic protein 7 (Bmp7)	NM_007557	469469053
mmu-let-7i	1.1365	8.6276	6.38067	0.00117101	0.0162477	-0.871401	Plekhg4	pleckstrin homology domain containing, family G (with RhoGef domain) member 4 (Plekhg4)	NM_001081333	124487488	8	3776	GAGGUAGU	3769	3UTR	0.0094	2		Bmpr2	bone morphogenetic protein receptor, type II (serine/threonine kinase) (Bmpr2)	NM_007561	469469045
mmu-let-7i	1.1365	8.6276	6.38067	0.00117101	0.0162477	-0.871401	Clpb	ClpB caseinolytic peptidase B (Clpb)	NM_009191	118130483	9	3005	GAGGUAGUA	2997	3UTR	0.0092	2		Bnc2	basonuclin 2 (Bnc2)	NM_172870	268830541
mmu-let-7i	1.1365	8.6276	6.38067	0.00117101	0.0162477	-0.871401	Ceacam14	carcinoembryonic antigen-related cell adhesion molecule 14 (Ceacam14)	NM_025957	146134894	7	951	GAGGUAG	945	3UTR	0.0091	2		Bnip1	BCL2/adenovirus E1B interacting protein 1 (Bnip1)	NM_172149	255003751
mmu-let-7i	1.1365	8.6276	6.38067	0.00117101	0.0162477	-0.871401	Fbxl12	F-box and leucine-rich repeat protein 12 (Fbxl12)	NM_013911	557440728	8	1733	UGAGGUAG	1726	3UTR	0.0091	1		Bnip3l	BCL2/adenovirus E1B interacting protein 3-like (Bnip3l)	NM_009761	159032047
mmu-let-7i	1.1365	8.6276	6.38067	0.00117101	0.0162477	-0.871401	Hsd3b7	hydroxy-delta-5-steroid dehydrogenase, 3 beta- and steroid delta-isomerase 7 (Hsd3b7)	NM_133943	100817044	8	1508	GAGGUAGU	1501	3UTR	0.0091	2		Bnipl	BCL2/adenovirus E1B 19kD interacting protein like (Bnipl)	NM_134253	270265897
mmu-let-7i	1.1365	8.6276	6.38067	0.00117101	0.0162477	-0.871401	Masp1	mannan-binding lectin serine peptidase 1 (Masp1)	NM_008555	148226523	8	2442	UGAGGUAG	2435	3UTR	0.0091	1		Bok	BCL2-related ovarian killer (Bok)	NM_016778	118131154
mmu-let-7i	1.1365	8.6276	6.38067	0.00117101	0.0162477	-0.871401	5830404H04Rik	C2 calcium-dependent domain containing 2 (C2cd2)	NM_174847	225543529	8	2864	UGAGGUAG	2857	3UTR	0.009	1		Bpi	iduronidase, alpha-L- (Idua)	NM_008325	575402999
mmu-let-7i	1.1365	8.6276	6.38067	0.00117101	0.0162477	-0.871401	Thrsp	thyroid hormone responsive (Thrsp)	NM_009381	31560631	8	822	UGAGGUAG	815	3UTR	0.009	1		Bpil3	BPI fold containing family B, member 6 (Bpifb6)	NM_199303	254675245
mmu-let-7i	1.1365	8.6276	6.38067	0.00117101	0.0162477	-0.871401	AI846148	expressed sequence AI846148 (AI846148)	NM_001033139	268370247	8	1581	GAGGUAGU	1574	3UTR	0.0089	2		Brca2	breast cancer 2 (Brca2)	NM_001081001	567757610
mmu-let-7i	1.1365	8.6276	6.38067	0.00117101	0.0162477	-0.871401	Aste1	asteroid homolog 1 (Drosophila) (Aste1)	NM_025651	258679479	7	2237	UGAGGUA	2231	3UTR	0.0089	1		Brcc3	BRCA1/BRCA2-containing complex, subunit 3 (Brcc3)	NM_145956	262050567
mmu-let-7i	1.1365	8.6276	6.38067	0.00117101	0.0162477	-0.871401	Ing3	inhibitor of growth family, member 3 (Ing3)	NM_023626	139948755	9	3535	UGAGGUAGU	3527	3UTR	0.0089	1		Brd3	bromodomain containing 3 (Brd3)	NM_023336	165972332
mmu-let-7i	1.1365	8.6276	6.38067	0.00117101	0.0162477	-0.871401	Slc16a14	solute carrier family 16 (monocarboxylic acid transporters)	NM_027921	41281605	8	1821	UGAGGUAG	1814	3UTR	0.0089	1		Brms1l	breast cancer metastasis-suppressor 1-like (Brms1l)	NM_001037756	141802540
mmu-let-7i	1.1365	8.6276	6.38067	0.00117101	0.0162477	-0.871401	E130306D19Rik	Rho guanine nucleotide exchange factor (GEF) 39 (Arhgef39)	NM_001013377	225543123	8	1567	GAGGUAGU	1560	3UTR	0.0088	2		Brpf3	bromodomain and PHD finger containing, 3 (Brpf3)	NM_001081315	124486782
mmu-let-7i	1.1365	8.6276	6.38067	0.00117101	0.0162477	-0.871401	Adh4	alcohol dehydrogenase 4 (class II)	NM_011996	121247378	7	1237	UGAGGUA	1231	3UTR	0.0087	1		Brs3	bombesin-like receptor 3 (Brs3)	NM_009766	142388449
mmu-let-7i	1.1365	8.6276	6.38067	0.00117101	0.0162477	-0.871401	Liph	lipase, member H (Liph)	NM_001083894	140970703	9	1943	UGAGGUAGU	1935	3UTR	0.0087	1		Brsk1	BR serine/threonine kinase 1 (Brsk1)	NM_001003920	270483780
mmu-let-7i	1.1365	8.6276	6.38067	0.00117101	0.0162477	-0.871401	5730427N09Rik	NSA2 ribosome biogenesis homolog (S. cerevisiae) (Nsa2)	NM_021552	225690527	7	1059	UGAGGUA	1053	3UTR	0.0086	1		Brsk2	BR serine/threonine kinase 2 (Brsk2)	NM_029426	118130600
mmu-let-7i	1.1365	8.6276	6.38067	0.00117101	0.0162477	-0.871401	Casp3	caspase 3 (Casp3)	NM_009810	549806823	8	1056	UGAGGUAG	1049	3UTR	0.0086	1		Brunol4	CUGBP, Elav-like family member 4 (Celf4)	NM_133195	226371656
mmu-let-7i	1.1365	8.6276	6.38067	0.00117101	0.0162477	-0.871401	Myo7a	myosin VIIA (Myo7a)	NM_008663	115511009	8	7242	GAGGUAGU	7235	3UTR	0.0086	2		Brunol6	CUGBP, Elav-like family member 6 (Celf6)	NM_175235	34328408
mmu-let-7i	1.1365	8.6276	6.38067	0.00117101	0.0162477	-0.871401	Rdx	radixin (Rdx)	NM_009041	157277947	9	3286	GAGGUAGUA	3278	3UTR	0.0086	2		Brwd2	WD repeat domain 11 (Wdr11)	NM_172255	227908799
mmu-let-7i	1.1365	8.6276	6.38067	0.00117101	0.0162477	-0.871401	4931408C20Rik	RIKEN cDNA 4931408C20 gene (4931408C20Rik)	NM_001033764	237757315	7	4215	UGAGGUA	4209	3UTR	0.0084	1		Bscl2	Berardinelli-Seip congenital lipodystrophy 2 homolog (seipin) (Bscl2)	NM_008144	595763327
mmu-let-7i	1.1365	8.6276	6.38067	0.00117101	0.0162477	-0.871401	AU019823	expressed sequence AU019823 (AU019823)	NM_212449	201025408	9	2774	GAGGUAGUA	2766	3UTR	0.0084	2		Bsg	basigin (Bsg)	NM_009768	116014344
mmu-let-7i	1.1365	8.6276	6.38067	0.00117101	0.0162477	-0.871401	F2rl3	coagulation factor II (thrombin) receptor-like 3 (F2rl3)	NM_007975	141803010	8	1726	UGAGGUAG	1719	3UTR	0.0083	1		Bsn	bassoon (Bsn)	NM_007567	124487406
mmu-let-7i	1.1365	8.6276	6.38067	0.00117101	0.0162477	-0.871401	Zfp353	zinc finger protein 353	NM_153096	120407055	9	5011	GAGGUAGUA	5003	3UTR	0.0083	2		Btbd10	BTB (POZ) domain containing 10 (Btbd10)	NM_133700	118130947
mmu-let-7i	1.1365	8.6276	6.38067	0.00117101	0.0162477	-0.871401	Mecp2	methyl CpG binding protein 2 (Mecp2)	NM_001081979	659928156	10	4864	GAGGUAGUAG	4855	3UTR	0.0082	2		Btbd11	BTB (POZ) domain containing 11 (Btbd11)	NM_028709	205360835
mmu-let-7i	1.1365	8.6276	6.38067	0.00117101	0.0162477	-0.871401	Adam8	a disintegrin and metallopeptidase domain 8 (Adam8)	NM_007403	118131182	8	2625	UGAGGUAG	2618	3UTR	0.0081	1		Btg2	B cell translocation gene 2, anti-proliferative (Btg2)	NM_007570	84875511
mmu-let-7i	1.1365	8.6276	6.38067	0.00117101	0.0162477	-0.871401	Gipc1	GIPC PDZ domain containing family, member 1 (Gipc1)	NM_018771	24475640	8	1330	UGAGGUAG	1323	3UTR	0.0081	1		Btk	Bruton agammaglobulinemia tyrosine kinase (Btk)	NM_013482	161016838
mmu-let-7i	1.1365	8.6276	6.38067	0.00117101	0.0162477	-0.871401	Hoxb1	homeobox B1 (Hoxb1)	NM_008266	226693399	8	2050	GAGGUAGU	2043	3UTR	0.0081	2		Btla	B and T lymphocyte associated (Btla)	NM_001037719	83700226
mmu-let-7i	1.1365	8.6276	6.38067	0.00117101	0.0162477	-0.871401	Cd300lb	CD300 antigen like family member B (Cd300lb)	NM_199221	80978940	9	1825	UGAGGUAGU	1817	3UTR	0.008	1		Btn1a1	butyrophilin, subfamily 1, member A1 (Btn1a1)	NM_013483	159032052
mmu-let-7i	1.1365	8.6276	6.38067	0.00117101	0.0162477	-0.871401	Crat	carnitine acetyltransferase (Crat)	NM_007760	86198337	9	3498	UGAGGUAGU	3490	3UTR	0.008	1		Btn2a2	butyrophilin, subfamily 2, member A2 (Btn2a2)	NM_175938	144953892
mmu-let-7i	1.1365	8.6276	6.38067	0.00117101	0.0162477	-0.871401	Igf2bp3	insulin-like growth factor 2 mRNA binding protein 3 (Igf2bp3)	NM_023670	225543382	9	2778	UGAGGUAGU	2770	3UTR	0.008	1		Btnl9	butyrophilin-like 9 (Btnl9)	NM_172793	142374929
mmu-let-7i	1.1365	8.6276	6.38067	0.00117101	0.0162477	-0.871401	Klhl6	kelch-like 6 (Klhl6)	NM_183390	394025739	8	1992	GAGGUAGU	1985	3UTR	0.0079	2		Bxdc1	ribosome production factor 2 homolog (S. cerevisiae) (Rpf2)	NM_001042556	110347520
mmu-let-7i	1.1365	8.6276	6.38067	0.00117101	0.0162477	-0.871401	D330012F22Rik	GDP-D-glucose phosphorylase 1 (Gdpgp1)	NM_178752	123702128	9	3209	UGAGGUAGU	3201	3UTR	0.0077	1		Bzw2	basic leucine zipper and W2 domains 2 (Bzw2)	NM_025840	255982503
mmu-let-7i	1.1365	8.6276	6.38067	0.00117101	0.0162477	-0.871401	Ndst2	N-deacetylase/N-sulfotransferase (heparan glucosaminyl) 2 (Ndst2)	NM_010811	113195687	8	3510	UGAGGUAG	3503	3UTR	0.0077	1		C030011O14Rik	family with sequence similarity 73, member A (Fam73a)	NM_174868	240849395
mmu-let-7i	1.1365	8.6276	6.38067	0.00117101	0.0162477	-0.871401	Zfp354b	zinc finger protein 354B (Zfp354b)	NM_013744	157278007	8	2435	GAGGUAGU	2428	3UTR	0.0077	2		C130026I21Rik	RIKEN cDNA C130026I21 gene (C130026I21Rik)	NM_175219	130495347
mmu-let-7i	1.1365	8.6276	6.38067	0.00117101	0.0162477	-0.871401	Gusb	glucuronidase, beta (Gusb)	NM_010368	6754097	8	1974	GAGGUAGU	1967	3UTR	0.0076	2		C130050O18Rik	RIKEN cDNA C130050O18 gene (C130050O18Rik)	NM_177000	124301224
mmu-let-7i	1.1365	8.6276	6.38067	0.00117101	0.0162477	-0.871401	Ubxd3	UBX domain protein 10 (Ubxn10)	NM_178671	552953723	9	2618	UGAGGUAGU	2610	3UTR	0.0076	1		C130074G19Rik	RIKEN cDNA C130074G19 gene (C130074G19Rik)	NM_178692	121582461
mmu-let-7i	1.1365	8.6276	6.38067	0.00117101	0.0162477	-0.871401	Dnajc1	DnaJ (Hsp40) homolog, subfamily C, member 1 (Dnajc1)	NM_007869	300192989	7	1753	UGAGGUA	1747	3UTR	0.0074	1		C1qa	complement component 1, q subcomponent, alpha polypeptide (C1qa)	NM_007572	124286804
mmu-let-7i	1.1365	8.6276	6.38067	0.00117101	0.0162477	-0.871401	Soat2	sterol O-acyltransferase 2 (Soat2)	NM_146064	22122546	8	1721	GAGGUAGU	1714	3UTR	0.0074	2		C1ql3	C1q-like 3 (C1ql3)	NM_153155	109689714
mmu-let-7i	1.1365	8.6276	6.38067	0.00117101	0.0162477	-0.871401	Il12a	interleukin 12a (Il12a)	NM_008351	226874943	8	935	UGAGGUAG	928	3UTR	0.0072	1		C1qtnf7	C1q and tumor necrosis factor related protein 7 (C1qtnf7)	NM_175425	206597456
mmu-let-7i	1.1365	8.6276	6.38067	0.00117101	0.0162477	-0.871401	Zc3h3	zinc finger CCCH type containing 3 (Zc3h3)	NM_172121	26006470	8	2898	UGAGGUAG	2891	3UTR	0.0072	1		C1qtnf9	C1q and tumor necrosis factor related protein 9 (C1qtnf9)	NM_183175	323510616
mmu-let-7i	1.1365	8.6276	6.38067	0.00117101	0.0162477	-0.871401	Rnf5	ring finger protein 5 (Rnf5)	NM_019403	118130759	8	1040	GAGGUAGU	1033	3UTR	0.0071	2		C1rl	complement component 1, r subcomponent-like (C1rl)	NM_181344	269973898
mmu-let-7i	1.1365	8.6276	6.38067	0.00117101	0.0162477	-0.871401	Bscl2	Berardinelli-Seip congenital lipodystrophy 2 homolog (seipin) (Bscl2)	NM_008144	595763327	7	1641	GAGGUAG	1635	3UTR	0.007	2		C2	complement component 2 (within H-2S) (C2)	NM_013484	157951693
mmu-let-7i	1.1365	8.6276	6.38067	0.00117101	0.0162477	-0.871401	Fas	Fas (TNF receptor superfamily member 6) (Fas)	NM_007987	226443048	8	1050	GAGGUAGU	1043	3UTR	0.0068	2		C230095G01Rik	transmembrane protein 72 (Tmem72)	NM_178768	141803540
mmu-let-7i	1.1365	8.6276	6.38067	0.00117101	0.0162477	-0.871401	Hipk3	homeodomain interacting protein kinase 3 (Hipk3)	NM_010434	224922823	7	3904	UGAGGUA	3898	3UTR	0.0068	1		C230096C10Rik	ER membrane protein complex subunit 1 (Emc1)	NM_146157	545688913
mmu-let-7i	1.1365	8.6276	6.38067	0.00117101	0.0162477	-0.871401	Osmr	oncostatin M receptor (Osmr)	NM_011019	162287201	9	3788	UGAGGUAGU	3780	3UTR	0.0068	1		C330005M16Rik	iron/zinc purple acid phospatase-like (Papl)	NM_175319	146198644
mmu-let-7i	1.1365	8.6276	6.38067	0.00117101	0.0162477	-0.871401	Sh3bgr	SH3-binding domain glutamic acid-rich protein (Sh3bgr)	NM_015825	125490366	8	1065	UGAGGUAG	1058	3UTR	0.0067	1		C330016O10Rik	NEDD4 binding protein 3 (N4bp3)	NM_145974	56119137
mmu-let-7i	1.1365	8.6276	6.38067	0.00117101	0.0162477	-0.871401	Cyp4f13	cytochrome P450, family 4, subfamily f, polypeptide 13 (Cyp4f13)	NM_130882	20373154	7	1665	GAGGUAG	1659	3UTR	0.0066	2		C430048L16Rik	RNA binding motif protein 12 B2 (Rbm12b2)	NM_198957	90186271
mmu-let-7i	1.1365	8.6276	6.38067	0.00117101	0.0162477	-0.871401	1810008A18Rik	family with sequence similarity 207, member A (Fam207a)	NM_133998	227430354	9	2167	UGAGGUAGU	2159	3UTR	0.0065	1		C4b	complement component 4B (Chido blood group) (C4b)	NM_009780	157951697
mmu-let-7i	1.1365	8.6276	6.38067	0.00117101	0.0162477	-0.871401	Gpr137b	G protein-coupled receptor 137B (Gpr137b)	NM_031999	148612871	9	2039	UGAGGUAGU	2031	3UTR	0.0065	1		C530043G21Rik	family with sequence similarity 20, member B (Fam20b)	NM_145413	141802861
mmu-let-7i	1.1365	8.6276	6.38067	0.00117101	0.0162477	-0.871401	Indol1	indoleamine 2,3-dioxygenase 2 (Ido2)	NM_145949	170763487	9	2552	UGAGGUAGU	2544	3UTR	0.0065	1		C530044N13Rik	calcineurin-like phosphoesterase domain containing 1 (Cpped1)	NM_146067	142351105
mmu-let-7i	1.1365	8.6276	6.38067	0.00117101	0.0162477	-0.871401	Chrd	chordin (Chrd)	NM_009893	160333391	8	3006	GAGGUAGU	2999	3UTR	0.0064	2		C630004H02Rik	HID1 domain containing (Hid1)	NM_175454	118129878
mmu-let-7i	1.1365	8.6276	6.38067	0.00117101	0.0162477	-0.871401	Dpp3	dipeptidylpeptidase 3 (Dpp3)	NM_133803	244791123	8	2350	UGAGGUAG	2343	3UTR	0.0064	1		C630028N24Rik	hydroxylysine kinase 1 (Hykk)	NM_177351	171184417
mmu-let-7i	1.1365	8.6276	6.38067	0.00117101	0.0162477	-0.871401	Slc12a9	solute carrier family 12 (potassium/chloride transporters)	NM_031406	281371455	8	3116	UGAGGUAG	3109	3UTR	0.0064	1		C730025P13Rik	transmembrane protein 203 (Tmem203)	NM_177344	124001544
mmu-let-7i	1.1365	8.6276	6.38067	0.00117101	0.0162477	-0.871401	Nek3	NIMA (never in mitosis gene a)-related expressed kinase 3 (Nek3)	NM_011848	251823708	8	1892	UGAGGUAG	1885	3UTR	0.0063	1		C77080	expressed sequence C77080 (C77080)	NM_001033189	146198782
mmu-let-7i	1.1365	8.6276	6.38067	0.00117101	0.0162477	-0.871401	Gpatch3	G patch domain containing 3 (Gpatch3)	NM_172876	141802392	8	1721	UGAGGUAG	1714	3UTR	0.0062	1		C920005C14Rik	family with sequence similarity 109, member B (Fam109b)	NM_177391	274327442
mmu-let-7i	1.1365	8.6276	6.38067	0.00117101	0.0162477	-0.871401	Tex21	testis expressed gene 21 (Tex21)	NM_019784	226958527	7	2047	GAGGUAG	2041	3UTR	0.0061	2		Cab39l	calcium binding protein 39-like (Cab39l)	NM_026908	142378328
mmu-let-7i	1.1365	8.6276	6.38067	0.00117101	0.0162477	-0.871401	Wipi1	WD repeat domain, phosphoinositide interacting 1 (Wipi1)	NM_145940	118130229	8	1434	UGAGGUAG	1427	3UTR	0.0061	1		Cabc1	aarF domain containing kinase 3 (Adck3)	NM_023341	254028204
mmu-let-7i	1.1365	8.6276	6.38067	0.00117101	0.0162477	-0.871401	Arid3c	AT rich interactive domain 3C (BRIGHT-like) (Arid3c)	NM_001017362	134244289	8	1524	UGAGGUAG	1517	3UTR	0.006	1		Cabin1	calcineurin binding protein 1 (Cabin1)	NM_172549	92859876
mmu-let-7i	1.1365	8.6276	6.38067	0.00117101	0.0162477	-0.871401	2010109I03Rik	RIKEN cDNA 2010109I03 gene (2010109I03Rik)	NM_025929	114842381	9	869	UGAGGUAGU	861	3UTR	0.0058	1		Cabp2	calcium binding protein 2 (Cabp2)	NM_013878	237681155
mmu-let-7i	1.1365	8.6276	6.38067	0.00117101	0.0162477	-0.871401	BC057552	DDB1 and CUL4 associated factor 15 (Dcaf15)	NM_172502	142360075	8	1968	GAGGUAGU	1961	3UTR	0.0058	2		Cabp5	calcium binding protein 5 (Cabp5)	NM_013877	141802239
mmu-let-7i	1.1365	8.6276	6.38067	0.00117101	0.0162477	-0.871401	Dmrtc2	doublesex and mab-3 related transcription factor like family C2 (Dmrtc2)	NM_027732	298286496	8	1254	UGAGGUAG	1247	3UTR	0.0058	1		Cachd1	cache domain containing 1 (Cachd1)	NM_198037	39930562
mmu-let-7i	1.1365	8.6276	6.38067	0.00117101	0.0162477	-0.871401	Dtx2	deltex 2 homolog (Drosophila) (Dtx2)	NM_023742	368711284	8	2425	UGAGGUAG	2418	3UTR	0.0057	1		Cacna1g	calcium channel, voltage-dependent, T type, alpha 1G subunit (Cacna1g)	NM_009783	295444826
mmu-let-7i	1.1365	8.6276	6.38067	0.00117101	0.0162477	-0.871401	Frmd4b	FERM domain containing 4B (Frmd4b)	NM_145148	172088096	9	4564	UGAGGUAGU	4556	3UTR	0.0057	1		Cacnb3	calcium channel, voltage-dependent, beta 3 subunit (Cacnb3)	NM_001044741	555943857
mmu-let-7i	1.1365	8.6276	6.38067	0.00117101	0.0162477	-0.871401	Cdc34	cell division cycle 34 (Cdc34)	NM_177613	31341237	8	1001	GAGGUAGU	994	3UTR	0.0056	2		Cacnb4	calcium channel, voltage-dependent, beta 4 subunit (Cacnb4)	NM_001037099	549806787
mmu-let-7i	1.1365	8.6276	6.38067	0.00117101	0.0162477	-0.871401	Tmprss2	transmembrane protease, serine 2 (Tmprss2)	NM_015775	34328225	9	2572	GAGGUAGUA	2564	3UTR	0.0056	2		Cacng2	calcium channel, voltage-dependent, gamma subunit 2 (Cacng2)	NM_007583	159032057
mmu-let-7i	1.1365	8.6276	6.38067	0.00117101	0.0162477	-0.871401	Tnfaip8l3	tumor necrosis factor, alpha-induced protein 8-like 3 (Tnfaip8l3)	NM_001033535	160333219	9	1130	UGAGGUAGU	1122	3UTR	0.0056	1		Cadm2	cell adhesion molecule 2 (Cadm2)	NM_178721	225543374
mmu-let-7i	1.1365	8.6276	6.38067	0.00117101	0.0162477	-0.871401	1110037F02Rik	RIKEN cDNA 1110037F02 gene (1110037F02Rik)	NM_001081183	124487144	9	6286	UGAGGUAGU	6278	3UTR	0.0055	1		Cadm3	cell adhesion molecule 3 (Cadm3)	NM_053199	56699416
mmu-let-7i	1.1365	8.6276	6.38067	0.00117101	0.0162477	-0.871401	Pde12	phosphodiesterase 12 (Pde12)	NM_178668	40538841	9	2564	UGAGGUAGU	2556	3UTR	0.0054	1		Calb1	calbindin 1 (Calb1)	NM_009788	145864481
mmu-let-7i	1.1365	8.6276	6.38067	0.00117101	0.0162477	-0.871401	Nrtn	neurturin (Nrtn)	NM_008738	118130662	7	945	GAGGUAG	939	3UTR	0.0053	2		Calca	calcitonin/calcitonin-related polypeptide, alpha (Calca)	NM_001033954	161086909
mmu-let-7i	1.1365	8.6276	6.38067	0.00117101	0.0162477	-0.871401	Asnsd1	asparagine synthetase domain containing 1 (Asnsd1)	NM_133728	597436910	7	2342	UGAGGUA	2336	3UTR	0.0052	1		Calcoco1	calcium binding and coiled coil domain 1 (Calcoco1)	NM_026192	298676544
mmu-let-7i	1.1365	8.6276	6.38067	0.00117101	0.0162477	-0.871401	Lrig3	leucine-rich repeats and immunoglobulin-like domains 3 (Lrig3)	NM_177152	283135156	8	3594	UGAGGUAG	3587	3UTR	0.0052	1		Cald1	caldesmon 1 (Cald1)	NM_145575	156447035
mmu-let-7i	1.1365	8.6276	6.38067	0.00117101	0.0162477	-0.871401	Slc25a18	solute carrier family 25 (mitochondrial carrier)	NM_001081048	153791934	8	1141	UGAGGUAG	1134	3UTR	0.0052	1		Calm4	calmodulin 4 (Calm4)	NM_020036	148352321
mmu-let-7i	1.1365	8.6276	6.38067	0.00117101	0.0162477	-0.871401	Hsd17b2	hydroxysteroid (17-beta) dehydrogenase 2 (Hsd17b2)	NM_008290	123173869	7	1278	GAGGUAG	1272	3UTR	0.0051	2		Caly	calcyon neuron-specific vesicular protein (Caly)	NM_026769	298676541
mmu-let-7i	1.1365	8.6276	6.38067	0.00117101	0.0162477	-0.871401	Rbm4	RNA binding motif protein 4 (Rbm4)	NM_009032	588282782	9	2206	UGAGGUAGU	2198	3UTR	0.005	1		Camk1d	calcium/calmodulin-dependent protein kinase ID (Camk1d)	NM_177343	594190795
mmu-let-7i	1.1365	8.6276	6.38067	0.00117101	0.0162477	-0.871401	1810074P20Rik	UFM1 specific ligase 1 (Ufl1)	NM_026194	227330589	8	3544	GAGGUAGU	3537	3UTR	0.0049	2		Camk1g	calcium/calmodulin-dependent protein kinase I gamma (Camk1g)	NM_144817	92110041
mmu-let-7i	1.1365	8.6276	6.38067	0.00117101	0.0162477	-0.871401	Actr5	ARP5 actin-related protein 5 (Actr5)	NM_175419	91176334	8	2218	UGAGGUAG	2211	3UTR	0.0049	1		Camk2g	calcium/calmodulin-dependent protein kinase II gamma (Camk2g)	NM_178597	546231289
mmu-let-7i	1.1365	8.6276	6.38067	0.00117101	0.0162477	-0.871401	Arv1	ARV1 homolog (yeast) (Arv1)	NM_026855	158508696	8	862	UGAGGUAG	855	3UTR	0.0049	1		Camk2n1	calcium/calmodulin-dependent protein kinase II inhibitor 1 (Camk2n1)	NM_025451	189409052
mmu-let-7i	1.1365	8.6276	6.38067	0.00117101	0.0162477	-0.871401	Gale	galactose-4-epimerase, UDP (Gale)	NM_178389	118130587	8	1312	UGAGGUAG	1305	3UTR	0.0049	1		Camta1	calmodulin binding transcription activator 1 (Camta1)	NM_001081557	307344706
mmu-let-7i	1.1365	8.6276	6.38067	0.00117101	0.0162477	-0.871401	Hcfc2	host cell factor C2 (Hcfc2)	NM_001081218	124487040	7	2385	UGAGGUA	2379	3UTR	0.0049	1		Cant1	calcium activated nucleotidase 1 (Cant1)	NM_001025617	390125182
mmu-let-7i	1.1365	8.6276	6.38067	0.00117101	0.0162477	-0.871401	Pcdh19	protocadherin 19 (Pcdh19)	NM_001105245	157426848	10	7153	UGAGGUAGUA	7144	3UTR	0.0049	1		Cap1	CAP, adenylate cyclase-associated protein 1 (yeast) (Cap1)	NM_007598	666875874
mmu-let-7i	1.1365	8.6276	6.38067	0.00117101	0.0162477	-0.871401	Zfp607	zinc finger proten 607 (Zfp607)	NM_001024726	110625612	9	3095	GAGGUAGUA	3087	3UTR	0.0048	2		Capn1	calpain 1 (Capn1)	NM_007600	160333227
mmu-let-7i	1.1365	8.6276	6.38067	0.00117101	0.0162477	-0.871401	2610036L11Rik	centromere protein W (Cenpw)	NM_001109747	157909785	9	1077	UGAGGUAGU	1069	3UTR	0.0046	1		Capn10	calpain 10 (Capn10)	NM_011796	87080822
mmu-let-7i	1.1365	8.6276	6.38067	0.00117101	0.0162477	-0.871401	Mtrf1	mitogen-activated protein kinase 8 (Mapk8)	NM_016700	225637490	8	5043	GAGGUAGU	5036	3UTR	0.0046	2		Capn6	calpain 6 (Capn6)	NM_007603	157951663
mmu-let-7i	1.1365	8.6276	6.38067	0.00117101	0.0162477	-0.871401	Apbb3	amyloid beta (A4) precursor protein-binding, family B, member 3 (Apbb3)	NM_146085	22122588	8	2018	UGAGGUAG	2011	3UTR	0.0045	1		Capn9	calpain 9 (Capn9)	NM_023709	251823796
mmu-let-7i	1.1365	8.6276	6.38067	0.00117101	0.0162477	-0.871401	Arhgef2	rho/rac guanine nucleotide exchange factor (GEF) 2 (Arhgef2)	NM_008487	170650646	9	4239	UGAGGUAGU	4231	3UTR	0.0045	1		Capns1	calpain, small subunit 1 (Capns1)	NM_009795	141802724
mmu-let-7i	1.1365	8.6276	6.38067	0.00117101	0.0162477	-0.871401	Gpaa1	GPI anchor attachment protein 1 (Gpaa1)	NM_010331	31981728	7	2002	GAGGUAG	1996	3UTR	0.0045	2		Capzb	capping protein (actin filament) muscle Z-line, beta (Capzb)	NM_009798	407027845
mmu-let-7i	1.1365	8.6276	6.38067	0.00117101	0.0162477	-0.871401	Lrdd	p53 induced death domain protein 1 (Pidd1)	NM_022654	12083586	7	2896	GAGGUAG	2890	3UTR	0.0045	2		Car1	carbonic anhydrase 1 (Car1)	NM_009799	145301621
mmu-let-7i	1.1365	8.6276	6.38067	0.00117101	0.0162477	-0.871401	Col3a1	collagen, type III, alpha 1 (Col3a1)	NM_009930	226423932	8	5014	GAGGUAGU	5007	3UTR	0.0044	2		Car14	carbonic anhydrase 14 (Car14)	NM_011797	133892566
mmu-let-7i	1.1365	8.6276	6.38067	0.00117101	0.0162477	-0.871401	Dnase1l2	deoxyribonuclease 1-like 2 (Dnase1l2)	NM_025718	148539952	8	1152	UGAGGUAG	1145	3UTR	0.0044	1		Car2	carbonic anhydrase 2 (Car2)	NM_009801	157951595
mmu-let-7i	1.1365	8.6276	6.38067	0.00117101	0.0162477	-0.871401	Iqcb1	IQ calmodulin-binding motif containing 1 (Iqcb1)	NM_177128	255003687	8	2115	UGAGGUAG	2108	3UTR	0.0044	1		Car7	carbonic anhydrase 7 (Car7)	NM_053070	156139072
mmu-let-7i	1.1365	8.6276	6.38067	0.00117101	0.0162477	-0.871401	Lalba	lactalbumin, alpha (Lalba)	NM_010679	6754499	8	520	UGAGGUAG	513	3UTR	0.0044	1		Card14	caspase recruitment domain family, member 14 (Card14)	NM_130886	118131044
mmu-let-7i	1.1365	8.6276	6.38067	0.00117101	0.0162477	-0.871401	Tspan13	tetraspanin 13 (Tspan13)	NM_025359	118130350	9	1844	GAGGUAGUA	1836	3UTR	0.0044	2		Casp2	caspase 2 (Casp2)	NM_007610	6680847
mmu-let-7i	1.1365	8.6276	6.38067	0.00117101	0.0162477	-0.871401	B3gnt7	UDP-GlcNAc:betaGal beta-1,3-N-acetylglucosaminyltransferase 7 (B3gnt7)	NM_145222	227496326	9	2100	UGAGGUAGU	2092	3UTR	0.0042	1		Casp3	caspase 3 (Casp3)	NM_009810	549806823
mmu-let-7i	1.1365	8.6276	6.38067	0.00117101	0.0162477	-0.871401	Hrh2	histamine receptor H2 (Hrh2)	NM_001010973	118131131	9	2327	UGAGGUAGU	2319	3UTR	0.0042	1		Casp6	caspase 6 (Casp6)	NM_009811	157951735
mmu-let-7i	1.1365	8.6276	6.38067	0.00117101	0.0162477	-0.871401	Lor	loricrin (Lor)	NM_008508	112293270	8	1733	GAGGUAGU	1726	3UTR	0.0041	2		Casp9	caspase 9 (Casp9)	NM_015733	485050362
mmu-let-7i	1.1365	8.6276	6.38067	0.00117101	0.0162477	-0.871401	Qars	glutaminyl-tRNA synthetase (Qars)	NM_133794	269954676	7	2361	GAGGUAG	2355	3UTR	0.0041	2		Casr	calcium-sensing receptor (Casr)	NM_013803	148762953
mmu-let-7i	1.1365	8.6276	6.38067	0.00117101	0.0162477	-0.871401	Sept12	septin 12 (Sept12)	NM_027669	321267577	8	1064	UGAGGUAG	1057	3UTR	0.0039	1		Cbfb	core binding factor beta (Cbfb)	NM_022309	238814330
mmu-let-7i	1.1365	8.6276	6.38067	0.00117101	0.0162477	-0.871401	Banf2	barrier to autointegration factor 2 (Banf2)	NM_207275	46402306	7	490	GAGGUAG	484	3UTR	0.0039	2		Cbln3	cerebellin 3 precursor protein (Cbln3)	NM_019820	118130579
mmu-let-7i	1.1365	8.6276	6.38067	0.00117101	0.0162477	-0.871401	Pbx3	pre B cell leukemia homeobox 3 (Pbx3)	NM_016768	594542477	9	2299	GAGGUAGUA	2291	3UTR	0.0037	2		Cbs	cystathionine beta-synthase (Cbs)	NM_144855	405778330
mmu-let-7i	1.1365	8.6276	6.38067	0.00117101	0.0162477	-0.871401	Dip2b	DIP2 disco-interacting protein 2 homolog B (Drosophila) (Dip2b)	NM_172819	226823265	8	6963	UGAGGUAG	6956	3UTR	0.0036	1		Cbx2	chromobox 2 (Cbx2)	NM_007623	31542345
mmu-let-7i	1.1365	8.6276	6.38067	0.00117101	0.0162477	-0.871401	Lrig2	leucine-rich repeats and immunoglobulin-like domains 2 (Lrig2)	NM_001025067	68299751	10	3385	UGAGGUAGUA	3376	3UTR	0.0036	1		Cbx6	neuronal pentraxin chromo domain (Npcd)	NM_001013362	113374170
mmu-let-7i	1.1365	8.6276	6.38067	0.00117101	0.0162477	-0.871401	Plxnd1	plexin D1 (Plxnd1)	NM_026376	153792703	9	6349	UGAGGUAGU	6341	3UTR	0.0036	1		Cc2d1a	coiled-coil and C2 domain containing 1A (Cc2d1a)	NM_145970	22122408
mmu-let-7i	1.1365	8.6276	6.38067	0.00117101	0.0162477	-0.871401	Uhrf2	ubiquitin-like, containing PHD and RING finger domains 2 (Uhrf2)	NM_144873	124430765	9	2961	UGAGGUAGU	2953	3UTR	0.0035	1		Cc2d1b	coiled-coil and C2 domain containing 1B (Cc2d1b)	NM_177045	142373435
mmu-let-7i	1.1365	8.6276	6.38067	0.00117101	0.0162477	-0.871401	Zbtb39	zinc finger and BTB domain containing 39 (Zbtb39)	NM_198035	37574146	10	3535	UGAGGUAGUA	3526	3UTR	0.0035	1		Ccbl2	cysteine conjugate-beta lyase 2 (Ccbl2)	NM_173763	649572207
mmu-let-7i	1.1365	8.6276	6.38067	0.00117101	0.0162477	-0.871401	Col1a2	collagen, type I, alpha 2 (Col1a2)	NM_007743	111120328	9	4684	UGAGGUAGU	4676	3UTR	0.0034	1		Ccbp2	atypical chemokine receptor 2 (Ackr2)	NM_021609	453040310
mmu-let-7i	1.1365	8.6276	6.38067	0.00117101	0.0162477	-0.871401	Fasl	Fas ligand (TNF superfamily, member 6) (Fasl)	NM_010177	327478403	9	1420	GAGGUAGUA	1412	3UTR	0.0034	2		Ccdc101	coiled-coil domain containing 101 (Ccdc101)	NM_029339	228008309
mmu-let-7i	1.1365	8.6276	6.38067	0.00117101	0.0162477	-0.871401	Ngly1	N-glycanase 1 (Ngly1)	NM_021504	142352411	9	2582	UGAGGUAGU	2574	3UTR	0.0034	1		Ccdc115	coiled-coil domain containing 115 (Ccdc115)	NM_027159	237649013
mmu-let-7i	1.1365	8.6276	6.38067	0.00117101	0.0162477	-0.871401	Tdrkh	tudor and KH domain containing protein (Tdrkh)	NM_028307	110625941	9	2433	GAGGUAGUA	2425	3UTR	0.0034	2		Ccdc124	coiled-coil domain containing 124 (Ccdc124)	NM_026964	133893353
mmu-let-7i	1.1365	8.6276	6.38067	0.00117101	0.0162477	-0.871401	Trappc1	trafficking protein particle complex 1 (Trappc1)	NM_001024206	167830479	8	532	UGAGGUAG	525	3UTR	0.0034	1		Ccdc127	coiled-coil domain containing 127 (Ccdc127)	NM_024201	281183254
mmu-let-7i	1.1365	8.6276	6.38067	0.00117101	0.0162477	-0.871401	Oprs1	sigma non-opioid intracellular receptor 1 (Sigmar1)	NM_011014	557786222	9	1122	UGAGGUAGU	1114	3UTR	0.0033	1		Ccdc130	coiled-coil domain containing 130 (Ccdc130)	NM_026350	659928101
mmu-let-7i	1.1365	8.6276	6.38067	0.00117101	0.0162477	-0.871401	Plekhg6	pleckstrin homology domain containing, family G (with RhoGef domain) member 6 (Plekhg6)	NM_198604	165972350	8	2897	UGAGGUAG	2890	3UTR	0.0032	1		Ccdc132	coiled-coil domain containing 132 (Ccdc132)	NM_024260	268370056
mmu-let-7i	1.1365	8.6276	6.38067	0.00117101	0.0162477	-0.871401	Abcb9	ATP-binding cassette, sub-family B (MDR/TAP)	NM_019875	66932951	9	3325	GAGGUAGUA	3317	3UTR	0.0031	2		Ccdc135	dynein regulatory complex subunit 7 (Drc7)	NM_001042715	154091012
mmu-let-7i	1.1365	8.6276	6.38067	0.00117101	0.0162477	-0.871401	Sall3	sal-like 3 (Drosophila) (Sall3)	NM_178280	54144639	10	5442	UGAGGUAGUA	5433	3UTR	0.003	1		Ccdc142	coiled-coil domain containing 142 (Ccdc142)	NM_001081266	124486906
mmu-let-7i	1.1365	8.6276	6.38067	0.00117101	0.0162477	-0.871401	Ccr7	chemokine (C-C motif) receptor 7 (Ccr7)	NM_007719	116268120	9	1389	UGAGGUAGU	1381	3UTR	0.0029	1		Ccdc144b	coiled-coil domain containing 144B (Ccdc144b)	NM_178418	225543503
mmu-let-7i	1.1365	8.6276	6.38067	0.00117101	0.0162477	-0.871401	Crtam	cytotoxic and regulatory T cell molecule (Crtam)	NM_019465	530339635	9	1380	UGAGGUAGU	1372	3UTR	0.0027	1		Ccdc15	coiled-coil domain containing 15 (Ccdc15)	NM_001081429	124487468
mmu-let-7i	1.1365	8.6276	6.38067	0.00117101	0.0162477	-0.871401	Tmprss11f	transmembrane protease, serine 11f (Tmprss11f)	NM_178730	134053910	10	2703	UGAGGUAGUA	2694	3UTR	0.0027	1		Ccdc155	coiled-coil domain containing 155 (Ccdc155)	NM_201374	237512933
mmu-let-7i	1.1365	8.6276	6.38067	0.00117101	0.0162477	-0.871401	Fnip1	folliculin interacting protein 1 (Fnip1)	NM_173753	281306834	10	4786	GAGGUAGUAG	4777	3UTR	0.0026	2		Ccdc28a	coiled-coil domain containing 28A (Ccdc28a)	NM_144820	142354973
mmu-let-7i	1.1365	8.6276	6.38067	0.00117101	0.0162477	-0.871401	Ngf	nerve growth factor (Ngf)	NM_013609	558611359	8	1085	UGAGGUAG	1078	3UTR	0.0025	1		Ccdc3	coiled-coil domain containing 3 (Ccdc3)	NM_028804	58037350
mmu-let-7i	1.1365	8.6276	6.38067	0.00117101	0.0162477	-0.871401	Zcchc3	zinc finger, CCHC domain containing 3 (Zcchc3)	NM_175126	227500549	9	1782	GAGGUAGUA	1774	3UTR	0.0024	2		Ccdc46	centrosomal protein 112 (Cep112)	NM_029606	125661051
mmu-let-7i	1.1365	8.6276	6.38067	0.00117101	0.0162477	-0.871401	Ccdc135	dynein regulatory complex subunit 7 (Drc7)	NM_001042715	154091012	8	2781	GAGGUAGU	2774	3UTR	0.0023	2		Ccdc53	coiled-coil domain containing 53 (Ccdc53)	NM_026070	171906602
mmu-let-7i	1.1365	8.6276	6.38067	0.00117101	0.0162477	-0.871401	Clpb	ClpB caseinolytic peptidase B (Clpb)	NM_009191	118130483	10	3006	UGAGGUAGUA	2997	3UTR	0.0023	1		Ccdc56	cytochrome C oxidase assembly factor 3 (Coa3)	NM_026618	142387850
mmu-let-7i	1.1365	8.6276	6.38067	0.00117101	0.0162477	-0.871401	Map3k1	mitogen-activated protein kinase kinase kinase 1 (Map3k1)	NM_011945	101944545	10	6654	GAGGUAGUAG	6645	3UTR	0.0023	2		Ccdc60	coiled-coil domain containing 60 (Ccdc60)	NM_177759	141802445
mmu-let-7i	1.1365	8.6276	6.38067	0.00117101	0.0162477	-0.871401	Limk2	LIM motif-containing protein kinase 2 (Limk2)	NM_010718	549806770	10	2234	GAGGUAGUAG	2225	3UTR	0.0022	2		Ccdc61	coiled-coil domain containing 61 (Ccdc61)	NM_001033314	146198606
mmu-let-7i	1.1365	8.6276	6.38067	0.00117101	0.0162477	-0.871401	Rdx	radixin (Rdx)	NM_009041	157277947	10	3287	UGAGGUAGUA	3278	3UTR	0.0022	1		Ccdc64	coiled-coil domain containing 64 (Ccdc64)	NM_001080808	124248513
mmu-let-7i	1.1365	8.6276	6.38067	0.00117101	0.0162477	-0.871401	Zfp294	listerin E3 ubiquitin protein ligase 1 (Ltn1)	NM_001081068	124486726	10	6997	GAGGUAGUAG	6988	3UTR	0.0022	2		Ccdc69	coiled-coil domain containing 69 (Ccdc69)	NM_177471	115270980
mmu-let-7i	1.1365	8.6276	6.38067	0.00117101	0.0162477	-0.871401	AU019823	expressed sequence AU019823 (AU019823)	NM_212449	201025408	10	2775	UGAGGUAGUA	2766	3UTR	0.0021	1		Ccdc71	coiled-coil domain containing 71 (Ccdc71)	NM_133744	164519144
mmu-let-7i	1.1365	8.6276	6.38067	0.00117101	0.0162477	-0.871401	Espl1	extra spindle pole bodies 1 (S. cerevisiae) (Espl1)	NM_001014976	237874219	8	6494	GAGGUAGU	6487	3UTR	0.0021	2		Ccdc79	coiled-coil domain containing 79 (Ccdc79)	NM_180958	283436084
mmu-let-7i	1.1365	8.6276	6.38067	0.00117101	0.0162477	-0.871401	Zfp353	zinc finger protein 353	NM_153096	120407055	10	5012	UGAGGUAGUA	5003	3UTR	0.0021	1		Ccdc85a	coiled-coil domain containing 85A (Ccdc85a)	NM_181577	594591564
mmu-let-7i	1.1365	8.6276	6.38067	0.00117101	0.0162477	-0.871401	Galp	galanin-like peptide (Galp)	NM_178028	31342456	7	628	UGAGGUA	622	3UTR	0.002	1		Ccdc92	coiled-coil domain containing 92 (Ccdc92)	NM_144819	110625892
mmu-let-7i	1.1365	8.6276	6.38067	0.00117101	0.0162477	-0.871401	Hoxb1	homeobox B1 (Hoxb1)	NM_008266	226693399	9	2051	UGAGGUAGU	2043	3UTR	0.002	1		Ccdc93	coiled-coil domain containing 93 (Ccdc93)	NM_001025156	160333438
mmu-let-7i	1.1365	8.6276	6.38067	0.00117101	0.0162477	-0.871401	Klhl6	kelch-like 6 (Klhl6)	NM_183390	394025739	9	1993	UGAGGUAGU	1985	3UTR	0.002	1		Cckar	cholecystokinin A receptor (Cckar)	NM_009827	160333259
mmu-let-7i	1.1365	8.6276	6.38067	0.00117101	0.0162477	-0.871401	Gusb	glucuronidase, beta (Gusb)	NM_010368	6754097	9	1975	UGAGGUAGU	1967	3UTR	0.0019	1		Ccl1	chemokine (C-C motif) ligand 1 (Ccl1)	NM_011329	257153404
mmu-let-7i	1.1365	8.6276	6.38067	0.00117101	0.0162477	-0.871401	Soat2	sterol O-acyltransferase 2 (Soat2)	NM_146064	22122546	9	1722	UGAGGUAGU	1714	3UTR	0.0019	1		Ccl22	chemokine (C-C motif) ligand 22 (Ccl22)	NM_009137	154240695
mmu-let-7i	1.1365	8.6276	6.38067	0.00117101	0.0162477	-0.871401	1600012H06Rik	RIKEN cDNA 1600012H06 gene (1600012H06Rik)	NM_001083880	139948865	10	1440	GAGGUAGUAG	1431	3UTR	0.0017	2		Ccl25	chemokine (C-C motif) ligand 25 (Ccl25)	NM_009138	294979223
mmu-let-7i	1.1365	8.6276	6.38067	0.00117101	0.0162477	-0.871401	Fas	Fas (TNF receptor superfamily member 6) (Fas)	NM_007987	226443048	9	1051	UGAGGUAGU	1043	3UTR	0.0017	1		Ccl7	chemokine (C-C motif) ligand 7 (Ccl7)	NM_013654	226958664
mmu-let-7i	1.1365	8.6276	6.38067	0.00117101	0.0162477	-0.871401	Gpr156	G protein-coupled receptor 156 (Gpr156)	NM_153394	40254200	10	2992	GAGGUAGUAG	2983	3UTR	0.0016	2		Ccna2	cyclin A2 (Ccna2)	NM_009828	161353443
mmu-let-7i	1.1365	8.6276	6.38067	0.00117101	0.0162477	-0.871401	Cdc34	cell division cycle 34 (Cdc34)	NM_177613	31341237	9	1002	UGAGGUAGU	994	3UTR	0.0014	1		Ccnb2	cyclin B2 (Ccnb2)	NM_007630	86198317
mmu-let-7i	1.1365	8.6276	6.38067	0.00117101	0.0162477	-0.871401	Tmprss2	transmembrane protease, serine 2 (Tmprss2)	NM_015775	34328225	10	2573	UGAGGUAGUA	2564	3UTR	0.0014	1		Ccne2	cyclin E2 (Ccne2)	NM_001037134	545479161
mmu-let-7i	1.1365	8.6276	6.38067	0.00117101	0.0162477	-0.871401	Hsd17b2	hydroxysteroid (17-beta) dehydrogenase 2 (Hsd17b2)	NM_008290	123173869	8	1279	UGAGGUAG	1272	3UTR	0.0013	1		Ccnf	cyclin F (Ccnf)	NM_007634	148540011
mmu-let-7i	1.1365	8.6276	6.38067	0.00117101	0.0162477	-0.871401	Nrtn	neurturin (Nrtn)	NM_008738	118130662	8	946	UGAGGUAG	939	3UTR	0.0013	1		Ccnh	cyclin H (Ccnh)	NM_023243	158508525
mmu-let-7i	1.1365	8.6276	6.38067	0.00117101	0.0162477	-0.871401	BC038822	PC-esterase domain containing 1B (Pced1b)	NM_172293	274317809	9	2135	GAGGUAGUA	2127	3UTR	0.0011	2		Ccnj	cyclin J (Ccnj)	NM_172839	158533992
mmu-let-7i	1.1365	8.6276	6.38067	0.00117101	0.0162477	-0.871401	Col3a1	collagen, type III, alpha 1 (Col3a1)	NM_009930	226423932	9	5015	UGAGGUAGU	5007	3UTR	0.0011	1		Ccnl2	cyclin L2 (Ccnl2)	NM_207678	46592876
mmu-let-7i	1.1365	8.6276	6.38067	0.00117101	0.0162477	-0.871401	Lrdd	p53 induced death domain protein 1 (Pidd1)	NM_022654	12083586	8	2897	UGAGGUAG	2890	3UTR	0.0011	1		Ccny	cyclin Y (Ccny)	NM_026484	142385651
mmu-let-7i	1.1365	8.6276	6.38067	0.00117101	0.0162477	-0.871401	Mtrf1	mitogen-activated protein kinase 8 (Mapk8)	NM_016700	225637490	9	5044	UGAGGUAGU	5036	3UTR	0.0011	1		Ccr3	chemokine (C-C motif) receptor 3 (Ccr3)	NM_009914	157012008
mmu-let-7i	1.1365	8.6276	6.38067	0.00117101	0.0162477	-0.871401	Banf2	barrier to autointegration factor 2 (Banf2)	NM_207275	46402306	8	491	UGAGGUAG	484	3UTR	0.001	1		Ccr7	chemokine (C-C motif) receptor 7 (Ccr7)	NM_007719	116268120
mmu-let-7i	1.1365	8.6276	6.38067	0.00117101	0.0162477	-0.871401	Qars	glutaminyl-tRNA synthetase (Qars)	NM_133794	269954676	8	2362	UGAGGUAG	2355	3UTR	0.001	1		Ccrk	cyclin-dependent kinase 20 (Cdk20)	NM_053180	26892296
mmu-let-7i	1.1365	8.6276	6.38067	0.00117101	0.0162477	-0.871401	Dot1l	DOT1-like, histone H3 methyltransferase (S. cerevisiae) (Dot1l)	NM_199322	40556380	10	4876	GAGGUAGUAG	4867	3UTR	0.0008	2		Cd151	CD151 antigen (Cd151)	NM_009842	161353451
mmu-let-7i	1.1365	8.6276	6.38067	0.00117101	0.0162477	-0.871401	Fasl	Fas ligand (TNF superfamily, member 6) (Fasl)	NM_010177	327478403	10	1421	UGAGGUAGUA	1412	3UTR	0.0008	1		Cd160	CD160 antigen (Cd160)	NM_018767	254553377
mmu-let-7i	1.1365	8.6276	6.38067	0.00117101	0.0162477	-0.871401	Prps1	phosphoribosyl pyrophosphate synthetase 1 (Prps1)	NM_021463	261823981	10	1823	GAGGUAGUAG	1814	3UTR	0.0008	2		Cd200r1	CD200 receptor 1 (Cd200r1)	NM_021325	158631181
mmu-let-7i	1.1365	8.6276	6.38067	0.00117101	0.0162477	-0.871401	Clec14a	C-type lectin domain family 14, member a (Clec14a)	NM_025809	237512936	11	4159	GAGGUAGUAGU	4149	3UTR	0.0007	2		Cd24a	CD24a antigen (Cd24a)	NM_009846	83816954
mmu-let-7i	1.1365	8.6276	6.38067	0.00117101	0.0162477	-0.871401	Hmga2	high mobility group AT-hook 2 (Hmga2)	NM_010441	144922693	11	3759	GAGGUAGUAGU	3749	3UTR	0.0007	2		Cd274	CD274 antigen (Cd274)	NM_021893	270341382
mmu-let-7i	1.1365	8.6276	6.38067	0.00117101	0.0162477	-0.871401	Alox5	arachidonate 5-lipoxygenase (Alox5)	NM_009662	116686109	10	2723	GAGGUAGUAG	2714	3UTR	0.0006	2		Cd300lb	CD300 antigen like family member B (Cd300lb)	NM_199221	80978940
mmu-let-7i	1.1365	8.6276	6.38067	0.00117101	0.0162477	-0.871401	Fnip1	folliculin interacting protein 1 (Fnip1)	NM_173753	281306834	11	4787	UGAGGUAGUAG	4777	3UTR	0.0006	1		Cd300lf	CD300 antigen like family member F (Cd300lf)	NM_145634	281332122
mmu-let-7i	1.1365	8.6276	6.38067	0.00117101	0.0162477	-0.871401	Map3k1	mitogen-activated protein kinase kinase kinase 1 (Map3k1)	NM_011945	101944545	11	6655	UGAGGUAGUAG	6645	3UTR	0.0006	1		Cd300lg	CD300 antigen like family member G (Cd300lg)	NM_027987	238231410
mmu-let-7i	1.1365	8.6276	6.38067	0.00117101	0.0162477	-0.871401	Gpr156	G protein-coupled receptor 156 (Gpr156)	NM_153394	40254200	11	2993	UGAGGUAGUAG	2983	3UTR	0.0004	1		Cd33	CD33 antigen (Cd33)	NM_021293	161484600
mmu-let-7i	1.1365	8.6276	6.38067	0.00117101	0.0162477	-0.871401	Myocd	myocardin (Myocd)	NM_146386	154240725	11	3949	GAGGUAGUAGU	3939	3UTR	0.0004	2		Cd36	CD36 antigen (Cd36)	NM_007643	227116342
mmu-let-7i	1.1365	8.6276	6.38067	0.00117101	0.0162477	-0.871401	Ezh2	enhancer of zeste homolog 2 (Drosophila) (Ezh2)	NM_007971	226442802	10	2398	GAGGUAGUAG	2389	3UTR	0.0003	2		Cd3d	CD3 antigen, delta polypeptide (Cd3d)	NM_013487	227498960
mmu-let-7i	1.1365	8.6276	6.38067	0.00117101	0.0162477	-0.871401	Nme4	NME/NM23 nucleoside diphosphate kinase 4 (Nme4)	NM_019731	9790122	10	629	GAGGUAGUAG	620	3UTR	0.0003	2		Cd3e	CD3 antigen, epsilon polypeptide (Cd3e)	NM_007648	158508719
mmu-let-7i	1.1365	8.6276	6.38067	0.00117101	0.0162477	-0.871401	Adrb3	adrenergic receptor, beta 3 (Adrb3)	NM_013462	133891719	11	2341	GAGGUAGUAGU	2331	3UTR	0.0002	2		Cd47	CD47 antigen (Rh-related antigen, integrin-associated signal transducer) (Cd47)	NM_010581	31982429
mmu-let-7i	1.1365	8.6276	6.38067	0.00117101	0.0162477	-0.871401	Dot1l	DOT1-like, histone H3 methyltransferase (S. cerevisiae) (Dot1l)	NM_199322	40556380	11	4877	UGAGGUAGUAG	4867	3UTR	0.0002	1		Cd5	CD5 antigen (Cd5)	NM_007650	126517488
mmu-let-7i	1.1365	8.6276	6.38067	0.00117101	0.0162477	-0.871401	Tor1aip1	torsin A interacting protein 1 (Tor1aip1)	NM_144791	229608943	10	3421	GAGGUAGUAG	3412	3UTR	0.0002	2		Cd53	CD53 antigen (Cd53)	NM_007651	161484612
mmu-let-7i	1.1365	8.6276	6.38067	0.00117101	0.0162477	-0.871401	Adrb3	adrenergic receptor, beta 3 (Adrb3)	NM_013462	133891719	12	2342	UGAGGUAGUAGU	2331	3UTR	0	1		Cd6	CD6 antigen (Cd6)	NM_009852	126513129
mmu-miR-188-5p	2.70078	3.61642	4.6368	0.00501019	0.0427793	-2.53334	Cntnap4	contactin associated protein-like 4 (Cntnap4)	NM_130457	31982590	7	4192	CAUCCCU	4186	3UTR	0.0499	1		Cd72	CD72 antigen (Cd72)	NM_007654	160333096
mmu-miR-188-5p	2.70078	3.61642	4.6368	0.00501019	0.0427793	-2.53334	Foxo6	forkhead box O6 (Foxo6)	NM_194060	34610226	7	1917	CAUCCCU	1911	3UTR	0.0499	1		Cd74	CD74 antigen (invariant polypeptide of major histocompatibility complex, class II antigen-associated) (Cd74)	NM_001042605	110624769
mmu-miR-188-5p	2.70078	3.61642	4.6368	0.00501019	0.0427793	-2.53334	Nat12	N(alpha)-acetyltransferase 30, NatC catalytic subunit (Naa30)	NM_001081430	124487476	8	2076	CAUCCCUU	2069	3UTR	0.0497	1		Cd79a	CD79A antigen (immunoglobulin-associated alpha) (Cd79a)	NM_007655	142386539
mmu-miR-188-5p	2.70078	3.61642	4.6368	0.00501019	0.0427793	-2.53334	Capn1	calpain 1 (Capn1)	NM_007600	160333227	7	3019	CAUCCCU	3013	3UTR	0.0496	1		Cd83	CD83 antigen (Cd83)	NM_009856	583966106
mmu-miR-188-5p	2.70078	3.61642	4.6368	0.00501019	0.0427793	-2.53334	Adamts18	a disintegrin-like and metallopeptidase (reprolysin type) with thrombospondin type 1 motif, 18 (Adamts18)	NM_172466	121583652	7	4467	CAUCCCU	4461	3UTR	0.0495	1		Cd84	CD84 antigen (Cd84)	NM_013489	323423083
mmu-miR-188-5p	2.70078	3.61642	4.6368	0.00501019	0.0427793	-2.53334	Chd5	chromodomain helicase DNA binding protein 5 (Chd5)	NM_001081376	124487024	8	9476	CAUCCCUU	9469	3UTR	0.0495	1		Cd97	CD97 antigen (Cd97)	NM_011925	251823834
mmu-miR-188-5p	2.70078	3.61642	4.6368	0.00501019	0.0427793	-2.53334	Sdha	succinate dehydrogenase complex, subunit A, flavoprotein (Fp) (Sdha)	NM_023281	54607097	7	2183	AUCCCUU	2177	3UTR	0.0495	2		Cdadc1	cytidine and dCMP deaminase domain containing 1 (Cdadc1)	NM_027986	270483866
mmu-miR-188-5p	2.70078	3.61642	4.6368	0.00501019	0.0427793	-2.53334	Dhodh	dihydroorotate dehydrogenase (Dhodh)	NM_020046	85677502	7	1995	CAUCCCU	1989	3UTR	0.0493	1		Cdan1	congenital dyserythropoietic anemia, type I (human) (Cdan1)	NM_026891	124430552
mmu-miR-188-5p	2.70078	3.61642	4.6368	0.00501019	0.0427793	-2.53334	Epha4	Eph receptor A4 (Epha4)	NM_007936	86788142	8	5459	CAUCCCUU	5452	3UTR	0.0493	1		Cdc2a	cyclin-dependent kinase 1 (Cdk1)	NM_007659	141803421
mmu-miR-188-5p	2.70078	3.61642	4.6368	0.00501019	0.0427793	-2.53334	Hic1	hypermethylated in cancer 1 (Hic1)	NM_010430	148226884	7	3974	CAUCCCU	3968	3UTR	0.0493	1		Cdc2l6	cyclin-dependent kinase 19 (Cdk19)	NM_198164	269973874
mmu-miR-188-5p	2.70078	3.61642	4.6368	0.00501019	0.0427793	-2.53334	Lhfpl2	lipoma HMGIC fusion partner-like 2 (Lhfpl2)	NM_172589	141803108	8	4054	CAUCCCUU	4047	3UTR	0.0492	1		Cdc34	cell division cycle 34 (Cdc34)	NM_177613	31341237
mmu-miR-188-5p	2.70078	3.61642	4.6368	0.00501019	0.0427793	-2.53334	OTTMUSG00000014964	protein (peptidyl-prolyl cis/trans isomerase) NIMA-interacting 1 (Pin1)	NM_023371	145301623	8	2434	AUCCCUUG	2427	3UTR	0.0491	2		Cdc37	cell division cycle 37 (Cdc37)	NM_016742	146134380
mmu-miR-188-5p	2.70078	3.61642	4.6368	0.00501019	0.0427793	-2.53334	Ahcyl2	S-adenosylhomocysteine hydrolase-like 2 (Ahcyl2)	NM_021414	342307098	8	2989	CAUCCCUU	2982	3UTR	0.049	1		Cdc42ep2	CDC42 effector protein (Rho GTPase binding) 2 (Cdc42ep2)	NM_026772	325197226
mmu-miR-188-5p	2.70078	3.61642	4.6368	0.00501019	0.0427793	-2.53334	Mrgprg	MAS-related GPR, member G (Mrgprg)	NM_203492	71896630	7	1163	AUCCCUU	1157	3UTR	0.0488	2		Cdc42ep4	CDC42 effector protein (Rho GTPase binding) 4 (Cdc42ep4)	NM_020006	254039692
mmu-miR-188-5p	2.70078	3.61642	4.6368	0.00501019	0.0427793	-2.53334	Slc2a9	solute carrier family 2 (facilitated glucose transporter)	NM_145559	156231024	8	3126	AUCCCUUG	3119	3UTR	0.0488	2		Cdc45l	cell division cycle 45 (Cdc45)	NM_009862	239052073
mmu-miR-188-5p	2.70078	3.61642	4.6368	0.00501019	0.0427793	-2.53334	Pla2g2c	phospholipase A2, group IIC (Pla2g2c)	NM_008868	225543510	7	1002	CAUCCCU	996	3UTR	0.0485	1		Cdc6	cell division cycle 6 (Cdc6)	NM_011799	71061472
mmu-miR-188-5p	2.70078	3.61642	4.6368	0.00501019	0.0427793	-2.53334	2010107G12Rik	RIKEN cDNA 2010107G12 gene (2010107G12Rik)	NM_001025573	282721099	7	1936	CAUCCCU	1930	3UTR	0.0484	1		Cdca3	cell division cycle associated 3 (Cdca3)	NM_013538	229577259
mmu-miR-188-5p	2.70078	3.61642	4.6368	0.00501019	0.0427793	-2.53334	Akt3	thymoma viral proto-oncogene 3 (Akt3)	NM_011785	190883483	8	2742	AUCCCUUG	2735	3UTR	0.0484	2		Cdca8	cell division cycle associated 8 (Cdca8)	NM_026560	227116267
mmu-miR-188-5p	2.70078	3.61642	4.6368	0.00501019	0.0427793	-2.53334	Aqp3	aquaporin 3 (Aqp3)	NM_016689	121949812	7	1480	AUCCCUU	1474	3UTR	0.0482	2		Cdcp2	CUB domain containing protein 2 (Cdcp2)	NM_172873	141802087
mmu-miR-188-5p	2.70078	3.61642	4.6368	0.00501019	0.0427793	-2.53334	Rbpjl	recombination signal binding protein for immunoglobulin kappa J region-like (Rbpjl)	NM_009036	6677688	7	2239	CAUCCCU	2233	3UTR	0.0479	1		Cdh12	cadherin 12 (Cdh12)	NM_001008420	160333309
mmu-miR-188-5p	2.70078	3.61642	4.6368	0.00501019	0.0427793	-2.53334	Nf1	neurofibromatosis 1 (Nf1)	NM_010897	118130208	8	9851	AUCCCUUG	9844	3UTR	0.0478	2		Cdh20	cadherin 20 (Cdh20)	NM_011800	146134464
mmu-miR-188-5p	2.70078	3.61642	4.6368	0.00501019	0.0427793	-2.53334	Elovl1	elongation of very long chain fatty acids (FEN1/Elo2, SUR4/Elo3, yeast)-like 1 (Elovl1)	NM_001039176	545479160	7	1181	CAUCCCU	1175	3UTR	0.0475	1		Cdh22	cadherin 22 (Cdh22)	NM_174988	164698423
mmu-miR-188-5p	2.70078	3.61642	4.6368	0.00501019	0.0427793	-2.53334	Elovl1	elongation of very long chain fatty acids (FEN1/Elo2, SUR4/Elo3, yeast)-like 1 (Elovl1)	NM_001039176	545479160	7	1553	AUCCCUU	1547	3UTR	0.0475	2		Cdh26	cadherin-like 26 (Cdh26)	NM_198656	601983751
mmu-miR-188-5p	2.70078	3.61642	4.6368	0.00501019	0.0427793	-2.53334	Esrra	estrogen related receptor, alpha (Esrra)	NM_007953	112293261	7	1808	AUCCCUU	1802	3UTR	0.0474	2		Cdh7	cadherin 7, type 2 (Cdh7)	NM_172853	118129933
mmu-miR-188-5p	2.70078	3.61642	4.6368	0.00501019	0.0427793	-2.53334	Lif	leukemia inhibitory factor (Lif)	NM_008501	88014750	8	3509	CAUCCCUU	3502	3UTR	0.0474	1		Cdipt	CDP-diacylglycerol--inositol 3-phosphatidyltransferase (phosphatidylinositol synthase) (Cdipt)	NM_026638	391224480
mmu-miR-188-5p	2.70078	3.61642	4.6368	0.00501019	0.0427793	-2.53334	Rab5c	RAB5C, member RAS oncogene family (Rab5c)	NM_024456	148747259	7	1479	CAUCCCU	1473	3UTR	0.0474	1		Cdk10	cyclin-dependent kinase 10 (Cdk10)	NM_194446	237858587
mmu-miR-188-5p	2.70078	3.61642	4.6368	0.00501019	0.0427793	-2.53334	Dlgap1	discs, large (Drosophila) homolog-associated protein 1 (Dlgap1)	NM_177639	189491676	8	4807	CAUCCCUU	4800	3UTR	0.0473	1		Cdk2ap2	CDK2-associated protein 2 (Cdk2ap2)	NM_026373	158508599
mmu-miR-188-5p	2.70078	3.61642	4.6368	0.00501019	0.0427793	-2.53334	Triap1	TP53 regulated inhibitor of apoptosis 1 (Triap1)	NM_026933	142344163	7	624	CAUCCCU	618	3UTR	0.0473	1		Cdk6	cyclin-dependent kinase 6 (Cdk6)	NM_009873	133892426
mmu-miR-188-5p	2.70078	3.61642	4.6368	0.00501019	0.0427793	-2.53334	Triap1	TP53 regulated inhibitor of apoptosis 1 (Triap1)	NM_026933	142344163	7	638	AUCCCUU	632	3UTR	0.0473	2		Cdk9	cyclin-dependent kinase 9 (CDC2-related kinase) (Cdk9)	NM_130860	161016772
mmu-miR-188-5p	2.70078	3.61642	4.6368	0.00501019	0.0427793	-2.53334	Tspan11	tetraspanin 11 (Tspan11)	NM_026743	133893231	8	1254	AUCCCUUG	1247	3UTR	0.0473	2		Cdkal1	CDK5 regulatory subunit associated protein 1-like 1 (Cdkal1)	NM_144536	118130026
mmu-miR-188-5p	2.70078	3.61642	4.6368	0.00501019	0.0427793	-2.53334	Tmed1	transmembrane emp24 domain containing 1 (Tmed1)	NM_010744	141802999	7	1340	CAUCCCU	1334	3UTR	0.0472	1		Cdkn2d	cyclin-dependent kinase inhibitor 2D (p19, inhibits CDK4) (Cdkn2d)	NM_009878	154350216
mmu-miR-188-5p	2.70078	3.61642	4.6368	0.00501019	0.0427793	-2.53334	B230208H17Rik	RAB, member RAS oncogene family-like 6 (Rabl6)	NM_001024616	85986572	7	2720	CAUCCCU	2714	3UTR	0.0471	1		Cdo1	cysteine dioxygenase 1, cytosolic (Cdo1)	NM_033037	118130772
mmu-miR-188-5p	2.70078	3.61642	4.6368	0.00501019	0.0427793	-2.53334	Fyco1	FYVE and coiled-coil domain containing 1 (Fyco1)	NM_148925	485050406	8	7845	CAUCCCUU	7838	3UTR	0.0471	1		Cdr2l	cerebellar degeneration-related protein 2-like (Cdr2l)	NM_001080929	124286867
mmu-miR-188-5p	2.70078	3.61642	4.6368	0.00501019	0.0427793	-2.53334	Manea	mannosidase, endo-alpha (Manea)	NM_172865	46048328	8	4215	AUCCCUUG	4208	3UTR	0.0471	2		Cds2	CDP-diacylglycerol synthase (phosphatidate cytidylyltransferase) 2 (Cds2)	NM_138651	597517958
mmu-miR-188-5p	2.70078	3.61642	4.6368	0.00501019	0.0427793	-2.53334	Prdm6	PR domain containing 6 (Prdm6)	NM_001033281	146198827	7	2020	CAUCCCU	2014	3UTR	0.047	1		Cdv3	carnitine deficiency-associated gene expressed in ventricle 3 (Cdv3)	NM_175565	145301557
mmu-miR-188-5p	2.70078	3.61642	4.6368	0.00501019	0.0427793	-2.53334	Efnb2	ephrin B2 (Efnb2)	NM_010111	158508443	8	2566	AUCCCUUG	2559	3UTR	0.0469	2		Ceacam14	carcinoembryonic antigen-related cell adhesion molecule 14 (Ceacam14)	NM_025957	146134894
mmu-miR-188-5p	2.70078	3.61642	4.6368	0.00501019	0.0427793	-2.53334	Pkp4	plakophilin 4 (Pkp4)	NM_026361	148233272	7	3965	AUCCCUU	3959	3UTR	0.0468	2		Ceacam9	carcinoembryonic antigen-related cell adhesion molecule 9 (Ceacam9)	NM_011927	158508511
mmu-miR-188-5p	2.70078	3.61642	4.6368	0.00501019	0.0427793	-2.53334	Sema6a	sema domain, transmembrane domain (TM)	NM_018744	67846118	8	6848	AUCCCUUG	6841	3UTR	0.0467	2		Cecr5	cat eye syndrome chromosome region, candidate 5 (Cecr5)	NM_144815	51093868
mmu-miR-188-5p	2.70078	3.61642	4.6368	0.00501019	0.0427793	-2.53334	9930012K11Rik	RIKEN cDNA 9930012K11 gene (9930012K11Rik)	NM_001004155	163838622	7	1783	CAUCCCU	1777	3UTR	0.0466	1		Celsr1	cadherin, EGF LAG seven-pass G-type receptor 1 (flamingo homolog, Drosophila) (Celsr1)	NM_009886	115648152
mmu-miR-188-5p	2.70078	3.61642	4.6368	0.00501019	0.0427793	-2.53334	Nrip3	nuclear receptor interacting protein 3 (Nrip3)	NM_020610	10181147	8	3636	CAUCCCUU	3629	3UTR	0.0465	1		Cenpf	centromere protein F (Cenpf)	NM_001081363	189458890
mmu-miR-188-5p	2.70078	3.61642	4.6368	0.00501019	0.0427793	-2.53334	Unc45b	unc-45 homolog B (C. elegans) (Unc45b)	NM_178680	264681527	7	2849	CAUCCCU	2843	3UTR	0.0465	1		Cenpn	centromere protein N (Cenpn)	NM_028131	146141174
mmu-miR-188-5p	2.70078	3.61642	4.6368	0.00501019	0.0427793	-2.53334	Ap4e1	adaptor-related protein complex AP-4, epsilon 1 (Ap4e1)	NM_175550	124487334	8	5130	CAUCCCUU	5123	3UTR	0.0464	1		Cenpo	centromere protein O (Cenpo)	NM_134046	146149085
mmu-miR-188-5p	2.70078	3.61642	4.6368	0.00501019	0.0427793	-2.53334	BC064033	family with sequence similarity 180, member A (Fam180a)	NM_173375	27734065	7	1113	AUCCCUU	1107	3UTR	0.0464	2		Centb5	ArfGAP with coiled-coil, ankyrin repeat and PH domains 3 (Acap3)	NM_207223	46402196
mmu-miR-188-5p	2.70078	3.61642	4.6368	0.00501019	0.0427793	-2.53334	Gulo	gulonolactone (L-) oxidase (Gulo)	NM_178747	133892400	7	1853	AUCCCUU	1847	3UTR	0.0464	2		Centd2	ArfGAP with RhoGAP domain, ankyrin repeat and PH domain 1 (Arap1)	NM_001040111	92091594
mmu-miR-188-5p	2.70078	3.61642	4.6368	0.00501019	0.0427793	-2.53334	Zfp78	zinc finger protein 78 (Zfp78)	NM_001025163	68448538	8	1781	CAUCCCUU	1774	3UTR	0.0464	1		Ces6	carboxylesterase 2A (Ces2a)	NM_133960	298358782
mmu-miR-188-5p	2.70078	3.61642	4.6368	0.00501019	0.0427793	-2.53334	Klf6	Kruppel-like factor 6 (Klf6)	NM_011803	84794648	8	1545	AUCCCUUG	1538	3UTR	0.0463	2		Cetn3	centrin 3 (Cetn3)	NM_007684	133891820
mmu-miR-188-5p	2.70078	3.61642	4.6368	0.00501019	0.0427793	-2.53334	Trak2	trafficking protein, kinesin binding 2 (Trak2)	NM_172406	237649021	8	3281	CAUCCCUU	3274	3UTR	0.0462	1		Cfb	complement factor B (Cfb)	NM_008198	218156288
mmu-miR-188-5p	2.70078	3.61642	4.6368	0.00501019	0.0427793	-2.53334	Add2	adducin 2 (beta) (Add2)	NM_013458	427918093	7	2436	CAUCCCU	2430	3UTR	0.0461	1		Cfhr1	complement factor H-related 1 (Cfhr1)	NM_015780	229335602
mmu-miR-188-5p	2.70078	3.61642	4.6368	0.00501019	0.0427793	-2.53334	Mthfsd	methenyltetrahydrofolate synthetase domain containing (Mthfsd)	NM_172761	262050631	7	1401	CAUCCCU	1395	3UTR	0.0461	1		Cga	glycoprotein hormones, alpha subunit (Cga)	NM_009889	118129833
mmu-miR-188-5p	2.70078	3.61642	4.6368	0.00501019	0.0427793	-2.53334	Tex261	testis expressed gene 261 (Tex261)	NM_009357	215598780	7	1251	CAUCCCU	1245	3UTR	0.0461	1		Cggbp1	CGG triplet repeat binding protein 1 (Cggbp1)	NM_178647	31340918
mmu-miR-188-5p	2.70078	3.61642	4.6368	0.00501019	0.0427793	-2.53334	Ttc25	tetratricopeptide repeat domain 25 (Ttc25)	NM_028918	124358956	7	2080	AUCCCUU	2074	3UTR	0.0461	2		Chac1	ChaC, cation transport regulator 1 (Chac1)	NM_026929	213972582
mmu-miR-188-5p	2.70078	3.61642	4.6368	0.00501019	0.0427793	-2.53334	Zfp687	zinc finger protein 687 (Zfp687)	NM_030074	142373364	7	4157	CAUCCCU	4151	3UTR	0.0461	1		Chaf1a	chromatin assembly factor 1, subunit A (p150) (Chaf1a)	NM_013733	142376418
mmu-miR-188-5p	2.70078	3.61642	4.6368	0.00501019	0.0427793	-2.53334	Hira	histone cell cycle regulation defective homolog A (S. cerevisiae) (Hira)	NM_010435	52426777	7	4184	CAUCCCU	4178	3UTR	0.046	1		Chchd3	coiled-coil-helix-coiled-coil-helix domain containing 3 (Chchd3)	NM_025336	21313617
mmu-miR-188-5p	2.70078	3.61642	4.6368	0.00501019	0.0427793	-2.53334	Mefv	Mediterranean fever (Mefv)	NM_019453	241666416	7	2879	AUCCCUU	2873	3UTR	0.046	2		Chchd8	cytochrome c oxidase assembly factor 4 (Coa4)	NM_183270	109948296
mmu-miR-188-5p	2.70078	3.61642	4.6368	0.00501019	0.0427793	-2.53334	Paqr8	progestin and adipoQ receptor family member VIII (Paqr8)	NM_028829	40254345	8	3523	CAUCCCUU	3516	3UTR	0.046	1		Chd4	chromodomain helicase DNA binding protein 4 (Chd4)	NM_145979	118130239
mmu-miR-188-5p	2.70078	3.61642	4.6368	0.00501019	0.0427793	-2.53334	Tgfbr3	transforming growth factor, beta receptor III (Tgfbr3)	NM_011578	229577251	8	3370	CAUCCCUU	3363	3UTR	0.046	1		Chd5	chromodomain helicase DNA binding protein 5 (Chd5)	NM_001081376	124487024
mmu-miR-188-5p	2.70078	3.61642	4.6368	0.00501019	0.0427793	-2.53334	Cacna1g	calcium channel, voltage-dependent, T type, alpha 1G subunit (Cacna1g)	NM_009783	295444826	7	7462	CAUCCCU	7456	3UTR	0.0459	1		Chdh	choline dehydrogenase (Chdh)	NM_172264	210031251
mmu-miR-188-5p	2.70078	3.61642	4.6368	0.00501019	0.0427793	-2.53334	Ccrk	cyclin-dependent kinase 20 (Cdk20)	NM_053180	26892296	7	1698	CAUCCCU	1692	3UTR	0.0459	1		Chid1	chitinase domain containing 1 (Chid1)	NM_026522	218083702
mmu-miR-188-5p	2.70078	3.61642	4.6368	0.00501019	0.0427793	-2.53334	Hnrph1	heterogeneous nuclear ribonucleoprotein H1 (Hnrnph1)	NM_021510	125628660	7	1554	CAUCCCU	1548	3UTR	0.0458	1		Chl1	cell adhesion molecule with homology to L1CAM (Chl1)	NM_007697	110347544
mmu-miR-188-5p	2.70078	3.61642	4.6368	0.00501019	0.0427793	-2.53334	Tmem206	transmembrane protein 206 (Tmem206)	NM_025864	141802089	8	1746	CAUCCCUU	1739	3UTR	0.0458	1		Chmp1a	charged multivesicular body protein 1A (Chmp1a)	NM_145606	226874928
mmu-miR-188-5p	2.70078	3.61642	4.6368	0.00501019	0.0427793	-2.53334	Abcd1	ATP-binding cassette, sub-family D (ALD)	NM_007435	6671496	7	2915	CAUCCCU	2909	3UTR	0.0457	1		Chmp7	charged multivesicular body protein 7 (Chmp7)	NM_134078	225579036
mmu-miR-188-5p	2.70078	3.61642	4.6368	0.00501019	0.0427793	-2.53334	Gjc2	gap junction protein, gamma 2 (Gjc2)	NM_175452	254028245	7	1685	CAUCCCU	1679	3UTR	0.0457	1		Chn2	chimerin 2 (Chn2)	NM_023543	254692937
mmu-miR-188-5p	2.70078	3.61642	4.6368	0.00501019	0.0427793	-2.53334	Cd300lf	CD300 antigen like family member F (Cd300lf)	NM_145634	281332122	7	1644	CAUCCCU	1638	3UTR	0.0456	1		Chpf	chondroitin polymerizing factor (Chpf)	NM_001001566	256818768
mmu-miR-188-5p	2.70078	3.61642	4.6368	0.00501019	0.0427793	-2.53334	Cd300lf	CD300 antigen like family member F (Cd300lf)	NM_145634	281332122	7	1307	CAUCCCU	1301	3UTR	0.0456	1		Chrd	chordin (Chrd)	NM_009893	160333391
mmu-miR-188-5p	2.70078	3.61642	4.6368	0.00501019	0.0427793	-2.53334	Col9a3	collagen, type IX, alpha 3 (Col9a3)	NM_009936	112363118	7	2344	CAUCCCU	2338	3UTR	0.0456	1		Chrm1	cholinergic receptor, muscarinic 1, CNS (Chrm1)	NM_007698	162951824
mmu-miR-188-5p	2.70078	3.61642	4.6368	0.00501019	0.0427793	-2.53334	Col9a3	collagen, type IX, alpha 3 (Col9a3)	NM_009936	112363118	7	2313	CAUCCCU	2307	3UTR	0.0456	1		Chrna1	cholinergic receptor, nicotinic, alpha polypeptide 1 (muscle) (Chrna1)	NM_007389	425905338
mmu-miR-188-5p	2.70078	3.61642	4.6368	0.00501019	0.0427793	-2.53334	Col9a3	collagen, type IX, alpha 3 (Col9a3)	NM_009936	112363118	7	2156	CAUCCCU	2150	3UTR	0.0456	1		Chrna2	cholinergic receptor, nicotinic, alpha polypeptide 2 (neuronal) (Chrna2)	NM_144803	133892762
mmu-miR-188-5p	2.70078	3.61642	4.6368	0.00501019	0.0427793	-2.53334	Nfkbib	nuclear factor of kappa light polypeptide gene enhancer in B cells inhibitor, beta (Nfkbib)	NM_010908	118130180	7	1260	CAUCCCU	1254	3UTR	0.0455	1		Chrna6	cholinergic receptor, nicotinic, alpha polypeptide 6 (Chrna6)	NM_021369	31542394
mmu-miR-188-5p	2.70078	3.61642	4.6368	0.00501019	0.0427793	-2.53334	Rnft1	ring finger protein, transmembrane 1 (Rnft1)	NM_029788	158508699	8	2883	AUCCCUUG	2876	3UTR	0.0455	2		Chrna7	cholinergic receptor, nicotinic, alpha polypeptide 7 (Chrna7)	NM_007390	156766081
mmu-miR-188-5p	2.70078	3.61642	4.6368	0.00501019	0.0427793	-2.53334	AC102176.8-201	NHP2 non-histone chromosome protein 2-like 1 (S. cerevisiae) (Nhp2l1)	NM_011482	144922681	7	1025	AUCCCUU	1019	3UTR	0.0454	2		Chrna9	cholinergic receptor, nicotinic, alpha polypeptide 9 (Chrna9)	NM_001081104	124487390
mmu-miR-188-5p	2.70078	3.61642	4.6368	0.00501019	0.0427793	-2.53334	Ccr7	chemokine (C-C motif) receptor 7 (Ccr7)	NM_007719	116268120	7	1505	CAUCCCU	1499	3UTR	0.0453	1		Chrnb2	cholinergic receptor, nicotinic, beta polypeptide 2 (neuronal) (Chrnb2)	NM_009602	226371686
mmu-miR-188-5p	2.70078	3.61642	4.6368	0.00501019	0.0427793	-2.53334	Ilf2	interleukin enhancer binding factor 2 (Ilf2)	NM_026374	118129818	7	1826	AUCCCUU	1820	3UTR	0.0453	2		Chrnb3	cholinergic receptor, nicotinic, beta polypeptide 3 (Chrnb3)	NM_173212	228008371
mmu-miR-188-5p	2.70078	3.61642	4.6368	0.00501019	0.0427793	-2.53334	Rnpepl1	arginyl aminopeptidase (aminopeptidase B)-like 1 (Rnpepl1)	NM_181405	318065084	7	1955	CAUCCCU	1949	3UTR	0.0453	1		Chrnb4	cholinergic receptor, nicotinic, beta polypeptide 4 (Chrnb4)	NM_148944	146149322
mmu-miR-188-5p	2.70078	3.61642	4.6368	0.00501019	0.0427793	-2.53334	Efna1	ephrin A1 (Efna1)	NM_010107	247269689	7	904	CAUCCCU	898	3UTR	0.0451	1		Chst10	carbohydrate sulfotransferase 10 (Chst10)	NM_145142	70908367
mmu-miR-188-5p	2.70078	3.61642	4.6368	0.00501019	0.0427793	-2.53334	1110067D22Rik	lectin, galactoside binding-like (Lgalsl)	NM_173752	158534081	8	2955	AUCCCUUG	2948	3UTR	0.045	2		Chst14	carbohydrate (N-acetylgalactosamine 4-0) sulfotransferase 14 (Chst14)	NM_028117	254540083
mmu-miR-188-5p	2.70078	3.61642	4.6368	0.00501019	0.0427793	-2.53334	AA409316	family with sequence similarity 83, member H (Fam83h)	NM_134087	269914117	7	4325	CAUCCCU	4319	3UTR	0.045	1		Chst5	carbohydrate (N-acetylglucosamine 6-O) sulfotransferase 5 (Chst5)	NM_019950	110815848
mmu-miR-188-5p	2.70078	3.61642	4.6368	0.00501019	0.0427793	-2.53334	Shroom2	shroom family member 2 (Shroom2)	NM_172441	595582143	8	5978	AUCCCUUG	5971	3UTR	0.045	2		Chst7	carbohydrate (N-acetylglucosamino) sulfotransferase 7 (Chst7)	NM_021715	11096335
mmu-miR-188-5p	2.70078	3.61642	4.6368	0.00501019	0.0427793	-2.53334	Enpp4	ectonucleotide pyrophosphatase/phosphodiesterase 4 (Enpp4)	NM_199016	84872230	8	3678	CAUCCCUU	3671	3UTR	0.0448	1		Chst8	carbohydrate (N-acetylgalactosamine 4-0) sulfotransferase 8 (Chst8)	NM_175140	255522961
mmu-miR-188-5p	2.70078	3.61642	4.6368	0.00501019	0.0427793	-2.53334	Lat2	linker for activation of T cells family, member 2 (Lat2)	NM_020044	550544176	7	877	CAUCCCU	871	3UTR	0.0447	1		Chtf18	CTF18, chromosome transmission fidelity factor 18 (Chtf18)	NM_145409	157951665
mmu-miR-188-5p	2.70078	3.61642	4.6368	0.00501019	0.0427793	-2.53334	Zfp629	zinc finger protein 629 (Zfp629)	NM_177226	118130365	8	5083	CAUCCCUU	5076	3UTR	0.0447	1		Ciao1	cytosolic iron-sulfur protein assembly 1 (Ciao1)	NM_025296	213385285
mmu-miR-188-5p	2.70078	3.61642	4.6368	0.00501019	0.0427793	-2.53334	Rsrc2	arginine/serine-rich coiled-coil 2 (Rsrc2)	NM_001005525	459352766	7	2137	AUCCCUU	2131	3UTR	0.0446	2		Cib2	calcium and integrin binding family member 2 (Cib2)	NM_019686	148747105
mmu-miR-188-5p	2.70078	3.61642	4.6368	0.00501019	0.0427793	-2.53334	Tmem159	transmembrane protein 159 (Tmem159)	NM_145586	21704177	7	1021	CAUCCCU	1015	3UTR	0.0446	1		Cidea	cell death-inducing DNA fragmentation factor, alpha subunit-like effector A (Cidea)	NM_007702	162287226
mmu-miR-188-5p	2.70078	3.61642	4.6368	0.00501019	0.0427793	-2.53334	1700020C11Rik	mitochondrial fission process 1 (Mtfp1)	NM_026443	142362099	7	1007	CAUCCCU	1001	3UTR	0.0445	1		Cideb	cell death-inducing DNA fragmentation factor, alpha subunit-like effector B (Cideb)	NM_009894	162138889
mmu-miR-188-5p	2.70078	3.61642	4.6368	0.00501019	0.0427793	-2.53334	Pex11b	peroxisomal biogenesis factor 11 beta (Pex11b)	NM_011069	241666480	7	964	CAUCCCU	958	3UTR	0.0444	1		Cisd2	CDGSH iron sulfur domain 2 (Cisd2)	NM_025902	212549745
mmu-miR-188-5p	2.70078	3.61642	4.6368	0.00501019	0.0427793	-2.53334	Dexi	dexamethasone-induced transcript (Dexi)	NM_021428	109809749	7	764	CAUCCCU	758	3UTR	0.0443	1		Cklf	chemokine-like factor (Cklf)	NM_001037841	556503826
mmu-miR-188-5p	2.70078	3.61642	4.6368	0.00501019	0.0427793	-2.53334	Samd4	sterile alpha motif domain containing 4 (Samd4)	NM_001037221	254939669	7	3044	CAUCCCU	3038	3UTR	0.0443	1		Clcc1	chloride channel CLIC-like 1 (Clcc1)	NM_145543	295293086
mmu-miR-188-5p	2.70078	3.61642	4.6368	0.00501019	0.0427793	-2.53334	Gpc5	glypican 5 (Gpc5)	NM_175500	270132912	7	2699	CAUCCCU	2693	3UTR	0.0442	1		Clcn3	chloride channel 3 (Clcn3)	NM_173876	189458824
mmu-miR-188-5p	2.70078	3.61642	4.6368	0.00501019	0.0427793	-2.53334	Numbl	numb-like (Numbl)	NM_010950	87042276	7	2556	CAUCCCU	2550	3UTR	0.0442	1		Clcn6	chloride channel 6 (Clcn6)	NM_011929	118129991
mmu-miR-188-5p	2.70078	3.61642	4.6368	0.00501019	0.0427793	-2.53334	Numbl	numb-like (Numbl)	NM_010950	87042276	7	2191	CAUCCCU	2185	3UTR	0.0442	1		Clcn7	chloride channel 7 (Clcn7)	NM_011930	141802324
mmu-miR-188-5p	2.70078	3.61642	4.6368	0.00501019	0.0427793	-2.53334	Acoxl	acyl-Coenzyme A oxidase-like (Acoxl)	NM_028765	227452354	7	2567	CAUCCCU	2561	3UTR	0.044	1		Cldn1	claudin 1 (Cldn1)	NM_016674	302129694
mmu-miR-188-5p	2.70078	3.61642	4.6368	0.00501019	0.0427793	-2.53334	Tal2	T cell acute lymphocytic leukemia 2 (Tal2)	NM_009317	142369795	7	836	CAUCCCU	830	3UTR	0.044	1		Cldn12	claudin 12 (Cldn12)	NM_022890	255958179
mmu-miR-188-5p	2.70078	3.61642	4.6368	0.00501019	0.0427793	-2.53334	6330527O06Rik	lysosomal-associated membrane protein family, member 5 (Lamp5)	NM_029530	82546884	7	1395	CAUCCCU	1389	3UTR	0.0439	1		Cldn14	claudin 14 (Cldn14)	NM_019500	260764014
mmu-miR-188-5p	2.70078	3.61642	4.6368	0.00501019	0.0427793	-2.53334	6430598A04Rik	neuronal tyrosine-phosphorylated phosphoinositide 3-kinase adaptor 1 (Nyap1)	NM_175521	37537543	7	3431	CAUCCCU	3425	3UTR	0.0439	1		Cldn23	claudin 23 (Cldn23)	NM_027998	303227905
mmu-miR-188-5p	2.70078	3.61642	4.6368	0.00501019	0.0427793	-2.53334	Lrrc8e	leucine rich repeat containing 8 family, member E (Lrrc8e)	NM_028175	251823956	7	3023	CAUCCCU	3017	3UTR	0.0439	1		Cldn5	claudin 5 (Cldn5)	NM_013805	302191609
mmu-miR-188-5p	2.70078	3.61642	4.6368	0.00501019	0.0427793	-2.53334	Nuak1	NUAK family, SNF1-like kinase, 1 (Nuak1)	NM_001004363	52138543	8	4587	CAUCCCUU	4580	3UTR	0.0439	1		Cldn7	claudin 7 (Cldn7)	NM_016887	302318904
mmu-miR-188-5p	2.70078	3.61642	4.6368	0.00501019	0.0427793	-2.53334	Pnma1	paraneoplastic antigen MA1 (Pnma1)	NM_027438	148287012	7	1735	CAUCCCU	1729	3UTR	0.0439	1		Cldn8	claudin 8 (Cldn8)	NM_018778	160333274
mmu-miR-188-5p	2.70078	3.61642	4.6368	0.00501019	0.0427793	-2.53334	BC037112	family with sequence similarity 193, member A	NM_001030306	85701587	7	3891	CAUCCCU	3885	3UTR	0.0438	1		Cldn9	claudin 9 (Cldn9)	NM_020293	302344772
mmu-miR-188-5p	2.70078	3.61642	4.6368	0.00501019	0.0427793	-2.53334	Cyfip1	cytoplasmic FMR1 interacting protein 1 (Cyfip1)	NM_011370	258547113	7	4665	CAUCCCU	4659	3UTR	0.0438	1		Cldnd1	claudin 25 (Cldn25)	NM_171826	356934381
mmu-miR-188-5p	2.70078	3.61642	4.6368	0.00501019	0.0427793	-2.53334	Mgat3	mannoside acetylglucosaminyltransferase 3 (Mgat3)	NM_010795	413081655	8	2298	AUCCCUUG	2291	3UTR	0.0437	2		Clec14a	C-type lectin domain family 14, member a (Clec14a)	NM_025809	237512936
mmu-miR-188-5p	2.70078	3.61642	4.6368	0.00501019	0.0427793	-2.53334	Tfip11	tuftelin interacting protein 11 (Tfip11)	NM_018783	118130732	7	3306	AUCCCUU	3300	3UTR	0.0437	2		Clec16a	C-type lectin domain family 16, member A (Clec16a)	NM_177562	323668267
mmu-miR-188-5p	2.70078	3.61642	4.6368	0.00501019	0.0427793	-2.53334	E130309D02Rik	RIKEN cDNA E130309D02 gene (E130309D02Rik)	NM_172726	170650678	7	1691	CAUCCCU	1685	3UTR	0.0436	1		Clec2e	C-type lectin domain family 2, member e (Clec2e)	NM_153506	324073231
mmu-miR-188-5p	2.70078	3.61642	4.6368	0.00501019	0.0427793	-2.53334	Gpx3	glutathione peroxidase 3 (Gpx3)	NM_008161	378744204	7	961	CAUCCCU	955	3UTR	0.0435	1		Clec2h	C-type lectin domain family 2, member h (Clec2h)	NM_053165	323714234
mmu-miR-188-5p	2.70078	3.61642	4.6368	0.00501019	0.0427793	-2.53334	Lrriq2	centrosomal protein 97 (Cep97)	NM_028815	226823267	8	2962	CAUCCCUU	2955	3UTR	0.0434	1		Clec4a1	C-type lectin domain family 4, member a1 (Clec4a1)	NM_199311	323714241
mmu-miR-188-5p	2.70078	3.61642	4.6368	0.00501019	0.0427793	-2.53334	2310022M17Rik	biorientation of chromosomes in cell division 1 (Bod1)	NM_001024919	67906186	7	1286	CAUCCCU	1280	3UTR	0.0433	1		Clec4g	C-type lectin domain family 4, member g (Clec4g)	NM_029465	227908795
mmu-miR-188-5p	2.70078	3.61642	4.6368	0.00501019	0.0427793	-2.53334	AI597468	transmembrane protein 263 (Tmem263)	NM_001013028	227430350	8	3572	CAUCCCUU	3565	3UTR	0.0433	1		Clec9a	C-type lectin domain family 9, member a (Clec9a)	NM_172732	329299051
mmu-miR-188-5p	2.70078	3.61642	4.6368	0.00501019	0.0427793	-2.53334	Gpr35	G protein-coupled receptor 35 (Gpr35)	NM_022320	157267233	8	2853	CAUCCCUU	2846	3UTR	0.0433	1		Clip2	CAP-GLY domain containing linker protein 2 (Clip2)	NM_009990	551411693
mmu-miR-188-5p	2.70078	3.61642	4.6368	0.00501019	0.0427793	-2.53334	Limch1	LIM and calponin homology domains 1 (Limch1)	NM_001001980	134053895	8	4621	CAUCCCUU	4614	3UTR	0.0433	1		Clip3	CAP-GLY domain containing linker protein 3 (Clip3)	NM_001081114	124487424
mmu-miR-188-5p	2.70078	3.61642	4.6368	0.00501019	0.0427793	-2.53334	Chrna1	cholinergic receptor, nicotinic, alpha polypeptide 1 (muscle) (Chrna1)	NM_007389	425905338	8	3955	CAUCCCUU	3948	3UTR	0.0432	1		Clk4	CDC like kinase 4 (Clk4)	NM_007714	158508667
mmu-miR-188-5p	2.70078	3.61642	4.6368	0.00501019	0.0427793	-2.53334	Rptn	repetin (Rptn)	NM_009100	112421059	7	3807	AUCCCUU	3801	3UTR	0.0432	2		Clp1	CLP1, cleavage and polyadenylation factor I subunit (Clp1)	NM_133840	118130843
mmu-miR-188-5p	2.70078	3.61642	4.6368	0.00501019	0.0427793	-2.53334	Susd2	sushi domain containing 2 (Susd2)	NM_027890	251823823	7	2791	AUCCCUU	2785	3UTR	0.0432	2		Clpb	ClpB caseinolytic peptidase B (Clpb)	NM_009191	118130483
mmu-miR-188-5p	2.70078	3.61642	4.6368	0.00501019	0.0427793	-2.53334	Mpg	N-methylpurine-DNA glycosylase (Mpg)	NM_010822	268370033	7	1258	AUCCCUU	1252	3UTR	0.0429	2		Clptm1	cleft lip and palate associated transmembrane protein 1 (Clptm1)	NM_019649	103472024
mmu-miR-188-5p	2.70078	3.61642	4.6368	0.00501019	0.0427793	-2.53334	Rassf1	Ras association (RalGDS/AF-6) domain family member 1 (Rassf1)	NM_019713	344217755	7	1584	AUCCCUU	1578	3UTR	0.0427	2		Clstn2	calsyntenin 2 (Clstn2)	NM_022319	40254526
mmu-miR-188-5p	2.70078	3.61642	4.6368	0.00501019	0.0427793	-2.53334	Pgm3	phosphoglucomutase 3 (Pgm3)	NM_028352	255522938	8	3727	CAUCCCUU	3720	3UTR	0.0424	1		Cmtm4	CKLF-like MARVEL transmembrane domain containing 4 (Cmtm4)	NM_153582	343432599
mmu-miR-188-5p	2.70078	3.61642	4.6368	0.00501019	0.0427793	-2.53334	Tns3	tensin 3 (Tns3)	NM_001083587	134152675	8	5821	CAUCCCUU	5814	3UTR	0.0424	1		CN716893	melanoma antigen, family B, 4 (Mageb4)	NM_001033492	111378380
mmu-miR-188-5p	2.70078	3.61642	4.6368	0.00501019	0.0427793	-2.53334	Tns3	tensin 3 (Tns3)	NM_001083587	134152675	8	5166	CAUCCCUU	5159	3UTR	0.0424	1		Cndp2	CNDP dipeptidase 2 (metallopeptidase M20 family) (Cndp2)	NM_023149	575501606
mmu-miR-188-5p	2.70078	3.61642	4.6368	0.00501019	0.0427793	-2.53334	Hnf4a	hepatic nuclear factor 4, alpha (Hnf4a)	NM_008261	46575915	8	2648	CAUCCCUU	2641	3UTR	0.0422	1		Cnfn	cornifelin (Cnfn)	NM_001081375	124487008
mmu-miR-188-5p	2.70078	3.61642	4.6368	0.00501019	0.0427793	-2.53334	Mta2	metastasis-associated gene family, member 2 (Mta2)	NM_011842	51491879	7	2771	AUCCCUU	2765	3UTR	0.0422	2		Cnga2	cyclic nucleotide gated channel alpha 2 (Cnga2)	NM_007724	31982858
mmu-miR-188-5p	2.70078	3.61642	4.6368	0.00501019	0.0427793	-2.53334	Ucp2	uncoupling protein 2 (mitochondrial, proton carrier) (Ucp2)	NM_011671	674274950	8	1685	CAUCCCUU	1678	3UTR	0.0422	1		Cnih2	cornichon homolog 2 (Drosophila) (Cnih2)	NM_009920	696221392
mmu-miR-188-5p	2.70078	3.61642	4.6368	0.00501019	0.0427793	-2.53334	Dok7	docking protein 7 (Dok7)	NM_172708	146198807	7	1837	CAUCCCU	1831	3UTR	0.0421	1		Cnih3	cornichon homolog 3 (Drosophila) (Cnih3)	NM_028408	237649027
mmu-miR-188-5p	2.70078	3.61642	4.6368	0.00501019	0.0427793	-2.53334	BC057371	ribosomal modification protein rimK-like family member A (Rimkla)	NM_177572	253795526	8	3502	CAUCCCUU	3495	3UTR	0.042	1		Cnksr3	Cnksr family member 3 (Cnksr3)	NM_172546	141802317
mmu-miR-188-5p	2.70078	3.61642	4.6368	0.00501019	0.0427793	-2.53334	2310047M10Rik	RIKEN cDNA 2310047M10 gene (2310047M10Rik)	NM_028005	142369094	7	1320	AUCCCUU	1314	3UTR	0.0416	2		Cnn2	calponin 2 (Cnn2)	NM_007725	116268119
mmu-miR-188-5p	2.70078	3.61642	4.6368	0.00501019	0.0427793	-2.53334	Akirin2	akirin 2 (Akirin2)	NM_001007589	87080824	7	1316	AUCCCUU	1310	3UTR	0.0414	2		Cnot3	CCR4-NOT transcription complex, subunit 3 (Cnot3)	NM_146176	294345476
mmu-miR-188-5p	2.70078	3.61642	4.6368	0.00501019	0.0427793	-2.53334	Slc12a2	solute carrier family 12, member 2 (Slc12a2)	NM_009194	206597463	8	5089	AUCCCUUG	5082	3UTR	0.0414	2		Cnot6	CCR4-NOT transcription complex, subunit 6 (Cnot6)	NM_212484	595582328
mmu-miR-188-5p	2.70078	3.61642	4.6368	0.00501019	0.0427793	-2.53334	Tm4sf1	transmembrane 4 superfamily member 1 (Tm4sf1)	NM_008536	88900519	7	1411	AUCCCUU	1405	3UTR	0.0414	2		Cnpy1	canopy 1 homolog (zebrafish) (Cnpy1)	NM_175651	146198765
mmu-miR-188-5p	2.70078	3.61642	4.6368	0.00501019	0.0427793	-2.53334	Rdh1	retinol dehydrogenase 1 (all trans) (Rdh1)	NM_080436	165377240	8	1330	AUCCCUUG	1323	3UTR	0.0413	2		Cnrip1	cannabinoid receptor interacting protein 1 (Cnrip1)	NM_029861	141802989
mmu-miR-188-5p	2.70078	3.61642	4.6368	0.00501019	0.0427793	-2.53334	Slain2	SLAIN motif family, member 2 (Slain2)	NM_153567	558472819	8	3692	CAUCCCUU	3685	3UTR	0.0413	1		Cntn3	contactin 3 (Cntn3)	NM_008779	117938276
mmu-miR-188-5p	2.70078	3.61642	4.6368	0.00501019	0.0427793	-2.53334	Tead2	TEA domain family member 2 (Tead2)	NM_011565	31560533	7	1975	CAUCCCU	1969	3UTR	0.0413	1		Cntnap2	contactin associated protein-like 2 (Cntnap2)	NM_001004357	165377149
mmu-miR-188-5p	2.70078	3.61642	4.6368	0.00501019	0.0427793	-2.53334	Olfr722	olfactory receptor 722 (Olfr722)	NM_146494	34328366	7	1385	AUCCCUU	1379	3UTR	0.0412	2		Cntnap4	contactin associated protein-like 4 (Cntnap4)	NM_130457	31982590
mmu-miR-188-5p	2.70078	3.61642	4.6368	0.00501019	0.0427793	-2.53334	Spnb1	spectrin beta, erythrocytic (Sptb)	NM_013675	84490393	8	9515	AUCCCUUG	9508	3UTR	0.0412	2		Cntnap5b	contactin associated protein-like 5B (Cntnap5b)	NM_172851	128485745
mmu-miR-188-5p	2.70078	3.61642	4.6368	0.00501019	0.0427793	-2.53334	2310067B10Rik	RIKEN cDNA 2310067B10 gene (2310067B10Rik)	NM_028014	112421147	7	4583	AUCCCUU	4577	3UTR	0.041	2		Cog3	component of oligomeric golgi complex 3 (Cog3)	NM_177381	119392069
mmu-miR-188-5p	2.70078	3.61642	4.6368	0.00501019	0.0427793	-2.53334	Ccdc130	coiled-coil domain containing 130 (Ccdc130)	NM_026350	659928101	7	1906	CAUCCCU	1900	3UTR	0.041	1		Cog7	component of oligomeric golgi complex 7 (Cog7)	NM_001033318	141802214
mmu-miR-188-5p	2.70078	3.61642	4.6368	0.00501019	0.0427793	-2.53334	Olfr536	olfactory receptor 536 (Olfr536)	NM_146520	40254193	8	1215	AUCCCUUG	1208	3UTR	0.041	2		Cog8	component of oligomeric golgi complex 8 (Cog8)	NM_139229	255003821
mmu-miR-188-5p	2.70078	3.61642	4.6368	0.00501019	0.0427793	-2.53334	Cdc6	cell division cycle 6 (Cdc6)	NM_011799	71061472	8	4370	CAUCCCUU	4363	3UTR	0.0409	1		Coil	coilin (Coil)	NM_016706	134053928
mmu-miR-188-5p	2.70078	3.61642	4.6368	0.00501019	0.0427793	-2.53334	Rfc5	replication factor C (activator 1) 5 (Rfc5)	NM_028128	110625923	7	1200	CAUCCCU	1194	3UTR	0.0409	1		Col11a1	collagen, type XI, alpha 1 (Col11a1)	NM_007729	124487345
mmu-miR-188-5p	2.70078	3.61642	4.6368	0.00501019	0.0427793	-2.53334	Spred3	sprouty-related, EVH1 domain containing 3 (Spred3)	NM_182927	188219586	8	3320	AUCCCUUG	3313	3UTR	0.0409	2		Col14a1	collagen, type XIV, alpha 1 (Col14a1)	NM_181277	226423921
mmu-miR-188-5p	2.70078	3.61642	4.6368	0.00501019	0.0427793	-2.53334	Tgm4	transglutaminase 4 (prostate) (Tgm4)	NM_177911	227500025	7	2188	CAUCCCU	2182	3UTR	0.0409	1		Col18a1	collagen, type XVIII, alpha 1 (Col18a1)	NM_009929	158508556
mmu-miR-188-5p	2.70078	3.61642	4.6368	0.00501019	0.0427793	-2.53334	Tslp	thymic stromal lymphopoietin (Tslp)	NM_021367	283945612	7	554	AUCCCUU	548	3UTR	0.0409	2		Col19a1	collagen, type XIX, alpha 1 (Col19a1)	NM_007733	114326514
mmu-miR-188-5p	2.70078	3.61642	4.6368	0.00501019	0.0427793	-2.53334	2310007B03Rik	RIKEN cDNA 2310007B03 gene (2310007B03Rik)	NM_172411	229576964	7	1714	CAUCCCU	1708	3UTR	0.0408	1		Col1a2	collagen, type I, alpha 2 (Col1a2)	NM_007743	111120328
mmu-miR-188-5p	2.70078	3.61642	4.6368	0.00501019	0.0427793	-2.53334	9430070O13Rik	RIKEN cDNA 9430070O13 gene	NM_001033180	142353474	7	1759	CAUCCCU	1753	3UTR	0.0408	1		Col24a1	collagen, type XXIV, alpha 1 (Col24a1)	NM_027770	116326000
mmu-miR-188-5p	2.70078	3.61642	4.6368	0.00501019	0.0427793	-2.53334	Grhl2	grainyhead-like 2 (Drosophila) (Grhl2)	NM_026496	274320613	8	4099	AUCCCUUG	4092	3UTR	0.0408	2		Col25a1	collagen, type XXV, alpha 1 (Col25a1)	NM_198711	350276170
mmu-miR-188-5p	2.70078	3.61642	4.6368	0.00501019	0.0427793	-2.53334	Kcng1	potassium voltage-gated channel, subfamily G, member 1 (Kcng1)	NM_001081134	124487486	7	2162	CAUCCCU	2156	3UTR	0.0408	1		Col27a1	collagen, type XXVII, alpha 1 (Col27a1)	NM_025685	116063545
mmu-miR-188-5p	2.70078	3.61642	4.6368	0.00501019	0.0427793	-2.53334	Stxbp4	syntaxin binding protein 4 (Stxbp4)	NM_011505	226958335	7	2713	CAUCCCU	2707	3UTR	0.0408	1		Col3a1	collagen, type III, alpha 1 (Col3a1)	NM_009930	226423932
mmu-miR-188-5p	2.70078	3.61642	4.6368	0.00501019	0.0427793	-2.53334	Polr3d	polymerase (RNA) III (DNA directed) polypeptide D (Polr3d)	NM_025945	256225459	7	1678	CAUCCCU	1672	3UTR	0.0407	1		Col4a3	collagen, type IV, alpha 3 (Col4a3)	NM_007734	145699100
mmu-miR-188-5p	2.70078	3.61642	4.6368	0.00501019	0.0427793	-2.53334	Fgd3	FYVE, RhoGEF and PH domain containing 3 (Fgd3)	NM_015759	85719308	7	2518	AUCCCUU	2512	3UTR	0.0403	2		Col4a4	collagen, type IV, alpha 4 (Col4a4)	NM_007735	145699103
mmu-miR-188-5p	2.70078	3.61642	4.6368	0.00501019	0.0427793	-2.53334	Lep	leptin (Lep)	NM_008493	34328437	8	2856	CAUCCCUU	2849	3UTR	0.0403	1		Col5a2	collagen, type V, alpha 2 (Col5a2)	NM_007737	86613789
mmu-miR-188-5p	2.70078	3.61642	4.6368	0.00501019	0.0427793	-2.53334	2810002I04Rik	zinc finger, C2HC-type containing 1C (Zc2hc1c)	NM_172414	268370212	8	1806	CAUCCCUU	1799	3UTR	0.0401	1		Col5a3	collagen, type V, alpha 3 (Col5a3)	NM_016919	118130822
mmu-miR-188-5p	2.70078	3.61642	4.6368	0.00501019	0.0427793	-2.53334	Fut8	fucosyltransferase 8 (Fut8)	NM_016893	357933608	7	2602	AUCCCUU	2596	3UTR	0.0401	2		Col6a1	collagen, type VI, alpha 1 (Col6a1)	NM_009933	227116285
mmu-miR-188-5p	2.70078	3.61642	4.6368	0.00501019	0.0427793	-2.53334	Ppil1	peptidylprolyl isomerase (cyclophilin)-like 1 (Ppil1)	NM_026845	158508644	7	1011	CAUCCCU	1005	3UTR	0.0401	1		Col6a2	collagen, type VI, alpha 2 (Col6a2)	NM_146007	163965432
mmu-miR-188-5p	2.70078	3.61642	4.6368	0.00501019	0.0427793	-2.53334	Slc6a4	solute carrier family 6 (neurotransmitter transporter, serotonin)	NM_010484	195972806	7	2491	CAUCCCU	2485	3UTR	0.0398	1		Col7a1	dynein, axonemal, light chain 1 (Dnal1)	NM_028821	164607161
mmu-miR-188-5p	2.70078	3.61642	4.6368	0.00501019	0.0427793	-2.53334	Abca2	ATP-binding cassette, sub-family A (ABC1)	NM_007379	110225378	7	7422	CAUCCCU	7416	3UTR	0.0397	1		Col9a1	collagen, type IX, alpha 1 (Col9a1)	NM_007740	226693379
mmu-miR-188-5p	2.70078	3.61642	4.6368	0.00501019	0.0427793	-2.53334	Exdl1	exonuclease 3'-5' domain containing 1 (Exd1)	NM_172857	142351361	7	2760	CAUCCCU	2754	3UTR	0.0396	1		Col9a3	collagen, type IX, alpha 3 (Col9a3)	NM_009936	112363118
mmu-miR-188-5p	2.70078	3.61642	4.6368	0.00501019	0.0427793	-2.53334	Fbxl7	F-box and leucine-rich repeat protein 7 (Fbxl7)	NM_176959	61657904	8	3315	CAUCCCUU	3308	3UTR	0.0396	1		Colec11	collectin sub-family member 11 (Colec11)	NM_027866	103472133
mmu-miR-188-5p	2.70078	3.61642	4.6368	0.00501019	0.0427793	-2.53334	Pak6	p21 protein (Cdc42/Rac)-activated kinase 6 (Pak6)	NM_001033254	224994206	7	3813	CAUCCCU	3807	3UTR	0.0396	1		Commd7	COMM domain containing 7 (Commd7)	NM_133850	306035197
mmu-miR-188-5p	2.70078	3.61642	4.6368	0.00501019	0.0427793	-2.53334	Cecr5	cat eye syndrome chromosome region, candidate 5 (Cecr5)	NM_144815	51093868	7	1460	AUCCCUU	1454	3UTR	0.0394	2		Comt	catechol-O-methyltransferase (Comt)	NM_007744	161484633
mmu-miR-188-5p	2.70078	3.61642	4.6368	0.00501019	0.0427793	-2.53334	Gbx2	gastrulation brain homeobox 2 (Gbx2)	NM_010262	133892275	7	1727	AUCCCUU	1721	3UTR	0.0394	2		Comtd1	catechol-O-methyltransferase domain containing 1 (Comtd1)	NM_026965	142371609
mmu-miR-188-5p	2.70078	3.61642	4.6368	0.00501019	0.0427793	-2.53334	Cnih3	cornichon homolog 3 (Drosophila) (Cnih3)	NM_028408	237649027	7	1749	CAUCCCU	1743	3UTR	0.0393	1		Copa	coatomer protein complex subunit alpha (Copa)	NM_009938	226823358
mmu-miR-188-5p	2.70078	3.61642	4.6368	0.00501019	0.0427793	-2.53334	Rragb	Ras-related GTP binding B (Rragb)	NM_001004154	211938436	7	2166	CAUCCCU	2160	3UTR	0.0393	1		Cops2	COP9 (constitutive photomorphogenic) homolog, subunit 2 (Arabidopsis thaliana) (Cops2)	NM_009939	551895152
mmu-miR-188-5p	2.70078	3.61642	4.6368	0.00501019	0.0427793	-2.53334	Hook3	hook homolog 3 (Drosophila) (Hook3)	NM_207659	169234754	9	5251	AUCCCUUGC	5243	3UTR	0.0391	2		Cops4	COP9 (constitutive photomorphogenic) homolog, subunit 4 (Arabidopsis thaliana) (Cops4)	NM_012001	255760045
mmu-miR-188-5p	2.70078	3.61642	4.6368	0.00501019	0.0427793	-2.53334	Pcdh17	protocadherin 17 (Pcdh17)	NM_001013753	260763907	7	3979	CAUCCCU	3973	3UTR	0.0391	1		Cops6	COP9 (constitutive photomorphogenic) homolog, subunit 6 (Arabidopsis thaliana) (Cops6)	NM_012002	146134430
mmu-miR-188-5p	2.70078	3.61642	4.6368	0.00501019	0.0427793	-2.53334	Unc5b	unc-5 homolog B (C. elegans) (Unc5b)	NM_029770	85861261	8	4475	CAUCCCUU	4468	3UTR	0.0391	1		Cops7a	COP9 (constitutive photomorphogenic) homolog, subunit 7a (Arabidopsis thaliana) (Cops7a)	NM_012003	255760050
mmu-miR-188-5p	2.70078	3.61642	4.6368	0.00501019	0.0427793	-2.53334	Med23	mediator complex subunit 23 (Med23)	NM_027347	261878546	7	4685	AUCCCUU	4679	3UTR	0.039	2		Cops7b	COP9 (constitutive photomorphogenic) homolog, subunit 7b (Arabidopsis thaliana) (Cops7b)	NM_172974	118129901
mmu-miR-188-5p	2.70078	3.61642	4.6368	0.00501019	0.0427793	-2.53334	Irs4	insulin receptor substrate 4 (Irs4)	NM_010572	58331137	8	5336	CAUCCCUU	5329	3UTR	0.0389	1		Coq2	coenzyme Q2 homolog, prenyltransferase (yeast) (Coq2)	NM_027978	167004226
mmu-miR-188-5p	2.70078	3.61642	4.6368	0.00501019	0.0427793	-2.53334	Rbmx2	RNA binding motif protein, X-linked 2 (Rbmx2)	NM_173376	146198607	7	1570	CAUCCCU	1564	3UTR	0.0389	1		Coq4	coenzyme Q4 homolog (yeast) (Coq4)	NM_178693	146198610
mmu-miR-188-5p	2.70078	3.61642	4.6368	0.00501019	0.0427793	-2.53334	Neo1	neogenin (Neo1)	NM_008684	112363081	8	6856	CAUCCCUU	6849	3UTR	0.0388	1		Coq5	coenzyme Q5 homolog, methyltransferase (yeast) (Coq5)	NM_026504	142378282
mmu-miR-188-5p	2.70078	3.61642	4.6368	0.00501019	0.0427793	-2.53334	Wscd1	WSC domain containing 1 (Wscd1)	NM_177618	42475951	7	2301	CAUCCCU	2295	3UTR	0.0388	1		Coro1b	coronin, actin binding protein 1B (Coro1b)	NM_011778	142388278
mmu-miR-188-5p	2.70078	3.61642	4.6368	0.00501019	0.0427793	-2.53334	Cspp1	centrosome and spindle pole associated protein 1 (Cspp1)	NM_026493	124301209	7	4213	AUCCCUU	4207	3UTR	0.0387	2		Coro1c	coronin, actin binding protein 1C (Coro1c)	NM_011779	142365603
mmu-miR-188-5p	2.70078	3.61642	4.6368	0.00501019	0.0427793	-2.53334	Zfp68	zinc finger protein 68 (Zfp68)	NM_013844	113681056	8	3534	CAUCCCUU	3527	3UTR	0.0387	1		Coro7	coronin 7 (Coro7)	NM_030205	148747330
mmu-miR-188-5p	2.70078	3.61642	4.6368	0.00501019	0.0427793	-2.53334	Zfp68	zinc finger protein 68 (Zfp68)	NM_013844	113681056	8	2237	AUCCCUUG	2230	3UTR	0.0387	2		Cort	cortistatin (Cort)	NM_007745	142376224
mmu-miR-188-5p	2.70078	3.61642	4.6368	0.00501019	0.0427793	-2.53334	Ptk6	PTK6 protein tyrosine kinase 6 (Ptk6)	NM_009184	133893003	7	1743	AUCCCUU	1737	3UTR	0.0386	2		Cox10	cytochrome c oxidase assembly protein 10 (Cox10)	NM_178379	285026455
mmu-miR-188-5p	2.70078	3.61642	4.6368	0.00501019	0.0427793	-2.53334	Hdac3	histone deacetylase 3 (Hdac3)	NM_010411	89257351	7	1563	CAUCCCU	1557	3UTR	0.0385	1		Cox7b	cytochrome c oxidase subunit VIIb (Cox7b)	NM_025379	70909318
mmu-miR-188-5p	2.70078	3.61642	4.6368	0.00501019	0.0427793	-2.53334	Higd1c	methyltransferase hypoxia inducible domain containing 1 (Methig1)	NM_001024672	142351323	7	1164	AUCCCUU	1158	3UTR	0.0385	2		Cpa4	carboxypeptidase A4 (Cpa4)	NM_027926	141802681
mmu-miR-188-5p	2.70078	3.61642	4.6368	0.00501019	0.0427793	-2.53334	Brunol4	CUGBP, Elav-like family member 4 (Celf4)	NM_133195	226371656	7	3331	CAUCCCU	3325	3UTR	0.0384	1		Cpd	carboxypeptidase D (Cpd)	NM_007754	150378500
mmu-miR-188-5p	2.70078	3.61642	4.6368	0.00501019	0.0427793	-2.53334	Dlc1	deleted in liver cancer 1 (Dlc1)	NM_015802	302699222	8	4022	CAUCCCUU	4015	3UTR	0.0384	1		Cplx1	complexin 1 (Cplx1)	NM_007756	227330543
mmu-miR-188-5p	2.70078	3.61642	4.6368	0.00501019	0.0427793	-2.53334	Eif5a	eukaryotic translation initiation factor 5A (Eif5a)	NM_181582	262359892	7	926	AUCCCUU	920	3UTR	0.0381	2		Cplx3	complexin 3 (Cplx3)	NM_146223	256574830
mmu-miR-188-5p	2.70078	3.61642	4.6368	0.00501019	0.0427793	-2.53334	Pdk1	pyruvate dehydrogenase kinase, isoenzyme 1 (Pdk1)	NM_172665	560879433	8	1959	AUCCCUUG	1952	3UTR	0.0381	2		Cpne3	copine III (Cpne3)	NM_027769	62530190
mmu-miR-188-5p	2.70078	3.61642	4.6368	0.00501019	0.0427793	-2.53334	Plekhb2	pleckstrin homology domain containing, family B (evectins) member 2 (Plekhb2)	NM_145516	119637809	8	1096	CAUCCCUU	1089	3UTR	0.038	1		Cpsf2	cleavage and polyadenylation specific factor 2 (Cpsf2)	NM_016856	237513003
mmu-miR-188-5p	2.70078	3.61642	4.6368	0.00501019	0.0427793	-2.53334	Arfip2	ADP-ribosylation factor interacting protein 2 (Arfip2)	NM_029802	228008330	7	2331	CAUCCCU	2325	3UTR	0.0378	1		Cpsf3l	cleavage and polyadenylation specific factor 3-like (Cpsf3l)	NM_028020	142377466
mmu-miR-188-5p	2.70078	3.61642	4.6368	0.00501019	0.0427793	-2.53334	Slamf7	SLAM family member 7 (Slamf7)	NM_144539	158508723	8	2442	CAUCCCUU	2435	3UTR	0.0378	1		Cpsf4	cleavage and polyadenylation specific factor 4 (Cpsf4)	NM_178576	601983198
mmu-miR-188-5p	2.70078	3.61642	4.6368	0.00501019	0.0427793	-2.53334	Zfp330	zinc finger protein 330 (Zfp330)	NM_145600	21704207	7	1162	CAUCCCU	1156	3UTR	0.0378	1		Cpsf6	cleavage and polyadenylation specific factor 6 (Cpsf6)	NM_001013391	226491040
mmu-miR-188-5p	2.70078	3.61642	4.6368	0.00501019	0.0427793	-2.53334	Ceacam9	carcinoembryonic antigen-related cell adhesion molecule 9 (Ceacam9)	NM_011927	158508511	7	1009	AUCCCUU	1003	3UTR	0.0376	2		Cpt2	carnitine palmitoyltransferase 2 (Cpt2)	NM_009949	162138914
mmu-miR-188-5p	2.70078	3.61642	4.6368	0.00501019	0.0427793	-2.53334	Gjb1	gap junction protein, beta 1 (Gjb1)	NM_008124	699114746	7	1267	CAUCCCU	1261	3UTR	0.0376	1		Cr2	complement receptor 2 (Cr2)	NM_007758	114326525
mmu-miR-188-5p	2.70078	3.61642	4.6368	0.00501019	0.0427793	-2.53334	Gjb1	gap junction protein, beta 1 (Gjb1)	NM_008124	699114746	7	1173	CAUCCCU	1167	3UTR	0.0376	1		Crabp1	cellular retinoic acid binding protein I (Crabp1)	NM_013496	549806818
mmu-miR-188-5p	2.70078	3.61642	4.6368	0.00501019	0.0427793	-2.53334	Gjb1	gap junction protein, beta 1 (Gjb1)	NM_008124	699114746	7	1317	AUCCCUU	1311	3UTR	0.0376	2		Crat	carnitine acetyltransferase (Crat)	NM_007760	86198337
mmu-miR-188-5p	2.70078	3.61642	4.6368	0.00501019	0.0427793	-2.53334	Zc3h7b	zinc finger CCCH type containing 7B (Zc3h7b)	NM_001081016	124486615	8	4281	CAUCCCUU	4274	3UTR	0.0375	1		Crb3	crumbs homolog 3 (Drosophila) (Crb3)	NM_177638	118130453
mmu-miR-188-5p	2.70078	3.61642	4.6368	0.00501019	0.0427793	-2.53334	4930539E08Rik	RIKEN cDNA 4930539E08 gene (4930539E08Rik)	NM_172450	146149258	8	2625	AUCCCUUG	2618	3UTR	0.0373	2		Crct1	cysteine-rich C-terminal 1 (Crct1)	NM_028798	240848578
mmu-miR-188-5p	2.70078	3.61642	4.6368	0.00501019	0.0427793	-2.53334	Ddx3x	DEAD/H (Asp-Glu-Ala-Asp/His) box polypeptide 3, X-linked (Ddx3x)	NM_010028	164607180	8	3787	CAUCCCUU	3780	3UTR	0.0373	1		Creb3	cAMP responsive element binding protein 3 (Creb3)	NM_013497	141801684
mmu-miR-188-5p	2.70078	3.61642	4.6368	0.00501019	0.0427793	-2.53334	D2Wsu81e	DNA segment, Chr 2, Wayne State University 81, expressed (D2Wsu81e)	NM_172660	305682576	7	1629	CAUCCCU	1623	3UTR	0.0371	1		Creb3l2	cAMP responsive element binding protein 3-like 2 (Creb3l2)	NM_178661	282400148
mmu-miR-188-5p	2.70078	3.61642	4.6368	0.00501019	0.0427793	-2.53334	Pum2	pumilio RNA-binding family member 2 (Pum2)	NM_030723	237649069	7	5279	AUCCCUU	5273	3UTR	0.0371	2		Creb3l3	cAMP responsive element binding protein 3-like 3 (Creb3l3)	NM_145365	141802442
mmu-miR-188-5p	2.70078	3.61642	4.6368	0.00501019	0.0427793	-2.53334	Sema6d	sema domain, transmembrane domain (TM)	NM_172537	597436913	8	4100	CAUCCCUU	4093	3UTR	0.0371	1		Crebl1	activating transcription factor 6 beta (Atf6b)	NM_017406	410812205
mmu-miR-188-5p	2.70078	3.61642	4.6368	0.00501019	0.0427793	-2.53334	Optc	opticin (Optc)	NM_054076	380862356	7	1657	AUCCCUU	1651	3UTR	0.037	2		Creg1	cellular repressor of E1A-stimulated genes 1 (Creg1)	NM_011804	31542419
mmu-miR-188-5p	2.70078	3.61642	4.6368	0.00501019	0.0427793	-2.53334	S100a14	S100 calcium binding protein A14 (S100a14)	NM_025393	298676475	7	759	CAUCCCU	753	3UTR	0.037	1		Creg2	cellular repressor of E1A-stimulated genes 2 (Creg2)	NM_170597	76096370
mmu-miR-188-5p	2.70078	3.61642	4.6368	0.00501019	0.0427793	-2.53334	Zfp787	zinc finger protein 787 (Zfp787)	NM_001013012	67846114	7	1864	AUCCCUU	1858	3UTR	0.0369	2		Crhr1	corticotropin releasing hormone receptor 1 (Crhr1)	NM_007762	145966876
mmu-miR-188-5p	2.70078	3.61642	4.6368	0.00501019	0.0427793	-2.53334	Crkl	v-crk sarcoma virus CT10 oncogene homolog (avian)-like (Crkl)	NM_007764	469832251	8	3432	AUCCCUUG	3425	3UTR	0.0368	2		Crhr2	corticotropin releasing hormone receptor 2 (Crhr2)	NM_009953	568599850
mmu-miR-188-5p	2.70078	3.61642	4.6368	0.00501019	0.0427793	-2.53334	Tmem167b	transmembrane protein 167B (Tmem167b)	NM_026198	225543445	8	451	AUCCCUUG	444	3UTR	0.0368	2		Crip3	cysteine-rich protein 3 (Crip3)	NM_181664	133892348
mmu-miR-188-5p	2.70078	3.61642	4.6368	0.00501019	0.0427793	-2.53334	Traf1	TNF receptor-associated factor 1 (Traf1)	NM_009421	88900511	7	1715	CAUCCCU	1709	3UTR	0.0368	1		Crispld1	cysteine-rich secretory protein LCCL domain containing 1 (Crispld1)	NM_031402	123173745
mmu-miR-188-5p	2.70078	3.61642	4.6368	0.00501019	0.0427793	-2.53334	1190002N15Rik	RIKEN cDNA 1190002N15 gene (1190002N15Rik)	NM_001033145	115392139	8	3203	CAUCCCUU	3196	3UTR	0.0367	1		Crispld2	cysteine-rich secretory protein LCCL domain containing 2 (Crispld2)	NM_030209	190610026
mmu-miR-188-5p	2.70078	3.61642	4.6368	0.00501019	0.0427793	-2.53334	H2-M2	histocompatibility 2, M region locus 2 (H2-M2)	NM_008204	118130900	7	1371	AUCCCUU	1365	3UTR	0.0367	2		Crkl	v-crk sarcoma virus CT10 oncogene homolog (avian)-like (Crkl)	NM_007764	469832251
mmu-miR-188-5p	2.70078	3.61642	4.6368	0.00501019	0.0427793	-2.53334	Il4ra	interleukin 4 receptor, alpha (Il4ra)	NM_001008700	111186475	8	2886	AUCCCUUG	2879	3UTR	0.0367	2		Crlf2	cytokine receptor-like factor 2 (Crlf2)	NM_016715	257900525
mmu-miR-188-5p	2.70078	3.61642	4.6368	0.00501019	0.0427793	-2.53334	Pts	6-pyruvoyl-tetrahydropterin synthase (Pts)	NM_011220	31982767	7	882	AUCCCUU	876	3UTR	0.0366	2		Crocc	ciliary rootlet coiled-coil, rootletin (Crocc)	NM_172122	225543190
mmu-miR-188-5p	2.70078	3.61642	4.6368	0.00501019	0.0427793	-2.53334	Mnx1	motor neuron and pancreas homeobox 1 (Mnx1)	NM_019944	226530952	7	1436	CAUCCCU	1430	3UTR	0.0364	1		Crot	carnitine O-octanoyltransferase (Crot)	NM_023733	142387204
mmu-miR-188-5p	2.70078	3.61642	4.6368	0.00501019	0.0427793	-2.53334	Rab33b	RAB33B, member RAS oncogene family (Rab33b)	NM_016858	145301587	8	2141	CAUCCCUU	2134	3UTR	0.0364	1		Crtac1	cartilage acidic protein 1 (Crtac1)	NM_145123	142350981
mmu-miR-188-5p	2.70078	3.61642	4.6368	0.00501019	0.0427793	-2.53334	Lpl	lipoprotein lipase (Lpl)	NM_008509	126723005	8	3561	AUCCCUUG	3554	3UTR	0.0363	2		Crtam	cytotoxic and regulatory T cell molecule (Crtam)	NM_019465	530339635
mmu-miR-188-5p	2.70078	3.61642	4.6368	0.00501019	0.0427793	-2.53334	Cc2d1b	coiled-coil and C2 domain containing 1B (Cc2d1b)	NM_177045	142373435	7	2994	CAUCCCU	2988	3UTR	0.0362	1		Crtap	cartilage associated protein (Crtap)	NM_019922	225543172
mmu-miR-188-5p	2.70078	3.61642	4.6368	0.00501019	0.0427793	-2.53334	Snn	stannin (Snn)	NM_009223	157951644	8	2793	CAUCCCUU	2786	3UTR	0.0362	1		Crtc2	CREB regulated transcription coactivator 2 (Crtc2)	NM_028881	254028192
mmu-miR-188-5p	2.70078	3.61642	4.6368	0.00501019	0.0427793	-2.53334	AC123697.19	guanylate binding protein 6 (Gbp6)	NM_194336	170650636	8	2754	CAUCCCUU	2747	3UTR	0.0361	1		Cry2	cryptochrome 2 (photolyase-like) (Cry2)	NM_009963	164519085
mmu-miR-188-5p	2.70078	3.61642	4.6368	0.00501019	0.0427793	-2.53334	Csf2ra	colony stimulating factor 2 receptor, alpha, low-affinity (granulocyte-macrophage) (Csf2ra)	NM_009970	160707972	7	1621	CAUCCCU	1615	3UTR	0.0361	1		Crym	crystallin, mu (Crym)	NM_016669	7710011
mmu-miR-188-5p	2.70078	3.61642	4.6368	0.00501019	0.0427793	-2.53334	2210010N04Rik	tectonin beta-propeller repeat containing 1 (Tecpr1)	NM_027410	124249057	7	3802	CAUCCCU	3796	3UTR	0.036	1		Csf1r	colony stimulating factor 1 receptor (Csf1r)	NM_001037859	126723422
mmu-miR-188-5p	2.70078	3.61642	4.6368	0.00501019	0.0427793	-2.53334	2510003E04Rik	RIKEN cDNA 2510003E04 gene (2510003E04Rik)	NM_028197	72384370	7	2036	CAUCCCU	2030	3UTR	0.036	1		Csf2ra	colony stimulating factor 2 receptor, alpha, low-affinity (granulocyte-macrophage) (Csf2ra)	NM_009970	160707972
mmu-miR-188-5p	2.70078	3.61642	4.6368	0.00501019	0.0427793	-2.53334	Bok	BCL2-related ovarian killer (Bok)	NM_016778	118131154	7	1246	CAUCCCU	1240	3UTR	0.036	1		Csk	c-src tyrosine kinase (Csk)	NM_007783	31560711
mmu-miR-188-5p	2.70078	3.61642	4.6368	0.00501019	0.0427793	-2.53334	C130074G19Rik	RIKEN cDNA C130074G19 gene (C130074G19Rik)	NM_178692	121582461	8	2381	CAUCCCUU	2374	3UTR	0.0358	1		Csmd1	CUB and Sushi multiple domains 1 (Csmd1)	NM_053171	124248565
mmu-miR-188-5p	2.70078	3.61642	4.6368	0.00501019	0.0427793	-2.53334	Masp1	mannan-binding lectin serine peptidase 1 (Masp1)	NM_008555	148226523	7	2599	CAUCCCU	2593	3UTR	0.0358	1		Csnk1g1	casein kinase 1, gamma 1 (Csnk1g1)	NM_173185	71773562
mmu-miR-188-5p	2.70078	3.61642	4.6368	0.00501019	0.0427793	-2.53334	Tnrc18	trinucleotide repeat containing 18 (Tnrc18)	NM_178242	31342462	7	5738	CAUCCCU	5732	3UTR	0.0358	1		Csnk1g2	casein kinase 1, gamma 2 (Csnk1g2)	NM_134002	227430314
mmu-miR-188-5p	2.70078	3.61642	4.6368	0.00501019	0.0427793	-2.53334	Adcy6	adenylate cyclase 6 (Adcy6)	NM_007405	86604720	8	4858	AUCCCUUG	4851	3UTR	0.0356	2		Csnk2a2	casein kinase 2, alpha prime polypeptide (Csnk2a2)	NM_009974	164519099
mmu-miR-188-5p	2.70078	3.61642	4.6368	0.00501019	0.0427793	-2.53334	BC060632	metastasis suppressor 1-like (Mtss1l)	NM_198625	38348491	8	4042	CAUCCCUU	4035	3UTR	0.0356	1		Cspg4	chondroitin sulfate proteoglycan 4 (Cspg4)	NM_139001	146231959
mmu-miR-188-5p	2.70078	3.61642	4.6368	0.00501019	0.0427793	-2.53334	Kcnq2	potassium voltage-gated channel, subfamily Q, member 2 (Kcnq2)	NM_001003824	54873640	7	2895	CAUCCCU	2889	3UTR	0.0356	1		Cspp1	centrosome and spindle pole associated protein 1 (Cspp1)	NM_026493	124301209
mmu-miR-188-5p	2.70078	3.61642	4.6368	0.00501019	0.0427793	-2.53334	Stxbp3a	syntaxin binding protein 3A (Stxbp3a)	NM_011504	6755689	7	2067	CAUCCCU	2061	3UTR	0.0355	1		Cst6	cystatin E/M (Cst6)	NM_028623	158508600
mmu-miR-188-5p	2.70078	3.61642	4.6368	0.00501019	0.0427793	-2.53334	5830404H04Rik	C2 calcium-dependent domain containing 2 (C2cd2)	NM_174847	225543529	7	5058	CAUCCCU	5052	3UTR	0.0354	1		Csta	cystatin A1 (Csta1)	NM_001033239	260276636
mmu-miR-188-5p	2.70078	3.61642	4.6368	0.00501019	0.0427793	-2.53334	Lrch1	leucine-rich repeats and calponin homology (CH) domain containing 1 (Lrch1)	NM_001033439	356460935	8	3460	CAUCCCUU	3453	3UTR	0.0354	1		CT025531.9	upstream binding protein 1 (Ubp1)	NM_013699	134031988
mmu-miR-188-5p	2.70078	3.61642	4.6368	0.00501019	0.0427793	-2.53334	Lrrk2	leucine-rich repeat kinase 2 (Lrrk2)	NM_025730	146231953	7	7950	AUCCCUU	7944	3UTR	0.0354	2		Ctage5	CTAGE family, member 5 (Ctage5)	NM_146034	259155333
mmu-miR-188-5p	2.70078	3.61642	4.6368	0.00501019	0.0427793	-2.53334	Thrsp	thyroid hormone responsive (Thrsp)	NM_009381	31560631	7	808	CAUCCCU	802	3UTR	0.0354	1		Ctdp1	CTD (carboxy-terminal domain, RNA polymerase II, polypeptide A) phosphatase, subunit 1 (Ctdp1)	NM_026295	34328279
mmu-miR-188-5p	2.70078	3.61642	4.6368	0.00501019	0.0427793	-2.53334	Il13ra1	interleukin 13 receptor, alpha 1 (Il13ra1)	NM_133990	118129910	8	3579	CAUCCCUU	3572	3UTR	0.0353	1		Ctdspl2	CTD (carboxy-terminal domain, RNA polymerase II, polypeptide A) small phosphatase like 2 (Ctdspl2)	NM_212450	597436909
mmu-miR-188-5p	2.70078	3.61642	4.6368	0.00501019	0.0427793	-2.53334	Psen2	presenilin 2 (Psen2)	NM_011183	327478402	7	1759	CAUCCCU	1753	3UTR	0.0353	1		Ctnnbip1	catenin beta interacting protein 1 (Ctnnbip1)	NM_023465	213513125
mmu-miR-188-5p	2.70078	3.61642	4.6368	0.00501019	0.0427793	-2.53334	Psen2	presenilin 2 (Psen2)	NM_011183	327478402	7	1692	CAUCCCU	1686	3UTR	0.0353	1		Ctr9	Ctr9, Paf1/RNA polymerase II complex component, homolog (S. cerevisiae) (Ctr9)	NM_009431	154090952
mmu-miR-188-5p	2.70078	3.61642	4.6368	0.00501019	0.0427793	-2.53334	Lsm12	LSM12 homolog (S. cerevisiae) (Lsm12)	NM_172947	146198816	7	727	AUCCCUU	721	3UTR	0.0351	2		Cts6	cathepsin 6 (Cts6)	NM_021445	10946819
mmu-miR-188-5p	2.70078	3.61642	4.6368	0.00501019	0.0427793	-2.53334	Mlycd	malonyl-CoA decarboxylase (Mlycd)	NM_019966	56797738	7	1981	CAUCCCU	1975	3UTR	0.035	1		Cts8	cathepsin 8 (Cts8)	NM_019541	187960087
mmu-miR-188-5p	2.70078	3.61642	4.6368	0.00501019	0.0427793	-2.53334	B430306N03Rik	RIKEN cDNA B430306N03 gene (B430306N03Rik)	NM_177083	146198562	8	1870	CAUCCCUU	1863	3UTR	0.0349	1		Ctsd	cathepsin D (Ctsd)	NM_009983	21450788
mmu-miR-188-5p	2.70078	3.61642	4.6368	0.00501019	0.0427793	-2.53334	Dctn4	dynactin 4 (Dctn4)	NM_026302	118131213	8	2233	AUCCCUUG	2226	3UTR	0.0348	2		Ctse	cathepsin E (Ctse)	NM_007799	166235885
mmu-miR-188-5p	2.70078	3.61642	4.6368	0.00501019	0.0427793	-2.53334	Ddx17	DEAD (Asp-Glu-Ala-Asp) box polypeptide 17 (Ddx17)	NM_199080	93587676	8	3875	CAUCCCUU	3868	3UTR	0.0347	1		Ctsh	cathepsin H (Ctsh)	NM_007801	166235889
mmu-miR-188-5p	2.70078	3.61642	4.6368	0.00501019	0.0427793	-2.53334	Ggtl3	gamma-glutamyltransferase 7 (Ggt7)	NM_144786	224994185	7	2321	CAUCCCU	2315	3UTR	0.0347	1		Ctsq	cathepsin Q (Ctsq)	NM_029636	133892435
mmu-miR-188-5p	2.70078	3.61642	4.6368	0.00501019	0.0427793	-2.53334	Snrk	SNF related kinase (Snrk)	NM_133741	257196120	8	3505	AUCCCUUG	3498	3UTR	0.0347	2		Ctsw	cathepsin W (Ctsw)	NM_009985	164664524
mmu-miR-188-5p	2.70078	3.61642	4.6368	0.00501019	0.0427793	-2.53334	Fmr1	fragile X mental retardation syndrome 1 (Fmr1)	NM_008031	594150414	8	2901	CAUCCCUU	2894	3UTR	0.0346	1		Ctsz	cathepsin Z (Ctsz)	NM_022325	133892749
mmu-miR-188-5p	2.70078	3.61642	4.6368	0.00501019	0.0427793	-2.53334	Golm1	golgi membrane protein 1 (Golm1)	NM_001035122	93141216	8	3319	CAUCCCUU	3312	3UTR	0.0344	1		Ctxn1	cortexin 1 (Ctxn1)	NM_183315	158261982
mmu-miR-188-5p	2.70078	3.61642	4.6368	0.00501019	0.0427793	-2.53334	4832428D23Rik	methyltransferase like 21E (Mettl21e)	NM_207281	146198803	8	2685	CAUCCCUU	2678	3UTR	0.0342	1		Cuedc1	CUE domain containing 1 (Cuedc1)	NM_198013	285402461
mmu-miR-188-5p	2.70078	3.61642	4.6368	0.00501019	0.0427793	-2.53334	Dpm2	dolichol-phosphate (beta-D) mannosyltransferase 2 (Dpm2)	NM_010073	31560809	7	323	CAUCCCU	317	3UTR	0.0342	1		Cuedc2	CUE domain containing 2 (Cuedc2)	NM_024192	256773249
mmu-miR-188-5p	2.70078	3.61642	4.6368	0.00501019	0.0427793	-2.53334	Gucy1a3	guanylate cyclase 1, soluble, alpha 3 (Gucy1a3)	NM_021896	240120171	8	4088	AUCCCUUG	4081	3UTR	0.0342	2		Cutl2	cut-like homeobox 2 (Cux2)	NM_007804	40789276
mmu-miR-188-5p	2.70078	3.61642	4.6368	0.00501019	0.0427793	-2.53334	Lrrn2	leucine rich repeat protein 2, neuronal (Lrrn2)	NM_010732	293651542	7	3189	CAUCCCU	3183	3UTR	0.0341	1		Cx3cl1	chemokine (C-X3-C motif) ligand 1 (Cx3cl1)	NM_009142	114431260
mmu-miR-188-5p	2.70078	3.61642	4.6368	0.00501019	0.0427793	-2.53334	Vps25	vacuolar protein sorting 25 (yeast) (Vps25)	NM_026776	548923863	7	949	CAUCCCU	943	3UTR	0.0341	1		Cxcl12	chemokine (C-X-C motif) ligand 12 (Cxcl12)	NM_013655	270309151
mmu-miR-188-5p	2.70078	3.61642	4.6368	0.00501019	0.0427793	-2.53334	Vps25	vacuolar protein sorting 25 (yeast) (Vps25)	NM_026776	548923863	7	684	CAUCCCU	678	3UTR	0.0341	1		Cxcl14	chemokine (C-X-C motif) ligand 14 (Cxcl14)	NM_019568	119392097
mmu-miR-188-5p	2.70078	3.61642	4.6368	0.00501019	0.0427793	-2.53334	Sgpl1	sphingosine phosphate lyase 1 (Sgpl1)	NM_009163	227116286	8	3037	CAUCCCUU	3030	3UTR	0.034	1		Cxcl9	chemokine (C-X-C motif) ligand 9 (Cxcl9)	NM_008599	162287427
mmu-miR-188-5p	2.70078	3.61642	4.6368	0.00501019	0.0427793	-2.53334	RP23-29D6.1	selection and upkeep of intraepithelial T cells 3 (Skint3)	NM_177578	146198750	8	2789	AUCCCUUG	2782	3UTR	0.0339	2		Cxcr3	chemokine (C-X-C motif) receptor 3 (Cxcr3)	NM_009910	118129823
mmu-miR-188-5p	2.70078	3.61642	4.6368	0.00501019	0.0427793	-2.53334	Ctse	cathepsin E (Ctse)	NM_007799	166235885	7	1567	CAUCCCU	1561	3UTR	0.0337	1		Cxx1b	CAAX box 1B (Cxx1b)	NM_001018063	65787324
mmu-miR-188-5p	2.70078	3.61642	4.6368	0.00501019	0.0427793	-2.53334	Dppa4	developmental pluripotency associated 4 (Dppa4)	NM_028610	63079712	7	1116	AUCCCUU	1110	3UTR	0.0336	2		Cyb561d1	cytochrome b-561 domain containing 1 (Cyb561d1)	NM_001081320	139949164
mmu-miR-188-5p	2.70078	3.61642	4.6368	0.00501019	0.0427793	-2.53334	Mn1	meningioma 1 (Mn1)	NM_001081235	124486984	8	5481	CAUCCCUU	5474	3UTR	0.0335	1		Cyb5r3	cytochrome b5 reductase 3 (Cyb5r3)	NM_029787	31981358
mmu-miR-188-5p	2.70078	3.61642	4.6368	0.00501019	0.0427793	-2.53334	Notch4	notch 4 (Notch4)	NM_010929	114326468	7	6485	CAUCCCU	6479	3UTR	0.0335	1		Cycs	cytochrome c, somatic (Cycs)	NM_007808	142370730
mmu-miR-188-5p	2.70078	3.61642	4.6368	0.00501019	0.0427793	-2.53334	Tmem184a	transmembrane protein 184a (Tmem184a)	NM_144914	238859630	7	1771	CAUCCCU	1765	3UTR	0.0335	1		Cyfip1	cytoplasmic FMR1 interacting protein 1 (Cyfip1)	NM_011370	258547113
mmu-miR-188-5p	2.70078	3.61642	4.6368	0.00501019	0.0427793	-2.53334	Nagpa	N-acetylglucosamine-1-phosphodiester alpha-N-acetylglucosaminidase (Nagpa)	NM_013796	241982767	7	1912	CAUCCCU	1906	3UTR	0.0333	1		Cyld	cylindromatosis (turban tumor syndrome) (Cyld)	NM_173369	443287661
mmu-miR-188-5p	2.70078	3.61642	4.6368	0.00501019	0.0427793	-2.53334	Nagpa	N-acetylglucosamine-1-phosphodiester alpha-N-acetylglucosaminidase (Nagpa)	NM_013796	241982767	7	2047	AUCCCUU	2041	3UTR	0.0333	2		Cyp21a1	cytochrome P450, family 21, subfamily a, polypeptide 1 (Cyp21a1)	NM_009995	160948603
mmu-miR-188-5p	2.70078	3.61642	4.6368	0.00501019	0.0427793	-2.53334	C330016O10Rik	NEDD4 binding protein 3 (N4bp3)	NM_145974	56119137	7	2151	CAUCCCU	2145	3UTR	0.0332	1		Cyp26b1	cytochrome P450, family 26, subfamily b, polypeptide 1 (Cyp26b1)	NM_175475	295148237
mmu-miR-188-5p	2.70078	3.61642	4.6368	0.00501019	0.0427793	-2.53334	Dhrs13	dehydrogenase/reductase (SDR family) member 13 (Dhrs13)	NM_183286	117647266	7	1384	CAUCCCU	1378	3UTR	0.0332	1		Cyp2c39	cytochrome P450, family 2, subfamily c, polypeptide 39 (Cyp2c39)	NM_010003	242332604
mmu-miR-188-5p	2.70078	3.61642	4.6368	0.00501019	0.0427793	-2.53334	Ggcx	gamma-glutamyl carboxylase (Ggcx)	NM_019802	449310799	7	2354	CAUCCCU	2348	3UTR	0.0331	1		Cyp2c54	cytochrome P450, family 2, subfamily c, polypeptide 54 (Cyp2c54)	NM_206537	190684684
mmu-miR-188-5p	2.70078	3.61642	4.6368	0.00501019	0.0427793	-2.53334	Ppp1r12c	protein phosphatase 1, regulatory (inhibitor) subunit 12C (Ppp1r12c)	NM_029834	142384961	7	2879	CAUCCCU	2873	3UTR	0.0331	1		Cyp2c70	cytochrome P450, family 2, subfamily c, polypeptide 70 (Cyp2c70)	NM_145499	268607641
mmu-miR-188-5p	2.70078	3.61642	4.6368	0.00501019	0.0427793	-2.53334	Ppp1r12c	protein phosphatase 1, regulatory (inhibitor) subunit 12C (Ppp1r12c)	NM_029834	142384961	7	2803	CAUCCCU	2797	3UTR	0.0331	1		Cyp2j6	cytochrome P450, family 2, subfamily j, polypeptide 6 (Cyp2j6)	NM_010008	160948617
mmu-miR-188-5p	2.70078	3.61642	4.6368	0.00501019	0.0427793	-2.53334	Rdh16	retinol dehydrogenase 16 (Rdh16)	NM_009040	160333706	8	1198	AUCCCUUG	1191	3UTR	0.0331	2		Cyp46a1	cytochrome P450, family 46, subfamily a, polypeptide 1 (Cyp46a1)	NM_010010	6753589
mmu-miR-188-5p	2.70078	3.61642	4.6368	0.00501019	0.0427793	-2.53334	Wdr3	WD repeat domain 3 (Wdr3)	NM_175552	256773239	7	3292	AUCCCUU	3286	3UTR	0.0331	2		Cyp4b1	cytochrome P450, family 4, subfamily b, polypeptide 1 (Cyp4b1)	NM_007823	118131158
mmu-miR-188-5p	2.70078	3.61642	4.6368	0.00501019	0.0427793	-2.53334	Rab39	RAB39, member RAS oncogene family (Rab39)	NM_175562	133891651	8	1650	CAUCCCUU	1643	3UTR	0.033	1		Cyp4f13	cytochrome P450, family 4, subfamily f, polypeptide 13 (Cyp4f13)	NM_130882	20373154
mmu-miR-188-5p	2.70078	3.61642	4.6368	0.00501019	0.0427793	-2.53334	Ctnnbip1	catenin beta interacting protein 1 (Ctnnbip1)	NM_023465	213513125	8	685	CAUCCCUU	678	3UTR	0.0329	1		Cyp4f14	cytochrome P450, family 4, subfamily f, polypeptide 14 (Cyp4f14)	NM_022434	324120983
mmu-miR-188-5p	2.70078	3.61642	4.6368	0.00501019	0.0427793	-2.53334	Dbp	D site albumin promoter binding protein (Dbp)	NM_016974	253795448	7	1805	AUCCCUU	1799	3UTR	0.0329	2		Cyp4f15	cytochrome P450, family 4, subfamily f, polypeptide 15 (Cyp4f15)	NM_134127	20373164
mmu-miR-188-5p	2.70078	3.61642	4.6368	0.00501019	0.0427793	-2.53334	Dsg2	desmoglein 2 (Dsg2)	NM_007883	161016842	8	4661	AUCCCUUG	4654	3UTR	0.0329	2		Cyp7a1	cytochrome P450, family 7, subfamily a, polypeptide 1 (Cyp7a1)	NM_007824	31542444
mmu-miR-188-5p	2.70078	3.61642	4.6368	0.00501019	0.0427793	-2.53334	Ccl7	chemokine (C-C motif) ligand 7 (Ccl7)	NM_013654	226958664	7	475	AUCCCUU	469	3UTR	0.0328	2		Cyp8b1	cytochrome P450, family 8, subfamily b, polypeptide 1 (Cyp8b1)	NM_010012	227497651
mmu-miR-188-5p	2.70078	3.61642	4.6368	0.00501019	0.0427793	-2.53334	Gstcd	glutathione S-transferase, C-terminal domain containing (Gstcd)	NM_026231	55926230	7	2237	CAUCCCU	2231	3UTR	0.0328	1		Cyr61	cysteine rich protein 61 (Cyr61)	NM_010516	239937453
mmu-miR-188-5p	2.70078	3.61642	4.6368	0.00501019	0.0427793	-2.53334	Usp5	ubiquitin specific peptidase 5 (isopeptidase T) (Usp5)	NM_013700	7305618	7	2827	CAUCCCU	2821	3UTR	0.0328	1		Cytl1	cytokine-like 1 (Cytl1)	NM_001081106	124487394
mmu-miR-188-5p	2.70078	3.61642	4.6368	0.00501019	0.0427793	-2.53334	Usp5	ubiquitin specific peptidase 5 (isopeptidase T) (Usp5)	NM_013700	7305618	7	2699	CAUCCCU	2693	3UTR	0.0328	1		D030016E14Rik	trafficking protein particle complex 11 (Trappc11)	NM_177240	62241018
mmu-miR-188-5p	2.70078	3.61642	4.6368	0.00501019	0.0427793	-2.53334	Mizf	histone H4 transcription factor (Hinfp)	NM_172162	281306719	7	1874	CAUCCCU	1868	3UTR	0.0327	1		D0H4S114	neuronal regeneration related protein (Nrep)	NM_053078	158517807
mmu-miR-188-5p	2.70078	3.61642	4.6368	0.00501019	0.0427793	-2.53334	Sap30l	SAP30-like (Sap30l)	NM_001081168	124487192	7	1460	CAUCCCU	1454	3UTR	0.0327	1		D10Ertd641e	anaphase promoting complex subunit 16 (Anapc16)	NM_025514	118130312
mmu-miR-188-5p	2.70078	3.61642	4.6368	0.00501019	0.0427793	-2.53334	Arl8b	ADP-ribosylation factor-like 8B (Arl8b)	NM_026011	115292448	8	1517	CAUCCCUU	1510	3UTR	0.0326	1		D10Wsu102e	DNA segment, Chr 10, Wayne State University 102, expressed (D10Wsu102e)	NM_026579	240255592
mmu-miR-188-5p	2.70078	3.61642	4.6368	0.00501019	0.0427793	-2.53334	Agtrl1	apelin receptor (Aplnr)	NM_011784	213385259	8	1582	CAUCCCUU	1575	3UTR	0.0325	1		D11Bwg0517e	RNA binding protein, fox-1 homolog (C. elegans) 3 (Rbfox3)	NM_001024931	85677498
mmu-miR-188-5p	2.70078	3.61642	4.6368	0.00501019	0.0427793	-2.53334	Homer2	homer homolog 2 (Drosophila) (Homer2)	NM_011983	255760040	7	1371	CAUCCCU	1365	3UTR	0.0325	1		D130059P03Rik	ubinuclein 2 (Ubn2)	NM_177185	158749566
mmu-miR-188-5p	2.70078	3.61642	4.6368	0.00501019	0.0427793	-2.53334	Slc4a3	solute carrier family 4 (anion exchanger)	NM_009208	165377245	7	3995	CAUCCCU	3989	3UTR	0.0325	1		D14Ertd436e	autophagy related 14 (Atg14)	NM_172599	225543142
mmu-miR-188-5p	2.70078	3.61642	4.6368	0.00501019	0.0427793	-2.53334	Zbtb37	zinc finger and BTB domain containing 37 (Zbtb37)	NM_173424	146198631	8	3039	AUCCCUUG	3032	3UTR	0.0325	2		D15Ertd621e	DNA segment, Chr 15, ERATO Doi 621, expressed (D15Ertd621e)	NM_145959	283945602
mmu-miR-188-5p	2.70078	3.61642	4.6368	0.00501019	0.0427793	-2.53334	Acot3	acyl-CoA thioesterase 3 (Acot3)	NM_134246	118129952	7	2490	AUCCCUU	2484	3UTR	0.0324	2		D15Wsu169e	Rho GTPase activating protein 39 (Arhgap39)	NM_198420	269973894
mmu-miR-188-5p	2.70078	3.61642	4.6368	0.00501019	0.0427793	-2.53334	Birc2	baculoviral IAP repeat-containing 2 (Birc2)	NM_007465	160333365	7	3088	CAUCCCU	3082	3UTR	0.0324	1		D16Ertd472e	DNA segment, Chr 16, ERATO Doi 472, expressed (D16Ertd472e)	NM_025967	356995928
mmu-miR-188-5p	2.70078	3.61642	4.6368	0.00501019	0.0427793	-2.53334	Kcnt1	potassium channel, subfamily T, member 1 (Kcnt1)	NM_175462	697272030	8	5143	CAUCCCUU	5136	3UTR	0.0324	1		D16H22S680E	transport and golgi organization 2 (Tango2)	NM_138583	255918142
mmu-miR-188-5p	2.70078	3.61642	4.6368	0.00501019	0.0427793	-2.53334	6430548M08Rik	RIKEN cDNA 6430548M08 gene (6430548M08Rik)	NM_172286	255069799	8	2431	AUCCCUUG	2424	3UTR	0.0323	2		D1Ertd53e	family with sequence similarity 126, member B (Fam126b)	NM_172513	169790855
mmu-miR-188-5p	2.70078	3.61642	4.6368	0.00501019	0.0427793	-2.53334	Cdk10	cyclin-dependent kinase 10 (Cdk10)	NM_194446	237858587	7	1272	CAUCCCU	1266	3UTR	0.0323	1		D2hgdh	D-2-hydroxyglutarate dehydrogenase (D2hgdh)	NM_178882	170014722
mmu-miR-188-5p	2.70078	3.61642	4.6368	0.00501019	0.0427793	-2.53334	Rxfp3	relaxin family peptide receptor 3 (Rxfp3)	NM_178717	142386187	8	2204	CAUCCCUU	2197	3UTR	0.0323	1		D2Wsu81e	DNA segment, Chr 2, Wayne State University 81, expressed (D2Wsu81e)	NM_172660	305682576
mmu-miR-188-5p	2.70078	3.61642	4.6368	0.00501019	0.0427793	-2.53334	Galnt11	UDP-N-acetyl-alpha-D-galactosamine:polypeptide N-acetylgalactosaminyltransferase 11 (Galnt11)	NM_144908	146149201	7	2173	AUCCCUU	2167	3UTR	0.0322	2		D330012F22Rik	GDP-D-glucose phosphorylase 1 (Gdpgp1)	NM_178752	123702128
mmu-miR-188-5p	2.70078	3.61642	4.6368	0.00501019	0.0427793	-2.53334	Hoxb1	homeobox B1 (Hoxb1)	NM_008266	226693399	7	1144	CAUCCCU	1138	3UTR	0.0322	1		D430028G21Rik	mitochondrial antiviral signaling protein (Mavs)	NM_144888	329755282
mmu-miR-188-5p	2.70078	3.61642	4.6368	0.00501019	0.0427793	-2.53334	Mvd	mevalonate (diphospho) decarboxylase (Mvd)	NM_138656	256985113	7	1483	CAUCCCU	1477	3UTR	0.0322	1		D630023F18Rik	RIKEN cDNA D630023F18 gene (D630023F18Rik)	NM_175293	551893615
mmu-miR-188-5p	2.70078	3.61642	4.6368	0.00501019	0.0427793	-2.53334	Vav2	vav 2 oncogene (Vav2)	NM_009500	6678554	7	3088	CAUCCCU	3082	3UTR	0.0322	1		D630039A03Rik	RIKEN cDNA D630039A03 gene (D630039A03Rik)	NM_178727	65301479
mmu-miR-188-5p	2.70078	3.61642	4.6368	0.00501019	0.0427793	-2.53334	Arhgap25	Rho GTPase activating protein 25 (Arhgap25)	NM_001037727	557636711	7	2404	CAUCCCU	2398	3UTR	0.0321	1		D630042P16Rik	ssu-2 homolog (C. elegans) (Ssu2)	NM_175525	141802588
mmu-miR-188-5p	2.70078	3.61642	4.6368	0.00501019	0.0427793	-2.53334	Arhgef7	Rho guanine nucleotide exchange factor (GEF7) (Arhgef7)	NM_017402	165377080	8	4229	CAUCCCUU	4222	3UTR	0.0321	1		D730039F16Rik	cutA divalent cation tolerance homolog-like (Cutal)	NM_030021	142380367
mmu-miR-188-5p	2.70078	3.61642	4.6368	0.00501019	0.0427793	-2.53334	Gpr45	G protein-coupled receptor 45 (Gpr45)	NM_053107	237757313	8	1987	CAUCCCUU	1980	3UTR	0.032	1		D930001I22Rik	fat storage-inducing transmembrane protein 2 (Fitm2)	NM_173397	148539927
mmu-miR-188-5p	2.70078	3.61642	4.6368	0.00501019	0.0427793	-2.53334	BC022224	dehydrogenase/reductase (SDR family) member 11 (Dhrs11)	NM_177564	262263396	7	1147	AUCCCUU	1141	3UTR	0.0319	2		D930005D10Rik	Ras association and DIL domains (Radil)	NM_178702	575771801
mmu-miR-188-5p	2.70078	3.61642	4.6368	0.00501019	0.0427793	-2.53334	BC022224	dehydrogenase/reductase (SDR family) member 11 (Dhrs11)	NM_177564	262263396	7	990	AUCCCUU	984	3UTR	0.0319	2		D930028F11Rik	neurexophilin and PC-esterase domain family, member 4 (Nxpe4)	NM_172921	328751674
mmu-miR-188-5p	2.70078	3.61642	4.6368	0.00501019	0.0427793	-2.53334	B4galt3	UDP-Gal:betaGlcNAc beta 1,4-galactosyltransferase, polypeptide 3 (B4galt3)	NM_020579	224809361	7	1565	CAUCCCU	1559	3UTR	0.0318	1		D9Ertd280e	extended synaptotagmin-like protein 3 (Esyt3)	NM_177775	119433660
mmu-miR-188-5p	2.70078	3.61642	4.6368	0.00501019	0.0427793	-2.53334	Cd84	CD84 antigen (Cd84)	NM_013489	323423083	8	1169	AUCCCUUG	1162	3UTR	0.0318	2		Daam1	dishevelled associated activator of morphogenesis 1 (Daam1)	NM_026102	557129005
mmu-miR-188-5p	2.70078	3.61642	4.6368	0.00501019	0.0427793	-2.53334	Ilf3	interleukin enhancer binding factor 3 (Ilf3)	NM_001042707	472339102	7	3229	AUCCCUU	3223	3UTR	0.0318	2		Dab1	disabled 1 (Dab1)	NM_177259	554790252
mmu-miR-188-5p	2.70078	3.61642	4.6368	0.00501019	0.0427793	-2.53334	2610008E11Rik	RIKEN cDNA 2610008E11 gene (2610008E11Rik)	NM_001004362	291621712	8	2209	CAUCCCUU	2202	3UTR	0.0317	1		Dab2	disabled 2, mitogen-responsive phosphoprotein (Dab2)	NM_001008702	156151404
mmu-miR-188-5p	2.70078	3.61642	4.6368	0.00501019	0.0427793	-2.53334	Ccdc132	coiled-coil domain containing 132 (Ccdc132)	NM_024260	268370056	7	3317	AUCCCUU	3311	3UTR	0.0317	2		Dact3	dapper homolog 3, antagonist of beta-catenin (xenopus) (Dact3)	NM_001081655	126090619
mmu-miR-188-5p	2.70078	3.61642	4.6368	0.00501019	0.0427793	-2.53334	Kctd21	potassium channel tetramerisation domain containing 21 (Kctd21)	NM_001039039	148352322	8	1787	AUCCCUUG	1780	3UTR	0.0317	2		Dagla	diacylglycerol lipase, alpha (Dagla)	NM_198114	154091035
mmu-miR-188-5p	2.70078	3.61642	4.6368	0.00501019	0.0427793	-2.53334	Phc3	polyhomeotic-like 3 (Drosophila) (Phc3)	NM_153421	260099708	7	3530	AUCCCUU	3524	3UTR	0.0317	2		Dand5	DAN domain family, member 5 (Dand5)	NM_201227	274318370
mmu-miR-188-5p	2.70078	3.61642	4.6368	0.00501019	0.0427793	-2.53334	Ugt3a2	UDP glycosyltransferases 3 family, polypeptide A2 (Ugt3a2)	NM_144845	142365155	7	1705	CAUCCCU	1699	3UTR	0.0317	1		Dars	aspartyl-tRNA synthetase (Dars)	NM_145507	210147401
mmu-miR-188-5p	2.70078	3.61642	4.6368	0.00501019	0.0427793	-2.53334	Krba1	KRAB-A domain containing 1 (Krba1)	NM_133922	256985193	7	3506	CAUCCCU	3500	3UTR	0.0316	1		Dazap1	DAZ associated protein 1 (Dazap1)	NM_133188	169790817
mmu-miR-188-5p	2.70078	3.61642	4.6368	0.00501019	0.0427793	-2.53334	Brsk1	BR serine/threonine kinase 1 (Brsk1)	NM_001003920	270483780	7	2757	CAUCCCU	2751	3UTR	0.0315	1		Dazap2	DAZ associated protein 2 (Dazap2)	NM_011873	31982752
mmu-miR-188-5p	2.70078	3.61642	4.6368	0.00501019	0.0427793	-2.53334	Mef2d	myocyte enhancer factor 2D (Mef2d)	NM_133665	145301627	7	2150	CAUCCCU	2144	3UTR	0.0315	1		Dbc1	bone morphogenic protein/retinoic acid inducible neural specific 1 (Brinp1)	NM_019967	85677500
mmu-miR-188-5p	2.70078	3.61642	4.6368	0.00501019	0.0427793	-2.53334	Myo1d	myosin ID (Myo1d)	NM_177390	118026910	8	3664	CAUCCCUU	3657	3UTR	0.0315	1		Dbh	dopamine beta hydroxylase (Dbh)	NM_138942	110815860
mmu-miR-188-5p	2.70078	3.61642	4.6368	0.00501019	0.0427793	-2.53334	Pdk4	pyruvate dehydrogenase kinase, isoenzyme 4 (Pdk4)	NM_013743	118130875	8	2568	AUCCCUUG	2561	3UTR	0.0315	2		Dbndd2	dysbindin (dystrobrevin binding protein 1) domain containing 2 (Dbndd2)	NM_001048227	115299763
mmu-miR-188-5p	2.70078	3.61642	4.6368	0.00501019	0.0427793	-2.53334	Tnk1	tyrosine kinase, non-receptor, 1 (Tnk1)	NM_031880	264681504	7	2188	CAUCCCU	2182	3UTR	0.0315	1		Dbp	D site albumin promoter binding protein (Dbp)	NM_016974	253795448
mmu-miR-188-5p	2.70078	3.61642	4.6368	0.00501019	0.0427793	-2.53334	Edar	ectodysplasin-A receptor (Edar)	NM_010100	164664525	8	1895	CAUCCCUU	1888	3UTR	0.0314	1		Dbpht2	DNA binding protein with his-thr domain (Dbpht2)	NM_198866	115311549
mmu-miR-188-5p	2.70078	3.61642	4.6368	0.00501019	0.0427793	-2.53334	Mapkbp1	mitogen-activated protein kinase binding protein 1 (Mapkbp1)	NM_011941	213385288	8	6006	CAUCCCUU	5999	3UTR	0.0314	1		Dbt	dihydrolipoamide branched chain transacylase E2 (Dbt)	NM_010022	170172519
mmu-miR-188-5p	2.70078	3.61642	4.6368	0.00501019	0.0427793	-2.53334	Mapkbp1	mitogen-activated protein kinase binding protein 1 (Mapkbp1)	NM_011941	213385288	8	5981	CAUCCCUU	5974	3UTR	0.0314	1		Dbx1	developing brain homeobox 1 (Dbx1)	NM_001005232	52421337
mmu-miR-188-5p	2.70078	3.61642	4.6368	0.00501019	0.0427793	-2.53334	Cdadc1	cytidine and dCMP deaminase domain containing 1 (Cdadc1)	NM_027986	270483866	7	1900	AUCCCUU	1894	3UTR	0.0313	2		Dcakd	dephospho-CoA kinase domain containing (Dcakd)	NM_026551	142370255
mmu-miR-188-5p	2.70078	3.61642	4.6368	0.00501019	0.0427793	-2.53334	Ggt5	gamma-glutamyltransferase 5 (Ggt5)	NM_011820	146134403	8	3725	CAUCCCUU	3718	3UTR	0.0313	1		Dcbld2	discoidin, CUB and LCCL domain containing 2 (Dcbld2)	NM_028523	84579946
mmu-miR-188-5p	2.70078	3.61642	4.6368	0.00501019	0.0427793	-2.53334	Ggt5	gamma-glutamyltransferase 5 (Ggt5)	NM_011820	146134403	8	3232	AUCCCUUG	3225	3UTR	0.0313	2		Dclk1	doublecortin-like kinase 1 (Dclk1)	NM_019978	161353457
mmu-miR-188-5p	2.70078	3.61642	4.6368	0.00501019	0.0427793	-2.53334	Lrrc10	leucine rich repeat containing 10 (Lrrc10)	NM_146242	113930741	7	979	AUCCCUU	973	3UTR	0.0313	2		Dclre1c	DNA cross-link repair 1C, PSO2 homolog (S. cerevisiae) (Dclre1c)	NM_175683	158966678
mmu-miR-188-5p	2.70078	3.61642	4.6368	0.00501019	0.0427793	-2.53334	Prep	prolyl endopeptidase (Prep)	NM_011156	31560555	7	2580	AUCCCUU	2574	3UTR	0.0311	2		Dcps	decapping enzyme, scavenger (Dcps)	NM_027030	142352443
mmu-miR-188-5p	2.70078	3.61642	4.6368	0.00501019	0.0427793	-2.53334	2810021B07Rik	M-phase specific PLK1 intereacting protein (Mplkip)	NM_025479	158508638	8	2111	CAUCCCUU	2104	3UTR	0.031	1		Dcst1	DC-STAMP domain containing 1 (Dcst1)	NM_029974	116812882
mmu-miR-188-5p	2.70078	3.61642	4.6368	0.00501019	0.0427793	-2.53334	Arl6	ADP-ribosylation factor-like 6 (Arl6)	NM_019665	188528680	7	1431	AUCCCUU	1425	3UTR	0.0309	2		Dctn2	dynactin 2 (Dctn2)	NM_027151	299522834
mmu-miR-188-5p	2.70078	3.61642	4.6368	0.00501019	0.0427793	-2.53334	Ifit2	interferon-induced protein with tetratricopeptide repeats 2 (Ifit2)	NM_008332	162461505	8	2660	CAUCCCUU	2653	3UTR	0.0309	1		Dctn4	dynactin 4 (Dctn4)	NM_026302	118131213
mmu-miR-188-5p	2.70078	3.61642	4.6368	0.00501019	0.0427793	-2.53334	Ifit2	interferon-induced protein with tetratricopeptide repeats 2 (Ifit2)	NM_008332	162461505	8	2439	CAUCCCUU	2432	3UTR	0.0309	1		Dcun1d2	DCN1, defective in cullin neddylation 1, domain containing 2 (S. cerevisiae) (Dcun1d2)	NM_001042650	111162656
mmu-miR-188-5p	2.70078	3.61642	4.6368	0.00501019	0.0427793	-2.53334	Ifit2	interferon-induced protein with tetratricopeptide repeats 2 (Ifit2)	NM_008332	162461505	8	3455	AUCCCUUG	3448	3UTR	0.0309	2		Dcun1d3	DCN1, defective in cullin neddylation 1, domain containing 3 (S. cerevisiae) (Dcun1d3)	NM_173408	254911086
mmu-miR-188-5p	2.70078	3.61642	4.6368	0.00501019	0.0427793	-2.53334	Il10rb	interleukin 10 receptor, beta (Il10rb)	NM_008349	226693323	7	1357	CAUCCCU	1351	3UTR	0.0309	1		Dcun1d4	DCN1, defective in cullin neddylation 1, domain containing 4 (S. cerevisiae) (Dcun1d4)	NM_178896	300192984
mmu-miR-188-5p	2.70078	3.61642	4.6368	0.00501019	0.0427793	-2.53334	Cd97	CD97 antigen (Cd97)	NM_011925	251823834	7	2593	AUCCCUU	2587	3UTR	0.0308	2		Ddb1	damage specific DNA binding protein 1 (Ddb1)	NM_015735	7657010
mmu-miR-188-5p	2.70078	3.61642	4.6368	0.00501019	0.0427793	-2.53334	Kng1	kininogen 1 (Kng1)	NM_023125	156231019	7	1728	CAUCCCU	1722	3UTR	0.0305	1		Ddefl1	ArfGAP with SH3 domain, ankyrin repeat and PH domain 3 (Asap3)	NM_001008232	256542298
mmu-miR-188-5p	2.70078	3.61642	4.6368	0.00501019	0.0427793	-2.53334	Top2a	topoisomerase (DNA) II alpha (Top2a)	NM_011623	153945748	7	4735	CAUCCCU	4729	3UTR	0.0305	1		Ddhd1	DDHD domain containing 1 (Ddhd1)	NM_001042719	548923723
mmu-miR-188-5p	2.70078	3.61642	4.6368	0.00501019	0.0427793	-2.53334	Vps33a	vacuolar protein sorting 33A (yeast) (Vps33a)	NM_029929	254588040	8	1995	CAUCCCUU	1988	3UTR	0.0305	1		Ddi1	DDI1, DNA-damage inducible 1, homolog 1 (S. cerevisiae) (Ddi1)	NM_027942	146262011
mmu-miR-188-5p	2.70078	3.61642	4.6368	0.00501019	0.0427793	-2.53334	Acat1	acetyl-Coenzyme A acetyltransferase 1 (Acat1)	NM_144784	118130035	8	3335	CAUCCCUU	3328	3UTR	0.0304	1		Ddi2	DNA-damage inducible protein 2 (Ddi2)	NM_001017966	77404398
mmu-miR-188-5p	2.70078	3.61642	4.6368	0.00501019	0.0427793	-2.53334	Hcfc1r1	host cell factor C1 regulator 1 (XPO1-dependent) (Hcfc1r1)	NM_181821	32451499	7	807	AUCCCUU	801	3UTR	0.0304	2		Ddit3	DNA-damage inducible transcript 3 (Ddit3)	NM_007837	589269229
mmu-miR-188-5p	2.70078	3.61642	4.6368	0.00501019	0.0427793	-2.53334	4631426J05Rik	carbohydrate (N-acetylgalactosamine 4-sulfate 6-O) sulfotransferase 15 (Chst15)	NM_029935	158508649	8	3521	AUCCCUUG	3514	3UTR	0.0303	2		Ddit4l	DNA-damage-inducible transcript 4-like (Ddit4l)	NM_030143	240120063
mmu-miR-188-5p	2.70078	3.61642	4.6368	0.00501019	0.0427793	-2.53334	Ak3	adenylate kinase 3 (Ak3)	NM_021299	23956103	8	1183	CAUCCCUU	1176	3UTR	0.0303	1		Ddo	D-aspartate oxidase (Ddo)	NM_027442	164519072
mmu-miR-188-5p	2.70078	3.61642	4.6368	0.00501019	0.0427793	-2.53334	Piga	phosphatidylinositol glycan anchor biosynthesis, class A (Piga)	NM_011081	126273665	8	2065	AUCCCUUG	2058	3UTR	0.0303	2		Ddost	dolichyl-di-phosphooligosaccharide-protein glycotransferase (Ddost)	NM_007838	46195797
mmu-miR-188-5p	2.70078	3.61642	4.6368	0.00501019	0.0427793	-2.53334	Itga1	integrin alpha 1 (Itga1)	NM_001033228	153791388	8	4307	CAUCCCUU	4300	3UTR	0.0302	1		Ddx11	DEAD/H (Asp-Glu-Ala-Asp/His) box helicase 11 (Ddx11)	NM_001003919	51491861
mmu-miR-188-5p	2.70078	3.61642	4.6368	0.00501019	0.0427793	-2.53334	Psmd7	proteasome (prosome, macropain) 26S subunit, non-ATPase, 7 (Psmd7)	NM_010817	291045427	7	1372	AUCCCUU	1366	3UTR	0.0302	2		Ddx17	DEAD (Asp-Glu-Ala-Asp) box polypeptide 17 (Ddx17)	NM_199080	93587676
mmu-miR-188-5p	2.70078	3.61642	4.6368	0.00501019	0.0427793	-2.53334	Rnf185	ring finger protein 185 (Rnf185)	NM_145355	594190927	8	1192	CAUCCCUU	1185	3UTR	0.0302	1		Ddx19a	DEAD (Asp-Glu-Ala-Asp) box polypeptide 19a (Ddx19a)	NM_007916	170932535
mmu-miR-188-5p	2.70078	3.61642	4.6368	0.00501019	0.0427793	-2.53334	Suz12	suppressor of zeste 12 homolog (Drosophila) (Suz12)	NM_199196	253314521	8	2823	CAUCCCUU	2816	3UTR	0.0302	1		Ddx31	DEAD/H (Asp-Glu-Ala-Asp/His) box polypeptide 31 (Ddx31)	NM_001033294	254675192
mmu-miR-188-5p	2.70078	3.61642	4.6368	0.00501019	0.0427793	-2.53334	Hoxc8	homeobox C8 (Hoxc8)	NM_010466	237649072	7	1398	AUCCCUU	1392	3UTR	0.0301	2		Ddx3x	DEAD/H (Asp-Glu-Ala-Asp/His) box polypeptide 3, X-linked (Ddx3x)	NM_010028	164607180
mmu-miR-188-5p	2.70078	3.61642	4.6368	0.00501019	0.0427793	-2.53334	Cenpf	centromere protein F (Cenpf)	NM_001081363	189458890	8	10357	CAUCCCUU	10350	3UTR	0.03	1		Ddx47	DEAD (Asp-Glu-Ala-Asp) box polypeptide 47 (Ddx47)	NM_026360	299829280
mmu-miR-188-5p	2.70078	3.61642	4.6368	0.00501019	0.0427793	-2.53334	Fads1	fatty acid desaturase 1 (Fads1)	NM_146094	255982973	8	2739	CAUCCCUU	2732	3UTR	0.0298	1		Ddx49	DEAD (Asp-Glu-Ala-Asp) box polypeptide 49 (Ddx49)	NM_001024922	67972434
mmu-miR-188-5p	2.70078	3.61642	4.6368	0.00501019	0.0427793	-2.53334	Hoxd8	homeobox D8 (Hoxd8)	NM_008276	595582341	7	1097	AUCCCUU	1091	3UTR	0.0298	2		Ddx50	DEAD (Asp-Glu-Ala-Asp) box polypeptide 50 (Ddx50)	NM_053183	142351139
mmu-miR-188-5p	2.70078	3.61642	4.6368	0.00501019	0.0427793	-2.53334	Lysmd4	LysM, putative peptidoglycan-binding, domain containing 4 (Lysmd4)	NM_175215	300796348	8	2674	AUCCCUUG	2667	3UTR	0.0298	2		Ddx6	DEAD (Asp-Glu-Ala-Asp) box polypeptide 6 (Ddx6)	NM_007841	161016791
mmu-miR-188-5p	2.70078	3.61642	4.6368	0.00501019	0.0427793	-2.53334	Lyrm1	LYR motif containing 1 (Lyrm1)	NM_029610	553727153	7	1101	AUCCCUU	1095	3UTR	0.0296	2		Dedd	death effector domain-containing (Dedd)	NM_011615	190684680
mmu-miR-188-5p	2.70078	3.61642	4.6368	0.00501019	0.0427793	-2.53334	Plekha6	pleckstrin homology domain containing, family A member 6 (Plekha6)	NM_182930	237681202	8	6052	AUCCCUUG	6045	3UTR	0.0296	2		Def8	differentially expressed in FDCP 8 (Def8)	NM_054046	359324542
mmu-miR-188-5p	2.70078	3.61642	4.6368	0.00501019	0.0427793	-2.53334	Eif2c2	argonaute RISC catalytic subunit 2 (Ago2)	NM_153178	258613869	8	3231	CAUCCCUU	3224	3UTR	0.0295	1		Defb25	defensin beta 25 (Defb25)	NM_001039122	84993773
mmu-miR-188-5p	2.70078	3.61642	4.6368	0.00501019	0.0427793	-2.53334	Mafb	v-maf musculoaponeurotic fibrosarcoma oncogene family, protein B (avian) (Mafb)	NM_010658	227116278	8	2115	CAUCCCUU	2108	3UTR	0.0295	1		Degs1	degenerative spermatocyte homolog 1 (Drosophila) (Degs1)	NM_007853	145966905
mmu-miR-188-5p	2.70078	3.61642	4.6368	0.00501019	0.0427793	-2.53334	Armcx1	armadillo repeat containing, X-linked 1 (Armcx1)	NM_030066	261824003	7	2017	AUCCCUU	2011	3UTR	0.0293	2		Degs2	degenerative spermatocyte homolog 2 (Drosophila)	NM_027299	283483984
mmu-miR-188-5p	2.70078	3.61642	4.6368	0.00501019	0.0427793	-2.53334	Calb1	calbindin 1 (Calb1)	NM_009788	145864481	8	1383	CAUCCCUU	1376	3UTR	0.0293	1		Dennd1a	DENN/MADD domain containing 1A (Dennd1a)	NM_146122	254675211
mmu-miR-188-5p	2.70078	3.61642	4.6368	0.00501019	0.0427793	-2.53334	5730557B15Rik	ankyrin repeat domain 33B (Ankrd33b)	NM_027496	256600245	7	1714	CAUCCCU	1708	3UTR	0.0292	1		Dennd1c	DENN/MADD domain containing 1C (Dennd1c)	NM_153551	24025655
mmu-miR-188-5p	2.70078	3.61642	4.6368	0.00501019	0.0427793	-2.53334	Aldh3b1	aldehyde dehydrogenase 3 family, member B1 (Aldh3b1)	NM_026316	34328287	7	1607	AUCCCUU	1601	3UTR	0.0292	2		Depdc5	DEP domain containing 5 (Depdc5)	NM_001025426	282847361
mmu-miR-188-5p	2.70078	3.61642	4.6368	0.00501019	0.0427793	-2.53334	D14Ertd436e	autophagy related 14 (Atg14)	NM_172599	225543142	8	2321	AUCCCUUG	2314	3UTR	0.0292	2		Depdc6	DEP domain containing MTOR-interacting protein (Deptor)	NM_145470	549806803
mmu-miR-188-5p	2.70078	3.61642	4.6368	0.00501019	0.0427793	-2.53334	Wnt11	wingless-type MMTV integration site family, member 11 (Wnt11)	NM_009519	254750613	7	1614	CAUCCCU	1608	3UTR	0.0292	1		Dera	2-deoxyribose-5-phosphate aldolase homolog (C. elegans) (Dera)	NM_172733	27777676
mmu-miR-188-5p	2.70078	3.61642	4.6368	0.00501019	0.0427793	-2.53334	Celsr1	cadherin, EGF LAG seven-pass G-type receptor 1 (flamingo homolog, Drosophila) (Celsr1)	NM_009886	115648152	8	10338	AUCCCUUG	10331	3UTR	0.0291	2		Derl1	Der1-like domain family, member 1 (Derl1)	NM_024207	146135081
mmu-miR-188-5p	2.70078	3.61642	4.6368	0.00501019	0.0427793	-2.53334	Hps1	Hermansky-Pudlak syndrome 1 homolog (human) (Hps1)	NM_019424	126722683	7	2417	CAUCCCU	2411	3UTR	0.0291	1		Des	desmin (Des)	NM_010043	576067924
mmu-miR-188-5p	2.70078	3.61642	4.6368	0.00501019	0.0427793	-2.53334	Slc22a4	solute carrier family 22 (organic cation transporter)	NM_019687	118130537	7	1995	AUCCCUU	1989	3UTR	0.0291	2		Dexi	dexamethasone-induced transcript (Dexi)	NM_021428	109809749
mmu-miR-188-5p	2.70078	3.61642	4.6368	0.00501019	0.0427793	-2.53334	Tsc22d4	TSC22 domain family, member 4 (Tsc22d4)	NM_023910	356995844	7	1975	CAUCCCU	1969	3UTR	0.029	1		Dgat1	diacylglycerol O-acyltransferase 1 (Dgat1)	NM_010046	31981804
mmu-miR-188-5p	2.70078	3.61642	4.6368	0.00501019	0.0427793	-2.53334	Tlcd1	TLC domain containing 1 (Tlcd1)	NM_026708	601984165	7	872	AUCCCUU	866	3UTR	0.0288	2		Dgat2l4	acyl-CoA wax alcohol acyltransferase 2 (Awat2)	NM_177746	594150398
mmu-miR-188-5p	2.70078	3.61642	4.6368	0.00501019	0.0427793	-2.53334	Chaf1a	chromatin assembly factor 1, subunit A (p150) (Chaf1a)	NM_013733	142376418	7	3250	CAUCCCU	3244	3UTR	0.0286	1		Dgcr2	DiGeorge syndrome critical region gene 2 (Dgcr2)	NM_010048	157909808
mmu-miR-188-5p	2.70078	3.61642	4.6368	0.00501019	0.0427793	-2.53334	Crtc2	CREB regulated transcription coactivator 2 (Crtc2)	NM_028881	254028192	7	2508	AUCCCUU	2502	3UTR	0.0286	2		Dgka	diacylglycerol kinase, alpha (Dgka)	NM_016811	31560473
mmu-miR-188-5p	2.70078	3.61642	4.6368	0.00501019	0.0427793	-2.53334	Poldip3	polymerase (DNA-directed)	NM_178627	146198555	8	1453	AUCCCUUG	1446	3UTR	0.0286	2		Dgkb	diacylglycerol kinase, beta (Dgkb)	NM_178681	142365036
mmu-miR-188-5p	2.70078	3.61642	4.6368	0.00501019	0.0427793	-2.53334	Psca	prostate stem cell antigen (Psca)	NM_028216	262263418	7	428	AUCCCUU	422	3UTR	0.0285	2		Dgke	diacylglycerol kinase, epsilon (Dgke)	NM_019505	126432551
mmu-miR-188-5p	2.70078	3.61642	4.6368	0.00501019	0.0427793	-2.53334	Zfp191	zinc finger protein 191 (Zfp191)	NM_021559	47059077	8	2279	AUCCCUUG	2272	3UTR	0.0285	2		Dgkq	diacylglycerol kinase, theta (Dgkq)	NM_199011	39841022
mmu-miR-188-5p	2.70078	3.61642	4.6368	0.00501019	0.0427793	-2.53334	Cops2	COP9 (constitutive photomorphogenic) homolog, subunit 2 (Arabidopsis thaliana) (Cops2)	NM_009939	551895152	8	1467	CAUCCCUU	1460	3UTR	0.0284	1		Dgkz	diacylglycerol kinase zeta (Dgkz)	NM_138306	262205327
mmu-miR-188-5p	2.70078	3.61642	4.6368	0.00501019	0.0427793	-2.53334	BC050078	zinc finger protein 867 (Zfp867)	NM_178417	266456485	8	3290	AUCCCUUG	3283	3UTR	0.0283	2		Dhcr7	7-dehydrocholesterol reductase (Dhcr7)	NM_007856	42544247
mmu-miR-188-5p	2.70078	3.61642	4.6368	0.00501019	0.0427793	-2.53334	Chrna2	cholinergic receptor, nicotinic, alpha polypeptide 2 (neuronal) (Chrna2)	NM_144803	133892762	8	2013	CAUCCCUU	2006	3UTR	0.0282	1		Dhdds	dehydrodolichyl diphosphate synthase (Dhdds)	NM_026144	146149290
mmu-miR-188-5p	2.70078	3.61642	4.6368	0.00501019	0.0427793	-2.53334	Chrna2	cholinergic receptor, nicotinic, alpha polypeptide 2 (neuronal) (Chrna2)	NM_144803	133892762	8	2693	AUCCCUUG	2686	3UTR	0.0282	2		Dhfr	dihydrofolate reductase (Dhfr)	NM_010049	68299777
mmu-miR-188-5p	2.70078	3.61642	4.6368	0.00501019	0.0427793	-2.53334	Serpinb3a	serine (or cysteine) peptidase inhibitor, clade B (ovalbumin)	NM_009126	226958517	7	1433	AUCCCUU	1427	3UTR	0.0281	2		Dhodh	dihydroorotate dehydrogenase (Dhodh)	NM_020046	85677502
mmu-miR-188-5p	2.70078	3.61642	4.6368	0.00501019	0.0427793	-2.53334	Was	Wiskott-Aldrich syndrome homolog (human) (Was)	NM_009515	262231831	7	1742	CAUCCCU	1736	3UTR	0.0281	1		Dhrs13	dehydrogenase/reductase (SDR family) member 13 (Dhrs13)	NM_183286	117647266
mmu-miR-188-5p	2.70078	3.61642	4.6368	0.00501019	0.0427793	-2.53334	Cdc2a	cyclin-dependent kinase 1 (Cdk1)	NM_007659	141803421	8	1847	CAUCCCUU	1840	3UTR	0.028	1		Dhtkd1	dehydrogenase E1 and transketolase domain containing 1 (Dhtkd1)	NM_001081131	147906510
mmu-miR-188-5p	2.70078	3.61642	4.6368	0.00501019	0.0427793	-2.53334	Efcbp2	N-terminal EF-hand calcium binding protein 2 (Necab2)	NM_054095	118131117	7	1721	CAUCCCU	1715	3UTR	0.028	1		Dhx57	DEAH (Asp-Glu-Ala-Asp/His) box polypeptide 57 (Dhx57)	NM_198942	254939650
mmu-miR-188-5p	2.70078	3.61642	4.6368	0.00501019	0.0427793	-2.53334	1700039E15Rik	RIKEN cDNA 1700039E15 gene (1700039E15Rik)	NM_001033176	85701685	7	1671	CAUCCCU	1665	3UTR	0.0277	1		Dhx58	DEXH (Asp-Glu-X-His) box polypeptide 58 (Dhx58)	NM_030150	70608132
mmu-miR-188-5p	2.70078	3.61642	4.6368	0.00501019	0.0427793	-2.53334	Ftmt	ferritin mitochondrial (Ftmt)	NM_026286	247270150	7	1041	CAUCCCU	1035	3UTR	0.0276	1		Dhx8	DEAH (Asp-Glu-Ala-His) box polypeptide 8 (Dhx8)	NM_144831	56699439
mmu-miR-188-5p	2.70078	3.61642	4.6368	0.00501019	0.0427793	-2.53334	Synpo	synaptopodin (Synpo)	NM_177340	158303334	8	4520	CAUCCCUU	4513	3UTR	0.0276	1		Dio3	deiodinase, iodothyronine type III (Dio3)	NM_172119	111494233
mmu-miR-188-5p	2.70078	3.61642	4.6368	0.00501019	0.0427793	-2.53334	Cabin1	calcineurin binding protein 1 (Cabin1)	NM_172549	92859876	7	7275	CAUCCCU	7269	3UTR	0.0275	1		Dip2b	DIP2 disco-interacting protein 2 homolog B (Drosophila) (Dip2b)	NM_172819	226823265
mmu-miR-188-5p	2.70078	3.61642	4.6368	0.00501019	0.0427793	-2.53334	4933407P14Rik	signal peptide peptidase 2C (Sppl2c)	NM_001082535	126722668	7	2015	CAUCCCU	2009	3UTR	0.0274	1		Dip2c	DIP2 disco-interacting protein 2 homolog C (Drosophila) (Dip2c)	NM_001081426	323462205
mmu-miR-188-5p	2.70078	3.61642	4.6368	0.00501019	0.0427793	-2.53334	Fermt3	fermitin family homolog 3 (Drosophila) (Fermt3)	NM_153795	270341398	7	2353	CAUCCCU	2347	3UTR	0.0274	1		Diras1	DIRAS family, GTP-binding RAS-like 1 (Diras1)	NM_145217	40254099
mmu-miR-188-5p	2.70078	3.61642	4.6368	0.00501019	0.0427793	-2.53334	Mageb3	melanoma antigen, family B, 3 (Mageb3)	NM_008545	31543227	7	2165	AUCCCUU	2159	3UTR	0.0274	2		Diras2	DIRAS family, GTP-binding RAS-like 2 (Diras2)	NM_001024474	114326529
mmu-miR-188-5p	2.70078	3.61642	4.6368	0.00501019	0.0427793	-2.53334	Nup214	nucleoporin 214 (Nup214)	NM_172268	124378032	8	7951	AUCCCUUG	7944	3UTR	0.0274	2		Dirc2	disrupted in renal carcinoma 2 (human) (Dirc2)	NM_153550	118130106
mmu-miR-188-5p	2.70078	3.61642	4.6368	0.00501019	0.0427793	-2.53334	Rab9	RAB9, member RAS oncogene family (Rab9)	NM_019773	328683441	7	836	AUCCCUU	830	3UTR	0.0274	2		Dis3l2	DIS3 mitotic control homolog (S. cerevisiae)-like 2 (Dis3l2)	NM_153530	288541374
mmu-miR-188-5p	2.70078	3.61642	4.6368	0.00501019	0.0427793	-2.53334	Sorcs3	sortilin-related VPS10 domain containing receptor 3 (Sorcs3)	NM_025696	118130290	8	4013	CAUCCCUU	4006	3UTR	0.0274	1		Dixdc1	DIX domain containing 1 (Dixdc1)	NM_178118	257796243
mmu-miR-188-5p	2.70078	3.61642	4.6368	0.00501019	0.0427793	-2.53334	Wbscr18	DnaJ (Hsp40) homolog, subfamily C, member 30 (Dnajc30)	NM_025362	125988406	7	729	AUCCCUU	723	3UTR	0.0274	2		Dkk1	dickkopf homolog 1 (Xenopus laevis) (Dkk1)	NM_010051	118129892
mmu-miR-188-5p	2.70078	3.61642	4.6368	0.00501019	0.0427793	-2.53334	2010012O05Rik	RIKEN cDNA 2010012O05 gene (2010012O05Rik)	NM_025563	133893035	8	2013	AUCCCUUG	2006	3UTR	0.0273	2		Dkk2	dickkopf homolog 2 (Xenopus laevis) (Dkk2)	NM_020265	240120169
mmu-miR-188-5p	2.70078	3.61642	4.6368	0.00501019	0.0427793	-2.53334	Fpgs	folylpolyglutamyl synthetase (Fpgs)	NM_010236	172088162	7	1937	CAUCCCU	1931	3UTR	0.0272	1		Dkk3	dickkopf homolog 3 (Xenopus laevis) (Dkk3)	NM_015814	31560475
mmu-miR-188-5p	2.70078	3.61642	4.6368	0.00501019	0.0427793	-2.53334	Adra1a	adrenergic receptor, alpha 1a (Adra1a)	NM_013461	418203910	8	2364	CAUCCCUU	2357	3UTR	0.0271	1		Dkk4	dickkopf homolog 4 (Xenopus laevis) (Dkk4)	NM_145592	128485763
mmu-miR-188-5p	2.70078	3.61642	4.6368	0.00501019	0.0427793	-2.53334	Arcn1	archain 1 (Arcn1)	NM_145985	148747409	8	2201	CAUCCCUU	2194	3UTR	0.0271	1		Dlc1	deleted in liver cancer 1 (Dlc1)	NM_015802	302699222
mmu-miR-188-5p	2.70078	3.61642	4.6368	0.00501019	0.0427793	-2.53334	Cyp4f14	cytochrome P450, family 4, subfamily f, polypeptide 14 (Cyp4f14)	NM_022434	324120983	7	1976	AUCCCUU	1970	3UTR	0.027	2		Dld	dihydrolipoamide dehydrogenase (Dld)	NM_007861	575771934
mmu-miR-188-5p	2.70078	3.61642	4.6368	0.00501019	0.0427793	-2.53334	Gabarap	gamma-aminobutyric acid receptor associated protein (Gabarap)	NM_019749	226423859	7	1061	AUCCCUU	1055	3UTR	0.0269	2		Dleu7	deleted in lymphocytic leukemia, 7 (Dleu7)	NM_173419	299758520
mmu-miR-188-5p	2.70078	3.61642	4.6368	0.00501019	0.0427793	-2.53334	Gm1574	stathmin domain containing 1 (Stmnd1)	NM_001005422	53749205	7	1060	CAUCCCU	1054	3UTR	0.0269	1		Dlgap1	discs, large (Drosophila) homolog-associated protein 1 (Dlgap1)	NM_177639	189491676
mmu-miR-188-5p	2.70078	3.61642	4.6368	0.00501019	0.0427793	-2.53334	Hdgfl1	hepatoma derived growth factor-like 1 (Hdgfl1)	NM_008232	254553322	7	1141	CAUCCCU	1135	3UTR	0.0269	1		Dlgap4	discs, large homolog-associated protein 4 (Drosophila) (Dlgap4)	NM_146128	464397380
mmu-miR-188-5p	2.70078	3.61642	4.6368	0.00501019	0.0427793	-2.53334	Jmjd2d	lysine (K)-specific demethylase 4D (Kdm4d)	NM_173433	116174755	7	2240	CAUCCCU	2234	3UTR	0.0269	1		Dll1	delta-like 1 (Drosophila) (Dll1)	NM_007865	164565442
mmu-miR-188-5p	2.70078	3.61642	4.6368	0.00501019	0.0427793	-2.53334	Lrrc49	leucine rich repeat containing 49 (Lrrc49)	NM_145616	225690563	7	2539	CAUCCCU	2533	3UTR	0.0269	1		Dll3	delta-like 3 (Drosophila) (Dll3)	NM_007866	116292183
mmu-miR-188-5p	2.70078	3.61642	4.6368	0.00501019	0.0427793	-2.53334	Ly9	lymphocyte antigen 9 (Ly9)	NM_008534	485464597	7	2375	CAUCCCU	2369	3UTR	0.0269	1		Dlx2	distal-less homeobox 2 (Dlx2)	NM_010054	164565443
mmu-miR-188-5p	2.70078	3.61642	4.6368	0.00501019	0.0427793	-2.53334	Ly9	lymphocyte antigen 9 (Ly9)	NM_008534	485464597	7	2362	CAUCCCU	2356	3UTR	0.0269	1		Dmd	dystrophin, muscular dystrophy (Dmd)	NM_007868	183396799
mmu-miR-188-5p	2.70078	3.61642	4.6368	0.00501019	0.0427793	-2.53334	Rprml	reprimo-like (Rprml)	NM_001033212	141802486	7	890	CAUCCCU	884	3UTR	0.0269	1		Dmrtc1a	DMRT-like family C1a (Dmrtc1a)	NM_027591	269995938
mmu-miR-188-5p	2.70078	3.61642	4.6368	0.00501019	0.0427793	-2.53334	Tmeff2	transmembrane protein with EGF-like and two follistatin-like domains 2 (Tmeff2)	NM_019790	229576834	8	2003	AUCCCUUG	1996	3UTR	0.0269	2		Dmrtc1b	DMRT-like family C1b (Dmrtc1b)	NM_001039116	269784716
mmu-miR-188-5p	2.70078	3.61642	4.6368	0.00501019	0.0427793	-2.53334	Ensa	endosulfine alpha (Ensa)	NM_001026212	71061465	8	1651	CAUCCCUU	1644	3UTR	0.0268	1		Dmrtc2	doublesex and mab-3 related transcription factor like family C2 (Dmrtc2)	NM_027732	298286496
mmu-miR-188-5p	2.70078	3.61642	4.6368	0.00501019	0.0427793	-2.53334	Mknk2	MAP kinase-interacting serine/threonine kinase 2 (Mknk2)	NM_021462	700584893	8	2249	CAUCCCUU	2242	3UTR	0.0268	1		Dmwd	dystrophia myotonica-containing WD repeat motif (Dmwd)	NM_010058	225637537
mmu-miR-188-5p	2.70078	3.61642	4.6368	0.00501019	0.0427793	-2.53334	Sdcbp2	syndecan binding protein (syntenin) 2 (Sdcbp2)	NM_145535	530354659	7	1074	CAUCCCU	1068	3UTR	0.0267	1		Dna2l	DNA replication helicase 2 homolog (yeast) (Dna2)	NM_177372	283837768
mmu-miR-188-5p	2.70078	3.61642	4.6368	0.00501019	0.0427793	-2.53334	Mcm3	minichromosome maintenance deficient 3 (S. cerevisiae) (Mcm3)	NM_008563	118130774	7	2515	AUCCCUU	2509	3UTR	0.0266	2		Dnahc11	dynein, axonemal, heavy chain 11 (Dnah11)	NM_010060	393794753
mmu-miR-188-5p	2.70078	3.61642	4.6368	0.00501019	0.0427793	-2.53334	Sh3bp4	SH3-domain binding protein 4 (Sh3bp4)	NM_133816	118130850	7	3391	CAUCCCU	3385	3UTR	0.0266	1		Dnaja2	DnaJ (Hsp40) homolog, subfamily A, member 2 (Dnaja2)	NM_019794	158508691
mmu-miR-188-5p	2.70078	3.61642	4.6368	0.00501019	0.0427793	-2.53334	Ergic1	endoplasmic reticulum-golgi intermediate compartment (ERGIC) 1 (Ergic1)	NM_026170	118129827	8	1784	AUCCCUUG	1777	3UTR	0.0265	2		Dnaja4	DnaJ (Hsp40) homolog, subfamily A, member 4 (Dnaja4)	NM_021422	299890777
mmu-miR-188-5p	2.70078	3.61642	4.6368	0.00501019	0.0427793	-2.53334	Sphk2	sphingosine kinase 2 (Sphk2)	NM_020011	289191397	7	2884	CAUCCCU	2878	3UTR	0.0265	1		Dnajb12	DnaJ (Hsp40) homolog, subfamily B, member 12 (Dnajb12)	NM_019965	31982700
mmu-miR-188-5p	2.70078	3.61642	4.6368	0.00501019	0.0427793	-2.53334	Trim62	tripartite motif-containing 62 (Trim62)	NM_178110	31342487	8	2396	CAUCCCUU	2389	3UTR	0.0265	1		Dnajb13	DnaJ (Hsp40) related, subfamily B, member 13 (Dnajb13)	NM_153527	29648321
mmu-miR-188-5p	2.70078	3.61642	4.6368	0.00501019	0.0427793	-2.53334	Nlrp1b	NLR family, pyrin domain containing 1B (Nlrp1b)	NM_001040696	110665739	7	3844	CAUCCCU	3838	3UTR	0.0264	1		Dnajb6	DnaJ (Hsp40) homolog, subfamily B, member 6 (Dnajb6)	NM_001037940	188219639
mmu-miR-188-5p	2.70078	3.61642	4.6368	0.00501019	0.0427793	-2.53334	Snapc5	small nuclear RNA activating complex, polypeptide 5 (Snapc5)	NM_183316	113681193	7	708	AUCCCUU	702	3UTR	0.0264	2		Dnajb9	DnaJ (Hsp40) homolog, subfamily B, member 9 (Dnajb9)	NM_013760	142365683
mmu-miR-188-5p	2.70078	3.61642	4.6368	0.00501019	0.0427793	-2.53334	Acvr1b	activin A receptor, type 1B (Acvr1b)	NM_007395	142366071	8	2666	CAUCCCUU	2659	3UTR	0.0262	1		Dnajc1	DnaJ (Hsp40) homolog, subfamily C, member 1 (Dnajc1)	NM_007869	300192989
mmu-miR-188-5p	2.70078	3.61642	4.6368	0.00501019	0.0427793	-2.53334	Pcbd1	pterin 4 alpha carbinolamine dehydratase/dimerization cofactor of hepatocyte nuclear factor 1 alpha (TCF1) 1 (Pcbd1)	NM_025273	575501585	7	514	AUCCCUU	508	3UTR	0.0262	2		Dnajc10	DnaJ (Hsp40) homolog, subfamily C, member 10 (Dnajc10)	NM_024181	119508442
mmu-miR-188-5p	2.70078	3.61642	4.6368	0.00501019	0.0427793	-2.53334	Alg2	asparagine-linked glycosylation 2 (alpha-1,3-mannosyltransferase) (Alg2)	NM_019998	172072656	8	2484	CAUCCCUU	2477	3UTR	0.0261	1		Dnajc18	DnaJ (Hsp40) homolog, subfamily C, member 18 (Dnajc18)	NM_029669	169234762
mmu-miR-188-5p	2.70078	3.61642	4.6368	0.00501019	0.0427793	-2.53334	Chst8	carbohydrate (N-acetylgalactosamine 4-0) sulfotransferase 8 (Chst8)	NM_175140	255522961	7	1972	CAUCCCU	1966	3UTR	0.0261	1		Dnajc19	DnaJ (Hsp40) homolog, subfamily C, member 19 (Dnajc19)	NM_001026211	559767235
mmu-miR-188-5p	2.70078	3.61642	4.6368	0.00501019	0.0427793	-2.53334	Lgr4	leucine-rich repeat-containing G protein-coupled receptor 4 (Lgr4)	NM_172671	124430558	8	4155	AUCCCUUG	4148	3UTR	0.0261	2		Dnajc22	DnaJ (Hsp40) homolog, subfamily C, member 22 (Dnajc22)	NM_176835	31341187
mmu-miR-188-5p	2.70078	3.61642	4.6368	0.00501019	0.0427793	-2.53334	Phox2b	paired-like homeobox 2b (Phox2b)	NM_008888	229577231	8	1417	AUCCCUUG	1410	3UTR	0.026	2		Dnajc5	DnaJ (Hsp40) homolog, subfamily C, member 5 (Dnajc5)	NM_016775	409191593
mmu-miR-188-5p	2.70078	3.61642	4.6368	0.00501019	0.0427793	-2.53334	Serpinb3c	serine (or cysteine) peptidase inhibitor, clade B, member 3C (Serpinb3c)	NM_201363	160333612	7	1463	AUCCCUU	1457	3UTR	0.0258	2		Dnajc9	DnaJ (Hsp40) homolog, subfamily C, member 9 (Dnajc9)	NM_134081	270309121
mmu-miR-188-5p	2.70078	3.61642	4.6368	0.00501019	0.0427793	-2.53334	Elf1	E74-like factor 1 (Elf1)	NM_007920	556695365	8	3542	CAUCCCUU	3535	3UTR	0.0257	1		Dnase1l2	deoxyribonuclease 1-like 2 (Dnase1l2)	NM_025718	148539952
mmu-miR-188-5p	2.70078	3.61642	4.6368	0.00501019	0.0427793	-2.53334	Fut2	fucosyltransferase 2 (Fut2)	NM_018876	431822424	8	2042	CAUCCCUU	2035	3UTR	0.0257	1		Dnase2a	deoxyribonuclease II alpha (Dnase2a)	NM_010062	87299638
mmu-miR-188-5p	2.70078	3.61642	4.6368	0.00501019	0.0427793	-2.53334	Gjc1	gap junction protein, gamma 1 (Gjc1)	NM_008122	226874803	7	2134	CAUCCCU	2128	3UTR	0.0257	1		Dnm1	dynamin 1 (Dnm1)	NM_010065	684179330
mmu-miR-188-5p	2.70078	3.61642	4.6368	0.00501019	0.0427793	-2.53334	Glb1l2	galactosidase, beta 1-like 2 (Glb1l2)	NM_153803	24418924	8	2917	AUCCCUUG	2910	3UTR	0.0257	2		Dnm1l	dynamin 1-like (Dnm1l)	NM_152816	448261632
mmu-miR-188-5p	2.70078	3.61642	4.6368	0.00501019	0.0427793	-2.53334	Pnpla2	patatin-like phospholipase domain containing 2 (Pnpla2)	NM_025802	254826781	7	1590	CAUCCCU	1584	3UTR	0.0257	1		Dnmbp	dynamin binding protein (Dnmbp)	NM_028029	394025678
mmu-miR-188-5p	2.70078	3.61642	4.6368	0.00501019	0.0427793	-2.53334	Six1	sine oculis-related homeobox 1 (Six1)	NM_009189	226958386	8	1171	CAUCCCUU	1164	3UTR	0.0257	1		Doc2a	double C2, alpha (Doc2a)	NM_010069	33859539
mmu-miR-188-5p	2.70078	3.61642	4.6368	0.00501019	0.0427793	-2.53334	Xpnpep1	X-prolyl aminopeptidase (aminopeptidase P) 1, soluble (Xpnpep1)	NM_133216	406855426	7	2293	CAUCCCU	2287	3UTR	0.0257	1		Dock3	dedicator of cyto-kinesis 3 (Dock3)	NM_153413	148277095
mmu-miR-188-5p	2.70078	3.61642	4.6368	0.00501019	0.0427793	-2.53334	Gla	galactosidase, alpha (Gla)	NM_013463	133778923	8	2488	AUCCCUUG	2481	3UTR	0.0256	2		Dock7	dedicator of cytokinesis 7 (Dock7)	NM_026082	594591557
mmu-miR-188-5p	2.70078	3.61642	4.6368	0.00501019	0.0427793	-2.53334	Yeats2	YEATS domain containing 2 (Yeats2)	NM_001033237	225543567	8	5491	AUCCCUUG	5484	3UTR	0.0256	2		Dok1	docking protein 1 (Dok1)	NM_010070	171916082
mmu-miR-188-5p	2.70078	3.61642	4.6368	0.00501019	0.0427793	-2.53334	Apitd1	apoptosis-inducing, TAF9-like domain 1 (Apitd1)	NM_027263	229892324	7	560	CAUCCCU	554	3UTR	0.0255	1		Dok2	docking protein 2 (Dok2)	NM_010071	118129891
mmu-miR-188-5p	2.70078	3.61642	4.6368	0.00501019	0.0427793	-2.53334	Acad11	nephronophthisis 3 (adolescent) (Nphp3)	NM_028721	159131888	8	4642	CAUCCCUU	4635	3UTR	0.0253	1		Dok3	docking protein 3 (Dok3)	NM_013739	118130854
mmu-miR-188-5p	2.70078	3.61642	4.6368	0.00501019	0.0427793	-2.53334	Acad11	nephronophthisis 3 (adolescent) (Nphp3)	NM_028721	159131888	8	4614	CAUCCCUU	4607	3UTR	0.0253	1		Dok7	docking protein 7 (Dok7)	NM_172708	146198807
mmu-miR-188-5p	2.70078	3.61642	4.6368	0.00501019	0.0427793	-2.53334	Cyp8b1	cytochrome P450, family 8, subfamily b, polypeptide 1 (Cyp8b1)	NM_010012	227497651	7	1877	CAUCCCU	1871	3UTR	0.0253	1		Donson	downstream neighbor of SON (Donson)	NM_021720	29789129
mmu-miR-188-5p	2.70078	3.61642	4.6368	0.00501019	0.0427793	-2.53334	Pla2g2f	phospholipase A2, group IIF (Pla2g2f)	NM_012045	254826798	8	1655	CAUCCCUU	1648	3UTR	0.0253	1		Dos	downstream of Stk11	NM_015761	148886756
mmu-miR-188-5p	2.70078	3.61642	4.6368	0.00501019	0.0427793	-2.53334	Arc	activity regulated cytoskeletal-associated protein (Arc)	NM_018790	451958115	8	1483	CAUCCCUU	1476	3UTR	0.0252	1		Dot1l	DOT1-like, histone H3 methyltransferase (S. cerevisiae) (Dot1l)	NM_199322	40556380
mmu-miR-188-5p	2.70078	3.61642	4.6368	0.00501019	0.0427793	-2.53334	Cpsf3l	cleavage and polyadenylation specific factor 3-like (Cpsf3l)	NM_028020	142377466	7	2226	AUCCCUU	2220	3UTR	0.0252	2		Doxl2	diamine oxidase-like protein 2 (Doxl2)	NM_001029987	71725388
mmu-miR-188-5p	2.70078	3.61642	4.6368	0.00501019	0.0427793	-2.53334	Hisppd1	diphosphoinositol pentakisphosphate kinase 2 (Ppip5k2)	NM_173760	553727123	8	5244	CAUCCCUU	5237	3UTR	0.0252	1		Dpagt1	dolichyl-phosphate (UDP-N-acetylglucosamine) acetylglucosaminephosphotransferase 1 (GlcNAc-1-P transferase) (Dpagt1)	NM_007875	31982408
mmu-miR-188-5p	2.70078	3.61642	4.6368	0.00501019	0.0427793	-2.53334	Ebpl	emopamil binding protein-like (Ebpl)	NM_026598	225579143	7	2018	AUCCCUU	2012	3UTR	0.0251	2		Dph1	DPH1 homolog (S. cerevisiae) (Dph1)	NM_144491	118026918
mmu-miR-188-5p	2.70078	3.61642	4.6368	0.00501019	0.0427793	-2.53334	Rdh9	retinol dehydrogenase 9 (Rdh9)	NM_153133	118130113	8	1234	AUCCCUUG	1227	3UTR	0.0251	2		Dpm2	dolichol-phosphate (beta-D) mannosyltransferase 2 (Dpm2)	NM_010073	31560809
mmu-miR-188-5p	2.70078	3.61642	4.6368	0.00501019	0.0427793	-2.53334	Sirt3	sirtuin 3 (Sirt3)	NM_022433	188035864	7	1236	CAUCCCU	1230	3UTR	0.0251	1		Dpp3	dipeptidylpeptidase 3 (Dpp3)	NM_133803	244791123
mmu-miR-188-5p	2.70078	3.61642	4.6368	0.00501019	0.0427793	-2.53334	Man1b1	mannosidase, alpha, class 1B, member 1 (Man1b1)	NM_001029983	294997254	8	3510	AUCCCUUG	3503	3UTR	0.0248	2		Dpp4	dipeptidylpeptidase 4 (Dpp4)	NM_010074	227116290
mmu-miR-188-5p	2.70078	3.61642	4.6368	0.00501019	0.0427793	-2.53334	Rgs16	regulator of G-protein signaling 16 (Rgs16)	NM_011267	190684664	8	1034	CAUCCCUU	1027	3UTR	0.0246	1		Dpp8	dipeptidylpeptidase 8 (Dpp8)	NM_028906	31542570
mmu-miR-188-5p	2.70078	3.61642	4.6368	0.00501019	0.0427793	-2.53334	Senp3	SUMO/sentrin specific peptidase 3 (Senp3)	NM_030702	254939658	7	2216	AUCCCUU	2210	3UTR	0.0246	2		Dpp9	dipeptidylpeptidase 9 (Dpp9)	NM_172624	255003756
mmu-miR-188-5p	2.70078	3.61642	4.6368	0.00501019	0.0427793	-2.53334	Ybx2	Y box protein 2 (Ybx2)	NM_016875	117956376	7	1362	AUCCCUU	1356	3UTR	0.0246	2		Dppa2	developmental pluripotency associated 2 (Dppa2)	NM_028615	58037334
mmu-miR-188-5p	2.70078	3.61642	4.6368	0.00501019	0.0427793	-2.53334	A3galt2	alpha 1,3-galactosyltransferase 2 (isoglobotriaosylceramide synthase) (A3galt2)	NM_001009819	78486564	8	3080	CAUCCCUU	3073	3UTR	0.0245	1		Dppa4	developmental pluripotency associated 4 (Dppa4)	NM_028610	63079712
mmu-miR-188-5p	2.70078	3.61642	4.6368	0.00501019	0.0427793	-2.53334	Peg12	paternally expressed 12 (Peg12)	NM_013788	270309125	8	1031	AUCCCUUG	1024	3UTR	0.0245	2		Dpy19l4	dpy-19-like 4 (C. elegans) (Dpy19l4)	NM_001081201	124487096
mmu-miR-188-5p	2.70078	3.61642	4.6368	0.00501019	0.0427793	-2.53334	Tenc1	tensin like C1 domain-containing phosphatase (Tenc1)	NM_153533	119372287	7	4589	CAUCCCU	4583	3UTR	0.0244	1		Dpysl4	dihydropyrimidinase-like 4 (Dpysl4)	NM_011993	188219523
mmu-miR-188-5p	2.70078	3.61642	4.6368	0.00501019	0.0427793	-2.53334	Epc2	enhancer of polycomb homolog 2 (Drosophila) (Epc2)	NM_172663	157042786	8	3351	CAUCCCUU	3344	3UTR	0.0243	1		Drd1a	dopamine receptor D1A (Drd1a)	NM_010076	164607143
mmu-miR-188-5p	2.70078	3.61642	4.6368	0.00501019	0.0427793	-2.53334	Il9r	interleukin 9 receptor (Il9r)	NM_008374	197333823	8	1483	AUCCCUUG	1476	3UTR	0.0243	2		Drp2	phosphatidylinositol-specific phospholipase C, X domain containing 3 (Plcxd3)	NM_177355	169234800
mmu-miR-188-5p	2.70078	3.61642	4.6368	0.00501019	0.0427793	-2.53334	Orc3l	origin recognition complex, subunit 3 (Orc3)	NM_015824	227116260	8	4367	AUCCCUUG	4360	3UTR	0.0243	2		Dscam	Down syndrome cell adhesion molecule (Dscam)	NM_031174	156151418
mmu-miR-188-5p	2.70078	3.61642	4.6368	0.00501019	0.0427793	-2.53334	1810030O07Rik	RIKEN cDNA 1810030O07 gene (1810030O07Rik)	NM_175141	158508623	8	2442	CAUCCCUU	2435	3UTR	0.0242	1		Dsel	dermatan sulfate epimerase-like (Dsel)	NM_001081316	124486780
mmu-miR-188-5p	2.70078	3.61642	4.6368	0.00501019	0.0427793	-2.53334	B3galtl	disabled 2 interacting protein (Dab2ip)	NM_001001602	166295209	9	5587	CAUCCCUUG	5579	3UTR	0.0242	1		Dsg2	desmoglein 2 (Dsg2)	NM_007883	161016842
mmu-miR-188-5p	2.70078	3.61642	4.6368	0.00501019	0.0427793	-2.53334	Bnip1	BCL2/adenovirus E1B interacting protein 1 (Bnip1)	NM_172149	255003751	7	1042	CAUCCCU	1036	3UTR	0.0241	1		Dsg3	desmoglein 3 (Dsg3)	NM_030596	142376201
mmu-miR-188-5p	2.70078	3.61642	4.6368	0.00501019	0.0427793	-2.53334	Cplx1	complexin 1 (Cplx1)	NM_007756	227330543	8	688	AUCCCUUG	681	3UTR	0.0241	2		Dsn1	DSN1, MIND kinetochore complex component, homolog (S. cerevisiae) (Dsn1)	NM_025853	254540033
mmu-miR-188-5p	2.70078	3.61642	4.6368	0.00501019	0.0427793	-2.53334	Psmd3	proteasome (prosome, macropain) 26S subunit, non-ATPase, 3 (Psmd3)	NM_009439	19705423	7	1903	CAUCCCU	1897	3UTR	0.024	1		Dtl	denticleless homolog (Drosophila) (Dtl)	NM_029766	71061464
mmu-miR-188-5p	2.70078	3.61642	4.6368	0.00501019	0.0427793	-2.53334	Slc24a1	solute carrier family 24 (sodium/potassium/calcium exchanger)	NM_144813	21450182	8	4511	CAUCCCUU	4504	3UTR	0.024	1		Dtwd2	DTW domain containing 2 (Dtwd2)	NM_026854	283837779
mmu-miR-188-5p	2.70078	3.61642	4.6368	0.00501019	0.0427793	-2.53334	Arid3c	AT rich interactive domain 3C (BRIGHT-like) (Arid3c)	NM_001017362	134244289	7	1500	AUCCCUU	1494	3UTR	0.0239	2		Dtx2	deltex 2 homolog (Drosophila) (Dtx2)	NM_023742	368711284
mmu-miR-188-5p	2.70078	3.61642	4.6368	0.00501019	0.0427793	-2.53334	Acsbg1	acyl-CoA synthetase bubblegum family member 1 (Acsbg1)	NM_053178	133891660	7	2695	AUCCCUU	2689	3UTR	0.0238	2		Dtx4	deltex 4 homolog (Drosophila) (Dtx4)	NM_172442	188219610
mmu-miR-188-5p	2.70078	3.61642	4.6368	0.00501019	0.0427793	-2.53334	Akap8	A kinase (PRKA) anchor protein 8 (Akap8)	NM_019774	146135004	8	2140	AUCCCUUG	2133	3UTR	0.0238	2		Dusp1	dual specificity phosphatase 1 (Dusp1)	NM_013642	219521883
mmu-miR-188-5p	2.70078	3.61642	4.6368	0.00501019	0.0427793	-2.53334	Dnahc11	dynein, axonemal, heavy chain 11 (Dnah11)	NM_010060	393794753	7	13838	AUCCCUU	13832	3UTR	0.0238	2		Dusp11	dual specificity phosphatase 11 (RNA/RNP complex 1-interacting) (Dusp11)	NM_028099	294459957
mmu-miR-188-5p	2.70078	3.61642	4.6368	0.00501019	0.0427793	-2.53334	Pde1c	phosphodiesterase 1C (Pde1c)	NM_011054	229577064	7	3926	CAUCCCU	3920	3UTR	0.0237	1		Dusp18	dual specificity phosphatase 18 (Dusp18)	NM_173745	254281211
mmu-miR-188-5p	2.70078	3.61642	4.6368	0.00501019	0.0427793	-2.53334	Zc3hc1	zinc finger, C3HC type 1 (Zc3hc1)	NM_172735	142374816	7	1473	AUCCCUU	1467	3UTR	0.0237	2		Dusp21	dual specificity phosphatase 21 (Dusp21)	NM_028568	58037324
mmu-miR-188-5p	2.70078	3.61642	4.6368	0.00501019	0.0427793	-2.53334	Klc4	kinesin light chain 4 (Klc4)	NM_029091	142366781	7	2193	CAUCCCU	2187	3UTR	0.0236	1		Dusp22	dual specificity phosphatase 22 (Dusp22)	NM_134068	554790290
mmu-miR-188-5p	2.70078	3.61642	4.6368	0.00501019	0.0427793	-2.53334	Ndrg1	N-myc downstream regulated gene 1 (Ndrg1)	NM_008681	118150657	8	2707	AUCCCUUG	2700	3UTR	0.0236	2		Dusp26	dual specificity phosphatase 26 (putative) (Dusp26)	NM_025869	146135077
mmu-miR-188-5p	2.70078	3.61642	4.6368	0.00501019	0.0427793	-2.53334	Twf2	twinfilin, actin-binding protein, homolog 2 (Drosophila) (Twf2)	NM_011876	133891654	7	1551	AUCCCUU	1545	3UTR	0.0236	2		Dusp4	dual specificity phosphatase 4 (Dusp4)	NM_176933	142364920
mmu-miR-188-5p	2.70078	3.61642	4.6368	0.00501019	0.0427793	-2.53334	Klk11	kallikrein related-peptidase 11 (Klk11)	NM_019974	293651561	7	962	CAUCCCU	956	3UTR	0.0235	1		Dvl1	dishevelled, dsh homolog 1 (Drosophila) (Dvl1)	NM_010091	697271930
mmu-miR-188-5p	2.70078	3.61642	4.6368	0.00501019	0.0427793	-2.53334	Slc22a8	solute carrier family 22 (organic anion transporter)	NM_031194	257467526	8	2611	AUCCCUUG	2604	3UTR	0.0235	2		Dvl3	dishevelled 3, dsh homolog (Drosophila) (Dvl3)	NM_007889	117168286
mmu-miR-188-5p	2.70078	3.61642	4.6368	0.00501019	0.0427793	-2.53334	Aldh3a2	aldehyde dehydrogenase family 3, subfamily A2 (Aldh3a2)	NM_007437	692314724	8	2558	CAUCCCUU	2551	3UTR	0.0234	1		Dync1i2	dynein cytoplasmic 1 intermediate chain 2 (Dync1i2)	NM_010064	311893372
mmu-miR-188-5p	2.70078	3.61642	4.6368	0.00501019	0.0427793	-2.53334	Cnpy1	canopy 1 homolog (zebrafish) (Cnpy1)	NM_175651	146198765	8	782	CAUCCCUU	775	3UTR	0.0234	1		Dync1li2	dynein, cytoplasmic 1 light intermediate chain 2 (Dync1li2)	NM_001013380	225543180
mmu-miR-188-5p	2.70078	3.61642	4.6368	0.00501019	0.0427793	-2.53334	Klhl25	kelch-like 25 (Klhl25)	NM_182782	170671736	7	2144	CAUCCCU	2138	3UTR	0.0233	1		Dynll1	dynein light chain LC8-type 1 (Dynll1)	NM_019682	213688405
mmu-miR-188-5p	2.70078	3.61642	4.6368	0.00501019	0.0427793	-2.53334	Tegt	transmembrane BAX inhibitor motif containing 6 (Tmbim6)	NM_026669	283945631	8	2016	CAUCCCUU	2009	3UTR	0.0233	1		Dynlrb2	dynein light chain roadblock-type 2 (Dynlrb2)	NM_029297	25072206
mmu-miR-188-5p	2.70078	3.61642	4.6368	0.00501019	0.0427793	-2.53334	Slit2	slit homolog 2 (Drosophila) (Slit2)	NM_178804	601983933	8	6927	AUCCCUUG	6920	3UTR	0.0232	2		Dyrk1a	dual-specificity tyrosine-(Y)-phosphorylation regulated kinase 1a (Dyrk1a)	NM_007890	164607148
mmu-miR-188-5p	2.70078	3.61642	4.6368	0.00501019	0.0427793	-2.53334	Rab13	RAB13, member RAS oncogene family (Rab13)	NM_026677	657188863	7	892	AUCCCUU	886	3UTR	0.0229	2		Dyx1c1	dyslexia susceptibility 1 candidate 1 homolog (human) (Dyx1c1)	NM_026314	255683352
mmu-miR-188-5p	2.70078	3.61642	4.6368	0.00501019	0.0427793	-2.53334	Uqcc	ubiquinol-cytochrome c reductase complex assembly factor 1 (Uqcc1)	NM_018888	295821194	8	1453	CAUCCCUU	1446	3UTR	0.0229	1		Dzip1l	DAZ interacting protein 1-like (Dzip1l)	NM_028258	118130444
mmu-miR-188-5p	2.70078	3.61642	4.6368	0.00501019	0.0427793	-2.53334	Clip3	CAP-GLY domain containing linker protein 3 (Clip3)	NM_001081114	124487424	8	2090	AUCCCUUG	2083	3UTR	0.0227	2		E130012A19Rik	RIKEN cDNA E130012A19 gene (E130012A19Rik)	NM_175332	111185891
mmu-miR-188-5p	2.70078	3.61642	4.6368	0.00501019	0.0427793	-2.53334	Ctage5	CTAGE family, member 5 (Ctage5)	NM_146034	259155333	7	2767	CAUCCCU	2761	3UTR	0.0227	1		E130306D19Rik	Rho guanine nucleotide exchange factor (GEF) 39 (Arhgef39)	NM_001013377	225543123
mmu-miR-188-5p	2.70078	3.61642	4.6368	0.00501019	0.0427793	-2.53334	Papln	papilin, proteoglycan-like sulfated glycoprotein (Papln)	NM_130887	329299030	7	3973	AUCCCUU	3967	3UTR	0.0226	2		E130309D02Rik	RIKEN cDNA E130309D02 gene (E130309D02Rik)	NM_172726	170650678
mmu-miR-188-5p	2.70078	3.61642	4.6368	0.00501019	0.0427793	-2.53334	Lsm2	LSM2 homolog, U6 small nuclear RNA associated (S. cerevisiae) (Lsm2)	NM_030597	158533993	7	825	CAUCCCU	819	3UTR	0.0225	1		E130309D14Rik	RIKEN cDNA E130309D14 gene (E130309D14Rik)	NM_001013784	62000657
mmu-miR-188-5p	2.70078	3.61642	4.6368	0.00501019	0.0427793	-2.53334	Orc2l	origin recognition complex, subunit 2 (Orc2)	NM_008765	408440821	8	2517	AUCCCUUG	2510	3UTR	0.0223	2		E130311K13Rik	RIKEN cDNA E130311K13 gene (E130311K13Rik)	NM_177856	146198832
mmu-miR-188-5p	2.70078	3.61642	4.6368	0.00501019	0.0427793	-2.53334	Usp40	ubiquitin specific peptidase 40 (Usp40)	NM_001033291	133893155	8	3718	CAUCCCUU	3711	3UTR	0.0223	1		E230019M04Rik	RIKEN cDNA E230019M04 gene (E230019M04Rik)	NM_177921	142368472
mmu-miR-188-5p	2.70078	3.61642	4.6368	0.00501019	0.0427793	-2.53334	Pank2	pantothenate kinase 2 (Pank2)	NM_153501	227496251	7	2201	CAUCCCU	2195	3UTR	0.0222	1		E2f1	E2F transcription factor 1 (E2f1)	NM_007891	597955352
mmu-miR-188-5p	2.70078	3.61642	4.6368	0.00501019	0.0427793	-2.53334	Sidt1	SID1 transmembrane family, member 1 (Sidt1)	NM_198034	226874929	8	2978	CAUCCCUU	2971	3UTR	0.0222	1		E2f3	E2F transcription factor 3 (E2f3)	NM_010093	164607185
mmu-miR-188-5p	2.70078	3.61642	4.6368	0.00501019	0.0427793	-2.53334	Wdr78	WD repeat domain 78 (Wdr78)	NM_146254	334688817	8	2367	AUCCCUUG	2360	3UTR	0.0222	2		E2f5	E2F transcription factor 5 (E2f5)	NM_007892	31982404
mmu-miR-188-5p	2.70078	3.61642	4.6368	0.00501019	0.0427793	-2.53334	Cd83	CD83 antigen (Cd83)	NM_009856	583966106	8	2079	CAUCCCUU	2072	3UTR	0.0221	1		E2f6	E2F transcription factor 6 (E2f6)	NM_033270	237681137
mmu-miR-188-5p	2.70078	3.61642	4.6368	0.00501019	0.0427793	-2.53334	Sult1c2	sulfotransferase family, cytosolic, 1C, member 2 (Sult1c2)	NM_026935	118130315	7	1436	AUCCCUU	1430	3UTR	0.022	2		E2f7	E2F transcription factor 7 (E2f7)	NM_178609	115270983
mmu-miR-188-5p	2.70078	3.61642	4.6368	0.00501019	0.0427793	-2.53334	Akr1c14	aldo-keto reductase family 1, member C14 (Akr1c14)	NM_134072	19527293	8	2015	AUCCCUUG	2008	3UTR	0.0218	2		E330009J07Rik	RIKEN cDNA E330009J07 gene (E330009J07Rik)	NM_175528	146198751
mmu-miR-188-5p	2.70078	3.61642	4.6368	0.00501019	0.0427793	-2.53334	H3f3b	H3 histone, family 3B (H3f3b)	NM_008211	116089277	8	770	CAUCCCUU	763	3UTR	0.0218	1		E330016A19Rik	Mab-21 domain containing 1 (Mb21d1)	NM_173386	669250889
mmu-miR-188-5p	2.70078	3.61642	4.6368	0.00501019	0.0427793	-2.53334	Hars2	histidyl-tRNA synthetase 2, mitochondrial (putative) (Hars2)	NM_080636	18079342	8	1902	CAUCCCUU	1895	3UTR	0.0218	1		E330026B02Rik	collagen, type VI, alpha 6 (Col6a6)	NM_172927	156616287
mmu-miR-188-5p	2.70078	3.61642	4.6368	0.00501019	0.0427793	-2.53334	Pappa	pregnancy-associated plasma protein A (Pappa)	NM_021362	59676576	9	7900	CAUCCCUUG	7892	3UTR	0.0218	1		Eapa2	family with sequence similarity 115, member E (Fam115e)	NM_203396	42794266
mmu-miR-188-5p	2.70078	3.61642	4.6368	0.00501019	0.0427793	-2.53334	Gm879	shisa family member 6 (Shisa6)	NM_001034874	281306845	9	6674	AUCCCUUGC	6666	3UTR	0.0217	2		Ear11	ribonuclease, RNase A family, 2A (liver, eosinophil-derived neurotoxin) (Rnase2a)	NM_053113	31981459
mmu-miR-188-5p	2.70078	3.61642	4.6368	0.00501019	0.0427793	-2.53334	Heatr5a	HEAT repeat containing 5A (Heatr5a)	NM_177171	118130348	8	6598	CAUCCCUU	6591	3UTR	0.0217	1		Ear6	eosinophil-associated, ribonuclease A family, member 6 (Ear6)	NM_053111	32891936
mmu-miR-188-5p	2.70078	3.61642	4.6368	0.00501019	0.0427793	-2.53334	Rnf19a	ring finger protein 19A (Rnf19a)	NM_013923	134053884	8	3247	CAUCCCUU	3240	3UTR	0.0217	1		Ebag9	estrogen receptor-binding fragment-associated gene 9 (Ebag9)	NM_019480	111186465
mmu-miR-188-5p	2.70078	3.61642	4.6368	0.00501019	0.0427793	-2.53334	Slc25a28	solute carrier family 25, member 28 (Slc25a28)	NM_145156	21553114	7	1216	AUCCCUU	1210	3UTR	0.0217	2		Ebna1bp2	EBNA1 binding protein 2 (Ebna1bp2)	NM_026932	294661851
mmu-miR-188-5p	2.70078	3.61642	4.6368	0.00501019	0.0427793	-2.53334	Tmem90a	synapse differentiation inducing 1 like (Syndig1l)	NM_001033334	133892742	8	1423	AUCCCUUG	1416	3UTR	0.0217	2		Ebpl	emopamil binding protein-like (Ebpl)	NM_026598	225579143
mmu-miR-188-5p	2.70078	3.61642	4.6368	0.00501019	0.0427793	-2.53334	Wdr45	WD repeat domain 45 (Wdr45)	NM_172372	595763412	7	1467	AUCCCUU	1461	3UTR	0.0215	2		Ece2	endothelin converting enzyme 2 (Ece2)	NM_025462	120953155
mmu-miR-188-5p	2.70078	3.61642	4.6368	0.00501019	0.0427793	-2.53334	BC003993	CWC22 spliceosome-associated protein homolog (S. cerevisiae) (Cwc22)	NM_030560	595582352	7	3110	AUCCCUU	3104	3UTR	0.0214	2		Ecel1	endothelin converting enzyme-like 1 (Ecel1)	NM_021306	485050298
mmu-miR-188-5p	2.70078	3.61642	4.6368	0.00501019	0.0427793	-2.53334	Isg20l1	apoptosis enhancing nuclease (Aen)	NM_026531	242397469	8	1816	CAUCCCUU	1809	3UTR	0.0214	1		Echdc2	enoyl Coenzyme A hydratase domain containing 2 (Echdc2)	NM_026728	363543335
mmu-miR-188-5p	2.70078	3.61642	4.6368	0.00501019	0.0427793	-2.53334	Pdcd11	programmed cell death 11 (Pdcd11)	NM_011053	54607127	7	6011	AUCCCUU	6005	3UTR	0.0214	2		Eda	ectodysplasin-A (Eda)	NM_010099	133893370
mmu-miR-188-5p	2.70078	3.61642	4.6368	0.00501019	0.0427793	-2.53334	Prcc	papillary renal cell carcinoma (translocation-associated) (Prcc)	NM_033573	254039720	7	2034	CAUCCCU	2028	3UTR	0.0214	1		Edar	ectodysplasin-A receptor (Edar)	NM_010100	164664525
mmu-miR-188-5p	2.70078	3.61642	4.6368	0.00501019	0.0427793	-2.53334	B230118H07Rik	RIKEN cDNA B230118H07 gene (B230118H07Rik)	NM_026592	142375303	8	1094	CAUCCCUU	1087	3UTR	0.0213	1		Edf1	endothelial differentiation-related factor 1 (Edf1)	NM_021519	10946941
mmu-miR-188-5p	2.70078	3.61642	4.6368	0.00501019	0.0427793	-2.53334	Brs3	bombesin-like receptor 3 (Brs3)	NM_009766	142388449	8	1643	CAUCCCUU	1636	3UTR	0.0212	1		Edn1	endothelin 1 (Edn1)	NM_010104	261599055
mmu-miR-188-5p	2.70078	3.61642	4.6368	0.00501019	0.0427793	-2.53334	Rbl2	retinoblastoma-like 2 (Rbl2)	NM_011250	530537204	8	3774	CAUCCCUU	3767	3UTR	0.0212	1		Edn2	endothelin 2 (Edn2)	NM_007902	122937364
mmu-miR-188-5p	2.70078	3.61642	4.6368	0.00501019	0.0427793	-2.53334	Mpzl1	myelin protein zero-like 1 (Mpzl1)	NM_001083897	140969904	8	2164	CAUCCCUU	2157	3UTR	0.0211	1		Edn3	endothelin 3 (Edn3)	NM_007903	480540326
mmu-miR-188-5p	2.70078	3.61642	4.6368	0.00501019	0.0427793	-2.53334	Smpd1	sphingomyelin phosphodiesterase 1, acid lysosomal (Smpd1)	NM_011421	254750745	7	2049	AUCCCUU	2043	3UTR	0.0211	2		Ednrb	endothelin receptor type B (Ednrb)	NM_007904	443609484
mmu-miR-188-5p	2.70078	3.61642	4.6368	0.00501019	0.0427793	-2.53334	Art1	ADP-ribosyltransferase 1 (Art1)	NM_009710	141803149	7	1234	CAUCCCU	1228	3UTR	0.021	1		Eea1	early endosome antigen 1 (Eea1)	NM_001001932	92859696
mmu-miR-188-5p	2.70078	3.61642	4.6368	0.00501019	0.0427793	-2.53334	Axl	AXL receptor tyrosine kinase (Axl)	NM_009465	300794836	8	3996	AUCCCUUG	3989	3UTR	0.021	2		Eef1a2	eukaryotic translation elongation factor 1 alpha 2 (Eef1a2)	NM_007906	31982852
mmu-miR-188-5p	2.70078	3.61642	4.6368	0.00501019	0.0427793	-2.53334	Axl	AXL receptor tyrosine kinase (Axl)	NM_009465	300794836	8	2907	AUCCCUUG	2900	3UTR	0.021	2		Eef1d	eukaryotic translation elongation factor 1 delta (guanine nucleotide exchange protein) (Eef1d)	NM_029663	549806748
mmu-miR-188-5p	2.70078	3.61642	4.6368	0.00501019	0.0427793	-2.53334	S100a3	S100 calcium binding protein A3 (S100a3)	NM_011310	118130205	7	566	CAUCCCU	560	3UTR	0.021	1		Eef2	eukaryotic translation elongation factor 2 (Eef2)	NM_007907	237858599
mmu-miR-188-5p	2.70078	3.61642	4.6368	0.00501019	0.0427793	-2.53334	Tbx19	mitochondrial calcium uniporter (Mcu)	NM_001033259	364502969	7	1226	AUCCCUU	1220	3UTR	0.021	2		Eef2k	eukaryotic elongation factor-2 kinase (Eef2k)	NM_007908	390979667
mmu-miR-188-5p	2.70078	3.61642	4.6368	0.00501019	0.0427793	-2.53334	Camk1d	calcium/calmodulin-dependent protein kinase ID (Camk1d)	NM_177343	594190795	9	4177	AUCCCUUGC	4169	3UTR	0.0209	2		Eefsec	eukaryotic elongation factor, selenocysteine-tRNA-specific (Eefsec)	NM_023060	111038122
mmu-miR-188-5p	2.70078	3.61642	4.6368	0.00501019	0.0427793	-2.53334	Gas1	growth arrest specific 1 (Gas1)	NM_008086	261823941	8	1905	CAUCCCUU	1898	3UTR	0.0209	1		Efcbp2	N-terminal EF-hand calcium binding protein 2 (Necab2)	NM_054095	118131117
mmu-miR-188-5p	2.70078	3.61642	4.6368	0.00501019	0.0427793	-2.53334	Slc7a7	solute carrier family 7 (cationic amino acid transporter, y+ system)	NM_011405	358439445	7	2060	CAUCCCU	2054	3UTR	0.0207	1		Efemp2	epidermal growth factor-containing fibulin-like extracellular matrix protein 2 (Efemp2)	NM_021474	256355189
mmu-miR-188-5p	2.70078	3.61642	4.6368	0.00501019	0.0427793	-2.53334	Hmbs	hydroxymethylbilane synthase (Hmbs)	NM_013551	159110430	7	1358	CAUCCCU	1352	3UTR	0.0205	1		Efhd2	EF hand domain containing 2 (Efhd2)	NM_025994	141803228
mmu-miR-188-5p	2.70078	3.61642	4.6368	0.00501019	0.0427793	-2.53334	Nudt13	nudix (nucleoside diphosphate linked moiety X)-type motif 13 (Nudt13)	NM_026341	117606386	8	2097	CAUCCCUU	2090	3UTR	0.0204	1		Efna1	ephrin A1 (Efna1)	NM_010107	247269689
mmu-miR-188-5p	2.70078	3.61642	4.6368	0.00501019	0.0427793	-2.53334	Zfp281	zinc finger protein 281 (Zfp281)	NM_177643	237681152	7	3419	AUCCCUU	3413	3UTR	0.0204	2		Efna5	ephrin A5 (Efna5)	NM_207654	226958661
mmu-miR-188-5p	2.70078	3.61642	4.6368	0.00501019	0.0427793	-2.53334	Zfp281	zinc finger protein 281 (Zfp281)	NM_177643	237681152	7	3353	AUCCCUU	3347	3UTR	0.0204	2		Efnb1	ephrin B1 (Efnb1)	NM_010110	145966719
mmu-miR-188-5p	2.70078	3.61642	4.6368	0.00501019	0.0427793	-2.53334	Elf5	E74-like factor 5 (Elf5)	NM_010125	224922781	8	1152	CAUCCCUU	1145	3UTR	0.0203	1		Efnb2	ephrin B2 (Efnb2)	NM_010111	158508443
mmu-miR-188-5p	2.70078	3.61642	4.6368	0.00501019	0.0427793	-2.53334	Jph3	junctophilin 3 (Jph3)	NM_020605	326693918	8	3453	CAUCCCUU	3446	3UTR	0.0203	1		Efnb3	ephrin B3 (Efnb3)	NM_007911	226823306
mmu-miR-188-5p	2.70078	3.61642	4.6368	0.00501019	0.0427793	-2.53334	Prss7	transmembrane protease, serine 15 (Tmprss15)	NM_008941	442565699	7	3670	AUCCCUU	3664	3UTR	0.0203	2		Efs	embryonal Fyn-associated substrate (Efs)	NM_010112	270341365
mmu-miR-188-5p	2.70078	3.61642	4.6368	0.00501019	0.0427793	-2.53334	3110048E14Rik	family with sequence similarity 118, member A (Fam118a)	NM_133750	226051884	8	1831	CAUCCCUU	1824	3UTR	0.0201	1		EG194588	predicted gene 4745 (Gm4745)	NM_001038676	84579822
mmu-miR-188-5p	2.70078	3.61642	4.6368	0.00501019	0.0427793	-2.53334	3110048E14Rik	family with sequence similarity 118, member A (Fam118a)	NM_133750	226051884	8	2398	AUCCCUUG	2391	3UTR	0.0201	2		EG331493	predicted gene 5127 (Gm5127)	NM_001033541	142359007
mmu-miR-188-5p	2.70078	3.61642	4.6368	0.00501019	0.0427793	-2.53334	Letmd1	LETM1 domain containing 1 (Letmd1)	NM_134093	274317736	8	1522	AUCCCUUG	1515	3UTR	0.0201	2		EG434179	predicted gene 5595 (Gm5595)	NM_001008427	56606034
mmu-miR-188-5p	2.70078	3.61642	4.6368	0.00501019	0.0427793	-2.53334	Abcc1	ATP-binding cassette, sub-family C (CFTR/MRP)	NM_008576	357430786	8	5420	CAUCCCUU	5413	3UTR	0.02	1		EG545893	MANSC domain containing 4 (Mansc4)	NM_001034903	146198851
mmu-miR-188-5p	2.70078	3.61642	4.6368	0.00501019	0.0427793	-2.53334	Npm3	nucleoplasmin 3 (Npm3)	NM_008723	6679109	7	644	CAUCCCU	638	3UTR	0.02	1		EG547109	tripartite motif-containing 43A (Trim43a)	NM_001034906	142382012
mmu-miR-188-5p	2.70078	3.61642	4.6368	0.00501019	0.0427793	-2.53334	Gtf3a	general transcription factor III A (Gtf3a)	NM_025652	167466247	8	851	CAUCCCUU	844	3UTR	0.0199	1		EG574403	family with sequence similarity 196, member B (Fam196b)	NM_001025382	294345376
mmu-miR-188-5p	2.70078	3.61642	4.6368	0.00501019	0.0427793	-2.53334	Gtf3a	general transcription factor III A (Gtf3a)	NM_025652	167466247	8	702	CAUCCCUU	695	3UTR	0.0199	1		EG666250	predicted gene 16432 (Gm16432)	NM_001034899	258613937
mmu-miR-188-5p	2.70078	3.61642	4.6368	0.00501019	0.0427793	-2.53334	Igf1	insulin-like growth factor 1 (Igf1)	NM_184052	163659890	7	827	CAUCCCU	821	3UTR	0.0199	1		Egf	epidermal growth factor (Egf)	NM_010113	170172523
mmu-miR-188-5p	2.70078	3.61642	4.6368	0.00501019	0.0427793	-2.53334	Igf1	insulin-like growth factor 1 (Igf1)	NM_184052	163659890	7	804	CAUCCCU	798	3UTR	0.0199	1		Egln2	egl-9 family hypoxia-inducible factor 2 (Egln2)	NM_053208	293651563
mmu-miR-188-5p	2.70078	3.61642	4.6368	0.00501019	0.0427793	-2.53334	AC122398.2	suppressor of cytokine signaling 6 (Socs6)	NM_018821	260436972	8	2096	CAUCCCUU	2089	3UTR	0.0198	1		Egr4	early growth response 4 (Egr4)	NM_020596	118130510
mmu-miR-188-5p	2.70078	3.61642	4.6368	0.00501019	0.0427793	-2.53334	Gypa	glycophorin A (Gypa)	NM_010369	111185917	8	1532	CAUCCCUU	1525	3UTR	0.0198	1		Ehf	ets homologous factor (Ehf)	NM_007914	76096376
mmu-miR-188-5p	2.70078	3.61642	4.6368	0.00501019	0.0427793	-2.53334	Ap3s2	adaptor-related protein complex 3, sigma 2 subunit (Ap3s2)	NM_009682	160707970	9	5442	CAUCCCUUG	5434	3UTR	0.0196	1		Ehhadh	enoyl-Coenzyme A, hydratase/3-hydroxyacyl Coenzyme A dehydrogenase (Ehhadh)	NM_023737	256600255
mmu-miR-188-5p	2.70078	3.61642	4.6368	0.00501019	0.0427793	-2.53334	Gne	glucosamine (UDP-N-acetyl)-2-epimerase/N-acetylmannosamine kinase (Gne)	NM_015828	237681188	7	2680	AUCCCUU	2674	3UTR	0.0196	2		Ehmt2	euchromatic histone lysine N-methyltransferase 2 (Ehmt2)	NM_147151	557440889
mmu-miR-188-5p	2.70078	3.61642	4.6368	0.00501019	0.0427793	-2.53334	Rilp	Rab interacting lysosomal protein (Rilp)	NM_001029938	443609468	7	1376	AUCCCUU	1370	3UTR	0.0196	2		Ei24	etoposide induced 2.4 mRNA (Ei24)	NM_007915	313747482
mmu-miR-188-5p	2.70078	3.61642	4.6368	0.00501019	0.0427793	-2.53334	Car1	carbonic anhydrase 1 (Car1)	NM_009799	145301621	7	941	AUCCCUU	935	3UTR	0.0195	2		Eif1	eukaryotic translation initiation factor 1 (Eif1)	NM_011508	22165346
mmu-miR-188-5p	2.70078	3.61642	4.6368	0.00501019	0.0427793	-2.53334	Rfesd	Rieske (Fe-S) domain containing (Rfesd)	NM_178916	197100625	8	1773	AUCCCUUG	1766	3UTR	0.0195	2		Eif2b5	eukaryotic translation initiation factor 2B, subunit 5 epsilon (Eif2b5)	NM_172265	256542308
mmu-miR-188-5p	2.70078	3.61642	4.6368	0.00501019	0.0427793	-2.53334	Unc84a	Sad1 and UNC84 domain containing 1 (Sun1)	NM_024451	371120820	8	3400	CAUCCCUU	3393	3UTR	0.0195	1		Eif2c2	argonaute RISC catalytic subunit 2 (Ago2)	NM_153178	258613869
mmu-miR-188-5p	2.70078	3.61642	4.6368	0.00501019	0.0427793	-2.53334	Cops7b	COP9 (constitutive photomorphogenic) homolog, subunit 7b (Arabidopsis thaliana) (Cops7b)	NM_172974	118129901	8	1309	AUCCCUUG	1302	3UTR	0.0194	2		Eif2c4	MAS-related GPR, member A2B (Mrgpra2b)	NM_153101	188528699
mmu-miR-188-5p	2.70078	3.61642	4.6368	0.00501019	0.0427793	-2.53334	Mgat5b	mannoside acetylglucosaminyltransferase 5, isoenzyme B (Mgat5b)	NM_172948	65301484	8	3385	AUCCCUUG	3378	3UTR	0.0194	2		Eif2s1	eukaryotic translation initiation factor 2, subunit 1 alpha (Eif2s1)	NM_026114	142386277
mmu-miR-188-5p	2.70078	3.61642	4.6368	0.00501019	0.0427793	-2.53334	Dbpht2	DNA binding protein with his-thr domain (Dbpht2)	NM_198866	115311549	8	2341	CAUCCCUU	2334	3UTR	0.0193	1		Eif2s2	eukaryotic translation initiation factor 2, subunit 2 (beta) (Eif2s2)	NM_026030	115311551
mmu-miR-188-5p	2.70078	3.61642	4.6368	0.00501019	0.0427793	-2.53334	Map1lc3b	microtubule-associated protein 1 light chain 3 beta (Map1lc3b)	NM_026160	158508694	8	487	CAUCCCUU	480	3UTR	0.0193	1		Eif4a1	eukaryotic translation initiation factor 4A1 (Eif4a1)	NM_144958	226823307
mmu-miR-188-5p	2.70078	3.61642	4.6368	0.00501019	0.0427793	-2.53334	Phldb1	pleckstrin homology-like domain, family B, member 1 (Phldb1)	NM_153537	359465562	8	5076	CAUCCCUU	5069	3UTR	0.0193	1		Eif4e	eukaryotic translation initiation factor 4E (Eif4e)	NM_007917	83627716
mmu-miR-188-5p	2.70078	3.61642	4.6368	0.00501019	0.0427793	-2.53334	Cd72	CD72 antigen (Cd72)	NM_007654	160333096	7	1279	AUCCCUU	1273	3UTR	0.0192	2		Eif4ebp1	eukaryotic translation initiation factor 4E binding protein 1 (Eif4ebp1)	NM_007918	122937367
mmu-miR-188-5p	2.70078	3.61642	4.6368	0.00501019	0.0427793	-2.53334	Fcer1g	Fc receptor, IgE, high affinity I, gamma polypeptide (Fcer1g)	NM_010185	91932796	7	623	AUCCCUU	617	3UTR	0.0192	2		Eif4enif1	eukaryotic translation initiation factor 4E nuclear import factor 1 (Eif4enif1)	NM_023743	262118199
mmu-miR-188-5p	2.70078	3.61642	4.6368	0.00501019	0.0427793	-2.53334	Dgka	diacylglycerol kinase, alpha (Dgka)	NM_016811	31560473	7	2621	CAUCCCU	2615	3UTR	0.0191	1		Eif5a	eukaryotic translation initiation factor 5A (Eif5a)	NM_181582	262359892
mmu-miR-188-5p	2.70078	3.61642	4.6368	0.00501019	0.0427793	-2.53334	Snx8	sorting nexin 8 (Snx8)	NM_172277	142375675	8	1705	CAUCCCUU	1698	3UTR	0.0191	1		Ela1	chymotrypsin-like elastase family, member 1 (Cela1)	NM_033612	165932340
mmu-miR-188-5p	2.70078	3.61642	4.6368	0.00501019	0.0427793	-2.53334	Nr0b2	nuclear receptor subfamily 0, group B, member 2 (Nr0b2)	NM_011850	31981365	7	1020	CAUCCCU	1014	3UTR	0.019	1		Ela2a	chymotrypsin-like elastase family, member 2A (Cela2a)	NM_007919	133892984
mmu-miR-188-5p	2.70078	3.61642	4.6368	0.00501019	0.0427793	-2.53334	Cntnap5b	contactin associated protein-like 5B (Cntnap5b)	NM_172851	128485745	8	4369	CAUCCCUU	4362	3UTR	0.0188	1		Elac1	elaC homolog 1 (E. coli) (Elac1)	NM_053255	111074536
mmu-miR-188-5p	2.70078	3.61642	4.6368	0.00501019	0.0427793	-2.53334	Kynu	kynureninase (L-kynurenine hydrolase) (Kynu)	NM_027552	575771851	8	2105	CAUCCCUU	2098	3UTR	0.0188	1		Elf1	E74-like factor 1 (Elf1)	NM_007920	556695365
mmu-miR-188-5p	2.70078	3.61642	4.6368	0.00501019	0.0427793	-2.53334	Ltk	leukocyte tyrosine kinase (Ltk)	NM_203345	159032529	7	2852	CAUCCCU	2846	3UTR	0.0188	1		Elf4	E74-like factor 4 (ets domain transcription factor) (Elf4)	NM_019680	225543335
mmu-miR-188-5p	2.70078	3.61642	4.6368	0.00501019	0.0427793	-2.53334	Plch1	phospholipase C, eta 1 (Plch1)	NM_183191	295148199	8	5460	CAUCCCUU	5453	3UTR	0.0187	1		Elf5	E74-like factor 5 (Elf5)	NM_010125	224922781
mmu-miR-188-5p	2.70078	3.61642	4.6368	0.00501019	0.0427793	-2.53334	Prkrip1	Prkr interacting protein 1 (IL11 inducible) (Prkrip1)	NM_025774	229577262	7	1565	CAUCCCU	1559	3UTR	0.0187	1		Elk1	ELK1, member of ETS oncogene family (Elk1)	NM_007922	380503875
mmu-miR-188-5p	2.70078	3.61642	4.6368	0.00501019	0.0427793	-2.53334	Slc44a2	solute carrier family 44, member 2 (Slc44a2)	NM_152808	312596930	8	3093	AUCCCUUG	3086	3UTR	0.0187	2		Elk3	ELK3, member of ETS oncogene family (Elk3)	NM_013508	157909832
mmu-miR-188-5p	2.70078	3.61642	4.6368	0.00501019	0.0427793	-2.53334	Crhr2	corticotropin releasing hormone receptor 2 (Crhr2)	NM_009953	568599850	8	1683	CAUCCCUU	1676	3UTR	0.0186	1		Elk4	ELK4, member of ETS oncogene family (Elk4)	NM_007923	153792361
mmu-miR-188-5p	2.70078	3.61642	4.6368	0.00501019	0.0427793	-2.53334	Unc50	unc-50 homolog (C. elegans) (Unc50)	NM_026123	83921615	7	1142	AUCCCUU	1136	3UTR	0.0185	2		Ell	elongation factor RNA polymerase II (Ell)	NM_007924	124358952
mmu-miR-188-5p	2.70078	3.61642	4.6368	0.00501019	0.0427793	-2.53334	Gad1	glutamate decarboxylase 1 (Gad1)	NM_008077	145301579	8	2478	CAUCCCUU	2471	3UTR	0.0184	1		Elovl1	elongation of very long chain fatty acids (FEN1/Elo2, SUR4/Elo3, yeast)-like 1 (Elovl1)	NM_001039176	545479160
mmu-miR-188-5p	2.70078	3.61642	4.6368	0.00501019	0.0427793	-2.53334	Zfp784	zinc finger protein 784 (Zfp784)	NM_001039532	295849269	8	1413	CAUCCCUU	1406	3UTR	0.0184	1		Elp2	elongator acetyltransferase complex subunit 2 (Elp2)	NM_021448	134032029
mmu-miR-188-5p	2.70078	3.61642	4.6368	0.00501019	0.0427793	-2.53334	Fdxr	ferredoxin reductase (Fdxr)	NM_007997	6679766	7	1764	CAUCCCU	1758	3UTR	0.0181	1		Emb	embigin (Emb)	NM_010330	226437628
mmu-miR-188-5p	2.70078	3.61642	4.6368	0.00501019	0.0427793	-2.53334	Mtrf1	mitogen-activated protein kinase 8 (Mapk8)	NM_016700	225637490	7	1511	CAUCCCU	1505	3UTR	0.0181	1		Emcn	endomucin (Emcn)	NM_016885	254588119
mmu-miR-188-5p	2.70078	3.61642	4.6368	0.00501019	0.0427793	-2.53334	AC161876.3	major facilitator superfamily domain containing 6 (Mfsd6)	NM_133829	160707918	9	3996	CAUCCCUUG	3988	3UTR	0.018	1		Eme1	essential meiotic endonuclease 1 homolog 1 (S. pombe) (Eme1)	NM_177752	146198573
mmu-miR-188-5p	2.70078	3.61642	4.6368	0.00501019	0.0427793	-2.53334	Sema4b	sema domain, immunoglobulin domain (Ig)	NM_013659	254750740	8	3714	CAUCCCUU	3707	3UTR	0.018	1		Emid1	EMI domain containing 1 (Emid1)	NM_080595	118131093
mmu-miR-188-5p	2.70078	3.61642	4.6368	0.00501019	0.0427793	-2.53334	Fbxo11	F-box protein 11 (Fbxo11)	NM_001081034	124486643	8	3588	CAUCCCUU	3581	3UTR	0.0179	1		Emilin2	elastin microfibril interfacer 2 (Emilin2)	NM_145158	148747228
mmu-miR-188-5p	2.70078	3.61642	4.6368	0.00501019	0.0427793	-2.53334	Aebp2	AE binding protein 2 (Aebp2)	NM_001005605	54112426	9	5800	AUCCCUUGC	5792	3UTR	0.0178	2		Eml5	echinoderm microtubule associated protein like 5 (Eml5)	NM_001081191	124487110
mmu-miR-188-5p	2.70078	3.61642	4.6368	0.00501019	0.0427793	-2.53334	Kptn	kaptin (Kptn)	NM_133727	228480266	7	1560	AUCCCUU	1554	3UTR	0.0178	2		Emp1	epithelial membrane protein 1 (Emp1)	NM_010128	133892886
mmu-miR-188-5p	2.70078	3.61642	4.6368	0.00501019	0.0427793	-2.53334	Ppp1r16a	protein phosphatase 1, regulatory (inhibitor) subunit 16A (Ppp1r16a)	NM_033371	67514552	7	2548	CAUCCCU	2542	3UTR	0.0178	1		Emp2	epithelial membrane protein 2 (Emp2)	NM_007929	111154058
mmu-miR-188-5p	2.70078	3.61642	4.6368	0.00501019	0.0427793	-2.53334	Ankrd9	ankyrin repeat domain 9 (Ankrd9)	NM_175207	141802286	8	2509	AUCCCUUG	2502	3UTR	0.0176	2		En1	engrailed 1 (En1)	NM_010133	157057551
mmu-miR-188-5p	2.70078	3.61642	4.6368	0.00501019	0.0427793	-2.53334	Mboat2	membrane bound O-acyltransferase domain containing 2 (Mboat2)	NM_026037	139948717	8	1770	CAUCCCUU	1763	3UTR	0.0173	1		Enc1	ectodermal-neural cortex 1 (Enc1)	NM_007930	261599056
mmu-miR-188-5p	2.70078	3.61642	4.6368	0.00501019	0.0427793	-2.53334	Ttc39c	tetratricopeptide repeat domain 39C (Ttc39c)	NM_028341	257467485	7	1943	CAUCCCU	1937	3UTR	0.0173	1		Eng	endoglin (Eng)	NM_007932	226437646
mmu-miR-188-5p	2.70078	3.61642	4.6368	0.00501019	0.0427793	-2.53334	Sim2	single-minded homolog 2 (Drosophila) (Sim2)	NM_011377	119226236	8	3525	CAUCCCUU	3518	3UTR	0.0172	1		Enoph1	enolase-phosphatase 1 (Enoph1)	NM_026421	251823871
mmu-miR-188-5p	2.70078	3.61642	4.6368	0.00501019	0.0427793	-2.53334	3830403N18Rik	RIKEN cDNA 3830403N18 gene (3830403N18Rik)	NM_027510	141803393	7	890	AUCCCUU	884	3UTR	0.0171	2		Enpp4	ectonucleotide pyrophosphatase/phosphodiesterase 4 (Enpp4)	NM_199016	84872230
mmu-miR-188-5p	2.70078	3.61642	4.6368	0.00501019	0.0427793	-2.53334	Apex2	apurinic/apyrimidinic endonuclease 2 (Apex2)	NM_029943	21541817	7	1645	CAUCCCU	1639	3UTR	0.0169	1		Ensa	endosulfine alpha (Ensa)	NM_001026212	71061465
mmu-miR-188-5p	2.70078	3.61642	4.6368	0.00501019	0.0427793	-2.53334	Arl2	ADP-ribosylation factor-like 2 (Arl2)	NM_019722	32129285	7	645	CAUCCCU	639	3UTR	0.0168	1		Entpd8	ectonucleoside triphosphate diphosphohydrolase 8 (Entpd8)	NM_028093	112821697
mmu-miR-188-5p	2.70078	3.61642	4.6368	0.00501019	0.0427793	-2.53334	Letm1	leucine zipper-EF-hand containing transmembrane protein 1 (Letm1)	NM_019694	9789996	8	2914	AUCCCUUG	2907	3UTR	0.0168	2		Ep300	E1A binding protein p300 (Ep300)	NM_177821	123173876
mmu-miR-188-5p	2.70078	3.61642	4.6368	0.00501019	0.0427793	-2.53334	ORF34	family with sequence similarity 120, member C (Fam120c)	NM_198105	126723306	9	4998	CAUCCCUUG	4990	3UTR	0.0167	1		Epc2	enhancer of polycomb homolog 2 (Drosophila) (Epc2)	NM_172663	157042786
mmu-miR-188-5p	2.70078	3.61642	4.6368	0.00501019	0.0427793	-2.53334	Prkaa2	protein kinase, AMP-activated, alpha 2 catalytic subunit (Prkaa2)	NM_178143	227452235	8	5516	CAUCCCUU	5509	3UTR	0.0167	1		Epha3	Eph receptor A3 (Epha3)	NM_010140	145966729
mmu-miR-188-5p	2.70078	3.61642	4.6368	0.00501019	0.0427793	-2.53334	Slitrk4	SLIT and NTRK-like family, member 4 (Slitrk4)	NM_178740	142357201	8	3076	CAUCCCUU	3069	3UTR	0.0167	1		Epha4	Eph receptor A4 (Epha4)	NM_007936	86788142
mmu-miR-188-5p	2.70078	3.61642	4.6368	0.00501019	0.0427793	-2.53334	Zcchc18	zinc finger, CCHC domain containing 18 (Zcchc18)	NM_001035509	78482618	8	1821	CAUCCCUU	1814	3UTR	0.0167	1		Epha8	Eph receptor A8 (Epha8)	NM_007939	154240696
mmu-miR-188-5p	2.70078	3.61642	4.6368	0.00501019	0.0427793	-2.53334	Cdh20	cadherin 20 (Cdh20)	NM_011800	146134464	8	3543	AUCCCUUG	3536	3UTR	0.0166	2		Ephb6	Eph receptor B6 (Ephb6)	NM_007680	226437666
mmu-miR-188-5p	2.70078	3.61642	4.6368	0.00501019	0.0427793	-2.53334	Cnot3	CCR4-NOT transcription complex, subunit 3 (Cnot3)	NM_146176	294345476	7	2681	AUCCCUU	2675	3UTR	0.0166	2		Ephx2	epoxide hydrolase 2, cytoplasmic (Ephx2)	NM_007940	406647872
mmu-miR-188-5p	2.70078	3.61642	4.6368	0.00501019	0.0427793	-2.53334	D630042P16Rik	ssu-2 homolog (C. elegans) (Ssu2)	NM_175525	141802588	7	1191	CAUCCCU	1185	3UTR	0.0166	1		Epn2	epsin 2 (Epn2)	NM_010148	356582236
mmu-miR-188-5p	2.70078	3.61642	4.6368	0.00501019	0.0427793	-2.53334	Hnf1a	HNF1 homeobox A (Hnf1a)	NM_009327	166295201	8	2294	CAUCCCUU	2287	3UTR	0.0166	1		Eps15	epidermal growth factor receptor pathway substrate 15 (Eps15)	NM_007943	229577158
mmu-miR-188-5p	2.70078	3.61642	4.6368	0.00501019	0.0427793	-2.53334	6030408C04Rik	G2/M-phase specific E3 ubiquitin ligase (G2e3)	NM_001015099	269784654	8	2341	CAUCCCUU	2334	3UTR	0.0165	1		Eps8l3	EPS8-like 3 (Eps8l3)	NM_133867	254039730
mmu-miR-188-5p	2.70078	3.61642	4.6368	0.00501019	0.0427793	-2.53334	Adam1a	a disintegrin and metallopeptidase domain 1a (Adam1a)	NM_172126	31559888	7	3015	AUCCCUU	3009	3UTR	0.0164	2		Ercc2	excision repair cross-complementing rodent repair deficiency, complementation group 2 (Ercc2)	NM_007949	145966759
mmu-miR-188-5p	2.70078	3.61642	4.6368	0.00501019	0.0427793	-2.53334	Cidea	cell death-inducing DNA fragmentation factor, alpha subunit-like effector A (Cidea)	NM_007702	162287226	7	1060	AUCCCUU	1054	3UTR	0.0164	2		Ercc3	excision repair cross-complementing rodent repair deficiency, complementation group 3 (Ercc3)	NM_133658	19526799
mmu-miR-188-5p	2.70078	3.61642	4.6368	0.00501019	0.0427793	-2.53334	Muc1	mucin 1, transmembrane (Muc1)	NM_013605	530537203	7	2203	CAUCCCU	2197	3UTR	0.0164	1		Ereg	epiregulin (Ereg)	NM_007950	119709826
mmu-miR-188-5p	2.70078	3.61642	4.6368	0.00501019	0.0427793	-2.53334	Rgs10	regulator of G-protein signalling 10 (Rgs10)	NM_026418	142388581	7	638	CAUCCCU	632	3UTR	0.0164	1		Ergic1	endoplasmic reticulum-golgi intermediate compartment (ERGIC) 1 (Ergic1)	NM_026170	118129827
mmu-miR-188-5p	2.70078	3.61642	4.6368	0.00501019	0.0427793	-2.53334	Rgs9	regulator of G-protein signaling 9 (Rgs9)	NM_011268	146134421	7	2354	CAUCCCU	2348	3UTR	0.0164	1		Ergic2	ERGIC and golgi 2 (Ergic2)	NM_026168	281371349
mmu-miR-188-5p	2.70078	3.61642	4.6368	0.00501019	0.0427793	-2.53334	N6amt1	N-6 adenine-specific DNA methyltransferase 1 (putative) (N6amt1)	NM_026366	226693403	8	1139	AUCCCUUG	1132	3UTR	0.0163	2		Erlin2	ER lipid raft associated 2 (Erlin2)	NM_153592	359279933
mmu-miR-188-5p	2.70078	3.61642	4.6368	0.00501019	0.0427793	-2.53334	Nfix	nuclear factor I/X (Nfix)	NM_001081981	555290131	8	3113	CAUCCCUU	3106	3UTR	0.0161	1		Ero1l	ERO1-like (S. cerevisiae) (Ero1l)	NM_015774	322506110
mmu-miR-188-5p	2.70078	3.61642	4.6368	0.00501019	0.0427793	-2.53334	Tnfaip8	tumor necrosis factor, alpha-induced protein 8 (Tnfaip8)	NM_134131	295444878	8	952	AUCCCUUG	945	3UTR	0.0161	2		Erp29	endoplasmic reticulum protein 29 (Erp29)	NM_026129	31982657
mmu-miR-188-5p	2.70078	3.61642	4.6368	0.00501019	0.0427793	-2.53334	Acaa1a	acetyl-Coenzyme A acyltransferase 1A (Acaa1a)	NM_130864	118131053	7	1737	CAUCCCU	1731	3UTR	0.0159	1		Errfi1	ERBB receptor feedback inhibitor 1 (Errfi1)	NM_133753	19526961
mmu-miR-188-5p	2.70078	3.61642	4.6368	0.00501019	0.0427793	-2.53334	BC043098	family with sequence similarity 168, member B (Fam168b)	NM_174997	237681112	9	1279	CAUCCCUUG	1271	3UTR	0.0159	1		Esam	endothelial cell-specific adhesion molecule (Esam)	NM_027102	255982560
mmu-miR-188-5p	2.70078	3.61642	4.6368	0.00501019	0.0427793	-2.53334	Kmo	kynurenine 3-monooxygenase (kynurenine 3-hydroxylase) (Kmo)	NM_133809	19527029	8	2405	CAUCCCUU	2398	3UTR	0.0158	1		Esd	esterase D/formylglutathione hydrolase (Esd)	NM_016903	550544231
mmu-miR-188-5p	2.70078	3.61642	4.6368	0.00501019	0.0427793	-2.53334	Myo9b	myosin IXb (Myo9b)	NM_015742	124053458	8	6473	CAUCCCUU	6466	3UTR	0.0158	1		Espl1	extra spindle pole bodies 1 (S. cerevisiae) (Espl1)	NM_001014976	237874219
mmu-miR-188-5p	2.70078	3.61642	4.6368	0.00501019	0.0427793	-2.53334	Naip1	NLR family, apoptosis inhibitory protein 1 (Naip1)	NM_008670	114431261	8	5205	AUCCCUUG	5198	3UTR	0.0157	2		Esr2	estrogen receptor 2 (beta) (Esr2)	NM_207707	46877095
mmu-miR-188-5p	2.70078	3.61642	4.6368	0.00501019	0.0427793	-2.53334	Neud4	D4, zinc and double PHD fingers family 1 (Dpf1)	NM_013874	118130893	8	1339	CAUCCCUU	1332	3UTR	0.0157	1		Esrra	estrogen related receptor, alpha (Esrra)	NM_007953	112293261
mmu-miR-188-5p	2.70078	3.61642	4.6368	0.00501019	0.0427793	-2.53334	Tmem39a	transmembrane protein 39a (Tmem39a)	NM_026407	328683454	7	1945	AUCCCUU	1939	3UTR	0.0156	2		Esrrb	estrogen related receptor, beta (Esrrb)	NM_011934	226958364
mmu-miR-188-5p	2.70078	3.61642	4.6368	0.00501019	0.0427793	-2.53334	Alkbh5	alkB, alkylation repair homolog 5 (E. coli) (Alkbh5)	NM_172943	169234735	9	4173	CAUCCCUUG	4165	3UTR	0.0155	1		Etaa1	Ewing tumor-associated antigen 1 (Etaa1)	NM_026576	257153367
mmu-miR-188-5p	2.70078	3.61642	4.6368	0.00501019	0.0427793	-2.53334	Fbxl19	F-box and leucine-rich repeat protein 19 (Fbxl19)	NM_172748	40254239	8	2711	CAUCCCUU	2704	3UTR	0.0154	1		Ethe1	ethylmalonic encephalopathy 1 (Ethe1)	NM_023154	62990178
mmu-miR-188-5p	2.70078	3.61642	4.6368	0.00501019	0.0427793	-2.53334	Gm806	predicted gene 806 (Gm806)	NM_001033400	142374348	7	2489	AUCCCUU	2483	3UTR	0.0153	2		Etl4	enhancer trap locus 4 (Etl4)	NM_001081006	124486587
mmu-miR-188-5p	2.70078	3.61642	4.6368	0.00501019	0.0427793	-2.53334	Mamdc2	MAM domain containing 2 (Mamdc2)	NM_174857	146149246	8	2791	CAUCCCUU	2784	3UTR	0.0153	1		Etv3	ets variant 3 (Etv3)	NM_012051	558516026
mmu-miR-188-5p	2.70078	3.61642	4.6368	0.00501019	0.0427793	-2.53334	Nudt9	nudix (nucleoside diphosphate linked moiety X)-type motif 9 (Nudt9)	NM_028794	142387632	7	1237	AUCCCUU	1231	3UTR	0.0153	2		Evc	Ellis van Creveld gene syndrome (Evc)	NM_021292	269784714
mmu-miR-188-5p	2.70078	3.61642	4.6368	0.00501019	0.0427793	-2.53334	Slc24a4	solute carrier family 24 (sodium/potassium/calcium exchanger)	NM_172152	118130080	7	2084	CAUCCCU	2078	3UTR	0.0153	1		Evi2b	Evi2a-Evi2b readthrough (Evi2a-evi2b)	NM_146023	499137507
mmu-miR-188-5p	2.70078	3.61642	4.6368	0.00501019	0.0427793	-2.53334	Stat6	signal transducer and activator of transcription 6 (Stat6)	NM_009284	128485773	8	3008	CAUCCCUU	3001	3UTR	0.0152	1		Evi5	ecotropic viral integration site 5 (Evi5)	NM_007964	111185904
mmu-miR-188-5p	2.70078	3.61642	4.6368	0.00501019	0.0427793	-2.53334	1500019G21Rik	HSPA (heat shock 70kDa) binding protein, cytoplasmic cochaperone 1 (Hspbp1)	NM_024172	133893257	7	1321	AUCCCUU	1315	3UTR	0.0151	2		Evi5l	ecotropic viral integration site 5 like (Evi5l)	NM_001039578	295317353
mmu-miR-188-5p	2.70078	3.61642	4.6368	0.00501019	0.0427793	-2.53334	9130213B05Rik	prostate androgen-regulated mucin-like protein 1 (Parm1)	NM_145562	118130163	8	1894	CAUCCCUU	1887	3UTR	0.0151	1		Exdl1	exonuclease 3'-5' domain containing 1 (Exd1)	NM_172857	142351361
mmu-miR-188-5p	2.70078	3.61642	4.6368	0.00501019	0.0427793	-2.53334	Aoc2	amine oxidase, copper containing 2 (retina-specific) (Aoc2)	NM_178932	34098971	7	2342	CAUCCCU	2336	3UTR	0.0151	1		Exo1	exonuclease 1 (Exo1)	NM_012012	169234753
mmu-miR-188-5p	2.70078	3.61642	4.6368	0.00501019	0.0427793	-2.53334	Map2k2	mitogen-activated protein kinase kinase 2 (Map2k2)	NM_023138	158533991	8	1632	AUCCCUUG	1625	3UTR	0.0149	2		Exoc1	exocyst complex component 1 (Exoc1)	NM_027270	576795703
mmu-miR-188-5p	2.70078	3.61642	4.6368	0.00501019	0.0427793	-2.53334	Nxph3	neurexophilin 3 (Nxph3)	NM_130858	141803004	8	1177	CAUCCCUU	1170	3UTR	0.0149	1		Exoc4	exocyst complex component 4 (Exoc4)	NM_009148	118130512
mmu-miR-188-5p	2.70078	3.61642	4.6368	0.00501019	0.0427793	-2.53334	Rexo4	REX4, RNA exonuclease 4 homolog (S. cerevisiae) (Rexo4)	NM_207234	76563951	8	1806	AUCCCUUG	1799	3UTR	0.0149	2		Exoc8	exocyst complex component 8 (Exoc8)	NM_198103	111160870
mmu-miR-188-5p	2.70078	3.61642	4.6368	0.00501019	0.0427793	-2.53334	F630110N24Rik	major facilitator superfamily domain containing 12 (Mfsd12)	NM_028657	148540195	7	1625	CAUCCCU	1619	3UTR	0.0147	1		Ext2	exostoses (multiple) 2 (Ext2)	NM_010163	226442844
mmu-miR-188-5p	2.70078	3.61642	4.6368	0.00501019	0.0427793	-2.53334	Gltpd2	glycolipid transfer protein domain containing 2 (Gltpd2)	NM_146020	22122496	7	1024	AUCCCUU	1018	3UTR	0.0147	2		Extl2	exostoses (multiple)-like 2 (Extl2)	NM_021388	254553480
mmu-miR-188-5p	2.70078	3.61642	4.6368	0.00501019	0.0427793	-2.53334	Usp28	ubiquitin specific peptidase 28 (Usp28)	NM_175482	46852150	8	4025	CAUCCCUU	4018	3UTR	0.0147	1		Ezh1	enhancer of zeste homolog 1 (Drosophila) (Ezh1)	NM_007970	692110359
mmu-miR-188-5p	2.70078	3.61642	4.6368	0.00501019	0.0427793	-2.53334	4930550C14Rik	RIKEN cDNA 4930550C14 gene (4930550C14Rik)	NM_029247	146141155	7	1132	AUCCCUU	1126	3UTR	0.0145	2		Ezh2	enhancer of zeste homolog 2 (Drosophila) (Ezh2)	NM_007971	226442802
mmu-miR-188-5p	2.70078	3.61642	4.6368	0.00501019	0.0427793	-2.53334	Chrna9	cholinergic receptor, nicotinic, alpha polypeptide 9 (Chrna9)	NM_001081104	124487390	7	1983	AUCCCUU	1977	3UTR	0.0145	2		F11r	F11 receptor (F11r)	NM_172647	87116673
mmu-miR-188-5p	2.70078	3.61642	4.6368	0.00501019	0.0427793	-2.53334	Dio3	deiodinase, iodothyronine type III (Dio3)	NM_172119	111494233	8	1614	CAUCCCUU	1607	3UTR	0.0145	1		F2rl1	coagulation factor II (thrombin) receptor-like 1 (F2rl1)	NM_007974	171542816
mmu-miR-188-5p	2.70078	3.61642	4.6368	0.00501019	0.0427793	-2.53334	Map2k3	mitogen-activated protein kinase kinase 3 (Map2k3)	NM_008928	158508668	8	1465	AUCCCUUG	1458	3UTR	0.0145	2		F2rl3	coagulation factor II (thrombin) receptor-like 3 (F2rl3)	NM_007975	141803010
mmu-miR-188-5p	2.70078	3.61642	4.6368	0.00501019	0.0427793	-2.53334	Txndc9	thioredoxin domain containing 9 (Txndc9)	NM_172054	141802781	9	4513	CAUCCCUUG	4505	3UTR	0.0144	1		F3	coagulation factor III (F3)	NM_010171	170172539
mmu-miR-188-5p	2.70078	3.61642	4.6368	0.00501019	0.0427793	-2.53334	Abhd13	abhydrolase domain containing 13 (Abhd13)	NM_001081119	124487440	9	2154	AUCCCUUGC	2146	3UTR	0.0142	2		F5	coagulation factor V (F5)	NM_007976	111185910
mmu-miR-188-5p	2.70078	3.61642	4.6368	0.00501019	0.0427793	-2.53334	1300014I06Rik	PX domain containing 1 (Pxdc1)	NM_025831	115292444	8	1698	CAUCCCUU	1691	3UTR	0.0141	1		F630110N24Rik	major facilitator superfamily domain containing 12 (Mfsd12)	NM_028657	148540195
mmu-miR-188-5p	2.70078	3.61642	4.6368	0.00501019	0.0427793	-2.53334	1300014I06Rik	PX domain containing 1 (Pxdc1)	NM_025831	115292444	8	1680	CAUCCCUU	1673	3UTR	0.0141	1		F830116E18Rik	hemoglobin, theta 1B (Hbq1b)	NM_001033981	146198836
mmu-miR-188-5p	2.70078	3.61642	4.6368	0.00501019	0.0427793	-2.53334	Atg4d	autophagy related 4D, cysteine peptidase (Atg4d)	NM_153583	560879432	8	1621	CAUCCCUU	1614	3UTR	0.0141	1		F9	coagulation factor IX (F9)	NM_007979	73661201
mmu-miR-188-5p	2.70078	3.61642	4.6368	0.00501019	0.0427793	-2.53334	Matn3	matrilin 3 (Matn3)	NM_010770	306518577	8	2005	AUCCCUUG	1998	3UTR	0.0141	2		Fa2h	fatty acid 2-hydroxylase (Fa2h)	NM_178086	158517892
mmu-miR-188-5p	2.70078	3.61642	4.6368	0.00501019	0.0427793	-2.53334	Pramef12	PRAME family member 12 (Pramef12)	NM_029948	142377452	8	2200	CAUCCCUU	2193	3UTR	0.0141	1		Fads1	fatty acid desaturase 1 (Fads1)	NM_146094	255982973
mmu-miR-188-5p	2.70078	3.61642	4.6368	0.00501019	0.0427793	-2.53334	Hhex	hematopoietically expressed homeobox (Hhex)	NM_008245	141802813	8	1475	CAUCCCUU	1468	3UTR	0.014	1		Faf1	Fas-associated factor 1 (Faf1)	NM_007983	40789279
mmu-miR-188-5p	2.70078	3.61642	4.6368	0.00501019	0.0427793	-2.53334	Hus1	Hus1 homolog (S. pombe) (Hus1)	NM_008316	145966801	9	2568	CAUCCCUUG	2560	3UTR	0.014	1		Fahd1	fumarylacetoacetate hydrolase domain containing 1 (Fahd1)	NM_023480	115311548
mmu-miR-188-5p	2.70078	3.61642	4.6368	0.00501019	0.0427793	-2.53334	Vangl2	vang-like 2 (van gogh, Drosophila) (Vangl2)	NM_033509	118131201	7	2057	CAUCCCU	2051	3UTR	0.014	1		Faim2	Fas apoptotic inhibitory molecule 2 (Faim2)	NM_028224	408535183
mmu-miR-188-5p	2.70078	3.61642	4.6368	0.00501019	0.0427793	-2.53334	Cyp2c70	cytochrome P450, family 2, subfamily c, polypeptide 70 (Cyp2c70)	NM_145499	268607641	7	1590	CAUCCCU	1584	3UTR	0.0138	1		Fam167a	family with sequence similarity 167, member A (Fam167a)	NM_177628	163644273
mmu-miR-188-5p	2.70078	3.61642	4.6368	0.00501019	0.0427793	-2.53334	Pcsk7	proprotein convertase subtilisin/kexin type 7 (Pcsk7)	NM_008794	112181189	8	3152	AUCCCUUG	3145	3UTR	0.0138	2		Fancd2	Fanconi anemia, complementation group D2 (Fancd2)	NM_001033244	282721082
mmu-miR-188-5p	2.70078	3.61642	4.6368	0.00501019	0.0427793	-2.53334	Tmc2	transmembrane channel-like gene family 2 (Tmc2)	NM_138655	20149733	7	3209	CAUCCCU	3203	3UTR	0.0138	1		Fanci	Fanconi anemia, complementation group I (Fanci)	NM_145946	126722699
mmu-miR-188-5p	2.70078	3.61642	4.6368	0.00501019	0.0427793	-2.53334	Nsmce2	non-SMC element 2 homolog (MMS21, S. cerevisiae) (Nsmce2)	NM_026746	257196204	7	936	CAUCCCU	930	3UTR	0.0137	1		Fancl	Fanconi anemia, complementation group L (Fancl)	NM_025923	472235268
mmu-miR-188-5p	2.70078	3.61642	4.6368	0.00501019	0.0427793	-2.53334	Nsmce2	non-SMC element 2 homolog (MMS21, S. cerevisiae) (Nsmce2)	NM_026746	257196204	7	893	CAUCCCU	887	3UTR	0.0137	1		Fas	Fas (TNF receptor superfamily member 6) (Fas)	NM_007987	226443048
mmu-miR-188-5p	2.70078	3.61642	4.6368	0.00501019	0.0427793	-2.53334	Dnajc22	DnaJ (Hsp40) homolog, subfamily C, member 22 (Dnajc22)	NM_176835	31341187	7	1368	CAUCCCU	1362	3UTR	0.0136	1		Fasl	Fas ligand (TNF superfamily, member 6) (Fasl)	NM_010177	327478403
mmu-miR-188-5p	2.70078	3.61642	4.6368	0.00501019	0.0427793	-2.53334	Hao1	hydroxyacid oxidase 1, liver (Hao1)	NM_010403	133893166	8	1784	CAUCCCUU	1777	3UTR	0.0136	1		Fat4	FAT tumor suppressor homolog 4 (Drosophila) (Fat4)	NM_183221	153792705
mmu-miR-188-5p	2.70078	3.61642	4.6368	0.00501019	0.0427793	-2.53334	Prom1	prominin 1 (Prom1)	NM_008935	254675295	8	3474	AUCCCUUG	3467	3UTR	0.0136	2		Fbln1	fibulin 1 (Fbln1)	NM_010180	168693627
mmu-miR-188-5p	2.70078	3.61642	4.6368	0.00501019	0.0427793	-2.53334	Timd2	T cell immunoglobulin and mucin domain containing 2 (Timd2)	NM_134249	238624133	8	1683	AUCCCUUG	1676	3UTR	0.0136	2		Fbln5	fibulin 5 (Fbln5)	NM_011812	394025695
mmu-miR-188-5p	2.70078	3.61642	4.6368	0.00501019	0.0427793	-2.53334	Sept3	septin 3 (Sept3)	NM_011889	117606374	9	3385	AUCCCUUGC	3377	3UTR	0.0135	2		Fbln7	fibulin 7 (Fbln7)	NM_024237	146134427
mmu-miR-188-5p	2.70078	3.61642	4.6368	0.00501019	0.0427793	-2.53334	Etv3	ets variant 3 (Etv3)	NM_012051	558516026	9	3285	AUCCCUUGC	3277	3UTR	0.0133	2		Fbxl11	lysine (K)-specific demethylase 2A (Kdm2a)	NM_001001984	100818177
mmu-miR-188-5p	2.70078	3.61642	4.6368	0.00501019	0.0427793	-2.53334	Nol10	nucleolar protein 10 (Nol10)	NM_001008421	56606026	8	2788	CAUCCCUU	2781	3UTR	0.0133	1		Fbxl12	F-box and leucine-rich repeat protein 12 (Fbxl12)	NM_013911	557440728
mmu-miR-188-5p	2.70078	3.61642	4.6368	0.00501019	0.0427793	-2.53334	Tbx22	T-box 22 (Tbx22)	NM_145224	595582203	9	3703	AUCCCUUGC	3695	3UTR	0.0133	2		Fbxl19	F-box and leucine-rich repeat protein 19 (Fbxl19)	NM_172748	40254239
mmu-miR-188-5p	2.70078	3.61642	4.6368	0.00501019	0.0427793	-2.53334	Vdac1	voltage-dependent anion channel 1 (Vdac1)	NM_011694	158508670	8	1286	CAUCCCUU	1279	3UTR	0.0132	1		Fbxl22	F-box and leucine-rich repeat protein 22 (Fbxl22)	NM_175206	261862276
mmu-miR-188-5p	2.70078	3.61642	4.6368	0.00501019	0.0427793	-2.53334	Capn9	calpain 9 (Capn9)	NM_023709	251823796	7	2271	AUCCCUU	2265	3UTR	0.013	2		Fbxl7	F-box and leucine-rich repeat protein 7 (Fbxl7)	NM_176959	61657904
mmu-miR-188-5p	2.70078	3.61642	4.6368	0.00501019	0.0427793	-2.53334	Sip1	gem (nuclear organelle) associated protein 2 (Gemin2)	NM_025656	158518435	7	916	CAUCCCU	910	3UTR	0.0129	1		Fbxo11	F-box protein 11 (Fbxo11)	NM_001081034	124486643
mmu-miR-188-5p	2.70078	3.61642	4.6368	0.00501019	0.0427793	-2.53334	C1qtnf9	C1q and tumor necrosis factor related protein 9 (C1qtnf9)	NM_183175	323510616	8	1509	CAUCCCUU	1502	3UTR	0.0128	1		Fbxo3	F-box protein 3 (Fbxo3)	NM_212433	46877054
mmu-miR-188-5p	2.70078	3.61642	4.6368	0.00501019	0.0427793	-2.53334	Dab1	disabled 1 (Dab1)	NM_177259	554790252	9	2477	AUCCCUUGC	2469	3UTR	0.0127	2		Fbxo30	F-box protein 30 (Fbxo30)	NM_027968	269973849
mmu-miR-188-5p	2.70078	3.61642	4.6368	0.00501019	0.0427793	-2.53334	Ppm1f	protein phosphatase 1F (PP2C domain containing) (Ppm1f)	NM_176833	304361732	9	4242	AUCCCUUGC	4234	3UTR	0.0127	2		Fbxo34	F-box protein 34 (Fbxo34)	NM_030236	225703047
mmu-miR-188-5p	2.70078	3.61642	4.6368	0.00501019	0.0427793	-2.53334	Rdh19	retinol dehydrogenase 19 (Rdh19)	NM_147222	117320519	8	1250	AUCCCUUG	1243	3UTR	0.0127	2		Fbxo4	F-box protein 4 (Fbxo4)	NM_134099	256665258
mmu-miR-188-5p	2.70078	3.61642	4.6368	0.00501019	0.0427793	-2.53334	Tspan2	tetraspanin 2 (Tspan2)	NM_027533	341823655	9	3987	AUCCCUUGC	3979	3UTR	0.0127	2		Fbxw4	F-box and WD-40 domain protein 4 (Fbxw4)	NM_013907	118130948
mmu-miR-188-5p	2.70078	3.61642	4.6368	0.00501019	0.0427793	-2.53334	Gpr110	G protein-coupled receptor 110 (Gpr110)	NM_133776	226246674	8	3264	AUCCCUUG	3257	3UTR	0.0126	2		Fcer1a	Fc receptor, IgE, high affinity I, alpha polypeptide (Fcer1a)	NM_010184	226823364
mmu-miR-188-5p	2.70078	3.61642	4.6368	0.00501019	0.0427793	-2.53334	Itpr2	inositol 1,4,5-triphosphate receptor 2 (Itpr2)	NM_019923	408358001	7	8201	CAUCCCU	8195	3UTR	0.0126	1		Fcer1g	Fc receptor, IgE, high affinity I, gamma polypeptide (Fcer1g)	NM_010185	91932796
mmu-miR-188-5p	2.70078	3.61642	4.6368	0.00501019	0.0427793	-2.53334	OTTMUSG00000014964	protein (peptidyl-prolyl cis/trans isomerase) NIMA-interacting 1 (Pin1)	NM_023371	145301623	9	2435	CAUCCCUUG	2427	3UTR	0.0125	1		Fcgr1	Fc receptor, IgG, high affinity I (Fcgr1)	NM_010186	158508457
mmu-miR-188-5p	2.70078	3.61642	4.6368	0.00501019	0.0427793	-2.53334	Cldn14	claudin 14 (Cldn14)	NM_019500	260764014	7	1281	CAUCCCU	1275	3UTR	0.0124	1		Fcgr2b	Fc receptor, IgG, low affinity IIb (Fcgr2b)	NM_001077189	116063578
mmu-miR-188-5p	2.70078	3.61642	4.6368	0.00501019	0.0427793	-2.53334	Mrgprg	MAS-related GPR, member G (Mrgprg)	NM_203492	71896630	8	1164	CAUCCCUU	1157	3UTR	0.0124	1		Fdx1	ferredoxin 1 (Fdx1)	NM_007996	683524005
mmu-miR-188-5p	2.70078	3.61642	4.6368	0.00501019	0.0427793	-2.53334	Slc2a9	solute carrier family 2 (facilitated glucose transporter)	NM_145559	156231024	9	3127	CAUCCCUUG	3119	3UTR	0.0124	1		Fdx1l	ferredoxin 1-like (Fdx1l)	NM_001039824	142378689
mmu-miR-188-5p	2.70078	3.61642	4.6368	0.00501019	0.0427793	-2.53334	Wfdc5	WAP four-disulfide core domain 5 (Wfdc5)	NM_145369	295424148	8	1059	AUCCCUUG	1052	3UTR	0.0124	2		Fdxr	ferredoxin reductase (Fdxr)	NM_007997	6679766
mmu-miR-188-5p	2.70078	3.61642	4.6368	0.00501019	0.0427793	-2.53334	Akt3	thymoma viral proto-oncogene 3 (Akt3)	NM_011785	190883483	9	2743	CAUCCCUUG	2735	3UTR	0.0123	1		Fech	ferrochelatase (Fech)	NM_007998	158508616
mmu-miR-188-5p	2.70078	3.61642	4.6368	0.00501019	0.0427793	-2.53334	Dusp21	dual specificity phosphatase 21 (Dusp21)	NM_028568	58037324	7	780	AUCCCUU	774	3UTR	0.0123	2		Fem1a	feminization 1 homolog a (C. elegans) (Fem1a)	NM_010192	226958668
mmu-miR-188-5p	2.70078	3.61642	4.6368	0.00501019	0.0427793	-2.53334	Plxdc2	plexin domain containing 2 (Plxdc2)	NM_026162	594150353	8	2776	AUCCCUUG	2769	3UTR	0.0123	2		Fen1	flap structure specific endonuclease 1 (Fen1)	NM_007999	410025482
mmu-miR-188-5p	2.70078	3.61642	4.6368	0.00501019	0.0427793	-2.53334	Nf1	neurofibromatosis 1 (Nf1)	NM_010897	118130208	9	9852	CAUCCCUUG	9844	3UTR	0.0122	1		Fer1l3	myoferlin (Myof)	NM_001099634	153791795
mmu-miR-188-5p	2.70078	3.61642	4.6368	0.00501019	0.0427793	-2.53334	Elovl1	elongation of very long chain fatty acids (FEN1/Elo2, SUR4/Elo3, yeast)-like 1 (Elovl1)	NM_001039176	545479160	8	1554	CAUCCCUU	1547	3UTR	0.0121	1		Fermt3	fermitin family homolog 3 (Drosophila) (Fermt3)	NM_153795	270341398
mmu-miR-188-5p	2.70078	3.61642	4.6368	0.00501019	0.0427793	-2.53334	Esrra	estrogen related receptor, alpha (Esrra)	NM_007953	112293261	8	1809	CAUCCCUU	1802	3UTR	0.0121	1		Fev	FEV (ETS oncogene family) (Fev)	NM_153111	237858809
mmu-miR-188-5p	2.70078	3.61642	4.6368	0.00501019	0.0427793	-2.53334	Tspan11	tetraspanin 11 (Tspan11)	NM_026743	133893231	9	1255	CAUCCCUUG	1247	3UTR	0.0121	1		Ffar2	free fatty acid receptor 2 (Ffar2)	NM_146187	270341371
mmu-miR-188-5p	2.70078	3.61642	4.6368	0.00501019	0.0427793	-2.53334	Exoc4	exocyst complex component 4 (Exoc4)	NM_009148	118130512	8	3152	AUCCCUUG	3145	3UTR	0.012	2		Fga	fibrinogen alpha chain (Fga)	NM_010196	167555025
mmu-miR-188-5p	2.70078	3.61642	4.6368	0.00501019	0.0427793	-2.53334	Manea	mannosidase, endo-alpha (Manea)	NM_172865	46048328	9	4216	CAUCCCUUG	4208	3UTR	0.012	1		Fgd2	FYVE, RhoGEF and PH domain containing 2 (Fgd2)	NM_013710	226958606
mmu-miR-188-5p	2.70078	3.61642	4.6368	0.00501019	0.0427793	-2.53334	Triap1	TP53 regulated inhibitor of apoptosis 1 (Triap1)	NM_026933	142344163	8	639	CAUCCCUU	632	3UTR	0.012	1		Fgd3	FYVE, RhoGEF and PH domain containing 3 (Fgd3)	NM_015759	85719308
mmu-miR-188-5p	2.70078	3.61642	4.6368	0.00501019	0.0427793	-2.53334	Pkp4	plakophilin 4 (Pkp4)	NM_026361	148233272	8	3966	CAUCCCUU	3959	3UTR	0.0119	1		Fgd4	FYVE, RhoGEF and PH domain containing 4 (Fgd4)	NM_139232	685504964
mmu-miR-188-5p	2.70078	3.61642	4.6368	0.00501019	0.0427793	-2.53334	Klf6	Kruppel-like factor 6 (Klf6)	NM_011803	84794648	9	1546	CAUCCCUUG	1538	3UTR	0.0118	1		Fgf10	fibroblast growth factor 10 (Fgf10)	NM_008002	226823275
mmu-miR-188-5p	2.70078	3.61642	4.6368	0.00501019	0.0427793	-2.53334	Pcmt1	protein-L-isoaspartate (D-aspartate) O-methyltransferase 1 (Pcmt1)	NM_008786	226530883	8	1180	AUCCCUUG	1173	3UTR	0.0118	2		Fgf14	fibroblast growth factor 14 (Fgf14)	NM_207667	178557810
mmu-miR-188-5p	2.70078	3.61642	4.6368	0.00501019	0.0427793	-2.53334	9030418K01Rik	family with sequence similarity 217, member B (Fam217b)	NM_001081289	124486858	8	1793	AUCCCUUG	1786	3UTR	0.0117	2		Fgf4	fibroblast growth factor 4 (Fgf4)	NM_010202	158508679
mmu-miR-188-5p	2.70078	3.61642	4.6368	0.00501019	0.0427793	-2.53334	Mefv	Mediterranean fever (Mefv)	NM_019453	241666416	8	2880	CAUCCCUU	2873	3UTR	0.0117	1		Fgf5	fibroblast growth factor 5 (Fgf5)	NM_010203	471270258
mmu-miR-188-5p	2.70078	3.61642	4.6368	0.00501019	0.0427793	-2.53334	Taldo1	transaldolase 1 (Taldo1)	NM_011528	291291015	7	1153	AUCCCUU	1147	3UTR	0.0117	2		Fgf9	fibroblast growth factor 9 (Fgf9)	NM_013518	261824046
mmu-miR-188-5p	2.70078	3.61642	4.6368	0.00501019	0.0427793	-2.53334	Ttc25	tetratricopeptide repeat domain 25 (Ttc25)	NM_028918	124358956	8	2081	CAUCCCUU	2074	3UTR	0.0117	1		Fgfbp1	fibroblast growth factor binding protein 1 (Fgfbp1)	NM_008009	410025490
mmu-miR-188-5p	2.70078	3.61642	4.6368	0.00501019	0.0427793	-2.53334	Rnft1	ring finger protein, transmembrane 1 (Rnft1)	NM_029788	158508699	9	2884	CAUCCCUUG	2876	3UTR	0.0116	1		Fgfr1	fibroblast growth factor receptor 1 (Fgfr1)	NM_001079909	554790384
mmu-miR-188-5p	2.70078	3.61642	4.6368	0.00501019	0.0427793	-2.53334	Unc5d	unc-5 homolog D (C. elegans) (Unc5d)	NM_153135	228008378	8	6502	CAUCCCUU	6495	3UTR	0.0115	1		Fgfr1op2	FGFR1 oncogene partner 2 (Fgfr1op2)	NM_026218	118601005
mmu-miR-188-5p	2.70078	3.61642	4.6368	0.00501019	0.0427793	-2.53334	Unc5d	unc-5 homolog D (C. elegans) (Unc5d)	NM_153135	228008378	8	5957	AUCCCUUG	5950	3UTR	0.0115	2		Fhl3	four and a half LIM domains 3 (Fhl3)	NM_010213	291167794
mmu-miR-188-5p	2.70078	3.61642	4.6368	0.00501019	0.0427793	-2.53334	Mapk8ip2	mitogen-activated protein kinase 8 interacting protein 2 (Mapk8ip2)	NM_021921	257096007	8	3025	AUCCCUUG	3018	3UTR	0.0114	2		Fhod1	formin homology 2 domain containing 1 (Fhod1)	NM_177699	269973930
mmu-miR-188-5p	2.70078	3.61642	4.6368	0.00501019	0.0427793	-2.53334	Rsrc2	arginine/serine-rich coiled-coil 2 (Rsrc2)	NM_001005525	459352766	8	2138	CAUCCCUU	2131	3UTR	0.0113	1		Fig4	FIG4 homolog (S. cerevisiae) (Fig4)	NM_133999	19527219
mmu-miR-188-5p	2.70078	3.61642	4.6368	0.00501019	0.0427793	-2.53334	Tuba1a	tubulin, alpha 1A (Tuba1a)	NM_011653	133892260	7	1439	CAUCCCU	1433	3UTR	0.0113	1		Figf	c-fos induced growth factor (Figf)	NM_010216	6753873
mmu-miR-188-5p	2.70078	3.61642	4.6368	0.00501019	0.0427793	-2.53334	Fbxl11	lysine (K)-specific demethylase 2A (Kdm2a)	NM_001001984	100818177	9	6033	AUCCCUUGC	6025	3UTR	0.0112	2		Fignl1	fidgetin-like 1 (Fignl1)	NM_021891	254039739
mmu-miR-188-5p	2.70078	3.61642	4.6368	0.00501019	0.0427793	-2.53334	Slc5a7	solute carrier family 5 (choline transporter)	NM_022025	294832038	9	4023	AUCCCUUGC	4015	3UTR	0.0112	2		Fis1	fission 1 (mitochondrial outer membrane) homolog (yeast) (Fis1)	NM_025562	253735729
mmu-miR-188-5p	2.70078	3.61642	4.6368	0.00501019	0.0427793	-2.53334	Mgat3	mannoside acetylglucosaminyltransferase 3 (Mgat3)	NM_010795	413081655	9	2299	CAUCCCUUG	2291	3UTR	0.0111	1		Fkbp14	FK506 binding protein 14 (Fkbp14)	NM_153573	23956365
mmu-miR-188-5p	2.70078	3.61642	4.6368	0.00501019	0.0427793	-2.53334	Tfip11	tuftelin interacting protein 11 (Tfip11)	NM_018783	118130732	8	3307	CAUCCCUU	3300	3UTR	0.0111	1		Fkbp1b	FK506 binding protein 1b (Fkbp1b)	NM_016863	123173727
mmu-miR-188-5p	2.70078	3.61642	4.6368	0.00501019	0.0427793	-2.53334	Tmco5	transmembrane and coiled-coil domains 5 (Tmco5)	NM_026104	293629287	7	1023	CAUCCCU	1017	3UTR	0.0111	1		Fkbp4	centrosomal protein 55 (Cep55)	NM_028760	256355029
mmu-miR-188-5p	2.70078	3.61642	4.6368	0.00501019	0.0427793	-2.53334	Susd2	sushi domain containing 2 (Susd2)	NM_027890	251823823	8	2792	CAUCCCUU	2785	3UTR	0.011	1		Fkbp7	FK506 binding protein 7 (Fkbp7)	NM_010222	242247662
mmu-miR-188-5p	2.70078	3.61642	4.6368	0.00501019	0.0427793	-2.53334	Fignl1	fidgetin-like 1 (Fignl1)	NM_021891	254039739	8	2744	AUCCCUUG	2737	3UTR	0.0109	2		Flad1	RFad1, flavin adenine dinucleotide synthetase, homolog (yeast) (Flad1)	NM_177041	89337261
mmu-miR-188-5p	2.70078	3.61642	4.6368	0.00501019	0.0427793	-2.53334	Mpg	N-methylpurine-DNA glycosylase (Mpg)	NM_010822	268370033	8	1259	CAUCCCUU	1252	3UTR	0.0109	1		Flnc	filamin C, gamma (Flnc)	NM_001081185	124487138
mmu-miR-188-5p	2.70078	3.61642	4.6368	0.00501019	0.0427793	-2.53334	Rassf1	Ras association (RalGDS/AF-6) domain family member 1 (Rassf1)	NM_019713	344217755	8	1585	CAUCCCUU	1578	3UTR	0.0109	1		Flrt1	fibronectin leucine rich transmembrane protein 1 (Flrt1)	NM_201411	170650675
mmu-miR-188-5p	2.70078	3.61642	4.6368	0.00501019	0.0427793	-2.53334	Micall2	MICAL-like 2 (Micall2)	NM_174850	254553309	7	3088	AUCCCUU	3082	3UTR	0.0108	2		Flrt2	fibronectin leucine rich transmembrane protein 2 (Flrt2)	NM_201518	254540056
mmu-miR-188-5p	2.70078	3.61642	4.6368	0.00501019	0.0427793	-2.53334	Ppm1j	protein phosphatase 1J (Ppm1j)	NM_027982	114205423	7	1670	AUCCCUU	1664	3UTR	0.0108	2		Flvcr1	major facilitator superfamily domain containing 7B (Mfsd7b)	NM_001081259	124486924
mmu-miR-188-5p	2.70078	3.61642	4.6368	0.00501019	0.0427793	-2.53334	Mta2	metastasis-associated gene family, member 2 (Mta2)	NM_011842	51491879	8	2772	CAUCCCUU	2765	3UTR	0.0107	1		Fmn1	formin 1 (Fmn1)	NM_010230	112807204
mmu-miR-188-5p	2.70078	3.61642	4.6368	0.00501019	0.0427793	-2.53334	2310047M10Rik	RIKEN cDNA 2310047M10 gene (2310047M10Rik)	NM_028005	142369094	8	1321	CAUCCCUU	1314	3UTR	0.0106	1		Fmnl2	formin-like 2 (Fmnl2)	NM_172409	124378047
mmu-miR-188-5p	2.70078	3.61642	4.6368	0.00501019	0.0427793	-2.53334	Olfr722	olfactory receptor 722 (Olfr722)	NM_146494	34328366	8	1386	CAUCCCUU	1379	3UTR	0.0105	1		Fmo5	flavin containing monooxygenase 5 (Fmo5)	NM_010232	239937549
mmu-miR-188-5p	2.70078	3.61642	4.6368	0.00501019	0.0427793	-2.53334	Prom2	prominin 2 (Prom2)	NM_138750	224994181	7	3284	CAUCCCU	3278	3UTR	0.0105	1		Fmr1	fragile X mental retardation syndrome 1 (Fmr1)	NM_008031	594150414
mmu-miR-188-5p	2.70078	3.61642	4.6368	0.00501019	0.0427793	-2.53334	Spnb1	spectrin beta, erythrocytic (Sptb)	NM_013675	84490393	9	9516	CAUCCCUUG	9508	3UTR	0.0105	1		Fnbp1	formin binding protein 1 (Fnbp1)	NM_001038700	294997319
mmu-miR-188-5p	2.70078	3.61642	4.6368	0.00501019	0.0427793	-2.53334	Gabrg3	gamma-aminobutyric acid (GABA) A receptor, subunit gamma 3 (Gabrg3)	NM_008074	117168290	7	1520	CAUCCCU	1514	3UTR	0.0104	1		Fndc5	fibronectin type III domain containing 5 (Fndc5)	NM_027402	254911019
mmu-miR-188-5p	2.70078	3.61642	4.6368	0.00501019	0.0427793	-2.53334	Psmc1	protease (prosome, macropain) 26S subunit, ATPase 1 (Psmc1)	NM_008947	145966736	7	1355	CAUCCCU	1349	3UTR	0.0104	1		Fnip1	folliculin interacting protein 1 (Fnip1)	NM_173753	281306834
mmu-miR-188-5p	2.70078	3.61642	4.6368	0.00501019	0.0427793	-2.53334	Spred3	sprouty-related, EVH1 domain containing 3 (Spred3)	NM_182927	188219586	9	3321	CAUCCCUUG	3313	3UTR	0.0104	1		Folr4	IZUMO1 receptor, JUNO (Izumo1r)	NM_176807	160333398
mmu-miR-188-5p	2.70078	3.61642	4.6368	0.00501019	0.0427793	-2.53334	Gcet2	germinal center associated, signaling and motility (Gcsam)	NM_008099	226530837	9	1218	AUCCCUUGC	1210	3UTR	0.0103	2		Fos	FBJ osteosarcoma oncogene (Fos)	NM_010234	31560587
mmu-miR-188-5p	2.70078	3.61642	4.6368	0.00501019	0.0427793	-2.53334	Plek	pleckstrin (Plek)	NM_019549	254039682	9	3267	AUCCCUUGC	3259	3UTR	0.0103	2		Foxb1	forkhead box B1 (Foxb1)	NM_022378	159031987
mmu-miR-188-5p	2.70078	3.61642	4.6368	0.00501019	0.0427793	-2.53334	Fgd3	FYVE, RhoGEF and PH domain containing 3 (Fgd3)	NM_015759	85719308	8	2519	CAUCCCUU	2512	3UTR	0.0102	1		Foxc2	forkhead box C2 (Foxc2)	NM_013519	159032067
mmu-miR-188-5p	2.70078	3.61642	4.6368	0.00501019	0.0427793	-2.53334	Dnajb13	DnaJ (Hsp40) related, subfamily B, member 13 (Dnajb13)	NM_153527	29648321	7	1036	CAUCCCU	1030	3UTR	0.0101	1		Foxd4	forkhead box D4 (Foxd4)	NM_008022	261824060
mmu-miR-188-5p	2.70078	3.61642	4.6368	0.00501019	0.0427793	-2.53334	Aup1	ancient ubiquitous protein 1 (Aup1)	NM_007517	675294845	7	1469	CAUCCCU	1463	3UTR	0.01	1		Foxg1	forkhead box G1 (Foxg1)	NM_008241	231571497
mmu-miR-188-5p	2.70078	3.61642	4.6368	0.00501019	0.0427793	-2.53334	Cecr5	cat eye syndrome chromosome region, candidate 5 (Cecr5)	NM_144815	51093868	8	1461	CAUCCCUU	1454	3UTR	0.01	1		Foxj2	forkhead box J2 (Foxj2)	NM_021899	281371495
mmu-miR-188-5p	2.70078	3.61642	4.6368	0.00501019	0.0427793	-2.53334	Gli1	GLI-Kruppel family member GLI1 (Gli1)	NM_010296	90186272	7	3559	CAUCCCU	3553	3UTR	0.01	1		Foxm1	forkhead box M1 (Foxm1)	NM_008021	124517696
mmu-miR-188-5p	2.70078	3.61642	4.6368	0.00501019	0.0427793	-2.53334	Osta	solute carrier family 51, alpha subunit (Slc51a)	NM_145932	142351565	7	1517	CAUCCCU	1511	3UTR	0.01	1		Foxo6	forkhead box O6 (Foxo6)	NM_194060	34610226
mmu-miR-188-5p	2.70078	3.61642	4.6368	0.00501019	0.0427793	-2.53334	Hook3	hook homolog 3 (Drosophila) (Hook3)	NM_207659	169234754	10	5252	CAUCCCUUGC	5243	3UTR	0.0099	1		Foxp3	forkhead box P3 (Foxp3)	NM_054039	313569789
mmu-miR-188-5p	2.70078	3.61642	4.6368	0.00501019	0.0427793	-2.53334	Med23	mediator complex subunit 23 (Med23)	NM_027347	261878546	8	4686	CAUCCCUU	4679	3UTR	0.0099	1		Foxr2	forkhead box R2 (Foxr2)	NM_001034894	237874236
mmu-miR-188-5p	2.70078	3.61642	4.6368	0.00501019	0.0427793	-2.53334	Pbp2	phosphatidylethanolamine binding protein 2 (Pbp2)	NM_029595	128485804	8	702	AUCCCUUG	695	3UTR	0.0099	2		Fpgs	folylpolyglutamyl synthetase (Fpgs)	NM_010236	172088162
mmu-miR-188-5p	2.70078	3.61642	4.6368	0.00501019	0.0427793	-2.53334	Rasgrp1	RAS guanyl releasing protein 1 (Rasgrp1)	NM_011246	40254575	9	4115	AUCCCUUGC	4107	3UTR	0.0099	2		Fpr1	formyl peptide receptor 1 (Fpr1)	NM_013521	71361679
mmu-miR-188-5p	2.70078	3.61642	4.6368	0.00501019	0.0427793	-2.53334	Cdh7	cadherin 7, type 2 (Cdh7)	NM_172853	118129933	8	2903	AUCCCUUG	2896	3UTR	0.0098	2		Fpr-rs2	formyl peptide receptor 2 (Fpr2)	NM_008039	50345973
mmu-miR-188-5p	2.70078	3.61642	4.6368	0.00501019	0.0427793	-2.53334	Dcps	decapping enzyme, scavenger (Dcps)	NM_027030	142352443	7	1084	AUCCCUU	1078	3UTR	0.0096	2		Fras1	Fraser syndrome 1 homolog (human) (Fras1)	NM_175473	126157514
mmu-miR-188-5p	2.70078	3.61642	4.6368	0.00501019	0.0427793	-2.53334	Med9	mediator complex subunit 9 (Med9)	NM_138675	84579900	9	2572	AUCCCUUGC	2564	3UTR	0.0096	2		Frem2	Fras1 related extracellular matrix protein 2 (Frem2)	NM_172862	110815845
mmu-miR-188-5p	2.70078	3.61642	4.6368	0.00501019	0.0427793	-2.53334	Cuedc2	CUE domain containing 2 (Cuedc2)	NM_024192	256773249	7	1064	CAUCCCU	1058	3UTR	0.0095	1		Frk	fyn-related kinase (Frk)	NM_010237	227116295
mmu-miR-188-5p	2.70078	3.61642	4.6368	0.00501019	0.0427793	-2.53334	Efemp2	epidermal growth factor-containing fibulin-like extracellular matrix protein 2 (Efemp2)	NM_021474	256355189	7	1714	CAUCCCU	1708	3UTR	0.0095	1		Frmd3	FERM domain containing 3 (Frmd3)	NM_172869	254910988
mmu-miR-188-5p	2.70078	3.61642	4.6368	0.00501019	0.0427793	-2.53334	Gjb1	gap junction protein, beta 1 (Gjb1)	NM_008124	699114746	8	1318	CAUCCCUU	1311	3UTR	0.0095	1		Frmd4a	FERM domain containing 4A (Frmd4a)	NM_172475	295389921
mmu-miR-188-5p	2.70078	3.61642	4.6368	0.00501019	0.0427793	-2.53334	Gpd2	glycerol phosphate dehydrogenase 2, mitochondrial (Gpd2)	NM_010274	224922802	7	2537	AUCCCUU	2531	3UTR	0.0094	2		Frmd4b	FERM domain containing 4B (Frmd4b)	NM_145148	172088096
mmu-miR-188-5p	2.70078	3.61642	4.6368	0.00501019	0.0427793	-2.53334	Optc	opticin (Optc)	NM_054076	380862356	8	1658	CAUCCCUU	1651	3UTR	0.0094	1		Frmd5	FERM domain containing 5 (Frmd5)	NM_172673	115298679
mmu-miR-188-5p	2.70078	3.61642	4.6368	0.00501019	0.0427793	-2.53334	Zfp787	zinc finger protein 787 (Zfp787)	NM_001013012	67846114	8	1865	CAUCCCUU	1858	3UTR	0.0094	1		Frs3	fibroblast growth factor receptor substrate 3 (Frs3)	NM_144939	118130081
mmu-miR-188-5p	2.70078	3.61642	4.6368	0.00501019	0.0427793	-2.53334	Fpr-rs2	formyl peptide receptor 2 (Fpr2)	NM_008039	50345973	7	1160	AUCCCUU	1154	3UTR	0.0093	2		Fryl	furry homolog-like (Drosophila) (Fryl)	NM_028194	119964715
mmu-miR-188-5p	2.70078	3.61642	4.6368	0.00501019	0.0427793	-2.53334	Adcy6	adenylate cyclase 6 (Adcy6)	NM_007405	86604720	9	4859	CAUCCCUUG	4851	3UTR	0.009	1		Fsd1l	fibronectin type III and SPRY domain containing 1-like (Fsd1l)	NM_176966	305632822
mmu-miR-188-5p	2.70078	3.61642	4.6368	0.00501019	0.0427793	-2.53334	C1ql3	C1q-like 3 (C1ql3)	NM_153155	109689714	9	2888	AUCCCUUGC	2880	3UTR	0.009	2		Ftmt	ferritin mitochondrial (Ftmt)	NM_026286	247270150
mmu-miR-188-5p	2.70078	3.61642	4.6368	0.00501019	0.0427793	-2.53334	Calcoco1	calcium binding and coiled coil domain 1 (Calcoco1)	NM_026192	298676544	8	2584	AUCCCUUG	2577	3UTR	0.009	2		Fubp3	far upstream element (FUSE) binding protein 3 (Fubp3)	NM_001033389	594542523
mmu-miR-188-5p	2.70078	3.61642	4.6368	0.00501019	0.0427793	-2.53334	Plac9	placenta specific 9a (Plac9a)	NM_207229	46402208	7	350	CAUCCCU	344	3UTR	0.0089	1		Fuca2	fucosidase, alpha-L- 2, plasma (Fuca2)	NM_025799	146134981
mmu-miR-188-5p	2.70078	3.61642	4.6368	0.00501019	0.0427793	-2.53334	Mapbpip	late endosomal/lysosomal adaptor, MAPK and MTOR activator 2 (Lamtor2)	NM_031248	42476187	7	474	AUCCCUU	468	3UTR	0.0088	2		Fuk	fucokinase (Fuk)	NM_172283	391324722
mmu-miR-188-5p	2.70078	3.61642	4.6368	0.00501019	0.0427793	-2.53334	Slc22a1	solute carrier family 22 (organic cation transporter)	NM_009202	158508702	7	1858	CAUCCCU	1852	3UTR	0.0088	1		Fut11	fucosyltransferase 11 (Fut11)	NM_028428	118130486
mmu-miR-188-5p	2.70078	3.61642	4.6368	0.00501019	0.0427793	-2.53334	BC048679	cDNA sequence BC048679 (BC048679)	NM_183143	300796823	7	500	AUCCCUU	494	3UTR	0.0086	2		Fut2	fucosyltransferase 2 (Fut2)	NM_018876	431822424
mmu-miR-188-5p	2.70078	3.61642	4.6368	0.00501019	0.0427793	-2.53334	1700029P11Rik	RIKEN cDNA 1700029P11 gene (1700029P11Rik)	NM_025503	325995131	8	523	AUCCCUUG	516	3UTR	0.0084	2		Fut8	fucosyltransferase 8 (Fut8)	NM_016893	357933608
mmu-miR-188-5p	2.70078	3.61642	4.6368	0.00501019	0.0427793	-2.53334	Nagpa	N-acetylglucosamine-1-phosphodiester alpha-N-acetylglucosaminidase (Nagpa)	NM_013796	241982767	8	2048	CAUCCCUU	2041	3UTR	0.0084	1		Fut9	fucosyltransferase 9 (Fut9)	NM_010243	84794634
mmu-miR-188-5p	2.70078	3.61642	4.6368	0.00501019	0.0427793	-2.53334	Ppyr1	neuropeptide Y receptor Y4 (Npy4r)	NM_008919	157057096	8	1708	AUCCCUUG	1701	3UTR	0.0084	2		Fxn	frataxin (Fxn)	NM_008044	133892935
mmu-miR-188-5p	2.70078	3.61642	4.6368	0.00501019	0.0427793	-2.53334	Wdr3	WD repeat domain 3 (Wdr3)	NM_175552	256773239	8	3293	CAUCCCUU	3286	3UTR	0.0084	1		Fxyd2	FXYD domain-containing ion transport regulator 2 (Fxyd2)	NM_052823	122937379
mmu-miR-188-5p	2.70078	3.61642	4.6368	0.00501019	0.0427793	-2.53334	1700012A03Rik	RIKEN cDNA 1700012A03 gene (1700012A03Rik)	NM_029587	142343827	7	823	CAUCCCU	817	3UTR	0.0083	1		Fxyd3	FXYD domain-containing ion transport regulator 3 (Fxyd3)	NM_008557	255708415
mmu-miR-188-5p	2.70078	3.61642	4.6368	0.00501019	0.0427793	-2.53334	Dbp	D site albumin promoter binding protein (Dbp)	NM_016974	253795448	8	1806	CAUCCCUU	1799	3UTR	0.0083	1		Fyco1	FYVE and coiled-coil domain containing 1 (Fyco1)	NM_148925	485050406
mmu-miR-188-5p	2.70078	3.61642	4.6368	0.00501019	0.0427793	-2.53334	0610006I08Rik	transmembrane protein 223 (Tmem223)	NM_025791	13385261	7	657	CAUCCCU	651	3UTR	0.0082	1		Fzd2	frizzled homolog 2 (Drosophila) (Fzd2)	NM_020510	125628663
mmu-miR-188-5p	2.70078	3.61642	4.6368	0.00501019	0.0427793	-2.53334	6430548M08Rik	RIKEN cDNA 6430548M08 gene (6430548M08Rik)	NM_172286	255069799	9	2432	CAUCCCUUG	2424	3UTR	0.0082	1		Fzd3	frizzled homolog 3 (Drosophila) (Fzd3)	NM_021458	226958405
mmu-miR-188-5p	2.70078	3.61642	4.6368	0.00501019	0.0427793	-2.53334	Acot3	acyl-CoA thioesterase 3 (Acot3)	NM_134246	118129952	8	2491	CAUCCCUU	2484	3UTR	0.0082	1		Fzr1	fizzy/cell division cycle 20 related 1 (Drosophila) (Fzr1)	NM_019757	9789958
mmu-miR-188-5p	2.70078	3.61642	4.6368	0.00501019	0.0427793	-2.53334	BC022224	dehydrogenase/reductase (SDR family) member 11 (Dhrs11)	NM_177564	262263396	8	1148	CAUCCCUU	1141	3UTR	0.0081	1		G6pc2	glucose-6-phosphatase, catalytic, 2 (G6pc2)	NM_021331	578888061
mmu-miR-188-5p	2.70078	3.61642	4.6368	0.00501019	0.0427793	-2.53334	Eif4a1	eukaryotic translation initiation factor 4A1 (Eif4a1)	NM_144958	226823307	8	1436	AUCCCUUG	1429	3UTR	0.0081	2		G6pdx	glucose-6-phosphate dehydrogenase X-linked (G6pdx)	NM_008062	50053914
mmu-miR-188-5p	2.70078	3.61642	4.6368	0.00501019	0.0427793	-2.53334	Pdk4	pyruvate dehydrogenase kinase, isoenzyme 4 (Pdk4)	NM_013743	118130875	9	2569	CAUCCCUUG	2561	3UTR	0.008	1		Gab3	growth factor receptor bound protein 2-associated protein 3	NM_153073	142356007
mmu-miR-188-5p	2.70078	3.61642	4.6368	0.00501019	0.0427793	-2.53334	Lrrc10	leucine rich repeat containing 10 (Lrrc10)	NM_146242	113930741	8	980	CAUCCCUU	973	3UTR	0.0079	1		Gabarap	gamma-aminobutyric acid receptor associated protein (Gabarap)	NM_019749	226423859
mmu-miR-188-5p	2.70078	3.61642	4.6368	0.00501019	0.0427793	-2.53334	Rfwd3	ring finger and WD repeat domain 3 (Rfwd3)	NM_146218	146149312	9	3544	AUCCCUUGC	3536	3UTR	0.0079	2		Gabpa	GA repeat binding protein, alpha (Gabpa)	NM_008065	34328118
mmu-miR-188-5p	2.70078	3.61642	4.6368	0.00501019	0.0427793	-2.53334	2410008K03Rik	GATS protein-like 3 (Gatsl3)	NM_028022	58037268	8	1153	AUCCCUUG	1146	3UTR	0.0078	2		Gabpb2	GA repeat binding protein, beta 2 (Gabpb2)	NM_172512	124301202
mmu-miR-188-5p	2.70078	3.61642	4.6368	0.00501019	0.0427793	-2.53334	Cd97	CD97 antigen (Cd97)	NM_011925	251823834	8	2594	CAUCCCUU	2587	3UTR	0.0078	1		Gabra1	gamma-aminobutyric acid (GABA) A receptor, subunit alpha 1 (Gabra1)	NM_010250	472235271
mmu-miR-188-5p	2.70078	3.61642	4.6368	0.00501019	0.0427793	-2.53334	4631426J05Rik	carbohydrate (N-acetylgalactosamine 4-sulfate 6-O) sulfotransferase 15 (Chst15)	NM_029935	158508649	9	3522	CAUCCCUUG	3514	3UTR	0.0077	1		Gabra3	gamma-aminobutyric acid (GABA) A receptor, subunit alpha 3 (Gabra3)	NM_008067	247269170
mmu-miR-188-5p	2.70078	3.61642	4.6368	0.00501019	0.0427793	-2.53334	Cd74	CD74 antigen (invariant polypeptide of major histocompatibility complex, class II antigen-associated) (Cd74)	NM_001042605	110624769	8	1212	AUCCCUUG	1205	3UTR	0.0077	2		Gabra5	gamma-aminobutyric acid (GABA) A receptor, subunit alpha 5 (Gabra5)	NM_176942	146198779
mmu-miR-188-5p	2.70078	3.61642	4.6368	0.00501019	0.0427793	-2.53334	Hcfc1r1	host cell factor C1 regulator 1 (XPO1-dependent) (Hcfc1r1)	NM_181821	32451499	8	808	CAUCCCUU	801	3UTR	0.0077	1		Gabra6	gamma-aminobutyric acid (GABA) A receptor, subunit alpha 6 (Gabra6)	NM_008068	595582348
mmu-miR-188-5p	2.70078	3.61642	4.6368	0.00501019	0.0427793	-2.53334	Eif4enif1	eukaryotic translation initiation factor 4E nuclear import factor 1 (Eif4enif1)	NM_023743	262118199	8	3213	AUCCCUUG	3206	3UTR	0.0075	2		Gabrd	gamma-aminobutyric acid (GABA) A receptor, subunit delta (Gabrd)	NM_008072	160707922
mmu-miR-188-5p	2.70078	3.61642	4.6368	0.00501019	0.0427793	-2.53334	Plekha6	pleckstrin homology domain containing, family A member 6 (Plekha6)	NM_182930	237681202	9	6053	CAUCCCUUG	6045	3UTR	0.0075	1		Gabrg2	gamma-aminobutyric acid (GABA) A receptor, subunit gamma 2 (Gabrg2)	NM_008073	444741655
mmu-miR-188-5p	2.70078	3.61642	4.6368	0.00501019	0.0427793	-2.53334	2610036D13Rik	TELO2 interacting protein 1 (Tti1)	NM_029282	33859731	8	3678	AUCCCUUG	3671	3UTR	0.0074	2		Gabrg3	gamma-aminobutyric acid (GABA) A receptor, subunit gamma 3 (Gabrg3)	NM_008074	117168290
mmu-miR-188-5p	2.70078	3.61642	4.6368	0.00501019	0.0427793	-2.53334	Aldh3b1	aldehyde dehydrogenase 3 family, member B1 (Aldh3b1)	NM_026316	34328287	8	1608	CAUCCCUU	1601	3UTR	0.0074	1		Gad1	glutamate decarboxylase 1 (Gad1)	NM_008077	145301579
mmu-miR-188-5p	2.70078	3.61642	4.6368	0.00501019	0.0427793	-2.53334	Celsr1	cadherin, EGF LAG seven-pass G-type receptor 1 (flamingo homolog, Drosophila) (Celsr1)	NM_009886	115648152	9	10339	CAUCCCUUG	10331	3UTR	0.0074	1		Galc	galactosylceramidase (Galc)	NM_008079	93102410
mmu-miR-188-5p	2.70078	3.61642	4.6368	0.00501019	0.0427793	-2.53334	Ifrd2	interferon-related developmental regulator 2 (Ifrd2)	NM_025903	141801695	8	1642	AUCCCUUG	1635	3UTR	0.0073	2		Gale	galactose-4-epimerase, UDP (Gale)	NM_178389	118130587
mmu-miR-188-5p	2.70078	3.61642	4.6368	0.00501019	0.0427793	-2.53334	Tlcd1	TLC domain containing 1 (Tlcd1)	NM_026708	601984165	8	873	CAUCCCUU	866	3UTR	0.0073	1		Galm	galactose mutarotase (Galm)	NM_176963	146198545
mmu-miR-188-5p	2.70078	3.61642	4.6368	0.00501019	0.0427793	-2.53334	Crtc2	CREB regulated transcription coactivator 2 (Crtc2)	NM_028881	254028192	8	2509	CAUCCCUU	2502	3UTR	0.0072	1		Galnt1	UDP-N-acetyl-alpha-D-galactosamine:polypeptide N-acetylgalactosaminyltransferase 1 (Galnt1)	NM_013814	237874258
[truncated: 4,566 more rows]

## Sheet: GO enrichment
Table S3. GO analysis on the target genes of differentially expressed miRNAs in CCl4-induced liver fibrosis.
[truncated: 6,472 more rows]

[truncated: 1 more sheets: KEGG pathway enrichment]
